# Supplementary material for: Defining the interactome of the human mitochondrial ribosome identifies SMIM4 and TMEM223 as respiratory chain assembly factors
Source: eLife journal article supplement (doi:10.7554/elife.68213), 2021-12-17

Figure 5 source data 2 related to Figure 5B

Glucose Galactose

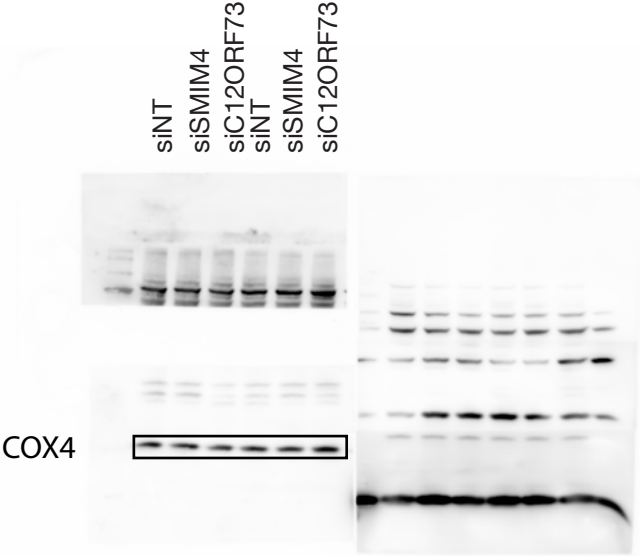

Glucose Galactose Glucose Galactose

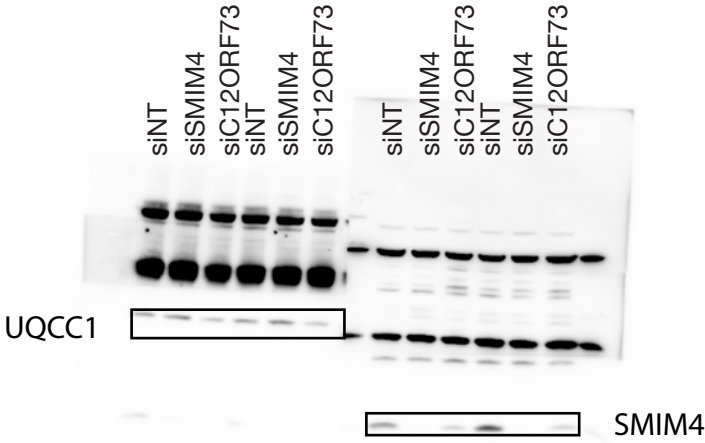

Glucose Galactose

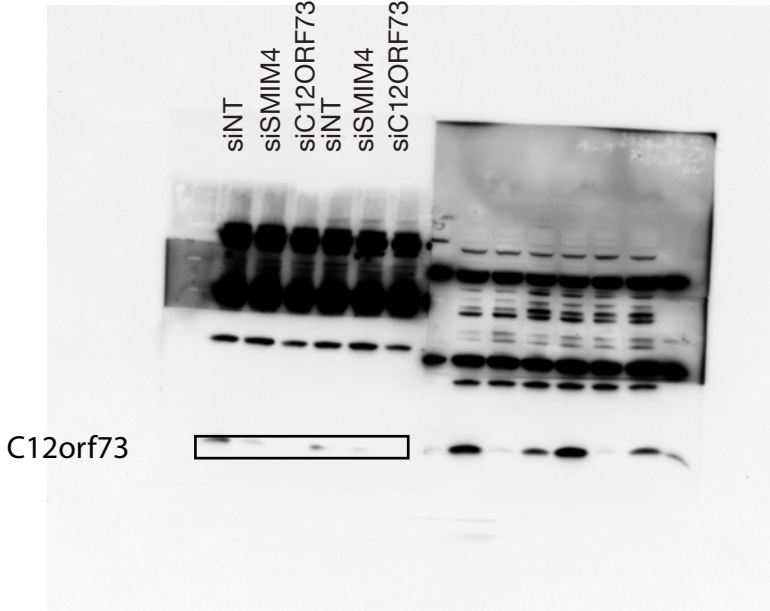

Glucose Galactose Glucose Galactose

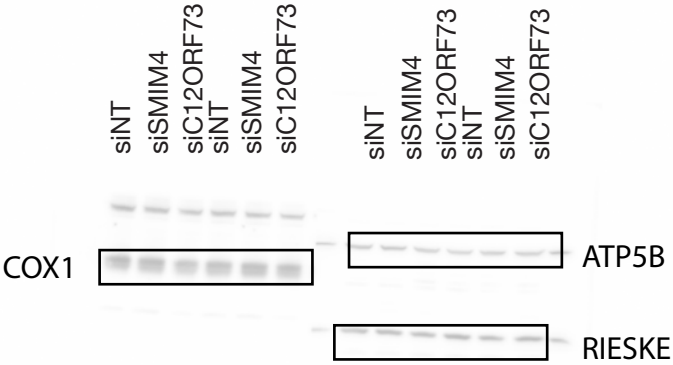

Glucose Galactose

Glucose Galactose

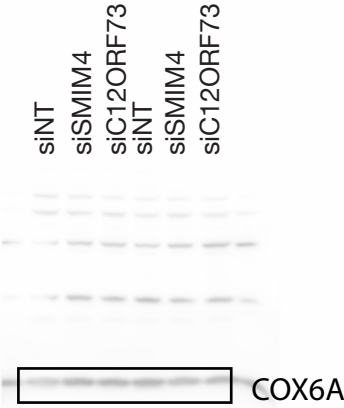

Glucose Galactose

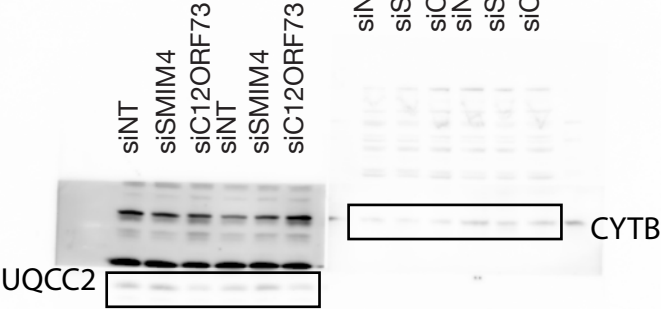

Figure 5 source data 2 related to Figure 5B

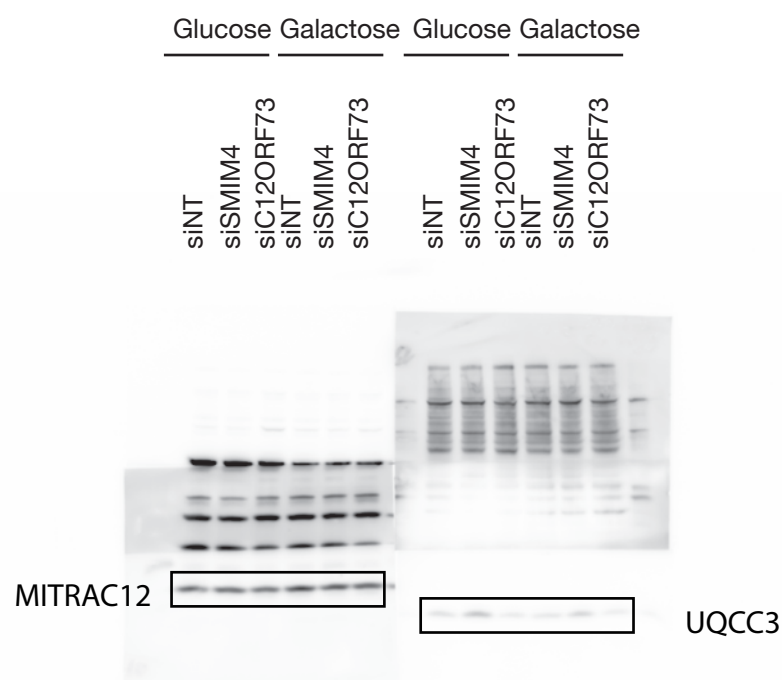

Supplement: fig5-data1 [file elife-68213-fig5-data1-v1.zip]
