# Supplementary material for: Defining the interactome of the human mitochondrial ribosome identifies SMIM4 and TMEM223 as respiratory chain assembly factors
Source: eLife journal article supplement (doi:10.7554/elife.68213), 2021-12-17

Figure 6 source data 4 related to Figure 6D

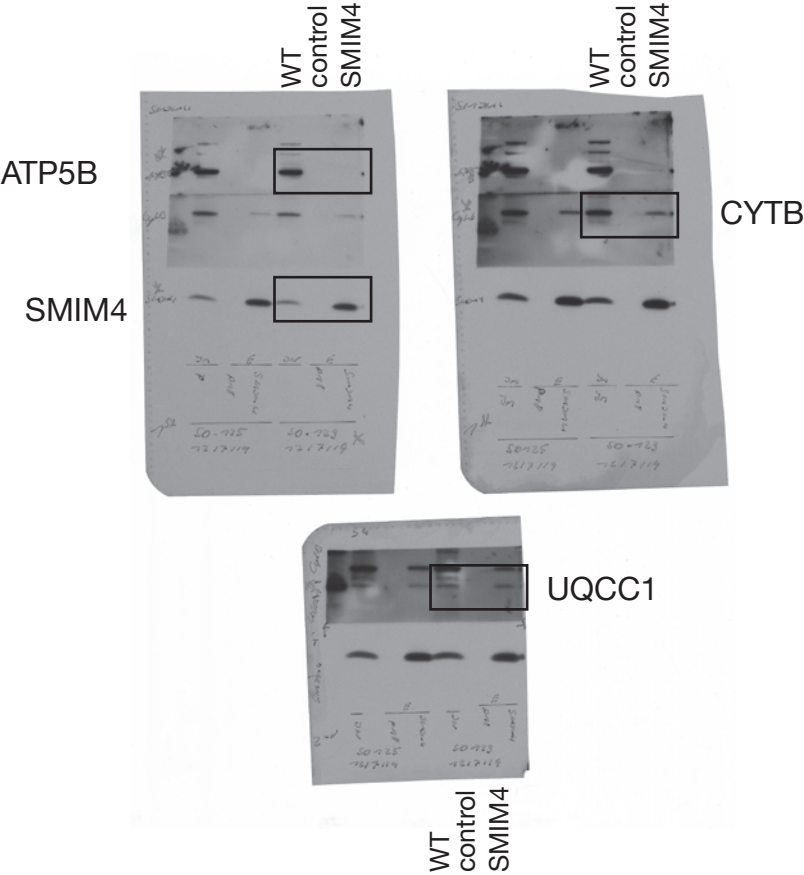

Western blot

<sup>35</sup>S labelling

Figure 6 source data 4 related to Figure 6D

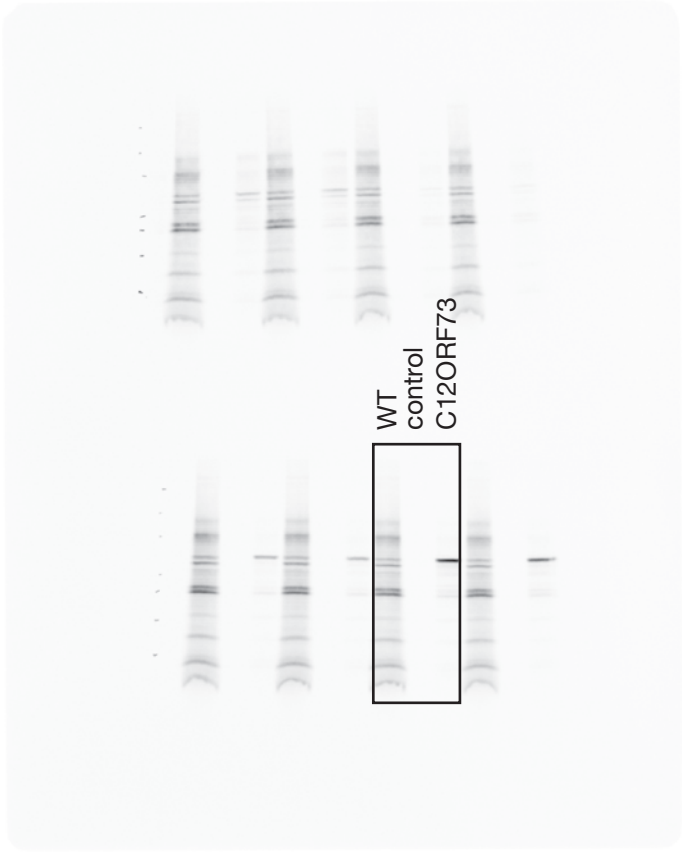

35S labelling

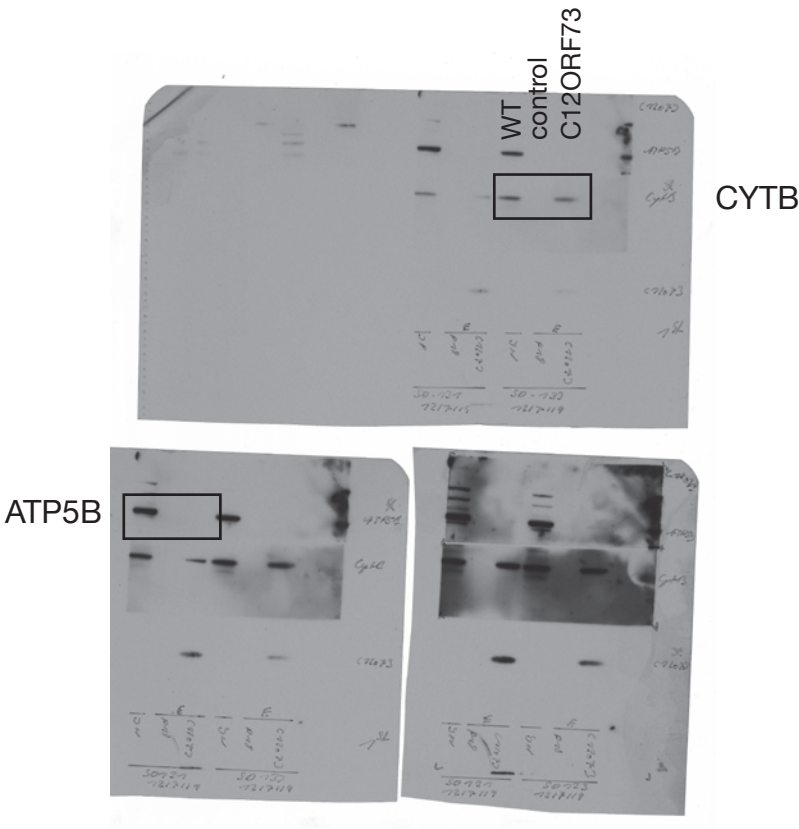

Western blot

Figure 6 source data 4 related to Figure 6D

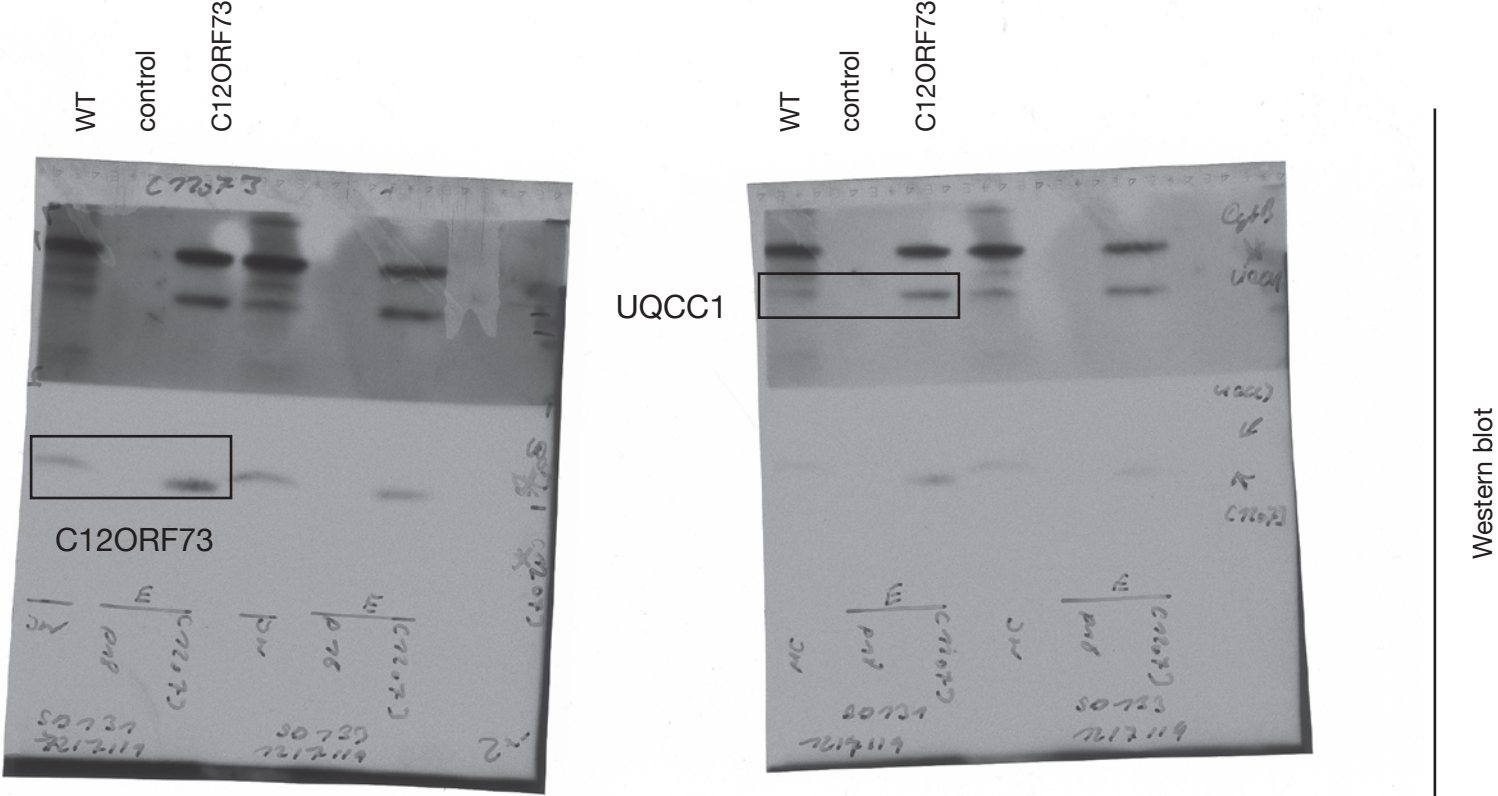

Supplement: fig6-data1 [file elife-68213-fig6-data1-v1.zip]
