# Supplementary material for: Defining the interactome of the human mitochondrial ribosome identifies SMIM4 and TMEM223 as respiratory chain assembly factors
Source: eLife. 2021 Dec 31;10:e68213. doi: 10.7554/eLife.68213 (PMC8719881; doi:10.7554/eLife.68213)
Supplement: Figure 5—figure supplement 1—source data 1. [file elife-68213-fig5-figsupp1-data1.zip]

Archive with 51 entries (30 files):
- Figure_5_Supplement_1_source_data_1/
- Figure_5_Supplement_1_source_data_1/.DS_Store
- __MACOSX/
- __MACOSX/Figure_5_Supplement_1_source_data_1/
- __MACOSX/Figure_5_Supplement_1_source_data_1/._.DS_Store
- Figure_5_Supplement_1_source_data_1/Figure_5_Supplement_1_source_data_1_Figure_5_supplement_1B/
- Figure_5_Supplement_1_source_data_1/Figure_5_Supplement_1_source_data_1_Figure_5_supplement_1B/Data_labelled/
- Figure_5_Supplement_1_source_data_1/Figure_5_Supplement_1_source_data_1_Figure_5_supplement_1B/Data_labelled/Figure_5_supplement_1_source_data_1_related_Figure_5_supplement_1B.pdf
- __MACOSX/Figure_5_Supplement_1_source_data_1/Figure_5_Supplement_1_source_data_1_Figure_5_supplement_1B/
- __MACOSX/Figure_5_Supplement_1_source_data_1/Figure_5_Supplement_1_source_data_1_Figure_5_supplement_1B/Data_labelled/
- __MACOSX/Figure_5_Supplement_1_source_data_1/Figure_5_Supplement_1_source_data_1_Figure_5_supplement_1B/Data_labelled/._Figure_5_supplement_1_source_data_1_related_Figure_5_supplement_1B.pdf
- Figure_5_Supplement_1_source_data_1/Figure_5_Supplement_1_source_data_1_Figure_5_supplement_1B/.DS_Store
- __MACOSX/Figure_5_Supplement_1_source_data_1/Figure_5_Supplement_1_source_data_1_Figure_5_supplement_1B/._.DS_Store
- Figure_5_Supplement_1_source_data_1/Figure_5_Supplement_1_source_data_1_Figure_5_supplement_1B/Original_data/
- Figure_5_Supplement_1_source_data_1/Figure_5_Supplement_1_source_data_1_Figure_5_supplement_1B/Original_data/2004.jpg
- __MACOSX/Figure_5_Supplement_1_source_data_1/Figure_5_Supplement_1_source_data_1_Figure_5_supplement_1B/Original_data/
- __MACOSX/Figure_5_Supplement_1_source_data_1/Figure_5_Supplement_1_source_data_1_Figure_5_supplement_1B/Original_data/._2004.jpg
- Figure_5_Supplement_1_source_data_1/Figure_5_Supplement_1_source_data_1_Figure_5_supplement_1B/Original_data/1003.jpg
- __MACOSX/Figure_5_Supplement_1_source_data_1/Figure_5_Supplement_1_source_data_1_Figure_5_supplement_1B/Original_data/._1003.jpg
- Figure_5_Supplement_1_source_data_1/Figure_5_supplement_1_source_data_3_Figure_5_supplement_1D/
- Figure_5_Supplement_1_source_data_1/Figure_5_supplement_1_source_data_3_Figure_5_supplement_1D/Data_labelled/
- Figure_5_Supplement_1_source_data_1/Figure_5_supplement_1_source_data_3_Figure_5_supplement_1D/Data_labelled/Figure_5_supplement_1_source_data_3_related_Figure_5_supplement_1D.pdf
- __MACOSX/Figure_5_Supplement_1_source_data_1/Figure_5_supplement_1_source_data_3_Figure_5_supplement_1D/
- __MACOSX/Figure_5_Supplement_1_source_data_1/Figure_5_supplement_1_source_data_3_Figure_5_supplement_1D/Data_labelled/
- __MACOSX/Figure_5_Supplement_1_source_data_1/Figure_5_supplement_1_source_data_3_Figure_5_supplement_1D/Data_labelled/._Figure_5_supplement_1_source_data_3_related_Figure_5_supplement_1D.pdf
- Figure_5_Supplement_1_source_data_1/Figure_5_supplement_1_source_data_3_Figure_5_supplement_1D/Original_data/
- Figure_5_Supplement_1_source_data_1/Figure_5_supplement_1_source_data_3_Figure_5_supplement_1D/Original_data/2nd expo 20210618_102121-01_Ch_Chemi.jpg
- __MACOSX/Figure_5_Supplement_1_source_data_1/Figure_5_supplement_1_source_data_3_Figure_5_supplement_1D/Original_data/
- __MACOSX/Figure_5_Supplement_1_source_data_1/Figure_5_supplement_1_source_data_3_Figure_5_supplement_1D/Original_data/._2nd expo 20210618_102121-01_Ch_Chemi.jpg
- Figure_5_Supplement_1_source_data_1/Figure_5_supplement_1_source_data_3_Figure_5_supplement_1D/Original_data/1st 20210617_161720-20_Ch_Chemi.jpg
- __MACOSX/Figure_5_Supplement_1_source_data_1/Figure_5_supplement_1_source_data_3_Figure_5_supplement_1D/Original_data/._1st 20210617_161720-20_Ch_Chemi.jpg
- Figure_5_Supplement_1_source_data_1/Figure_5_supplement_1_source_data_3_Figure_5_supplement_1D/.DS_Store
- __MACOSX/Figure_5_Supplement_1_source_data_1/Figure_5_supplement_1_source_data_3_Figure_5_supplement_1D/._.DS_Store
- Figure_5_Supplement_1_source_data_1/Figure_5_supplement_1_source_data_2_Figure_5_supplement_1C/
- Figure_5_Supplement_1_source_data_1/Figure_5_supplement_1_source_data_2_Figure_5_supplement_1C/.DS_Store
- __MACOSX/Figure_5_Supplement_1_source_data_1/Figure_5_supplement_1_source_data_2_Figure_5_supplement_1C/
- __MACOSX/Figure_5_Supplement_1_source_data_1/Figure_5_supplement_1_source_data_2_Figure_5_supplement_1C/._.DS_Store
- Figure_5_Supplement_1_source_data_1/Figure_5_supplement_1_source_data_2_Figure_5_supplement_1C/Data_labelled/
- Figure_5_Supplement_1_source_data_1/Figure_5_supplement_1_source_data_2_Figure_5_supplement_1C/Data_labelled/Figure_5_supplement_1_source_data_2_Figure_5_supplement_1C.pdf
- __MACOSX/Figure_5_Supplement_1_source_data_1/Figure_5_supplement_1_source_data_2_Figure_5_supplement_1C/Data_labelled/
- __MACOSX/Figure_5_Supplement_1_source_data_1/Figure_5_supplement_1_source_data_2_Figure_5_supplement_1C/Data_labelled/._Figure_5_supplement_1_source_data_2_Figure_5_supplement_1C.pdf
- Figure_5_Supplement_1_source_data_1/Figure_5_supplement_1_source_data_2_Figure_5_supplement_1C/Original_files /
- Figure_5_Supplement_1_source_data_1/Figure_5_supplement_1_source_data_2_Figure_5_supplement_1C/Original_files /SWELLING005.jpg
- __MACOSX/Figure_5_Supplement_1_source_data_1/Figure_5_supplement_1_source_data_2_Figure_5_supplement_1C/Original_files /
- __MACOSX/Figure_5_Supplement_1_source_data_1/Figure_5_supplement_1_source_data_2_Figure_5_supplement_1C/Original_files /._SWELLING005.jpg
- Figure_5_Supplement_1_source_data_1/Figure_5_supplement_1_source_data_2_Figure_5_supplement_1C/Original_files /SWELLING002.jpg
- __MACOSX/Figure_5_Supplement_1_source_data_1/Figure_5_supplement_1_source_data_2_Figure_5_supplement_1C/Original_files /._SWELLING002.jpg
- Figure_5_Supplement_1_source_data_1/Figure_5_supplement_1_source_data_2_Figure_5_supplement_1C/Original_files /SWELLING003.jpg
- __MACOSX/Figure_5_Supplement_1_source_data_1/Figure_5_supplement_1_source_data_2_Figure_5_supplement_1C/Original_files /._SWELLING003.jpg
- Figure_5_Supplement_1_source_data_1/Figure_5_supplement_1_source_data_2_Figure_5_supplement_1C/Original_files /SWELLING001.jpg
- __MACOSX/Figure_5_Supplement_1_source_data_1/Figure_5_supplement_1_source_data_2_Figure_5_supplement_1C/Original_files /._SWELLING001.jpg
