# Supplementary material for: Defining the interactome of the human mitochondrial ribosome identifies SMIM4 and TMEM223 as respiratory chain assembly factors
Source: eLife. 2021 Dec 31;10:e68213. doi: 10.7554/eLife.68213 (PMC8719881; doi:10.7554/eLife.68213)
Supplement: Supplementary file 1. — Isolated complexes of mL62FLAG (Supplementary file 1) or from SMIM4FLAG (Supplementary file 2) were subjected to quantitative mass spectrometric analyses (compare Figures 1B and 4E). MS raw data were analyzed with MaxQuant/Andromeda (see Materials and methods section). Analyzed datasets are presented as Excel files. [file elife-68213-supp1.xlsx]

## Sheet: Table S1_mL62 SILAC-IPs
										Data Determined Across Replicates 1 - 4								Replicate 1									Replicate 2									Replicate 3									Replicate 4
	Protein Group ID	Protein IDs	Gene Names	Protein Names	Fasta Headers	Molecular Weight [kDa]	Posterior Error Probability	# of Proteins in Protein Group	Mitochondrial Ribosomal Subunit (small/large SU)	Enrichment Factor	Mean Log10 Ratio mL62/WT	P-value	-Log10 p-value	Sequence Coverage [%]	Peptides	Unique Peptides	Ratio mL62/WT	Ratio Variability [%]	Ratio Counts	Intensity	Intensity L	Intensity H	Sequence Coverage [%]	Peptides	Unique Peptides	Ratio mL62/WT	Ratio Variability [%]	Ratio Counts	Intensity	Intensity L	Intensity H	Sequence Coverage [%]	Peptides	Unique Peptides	Ratio mL62/WT	Ratio Variability [%]	Ratio Counts	Intensity	Intensity L	Intensity H	Sequence Coverage [%]	Peptides	Unique Peptides	Ratio mL62/WT	Ratio Variability [%]	Ratio Counts	Intensity	Intensity L	Intensity H
	839	Q8TCC3;Q8TCC3-2;Q8TCC3-3;B8ZZV5	MRPL30	39S ribosomal protein L30, mitochondrial	>sp|Q8TCC3|RM30_HUMAN 39S ribosomal protein L30, mitochondrial OS=Homo sapiens GN=MRPL30 PE=1 SV=1;>sp|Q8TCC3-2|RM30_HUMAN Isoform 2 of 39S ribosomal protein L30, mitochondrial OS=Homo sapiens GN=MRPL30;>sp|Q8TCC3-3|RM30_HUMAN Isoform 3 of 39S ribosomal pr	18.546	1.1193e-129	4	large SU	34.4053	1.53663	3.77746e-05	4.4228	34.8	6	6	27.498	97.997	22	250470000	6119500	244350000	38.5	6	6	29.033	99.157	25	370840000	9220500	361620000	33.5	6	6	43.6186	122.94	28	199920000	195410000	4510300	33.5	6	6	40.2382	124.15	30	289490000	281830000	7656800
	953	Q9H9J2	MRPL44	39S ribosomal protein L44, mitochondrial	>sp|Q9H9J2|RM44_HUMAN 39S ribosomal protein L44, mitochondrial OS=Homo sapiens GN=MRPL44 PE=1 SV=1	37.535	0	1	large SU	30.5743	1.48536	0.000157867	3.80171	49.7	21	21	26.118	142.8	92	2121900000	73511000	2048400000	49.1	21	21	20.012	129.23	139	3140800000	112880000	3027900000	54.5	24	24	44.5295	129.96	109	1714600000	1677700000	36882000	54.5	25	25	37.5446	116.19	104	2541400000	2485200000	56203000
	577	P52815	MRPL12	39S ribosomal protein L12, mitochondrial	>sp|P52815|RM12_HUMAN 39S ribosomal protein L12, mitochondrial OS=Homo sapiens GN=MRPL12 PE=1 SV=2	21.348	4.3855e-212	1	large SU	30.3017	1.48147	0.000296469	3.52802	68.7	12	1	21.582	NaN	1	4826300	223440	4602900	47.5	11	2	24.383	NaN	1	3291700	105740	3186000	51.5	13	2	57.5937	NaN	1	3342200	3267000	75217	50	11	1	27.8172	NaN	1	4496700	4388500	108240
	816	Q8IXM3	MRPL41	39S ribosomal protein L41, mitochondrial	>sp|Q8IXM3|RM41_HUMAN 39S ribosomal protein L41, mitochondrial OS=Homo sapiens GN=MRPL41 PE=1 SV=1	15.383	1.0313e-168	1	large SU	27.8291	1.4445	0.000229636	3.63896	68.6	10	10	23.072	130.49	16	478760000	20077000	458680000	68.6	11	11	17.355	147.09	31	1341900000	55303000	1286600000	68.6	11	11	39.3499	72.557	18	398450000	388690000	9757900	68.6	11	11	38.0662	75.7	16	971130000	946240000	24886000
	830	Q8NBN7;Q8NBN7-2;G8JLA1;K7EMY5;K7EQB5;K7ERV1	RDH13	Retinol dehydrogenase 13	>sp|Q8NBN7|RDH13_HUMAN Retinol dehydrogenase 13 OS=Homo sapiens GN=RDH13 PE=1 SV=2;>sp|Q8NBN7-2|RDH13_HUMAN Isoform 2 of Retinol dehydrogenase 13 OS=Homo sapiens GN=RDH13;>tr|G8JLA1|G8JLA1_HUMAN Retinol dehydrogenase 13 OS=Homo sapiens GN=RDH13 PE=1 SV=1	35.932	1.2945e-199	6		27.4577	1.43866	0.000379699	3.42056	61	15	15	16.657	123.96	15	47908000	2499700	45408000	61.6	15	15	20.453	98.068	15	53596000	2035100	51561000	63.1	19	19	41.58	123.37	16	58740000	53927000	4812900	54.4	15	15	40.1252	196.03	14	69332000	60544000	8787800
	944	Q9H4K7;Q5JXJ0;E7EU10;B4DR85;B4DRC1	GTPBP5	GTP-binding protein 5	>sp|Q9H4K7|MTG2_HUMAN Mitochondrial ribosome-associated GTPase 2 OS=Homo sapiens GN=MTG2 PE=1 SV=1;>tr|Q5JXJ0|Q5JXJ0_HUMAN Mitochondrial ribosome-associated GTPase 2 (Fragment) OS=Homo sapiens GN=MTG2 PE=4 SV=1;>tr|E7EU10|E7EU10_HUMAN Mitochondrial ribosom	43.955	3.3445e-287	5		27.4116	1.43793	0.00311846	2.50606	47.8	13	13	20.329	133.49	13	36444000	4491800	31952000	45.6	14	14	16.414	100.92	11	42042000	3145700	38897000	36.7	13	13	114.171	185.8	9	24682000	24323000	359130	33	11	11	14.8201	169.07	10	35580000	34934000	645540
	922	Q9BYC8;H7BZU9;B3KQX1	MRPL32	39S ribosomal protein L32, mitochondrial	>sp|Q9BYC8|RM32_HUMAN 39S ribosomal protein L32, mitochondrial OS=Homo sapiens GN=MRPL32 PE=1 SV=1	21.405	0	3	large SU	27.3249	1.43656	8.21032e-05	4.08564	42.6	13	13	21.981	121.32	35	344970000	31551000	313420000	42.6	12	12	21.808	113.48	26	840630000	22645000	817990000	42.6	12	12	30.0003	135.32	37	334800000	327000000	7802600	46.3	13	13	38.7657	109.04	43	713880000	696140000	17740000
	11	J3KPP0;Q9Y6G3;A6NCI0;S4R360;S4R2Z7	MRPL42	39S ribosomal protein L42, mitochondrial	>tr|J3KPP0|J3KPP0_HUMAN 39S ribosomal protein L42, mitochondrial OS=Homo sapiens GN=MRPL42 PE=1 SV=1;>sp|Q9Y6G3|RM42_HUMAN 39S ribosomal protein L42, mitochondrial OS=Homo sapiens GN=MRPL42 PE=1 SV=1;>tr|A6NCI0|A6NCI0_HUMAN 39S ribosomal protein L42, mitoc	16.204	1.7414e-108	5	large SU	26.6255	1.4253	0.00076662	3.11542	41.7	6	6	11.45	127.45	11	39710000	1960000	37750000	41.7	7	7	27.251	103.13	15	102960000	3535300	99420000	47.5	7	7	41.0863	91.842	12	58237000	57144000	1093600	47.5	6	6	39.2019	83.628	14	100780000	98725000	2058500
	981	Q9NX20;E9PI14	MRPL16	39S ribosomal protein L16, mitochondrial	>sp|Q9NX20|RM16_HUMAN 39S ribosomal protein L16, mitochondrial OS=Homo sapiens GN=MRPL16 PE=1 SV=1	28.449	2.5192e-231	2	large SU	25.8823	1.413	0.00024445	3.61181	56.6	14	14	18.902	119.18	44	707940000	24667000	683270000	55.8	14	14	18.743	134.94	57	692890000	25656000	667240000	56.6	15	15	29.4083	124.97	40	651360000	638060000	13300000	56.6	15	15	43.0719	140.58	48	1141700000	1117900000	23805000
	906	Q9BRJ2;J3QSH3;J3KSS2;J3KT99	MRPL45	39S ribosomal protein L45, mitochondrial	>sp|Q9BRJ2|RM45_HUMAN 39S ribosomal protein L45, mitochondrial OS=Homo sapiens GN=MRPL45 PE=1 SV=2	35.351	0	4	large SU	25.8333	1.41218	0.000281786	3.55008	71.2	25	25	19	130.04	74	1594600000	65482000	1529100000	79.4	26	26	17.279	145.18	77	2331900000	98264000	2233600000	76.5	28	28	35.1667	152.37	72	1492800000	1445200000	47595000	77.5	26	26	38.5758	126.95	79	2100200000	2047800000	52471000
	930	Q9BZE1;S4R369;A6NHR2;H0Y4J2	MRPL37	39S ribosomal protein L37, mitochondrial	>sp|Q9BZE1|RM37_HUMAN 39S ribosomal protein L37, mitochondrial OS=Homo sapiens GN=MRPL37 PE=1 SV=2;>tr|S4R369|S4R369_HUMAN 39S ribosomal protein L37, mitochondrial OS=Homo sapiens GN=MRPL37 PE=1 SV=1	48.117	0	4	large SU	25.8297	1.41212	0.00038183	3.41813	81.8	36	36	17.332	155.28	103	2168600000	98519000	2070100000	81.8	36	36	17.409	137.68	164	4085800000	177610000	3908200000	77.8	39	39	39.4664	130.73	112	2063100000	2018100000	44974000	81.3	38	38	37.379	149.65	106	3430800000	3324700000	106100000
	927	Q9BYD6;H0Y8N7;H0YAB5	MRPL1	39S ribosomal protein L1, mitochondrial	>sp|Q9BYD6|RM01_HUMAN 39S ribosomal protein L1, mitochondrial OS=Homo sapiens GN=MRPL1 PE=1 SV=2;>tr|H0Y8N7|H0Y8N7_HUMAN 39S ribosomal protein L1, mitochondrial (Fragment) OS=Homo sapiens GN=MRPL1 PE=1 SV=1	36.908	0	3	large SU	25.7253	1.41036	5.24023e-05	4.28065	62.2	23	23	19.879	133.88	71	1784900000	69386000	1715600000	59.4	24	24	22.396	113.71	135	1924500000	76767000	1847800000	65.8	23	23	33.1565	157.72	74	1092700000	1056300000	36433000	62.2	24	24	29.6692	139.84	81	2441300000	2370100000	71174000
	686	Q13405;H0YDP7;E9PNF1;E9PI78	MRPL49	39S ribosomal protein L49, mitochondrial	>sp|Q13405|RM49_HUMAN 39S ribosomal protein L49, mitochondrial OS=Homo sapiens GN=MRPL49 PE=1 SV=1;>tr|H0YDP7|H0YDP7_HUMAN 39S ribosomal protein L49, mitochondrial (Fragment) OS=Homo sapiens GN=MRPL49 PE=1 SV=1	19.198	8.3473e-155	4	large SU	25.7165	1.41021	0.000652244	3.18559	68.7	17	17	14.856	164.4	29	1603100000	63808000	1539300000	68.7	15	15	17.482	146.89	32	1526400000	60864000	1465600000	60.8	14	14	39.8042	132.59	38	923930000	903420000	20506000	61.4	12	12	42.3083	121.03	36	2015000000	1963600000	51396000
	964	Q9NP92	MRPS30	28S ribosomal protein S30, mitochondrial	>sp|Q9NP92|RT30_HUMAN 28S ribosomal protein S30, mitochondrial OS=Homo sapiens GN=MRPS30 PE=1 SV=2	50.364	0	1	large SU	25.5986	1.40822	0.000304628	3.51623	51.9	24	24	17.518	140.29	95	1309100000	54923000	1254200000	59.7	28	28	18.368	132.47	121	2925900000	119380000	2806500000	57.6	28	28	39.4291	111.57	113	1586600000	1550100000	36518000	57.6	28	28	33.8455	128.42	112	2265800000	2200200000	65522000
	680	Q13084;Q4TT38;A2IDC6;Q4TT37;A2IDC7	MRPL28	39S ribosomal protein L28, mitochondrial	>sp|Q13084|RM28_HUMAN 39S ribosomal protein L28, mitochondrial OS=Homo sapiens GN=MRPL28 PE=1 SV=4;>tr|Q4TT38|Q4TT38_HUMAN 39S ribosomal protein L28, mitochondrial OS=Homo sapiens GN=MRPL28 PE=1 SV=1;>tr|A2IDC6|A2IDC6_HUMAN 39S ribosomal protein L28, mitoc	30.156	0	5	large SU	25.5236	1.40694	0.000255388	3.5928	71.5	20	20	15.839	129.37	47	1231300000	42525000	1188800000	82.8	26	26	21.377	108.87	117	1116600000	41572000	1075000000	86.7	30	30	36.9303	163.46	56	1237100000	1164600000	72469000	85.9	28	28	33.9397	122.75	64	1540900000	1489600000	51272000
	296	Q9BQ48;M0R226	MRPL34	39S ribosomal protein L34, mitochondrial;Ribosomal protein L34	>sp|Q9BQ48|RM34_HUMAN 39S ribosomal protein L34, mitochondrial OS=Homo sapiens GN=MRPL34 PE=1 SV=1;>tr|M0R226|M0R226_HUMAN Ribosomal protein L34 OS=Homo sapiens GN=MRPL34 PE=1 SV=1	10.165	5.739e-20	2	large SU	25.3599	1.40415	0.000444304	3.35232	26.1	2	2	15.278	67.347	2	3590700	175820	3414800	26.1	4	4	21.96	115.87	7	46971000	2353000	44618000	26.1	4	4	48.2369	72.493	5	23206000	22714000	491830	25	2	2	25.5571	200.39	3	12031000	11664000	366650
	766	Q6P1L8	MRPL14	39S ribosomal protein L14, mitochondrial	>sp|Q6P1L8|RM14_HUMAN 39S ribosomal protein L14, mitochondrial OS=Homo sapiens GN=MRPL14 PE=1 SV=1	15.947	1.0131e-174	1	large SU	25.2129	1.40162	0.000310964	3.50729	56.6	9	9	17.781	118.93	23	349280000	16447000	332830000	56.6	9	9	17.489	122.6	23	1143200000	50224000	1092900000	64.1	12	12	40.7947	68.764	22	588180000	577030000	11149000	64.1	12	12	31.8542	79.139	23	659780000	645700000	14085000
	993	Q9P015;E5RHF4;E5RIZ4	MRPL15	39S ribosomal protein L15, mitochondrial	>sp|Q9P015|RM15_HUMAN 39S ribosomal protein L15, mitochondrial OS=Homo sapiens GN=MRPL15 PE=1 SV=1	33.419	0	3	large SU	24.8201	1.3948	0.000586206	3.23195	70.6	26	26	14.897	136.35	135	1734500000	78095000	1656400000	73.6	26	26	16.916	137.02	150	2562300000	114060000	2448200000	73.6	29	29	36.5377	109.11	151	1845600000	1805200000	40435000	73.6	28	28	41.2167	109.07	148	3326100000	3252600000	73527000
	701	Q14197;J3KS15	ICT1	Peptidyl-tRNA hydrolase ICT1, mitochondrial	>sp|Q14197|ICT1_HUMAN Peptidyl-tRNA hydrolase ICT1, mitochondrial OS=Homo sapiens GN=ICT1 PE=1 SV=1;>tr|J3KS15|J3KS15_HUMAN Peptidyl-tRNA hydrolase ICT1, mitochondrial (Fragment) OS=Homo sapiens GN=ICT1 PE=1 SV=1	23.63	0	2	large SU	24.6781	1.39231	0.00043438	3.36213	68	22	19	14.05	154.99	143	31611000000	1212500000	30399000000	74.8	25	20	19.969	154.99	188	37677000000	1476700000	36200000000	78.6	31	26	39.7947	181.53	150	25705000000	25617000000	88570000	73.3	29	25	33.2193	178.56	131	31842000000	31692000000	150630000
	868	Q96CB9;Q96CB9-4;Q96CB9-3;Q96CB9-2;M0R1K5	NSUN4	5-methylcytosine rRNA methyltransferase NSUN4	>sp|Q96CB9|NSUN4_HUMAN 5-methylcytosine rRNA methyltransferase NSUN4 OS=Homo sapiens GN=NSUN4 PE=1 SV=2;>sp|Q96CB9-4|NSUN4_HUMAN Isoform 4 of 5-methylcytosine rRNA methyltransferase NSUN4 OS=Homo sapiens GN=NSUN4	43.088	0	5		24.4902	1.38899	6.43235e-05	4.19163	35.7	13	13	20.827	113.56	16	132180000	5091100	127090000	45.3	13	13	22.671	126.8	23	183520000	7793600	175730000	39.8	13	13	21.4027	116.82	15	75378000	73816000	1561900	34.6	11	11	35.5961	99.816	20	154600000	150730000	3865400
	559	P49406;S4R3W9;H7C2J0;S4R455	MRPL19	39S ribosomal protein L19, mitochondrial	>sp|P49406|RM19_HUMAN 39S ribosomal protein L19, mitochondrial OS=Homo sapiens GN=MRPL19 PE=1 SV=2;>tr|S4R3W9|S4R3W9_HUMAN 39S ribosomal protein L19, mitochondrial (Fragment) OS=Homo sapiens GN=MRPL19 PE=1 SV=1	33.535	3.6986e-298	4	large SU	23.7191	1.3751	0.000292577	3.53376	63.7	24	24	16.684	128.12	97	2889000000	136330000	2752700000	68.2	29	29	16.762	138.48	105	3130600000	142710000	2987900000	66.8	30	30	31.6146	117.2	103	1932600000	1883900000	48721000	70.5	29	29	35.7999	120.73	94	3180100000	3099000000	81092000
	800	Q86TS9-3;Q86TS9;G3V3U6;Q86TS9-2;G5E9P5	MRPL52	39S ribosomal protein L52, mitochondrial	>sp|Q86TS9-3|RM52_HUMAN Isoform 3 of 39S ribosomal protein L52, mitochondrial OS=Homo sapiens GN=MRPL52;>sp|Q86TS9|RM52_HUMAN 39S ribosomal protein L52, mitochondrial OS=Homo sapiens GN=MRPL52 PE=2 SV=2;>tr|G3V3U6|G3V3U6_HUMAN 39S ribosomal protein L52, mi	13.592	1.1528e-108	5	large SU	23.7074	1.37488	0.000421881	3.37481	50.8	3	3	16.931	106.35	3	15041000	551770	14489000	51.6	4	4	18.682	115.57	6	43419000	1713700	41706000	51.6	5	5	46.4662	162.98	6	30415000	29854000	561200	51.6	4	4	21.4929	54.603	4	37981000	37274000	707110
	986	Q9NYK5;Q9NYK5-2;C9JG87	MRPL39	39S ribosomal protein L39, mitochondrial	>sp|Q9NYK5|RM39_HUMAN 39S ribosomal protein L39, mitochondrial OS=Homo sapiens GN=MRPL39 PE=1 SV=3;>sp|Q9NYK5-2|RM39_HUMAN Isoform 2 of 39S ribosomal protein L39, mitochondrial OS=Homo sapiens GN=MRPL39;>tr|C9JG87|C9JG87_HUMAN 39S ribosomal protein L39, mi	38.711	0	3	large SU	23.5971	1.37286	0.000219387	3.65879	73.7	27	27	18.206	146.49	129	3573300000	134500000	3438800000	71.6	31	31	16.156	135.82	168	4676600000	185100000	4491500000	71	28	28	34.0623	117.3	147	3279300000	3200900000	78322000	72.2	28	28	30.9463	134.23	137	3596900000	3501400000	95449000
	924	Q9BYD1;E5RJI7;H0YAX3;E5RFI2	MRPL13	39S ribosomal protein L13, mitochondrial	>sp|Q9BYD1|RM13_HUMAN 39S ribosomal protein L13, mitochondrial OS=Homo sapiens GN=MRPL13 PE=1 SV=1;>tr|E5RJI7|E5RJI7_HUMAN 39S ribosomal protein L13, mitochondrial (Fragment) OS=Homo sapiens GN=MRPL13 PE=1 SV=2	20.692	7.4708e-216	4	large SU	22.8656	1.35918	0.000302287	3.51958	85.4	17	17	17.842	127.24	70	1822100000	79029000	1743100000	85.4	17	17	14.888	120.69	106	2530500000	101550000	2429000000	85.4	16	16	28.9009	125.24	74	2110500000	2064800000	45710000	85.4	14	14	35.6075	118.61	91	2298800000	2245300000	53449000
	864	Q96A35;X6RJ73;X6RHI2;X6RIR5	MRPL24	39S ribosomal protein L24, mitochondrial	>sp|Q96A35|RM24_HUMAN 39S ribosomal protein L24, mitochondrial OS=Homo sapiens GN=MRPL24 PE=1 SV=1;>tr|X6RJ73|X6RJ73_HUMAN 39S ribosomal protein L24, mitochondrial (Fragment) OS=Homo sapiens GN=MRPL24 PE=3 SV=1	24.915	2.9831e-170	4	large SU	22.6288	1.35466	0.000211641	3.6744	60.2	15	15	17.068	129.66	62	903620000	43048000	860570000	58.8	14	14	16.369	123.11	107	1224400000	62526000	1161900000	60.6	16	16	31.9939	121.99	75	1363900000	1326100000	37761000	63.4	16	16	29.3341	119.61	67	1203100000	1171000000	32105000
	969	Q9NRX2;E9PKV2	MRPL17	39S ribosomal protein L17, mitochondrial	>sp|Q9NRX2|RM17_HUMAN 39S ribosomal protein L17, mitochondrial OS=Homo sapiens GN=MRPL17 PE=1 SV=1;>tr|E9PKV2|E9PKV2_HUMAN 39S ribosomal protein L17, mitochondrial (Fragment) OS=Homo sapiens GN=MRPL17 PE=1 SV=1	20.05	4.5953e-227	2	large SU	22.6129	1.35436	0.000233292	3.6321	69.1	14	14	16.468	146.02	53	1264800000	67277000	1197500000	68	15	15	16.347	137.67	53	1206500000	63258000	1143200000	68	15	15	32.1699	95.731	50	711110000	692840000	18272000	61.1	12	12	30.1923	143.44	59	1228600000	1020600000	207970000
	275	J3QRF8	ICT1		>tr|J3QRF8|J3QRF8_HUMAN Peptidyl-tRNA hydrolase ICT1, mitochondrial (Fragment) OS=Homo sapiens GN=ICT1 PE=4 SV=1	8.013	7.1457e-89	1		22.1445	1.34527	0.000342752	3.46502	36.6	3	0			0	0	0	0	59.2	6	1	22.808	93.863	3	56196000	1980300	54216000	59.2	6	1	18.9147	117.7	4	38626000	38284000	341540	59.2	5	1	25.1718	61.304	3	25519000	24795000	724000
	793	Q7Z2W9;Q7Z2W9-2;F5H7V8;H3BUY0	MRPL21	39S ribosomal protein L21, mitochondrial	>sp|Q7Z2W9|RM21_HUMAN 39S ribosomal protein L21, mitochondrial OS=Homo sapiens GN=MRPL21 PE=1 SV=2;>sp|Q7Z2W9-2|RM21_HUMAN Isoform 2 of 39S ribosomal protein L21, mitochondrial OS=Homo sapiens GN=MRPL21;>tr|F5H7V8|F5H7V8_HUMAN 39S ribosomal protein L21, mi	22.814	3.9016e-261	4	large SU	22.1052	1.3445	0.000743824	3.12853	60	12	12	14.582	159.39	39	1039800000	59966000	979780000	60	12	12	14.284	154.48	40	1206400000	62713000	1143700000	66.8	12	12	25.6345	162.36	30	587970000	574040000	13926000	62	13	13	44.7187	119.56	42	892740000	871570000	21175000
	7	A4D1E9;A4D1E9-2;C9J8R7;C9JNI1;C9JEQ8;F8WBB5;A4D1E9-3;F8WBY0;F8WCN4	GTPBP10	GTP-binding protein 10	>sp|A4D1E9|GTPBA_HUMAN GTP-binding protein 10 OS=Homo sapiens GN=GTPBP10 PE=1 SV=1;>sp|A4D1E9-2|GTPBA_HUMAN Isoform 2 of GTP-binding protein 10 OS=Homo sapiens GN=GTPBP10;>tr|C9J8R7|C9J8R7_HUMAN GTP-binding protein 10 (Fragment) OS=Homo sapiens GN=GTPBP10	42.932	0	9		21.8266	1.33899	5.87111e-05	4.23128	54.3	20	20	16.943	90.193	23	195110000	6678300	188430000	54.3	21	21	19.447	99.648	32	361960000	12694000	349270000	59.7	21	21	24.0286	114.37	27	163210000	157620000	5589500	61.5	22	22	28.6664	110.3	23	261160000	252890000	8270900
	974	Q9NVS2;Q5QPA5;Q9NVS2-2;Q9NVS2-3	MRPS18A	28S ribosomal protein S18a, mitochondrial	>sp|Q9NVS2|RT18A_HUMAN 28S ribosomal protein S18a, mitochondrial OS=Homo sapiens GN=MRPS18A PE=1 SV=1;>tr|Q5QPA5|Q5QPA5_HUMAN 28S ribosomal protein S18a, mitochondrial (Fragment) OS=Homo sapiens GN=MRPS18A PE=1 SV=3;>sp|Q9NVS2-2|RT18A_HUMAN Isoform 2 of 28	22.184	2.6202e-173	4	large SU	21.5775	1.334	7.85362e-05	4.10493	46.9	12	12	18.149	155.01	43	583820000	24151000	559670000	55.6	14	14	17.655	155.07	49	878380000	33117000	845260000	58.7	14	14	21.8112	142.73	50	639710000	624270000	15443000	55.6	14	14	31.0174	121.54	67	816490000	792910000	23589000
	724	Q16540;A6NJD9;A8MVT4;A8MYK1;H7C2P7	MRPL23	39S ribosomal protein L23, mitochondrial	>sp|Q16540|RM23_HUMAN 39S ribosomal protein L23, mitochondrial OS=Homo sapiens GN=MRPL23 PE=1 SV=1;>tr|A6NJD9|A6NJD9_HUMAN 39S ribosomal protein L23, mitochondrial OS=Homo sapiens GN=MRPL23 PE=1 SV=1;>tr|A8MVT4|A8MVT4_HUMAN 39S ribosomal protein L23, mitoc	17.781	2.3254e-192	5	large SU	21.5348	1.33314	0.000395567	3.40278	69.9	10	10	16.095	122.9	18	767870000	41089000	726780000	62.1	8	8	14.356	105.3	19	797920000	38353000	759570000	62.1	8	8	24.3067	133.91	16	485800000	473920000	11880000	60.8	8	8	38.2922	94.29	22	979350000	956630000	22720000
	156	P09001;H0Y9G6;E7ETU7;D6RC14;E9PF06;D6RBQ5	MRPL3	39S ribosomal protein L3, mitochondrial	>sp|P09001|RM03_HUMAN 39S ribosomal protein L3, mitochondrial OS=Homo sapiens GN=MRPL3 PE=1 SV=1;>tr|H0Y9G6|H0Y9G6_HUMAN 39S ribosomal protein L3, mitochondrial (Fragment) OS=Homo sapiens GN=MRPL3 PE=1 SV=1;>tr|E7ETU7|E7ETU7_HUMAN 39S ribosomal protein L3,	38.632	0	6	large SU	21.4236	1.33089	0.000137883	3.86049	61.5	26	26	15.517	130.18	92	981320000	46337000	934990000	59.2	25	25	17.668	128.05	118	1238300000	57398000	1180900000	58.3	23	23	30.4655	140.43	83	935970000	908680000	27286000	58.3	23	23	25.2213	123.14	86	1335300000	1294800000	40552000
	344	O75394	MRPL33	39S ribosomal protein L33, mitochondrial	>sp|O75394|RM33_HUMAN 39S ribosomal protein L33, mitochondrial OS=Homo sapiens GN=MRPL33 PE=1 SV=1	7.6191	5.8462e-199	1	large SU	21.1911	1.32615	1.15545e-05	4.93725	56.9	6	6	19.059	59.55	10	140560000	5606600	134960000	67.7	7	7	20.043	73.368	15	263460000	10903000	252550000	64.6	6	6	20.4587	142.48	24	124010000	118750000	5265200	64.6	6	6	25.8031	112.03	28	322400000	312030000	10367000
	926	Q9BYD3;K7ES61;Q9BYD3-2;X6RAY8;K7ELQ0;K7EKI4;K7ELF1;K7EJ73	MRPL4	39S ribosomal protein L4, mitochondrial	>sp|Q9BYD3|RM04_HUMAN 39S ribosomal protein L4, mitochondrial OS=Homo sapiens GN=MRPL4 PE=1 SV=1;>tr|K7ES61|K7ES61_HUMAN 39S ribosomal protein L4, mitochondrial (Fragment) OS=Homo sapiens GN=MRPL4 PE=1 SV=1;>sp|Q9BYD3-2|RM04_HUMAN Isoform 2 of 39S ribosoma	34.919	0	8	large SU	20.7435	1.31688	0.000115284	3.93823	67.5	17	17	17.474	148.77	93	1439400000	105090000	1334300000	71.1	20	20	15.528	147.99	122	2575900000	143420000	2432400000	66.9	17	17	28.7134	122.28	113	1107200000	1049000000	58170000	66.9	18	18	23.7648	147.43	112	1736300000	1618300000	117980000
	925	Q9BYD2;Q5SZR1	MRPL9	39S ribosomal protein L9, mitochondrial	>sp|Q9BYD2|RM09_HUMAN 39S ribosomal protein L9, mitochondrial OS=Homo sapiens GN=MRPL9 PE=1 SV=2;>tr|Q5SZR1|Q5SZR1_HUMAN 39S ribosomal protein L9, mitochondrial OS=Homo sapiens GN=MRPL9 PE=1 SV=1	30.243	0	2	large SU	20.5038	1.31184	0.000338322	3.47067	52.4	17	17	15.059	139.39	48	1440200000	84777000	1355400000	54.3	17	17	13.685	93.8	49	1998800000	115700000	1883100000	52.1	15	15	27.8575	122.38	35	1423300000	1376700000	46618000	51.7	19	19	30.7863	102.17	50	1905900000	1850900000	55088000
	923	Q9BYC9;I3L2X1;B7Z746	MRPL20	39S ribosomal protein L20, mitochondrial	>sp|Q9BYC9|RM20_HUMAN 39S ribosomal protein L20, mitochondrial OS=Homo sapiens GN=MRPL20 PE=1 SV=1	17.442	1.2003e-173	3	large SU	20.4075	1.30979	0.000290135	3.5374	49	13	13	12.738	141.66	44	440640000	22165000	418470000	47	12	12	17.381	122.66	43	564920000	24287000	540630000	47	11	11	25.2468	125.74	40	382490000	373150000	9343900	46.3	12	12	31.0299	87.67	59	521030000	508590000	12440000
	795	Q7Z6M4;C9JNJ7;B4DFP7;B4DKD5;H7C316;H7C1N9;C9JX74;B5MBW3;E7EW93	MTERFD2	mTERF domain-containing protein 2	>sp|Q7Z6M4|MTEF4_HUMAN Transcription termination factor 4, mitochondrial OS=Homo sapiens GN=MTERF4 PE=1 SV=3;>tr|C9JNJ7|C9JNJ7_HUMAN mTERF domain-containing protein 2 (Fragment) OS=Homo sapiens GN=MTERFD2 PE=1 SV=1;>tr|B4DFP7|B4DFP7_HUMAN cDNA FLJ59868, hi	43.957	8.4371e-267	9		20.2851	1.30718	8.67901e-05	4.06153	49.3	24	24	17.579	118.28	40	244940000	7630200	237310000	46.7	21	21	19.24	104.34	41	208400000	7932900	200470000	47.8	21	21	16.8481	158.33	34	171550000	167340000	4217000	53.8	23	23	29.7141	106.19	39	317600000	312220000	5378700
	904	Q9BQC6	MRP63	Ribosomal protein 63, mitochondrial	>sp|Q9BQC6|RT63_HUMAN Ribosomal protein 63, mitochondrial OS=Homo sapiens GN=MRPL57 PE=1 SV=1	12.266	6.7482e-87	1	large SU	19.2573	1.28459	0.00286385	2.54305	42.2	4	4	6.1998	168.31	5	175450000	15215000	160230000	49	5	5	19.131	153.07	7	364100000	32494000	331610000	60.8	7	7	26.7423	170.31	9	148960000	145810000	3151300	60.8	8	8	43.3576	145.14	11	289700000	282830000	6870700
	153	Q9NWU5;E7ESL0;J3KQY1;Q9NWU5-2;Q9NWU5-3	MRPL22	39S ribosomal protein L22, mitochondrial	>sp|Q9NWU5|RM22_HUMAN 39S ribosomal protein L22, mitochondrial OS=Homo sapiens GN=MRPL22 PE=1 SV=1;>tr|E7ESL0|E7ESL0_HUMAN 39S ribosomal protein L22, mitochondrial OS=Homo sapiens GN=MRPL22 PE=1 SV=1;>tr|J3KQY1|J3KQY1_HUMAN 39S ribosomal protein L22, mitoc	23.64	8.4853e-152	5	large SU	18.9067	1.27662	0.000191756	3.71725	55.8	12	12	14.718	120.16	54	1056500000	52103000	1004400000	55.8	12	12	13.977	125.92	57	1543000000	80854000	1462100000	49	12	12	21.9375	127.01	62	1170700000	1135500000	35203000	47.6	11	11	28.315	140.03	62	1506300000	1458200000	48082000
	962	Q9HD33-2;Q9HD33;Q9HD33-3	MRPL47	39S ribosomal protein L47, mitochondrial	>sp|Q9HD33-2|RM47_HUMAN Isoform 2 of 39S ribosomal protein L47, mitochondrial OS=Homo sapiens GN=MRPL47;>sp|Q9HD33|RM47_HUMAN 39S ribosomal protein L47, mitochondrial OS=Homo sapiens GN=MRPL47 PE=1 SV=2;>sp|Q9HD33-3|RM47_HUMAN Isoform 3 of 39S ribosomal pr	27.085	5.024e-202	3	large SU	18.509	1.26738	0.000537935	3.26927	53	16	16	12.028	133.53	60	1247500000	58622000	1188800000	57	23	23	17.689	132.06	129	787750000	44084000	743670000	57.8	23	23	35.4296	136.01	64	1874200000	1825100000	49126000	49.1	14	14	15.5693	134.77	48	770090000	746530000	23562000
	878	Q96EL3;B9A051	MRPL53	39S ribosomal protein L53, mitochondrial	>sp|Q96EL3|RM53_HUMAN 39S ribosomal protein L53, mitochondrial OS=Homo sapiens GN=MRPL53 PE=1 SV=1	12.107	3.236e-223	2	large SU	18.3849	1.26446	0.000488855	3.31082	66.1	7	7	12.784	93.426	28	494260000	25038000	469220000	62.5	9	9	12.251	102	41	1157100000	56750000	1100300000	66.1	9	9	25.5571	106.01	31	399550000	387990000	11555000	75	8	8	28.5429	117.72	44	1030000000	999960000	29991000
	876	Q96EH3	MALSU1	Mitochondrial assembly of ribosomal large subunit protein 1	>sp|Q96EH3|MASU1_HUMAN Mitochondrial assembly of ribosomal large subunit protein 1 OS=Homo sapiens GN=MALSU1 PE=1 SV=1	26.17	5.9589e-137	1		18.1921	1.25988	4.60532e-05	4.33674	46.2	9	9	17.054	169.65	39	233330000	20282000	213050000	46.2	8	8	16.589	143.3	45	267290000	10893000	256390000	46.2	8	8	15.7801	187.88	37	187860000	180550000	7308500	34.6	6	6	24.5345	137.47	34	156200000	152640000	3561900
	956	Q9HBH1	PDF	Peptide deformylase, mitochondrial	>sp|Q9HBH1|DEFM_HUMAN Peptide deformylase, mitochondrial OS=Homo sapiens GN=PDF PE=1 SV=1	27.013	3.7169e-64	1		18.0421	1.25629	0.00018778	3.72635	21	4	4	14.159	40.094	7	103290000	6396500	96894000	28	5	5	13.084	76.459	5	49701000	3026800	46674000	37.4	6	6	24.8281	135.61	6	73468000	70026000	3442300	35.8	6	6	23.0372	96.655	7	77501000	73834000	3666800
	990	Q9NZE8;Q9NZE8-2;D3YTC1	MRPL35	39S ribosomal protein L35, mitochondrial	>sp|Q9NZE8|RM35_HUMAN 39S ribosomal protein L35, mitochondrial OS=Homo sapiens GN=MRPL35 PE=1 SV=3;>sp|Q9NZE8-2|RM35_HUMAN Isoform 2 of 39S ribosomal protein L35, mitochondrial OS=Homo sapiens GN=MRPL35;>tr|D3YTC1|D3YTC1_HUMAN 39S ribosomal protein L35, mi	21.514	1.4757e-16	3	large SU	17.7964	1.25033	0.000161581	3.79161	18.6	5	5	20.348	115.18	7	21132000	842720	20289000	14.9	5	5	18.841	104.48	11	42258000	1574500	40683000	18.6	5	5	11.5042	94.399	12	23717000	22905000	811220	18.6	5	5	22.7428	89.884	14	33716000	31927000	1789200
	752	Q5T653;C9IY40;C9JZW2;C9JZG7	MRPL2	39S ribosomal protein L2, mitochondrial	>sp|Q5T653|RM02_HUMAN 39S ribosomal protein L2, mitochondrial OS=Homo sapiens GN=MRPL2 PE=1 SV=2	33.3	6.7917e-144	4	large SU	17.4802	1.24255	0.000353403	3.45173	38.4	14	14	11.417	171.31	47	546420000	70588000	475830000	40.7	15	15	13.728	194.42	52	562650000	71995000	490660000	38.4	13	13	23.4039	129.15	52	322670000	310900000	11774000	38.4	13	13	25.4531	121.98	58	584910000	564920000	19989000
	971	Q9NUL7;B4E102	DDX28	Probable ATP-dependent RNA helicase DDX28	>sp|Q9NUL7|DDX28_HUMAN Probable ATP-dependent RNA helicase DDX28 OS=Homo sapiens GN=DDX28 PE=1 SV=2	59.58	0	2		15.9789	1.20355	3.33242e-05	4.47724	63.7	27	27	14.589	85.112	63	153870000	7352400	146520000	68.1	29	29	13.441	69.257	89	224950000	11783000	213170000	66.3	28	28	16.6364	118.4	79	139150000	128940000	10206000	65.4	27	27	19.9832	113.5	67	209890000	195610000	14281000
	1032	Q9Y3B7;Q9Y3B7-2;Q9Y3B7-3;E9PQB6;H0YCD5	MRPL11	39S ribosomal protein L11, mitochondrial	>sp|Q9Y3B7|RM11_HUMAN 39S ribosomal protein L11, mitochondrial OS=Homo sapiens GN=MRPL11 PE=1 SV=1;>sp|Q9Y3B7-2|RM11_HUMAN Isoform 2 of 39S ribosomal protein L11, mitochondrial OS=Homo sapiens GN=MRPL11;>sp|Q9Y3B7-3|RM11_HUMAN Isoform 3 of 39S ribosomal pr	20.683	3.5097e-225	5	large SU	15.9404	1.2025	1.23808e-06	5.90725	62.5	13	13	15.833	101.26	48	1973600000	73017000	1900600000	60.9	13	13	16.33	107.52	59	2159300000	89572000	2069700000	63.5	14	14	14.625	192.97	51	2002800000	1907500000	95238000	68.2	16	16	17.0745	246.04	42	1531600000	1420500000	111070000
	797	Q7Z7H8;Q7Z7H8-2	MRPL10	39S ribosomal protein L10, mitochondrial	>sp|Q7Z7H8|RM10_HUMAN 39S ribosomal protein L10, mitochondrial OS=Homo sapiens GN=MRPL10 PE=1 SV=3;>sp|Q7Z7H8-2|RM10_HUMAN Isoform 2 of 39S ribosomal protein L10, mitochondrial OS=Homo sapiens GN=MRPL10	29.282	5.587e-132	2	large SU	15.8253	1.19935	0.000172314	3.76368	41.8	9	9	10.776	116.83	33	425560000	19424000	406140000	40.2	9	9	14.849	100.94	36	566580000	37540000	529040000	41.8	9	9	21.5875	99.131	34	522300000	499510000	22784000	43.3	10	10	18.1574	159.68	33	659280000	581410000	77877000
	827	Q8N5N7;B7Z358	MRPL50	39S ribosomal protein L50, mitochondrial	>sp|Q8N5N7|RM50_HUMAN 39S ribosomal protein L50, mitochondrial OS=Homo sapiens GN=MRPL50 PE=1 SV=2;>tr|B7Z358|B7Z358_HUMAN 39S ribosomal protein L50, mitochondrial OS=Homo sapiens GN=MRPL50 PE=1 SV=1	18.325	0	2	large SU	15.5407	1.19147	0.00013858	3.8583	64.6	13	13	12.248	115.31	32	380640000	16433000	364210000	72.2	17	17	12.564	120.2	40	1023600000	42360000	981280000	73.4	18	18	21.9394	137.72	39	449860000	438320000	11541000	68.4	14	14	17.2768	123.71	32	712820000	693960000	18857000
	305	O14561;I3L505;H3BNK3	NDUFAB1	Acyl carrier protein, mitochondrial;Acyl carrier protein	>sp|O14561|ACPM_HUMAN Acyl carrier protein, mitochondrial OS=Homo sapiens GN=NDUFAB1 PE=1 SV=3;>tr|I3L505|I3L505_HUMAN Acyl carrier protein (Fragment) OS=Homo sapiens GN=NDUFAB1 PE=1 SV=1	17.417	4.0682e-24	3		15.4612	1.18924	0.000927492	3.03269	11.5	2	2	9.7454	1.8747	2	3025200	166240	2859000	21.2	4	4	11.06	100.89	10	18943000	950560	17992000	21.2	4	4	31.0414	64.157	4	17015000	16540000	475230	21.2	4	4	17.0794	89.596	8	33491000	32362000	1129000
	957	Q9HC36;I3L443;I3L0T6	RNMTL1	RNA methyltransferase-like protein 1	>sp|Q9HC36|RMTL1_HUMAN RNA methyltransferase-like protein 1 OS=Homo sapiens GN=RNMTL1 PE=1 SV=2;>tr|I3L443|I3L443_HUMAN RNA methyltransferase-like protein 1 (Fragment) OS=Homo sapiens GN=RNMTL1 PE=1 SV=1	47.019	9.173e-219	3		15	1.17609	7.27579e-05	4.13812	35.2	14	14	13.463	111.55	38	218310000	12211000	206100000	44.3	17	17	11.927	121.25	48	412900000	25614000	387290000	55.2	22	22	19.9338	83.737	43	256240000	234350000	21885000	42.6	18	18	15.816	102.65	37	249960000	236470000	13488000
	765	Q6P161	MRPL54	39S ribosomal protein L54, mitochondrial	>sp|Q6P161|RM54_HUMAN 39S ribosomal protein L54, mitochondrial OS=Homo sapiens GN=MRPL54 PE=1 SV=1	15.819	1.2752e-27	1	large SU	14.79	1.16997	0.000128416	3.89138	48.6	3	3	13.227	95.909	8	68174000	3744300	64430000	48.6	3	3	12.344	110.33	9	174890000	9652100	165240000	51.4	4	4	13.5461	143.67	16	122680000	119370000	3313300	51.4	4	4	21.6343	147.16	11	84736000	79353000	5382800
	838	Q8TAE8	GADD45GIP1	Growth arrest and DNA damage-inducible proteins-interacting protein 1	>sp|Q8TAE8|G45IP_HUMAN Growth arrest and DNA damage-inducible proteins-interacting protein 1 OS=Homo sapiens GN=GADD45GIP1 PE=1 SV=1	25.384	4.0291e-229	1	large SU	13.5985	1.13349	0.000193963	3.71228	55.9	11	11	10.468	137.42	31	795010000	38259000	756750000	55.9	11	11	11.289	106.82	49	1302400000	61401000	1241000000	56.8	11	11	14.622	137.51	39	895350000	844740000	50605000	56.8	12	12	19.7894	121.03	42	1119300000	1093500000	25776000
	262	Q15070-2;S4R3Q9;Q15070;J3KNA0;E7EVY0;C9JC63;Q15070-3	OXA1L	Mitochondrial inner membrane protein OXA1L	>sp|Q15070-2|OXA1L_HUMAN Isoform 2 of Mitochondrial inner membrane protein OXA1L OS=Homo sapiens GN=OXA1L;>tr|S4R3Q9|S4R3Q9_HUMAN Mitochondrial inner membrane protein OXA1L OS=Homo sapiens GN=OXA1L PE=1 SV=1;>sp|Q15070|OXA1L_HUMAN Mitochondrial inner membr	46.691	7.1289e-51	7		12.6676	1.10269	2.10984e-05	4.67575	16.9	7	7	11.728	95.05	19	116170000	7832900	108340000	30.5	13	13	12.51	98.319	35	177610000	12078000	165530000	26	13	13	15.4603	101.36	30	95782000	90690000	5091800	23.6	11	11	11.3522	149.82	25	137880000	126040000	11835000
	1	A0PJW6;G5EA27;H0YCK4	TMEM223	Transmembrane protein 223	>sp|A0PJW6|TM223_HUMAN Transmembrane protein 223 OS=Homo sapiens GN=TMEM223 PE=1 SV=1	22.049	3.0411e-14	3		11.9516	1.07743	0.00268219	2.57151	17.3	2	2	13.808	NaN	1	7546800	381740	7165000	21.8	3	3	4.8615	18.458	2	1580500	100720	1479800	21.8	3	3	11.9281	57.076	4	5815600	5678500	137110	17.3	2	2	25.4823	26.571	3	9338900	8985200	353670
	918	Q9BVV7;J3QRI1;J3KRJ3	TIMM21	Mitochondrial import inner membrane translocase subunit Tim21	>sp|Q9BVV7|TIM21_HUMAN Mitochondrial import inner membrane translocase subunit Tim21 OS=Homo sapiens GN=TIMM21 PE=1 SV=1	28.202	9.4203e-26	3		11.8158	1.07246	0.00106434	2.97292	14.9	4	4	9.424	123.79	4	7413100	629400	6783700	23.4	6	6	9.649	116.59	6	17908000	1597000	16311000	23.8	6	6	24.5182	145.03	6	12575000	12018000	557020	23.8	6	6	8.74279	269.11	7	29801000	14351000	15450000
	1024	Q9Y2R0;K7EPV0	COA3	Cytochrome c oxidase assembly protein 3 homolog, mitochondrial	>sp|Q9Y2R0|COA3_HUMAN Cytochrome c oxidase assembly factor 3 homolog, mitochondrial OS=Homo sapiens GN=COA3 PE=1 SV=1;>tr|K7EPV0|K7EPV0_HUMAN Cytochrome c oxidase assembly factor 3 homolog, mitochondrial OS=Homo sapiens GN=COA3 PE=1 SV=1	11.731	9.6812e-09	2		11.6222	1.06529	0.0163934	1.78533	9.4	1	1	17.141	NaN	1	3810700	287570	3523100	20.8	2	2	4.727	190.15	2	12029000	744000	11285000	11.3	1	1			0	82379	82379	0	20.8	3	3	19.375	123.77	2	9971700	9589700	381970
	738	Q53S58	TMEM177	Transmembrane protein 177	>sp|Q53S58|TM177_HUMAN Transmembrane protein 177 OS=Homo sapiens GN=TMEM177 PE=2 SV=1	33.76	2.5112e-14	1		11.3688	1.05571	0.00190134	2.72094	11.3	3	3	7.2835	121.97	3	2145400	183040	1962400	14.1	4	4	6.7214	168.72	4	4704500	838910	3865600	14.1	4	4	14.5849	125.52	4	3375000	3160100	214940	14.1	4	4	23.3967	23.423	2	4338500	4213500	124970
	722	Q16134-3;Q16134;D6RAD5	ETFDH	Electron transfer flavoprotein-ubiquinone oxidoreductase, mitochondrial	>sp|Q16134-3|ETFD_HUMAN Isoform 2 of Electron transfer flavoprotein-ubiquinone oxidoreductase, mitochondrial OS=Homo sapiens GN=ETFDH;>sp|Q16134|ETFD_HUMAN Electron transfer flavoprotein-ubiquinone oxidoreductase, mitochondrial OS=Homo sapiens GN=ETFDH PE=	62.824	1.8269e-11	3		11.2575	1.05144	0.0121085	1.91691	3.2	2	2	5.471	231.18	3	3478900	907060	2571900	1.2	1	1	12.773	102.03	5	41092000	1936800	39155000	5.1	3	3	20.4157	75.552	2	17638000	17305000	333500	2.1	1	1			0	91294	91294	0
	934	Q9H061;E9PI90;E9PIH8;Q9H061-2	TMEM126A	Transmembrane protein 126A	>sp|Q9H061|T126A_HUMAN Transmembrane protein 126A OS=Homo sapiens GN=TMEM126A PE=1 SV=1;>tr|E9PI90|E9PI90_HUMAN Transmembrane protein 126A OS=Homo sapiens GN=TMEM126A PE=1 SV=1	21.527	5.0923e-45	4		11.14	1.04688	0.00540157	2.26748	27.2	4	4	8.4131	107.14	4	4328700	447280	3881400	27.2	4	4	5.5502	105.52	5	4512500	479960	4032500	27.2	4	4	37.6223	229.33	3	3814900	3607700	207210	27.2	4	4	8.76655	79.313	4	4016200	3828400	187770
	995	Q9P0J6	MRPL36	39S ribosomal protein L36, mitochondrial	>sp|Q9P0J6|RM36_HUMAN 39S ribosomal protein L36, mitochondrial OS=Homo sapiens GN=MRPL36 PE=2 SV=1	11.784	2.9345e-06	1	large SU	11.1259	1.04634	0.00305007	2.51569	0	0	0			0	0	0	0	8.7	2	2	8.8651	NaN	1	5517200	341080	5176100	8.7	2	2	16.1988	129.49	5	13094000	11017000	2076600	8.7	2	2	9.59049	113.44	5	9559800	7809500	1750300
	873	Q96DV4;B3KN96	MRPL38	39S ribosomal protein L38, mitochondrial	>sp|Q96DV4|RM38_HUMAN 39S ribosomal protein L38, mitochondrial OS=Homo sapiens GN=MRPL38 PE=1 SV=2	44.596	0	2	large SU	10.4121	1.01754	0.000173576	3.76051	58.4	31	31	8.2066	127.84	128	2765800000	260740000	2505100000	58.2	27	27	8.6467	132.91	183	4134400000	383650000	3750800000	60.5	35	35	12.0569	69.754	140	2970100000	2764200000	205880000	60.8	34	34	13.7374	59.554	127	4661800000	4351800000	310060000
	937	Q9H0U6	MRPL18	39S ribosomal protein L18, mitochondrial	>sp|Q9H0U6|RM18_HUMAN 39S ribosomal protein L18, mitochondrial OS=Homo sapiens GN=MRPL18 PE=1 SV=1	20.576	7.0962e-128	1	large SU	10.2862	1.01225	0.000472378	3.32571	52.2	8	8	7.4351	128.87	26	930330000	93868000	836470000	56.7	9	9	7.783	128.63	31	1143900000	121280000	1022600000	56.7	10	10	13.4571	111.88	21	739410000	687310000	52101000	38.9	8	8	14.3757	78.183	33	1342200000	1254100000	88132000
	280	K7EJE8;K7EKE6;P36776-2;P36776;P36776-3;K7ER27;K7ERR6;K7ER56;K7EQF8	LONP1	Lon protease homolog, mitochondrial	>tr|K7EJE8|K7EJE8_HUMAN Lon protease homolog, mitochondrial OS=Homo sapiens GN=LONP1 PE=1 SV=1;>tr|K7EKE6|K7EKE6_HUMAN Lon protease homolog, mitochondrial OS=Homo sapiens GN=LONP1 PE=1 SV=1;>sp|P36776-2|LONM_HUMAN Isoform 2 of Lon protease homolog, mitocho	93.296	0	9		10.0509	1.0022	2.19543e-05	4.65848	46.8	37	37	9.0478	66.166	63	70777000	5275700	65501000	47.2	32	32	9.2611	57.021	49	58210000	4773000	53437000	47.4	33	33	12.0424	70.164	51	50616000	47100000	3515700	44.9	33	33	10.1134	91.419	52	90042000	81070000	8971900
	997	Q9P0M9;D6RAN8;H7C5U8;D6RE11;B3KN43	MRPL27	39S ribosomal protein L27, mitochondrial	>sp|Q9P0M9|RM27_HUMAN 39S ribosomal protein L27, mitochondrial OS=Homo sapiens GN=MRPL27 PE=1 SV=1;>tr|D6RAN8|D6RAN8_HUMAN 39S ribosomal protein L27, mitochondrial OS=Homo sapiens GN=MRPL27 PE=1 SV=1;>tr|H7C5U8|H7C5U8_HUMAN 39S ribosomal protein L27, mitoc	16.073	1.4964e-129	5	large SU	9.75683	0.989309	0.000172604	3.76295	52	9	9	7.8303	99.589	44	422620000	37092000	385530000	54.1	11	11	8.0615	116.86	52	862430000	78451000	783980000	54.1	10	10	12.9116	115.79	49	410190000	376270000	33921000	54.1	10	10	11.1189	65.909	59	728330000	679480000	48853000
	736	Q4U2R6;M0R176	MRPL51	39S ribosomal protein L51, mitochondrial	>sp|Q4U2R6|RM51_HUMAN 39S ribosomal protein L51, mitochondrial OS=Homo sapiens GN=MRPL51 PE=1 SV=1	15.095	2.9978e-80	2	large SU	9.19325	0.963469	0.00670471	2.17362	28.9	5	5	2.9476	148.55	12	46577000	4081300	42496000	37.5	7	7	9.3876	150.08	18	93491000	3910400	89581000	32	7	7	22.5836	117.78	16	50715000	49447000	1267900	36.7	7	7	11.4304	160.51	22	158770000	152560000	6203000
	817	Q8IYB8;B1AR60	SUPV3L1	ATP-dependent RNA helicase SUPV3L1, mitochondrial	>sp|Q8IYB8|SUV3_HUMAN ATP-dependent RNA helicase SUPV3L1, mitochondrial OS=Homo sapiens GN=SUPV3L1 PE=1 SV=1	87.99	1.9981e-304	2		9.15119	0.961478	0.000132828	3.87671	38.9	29	29	7.5844	59.733	53	75812000	8719000	67094000	44	32	32	7.5874	60.986	63	199190000	23525000	175670000	45	37	37	11.196	31.438	61	132490000	121410000	11076000	36.1	29	29	10.8852	65.261	47	178280000	162850000	15430000
	745	Q5RI15;Q5RI15-2	COX20	Cytochrome c oxidase protein 20 homolog	>sp|Q5RI15|COX20_HUMAN Cytochrome c oxidase protein 20 homolog OS=Homo sapiens GN=COX20 PE=1 SV=2;>sp|Q5RI15-2|COX20_HUMAN Isoform 2 of Cytochrome c oxidase protein 20 homolog OS=Homo sapiens GN=COX20	13.291	6.3796e-25	2		9.10602	0.959329	0.0243624	1.61328	11.9	1	1	3.3244	NaN	1	979230	164830	814400	22	2	2	13.896	227.46	2	2692400	233930	2458500	22	2	2			0	996320	945550	50776	22.9	2	2	16.3449	77.814	2	2655200	2458200	196940
	844	Q8WVI0	SMIM4	Small integral membrane protein 4	>sp|Q8WVI0|SMIM4_HUMAN Small integral membrane protein 4 OS=Homo sapiens GN=SMIM4 PE=1 SV=2	8.6961	6.8482e-13	1		8.90074	0.949426	0.00358072	2.44603	0	0	0			0	0	0	0	15.7	1	1	6.2275	NaN	1	2126100	233320	1892800	15.7	1	1	10.1617	NaN	1	783030	719390	63639	15.7	1	1	11.1429	NaN	1	2619400	2424500	194840
	867	Q96BP2;A6NJX6	CHCHD1	Coiled-coil-helix-coiled-coil-helix domain-containing protein 1	>sp|Q96BP2|CHCH1_HUMAN Coiled-coil-helix-coiled-coil-helix domain-containing protein 1 OS=Homo sapiens GN=CHCHD1 PE=1 SV=1;>tr|A6NJX6|A6NJX6_HUMAN Coiled-coil-helix-coiled-coil-helix domain-containing protein 1 OS=Homo sapiens GN=CHCHD1 PE=1 SV=1	13.475	4.3289e-120	2	small SU	8.71695	0.940365	3.57133e-05	4.44717	33.1	5	5	8.1201	75.78	5	131650000	15180000	116470000	57.6	8	8	7.4035	102.43	8	324310000	35306000	289000000	66.1	9	9	9.81836	89.617	10	149700000	135240000	14455000	64.4	9	9	9.78186	79.193	12	286950000	258590000	28361000
	1020	Q9Y291;C9JBY7	MRPS33	28S ribosomal protein S33, mitochondrial	>sp|Q9Y291|RT33_HUMAN 28S ribosomal protein S33, mitochondrial OS=Homo sapiens GN=MRPS33 PE=1 SV=1;>tr|C9JBY7|C9JBY7_HUMAN 28S ribosomal protein S33, mitochondrial OS=Homo sapiens GN=MRPS33 PE=1 SV=1	12.629	7.1548e-70	2	small SU	8.41302	0.924952	2.40558e-05	4.61878	36.8	6	6	7.5059	82.478	5	117770000	12866000	104900000	64.2	7	7	7.7121	104.12	8	219050000	23247000	195800000	45.3	6	6	8.94855	89.14	7	98381000	88128000	10253000	64.2	8	8	9.67118	67.846	12	200370000	179220000	21149000
	326	O43824;H7BYW4;H0Y2S1	GTPBP6	Putative GTP-binding protein 6	>sp|O43824|GTPB6_HUMAN Putative GTP-binding protein 6 OS=Homo sapiens GN=GTPBP6 PE=2 SV=3;>tr|H7BYW4|H7BYW4_HUMAN Putative GTP-binding protein 6 (Fragment) OS=Homo sapiens GN=GTPBP6 PE=4 SV=1;>tr|H0Y2S1|H0Y2S1_HUMAN Putative GTP-binding protein 6 OS=Homo s	56.883	1.3226e-22	3		8.40997	0.924794	0.000265393	3.57611	14.7	6	6	6.0778	42.567	5	2117200	194340	1922900	8.5	4	4	8.062	83.451	3	1249600	149300	1100300	10.5	5	5	8.94134	45.666	4	1509100	1397200	111900	8.9	4	4	11.4179	10.154	2	1938200	1847000	91219
	768	Q6P4A7;E9PGB5;Q6P4A7-3;Q6P4A7-2;B1AMV7;B1AMV8	SFXN4	Sideroflexin-4	>sp|Q6P4A7|SFXN4_HUMAN Sideroflexin-4 OS=Homo sapiens GN=SFXN4 PE=1 SV=1;>tr|E9PGB5|E9PGB5_HUMAN Sideroflexin-4 OS=Homo sapiens GN=SFXN4 PE=1 SV=1;>sp|Q6P4A7-3|SFXN4_HUMAN Isoform 3 of Sideroflexin-4 OS=Homo sapiens GN=SFXN4;>sp|Q6P4A7-2|SFXN4_HUMAN Isofor	37.998	3.0098e-70	6		8.37213	0.922836	0.000261469	3.58258	12.2	3	3	7.2115	83.088	2	1823800	146910	1676900	14.8	4	4	6.2487	56.953	3	2150600	226000	1924600	13.9	3	3	11.1729	NaN	1	1552400	1476300	76105	12.2	3	3	9.758	71.897	2	2134800	1994600	140200
	337	O75165	DNAJC13	DnaJ homolog subfamily C member 13	>sp|O75165|DJC13_HUMAN DnaJ homolog subfamily C member 13 OS=Homo sapiens GN=DNAJC13 PE=1 SV=5	254.41	0.00010474	1		8.25268	0.916595	2.67147e-05	4.57325	1.1	2	2	7.8483	111.24	6	26708000	2845600	23862000	0.5	1	1	7.1975	116.7	6	38759000	4194700	34565000	0.5	1	1	9.49577	119.2	3	14998000	13347000	1651000	1.1	2	2	8.64753	105.9	6	37040000	33287000	3753700
	748	Q5T2R2-3;Q5T2R2;Q5T2R2-2;H0YEE6	PDSS1	Decaprenyl-diphosphate synthase subunit 1	>sp|Q5T2R2-3|DPS1_HUMAN Isoform 3 of Decaprenyl-diphosphate synthase subunit 1 OS=Homo sapiens GN=PDSS1;>sp|Q5T2R2|DPS1_HUMAN Decaprenyl-diphosphate synthase subunit 1 OS=Homo sapiens GN=PDSS1 PE=1 SV=1;>sp|Q5T2R2-2|DPS1_HUMAN Isoform 2 of Decaprenyl-dipho	42.089	2.7617e-57	4		8.18762	0.913158	0.000151307	3.82014	10.9	3	3	6.8866	21.497	3	882650	108590	774060	10.4	3	3	6.7316	34.74	3	2377800	278490	2099300	12.2	4	4	10.4105	76.817	4	2244800	2022100	222670	17.3	6	6	9.31185	82.601	3	3834900	3606700	228220
	25	B1AL05;Q8N983-2;Q8N983;Q8N983-3;H0Y6Y8;Q8N983-6;Q8N983-7;H0YBU8;M0R051	MRPL43	39S ribosomal protein L43, mitochondrial	>tr|B1AL05|B1AL05_HUMAN 39S ribosomal protein L43, mitochondrial OS=Homo sapiens GN=MRPL43 PE=1 SV=1;>sp|Q8N983-2|RM43_HUMAN Isoform 2 of 39S ribosomal protein L43, mitochondrial OS=Homo sapiens GN=MRPL43;>sp|Q8N983|RM43_HUMAN 39S ribosomal protein L43, mi	20.539	3.0598e-164	9	large SU	8.16936	0.912188	0.013964	1.85499	64.1	13	1			0	499150	0	499150	70.7	15	1	13.63	NaN	1	686080	30743	655330	64.1	14	1	4.10728	14.15	2	3375200	2948700	426420	67.9	14	1	9.73899	87.174	3	2994700	2650000	344690
	640	P82912-2;P82912;H0YL99;P82912-3	MRPS11	28S ribosomal protein S11, mitochondrial	>sp|P82912-2|RT11_HUMAN Isoform 2 of 28S ribosomal protein S11, mitochondrial OS=Homo sapiens GN=MRPS11;>sp|P82912|RT11_HUMAN 28S ribosomal protein S11, mitochondrial OS=Homo sapiens GN=MRPS11 PE=1 SV=2;>tr|H0YL99|H0YL99_HUMAN 28S ribosomal protein S11, mi	20.459	3.2223e-107	4	small SU	8.04387	0.905465	9.82426e-05	4.0077	37.3	6	6	6.9521	159.54	12	417200000	47995000	369210000	44	7	7	6.8085	143.9	13	378990000	44255000	334730000	44	7	7	9.24471	74.669	19	303460000	253600000	49853000	44	7	7	9.56755	79.131	23	386450000	326950000	59499000
	929	Q9BYN8	MRPS26	28S ribosomal protein S26, mitochondrial	>sp|Q9BYN8|RT26_HUMAN 28S ribosomal protein S26, mitochondrial OS=Homo sapiens GN=MRPS26 PE=1 SV=1	24.211	3.2183e-246	1	small SU	8.04344	0.905442	3.6191e-05	4.4414	48.8	16	16	7.7101	152.14	20	549680000	61621000	488060000	38.5	14	14	6.8331	121.27	25	580070000	77033000	503030000	47.8	16	16	8.62738	113.4	31	891910000	797670000	94239000	44.4	16	16	9.20895	67.991	28	726460000	653180000	73283000
	315	O15235	MRPS12	28S ribosomal protein S12, mitochondrial	>sp|O15235|RT12_HUMAN 28S ribosomal protein S12, mitochondrial OS=Homo sapiens GN=MRPS12 PE=1 SV=1	15.173	1.6222e-32	1	small SU	7.99869	0.903019	7.31122e-05	4.13601	46.4	6	6	6.9226	131.65	28	153620000	19640000	133980000	46.4	6	6	6.9379	125.6	24	158300000	19340000	138960000	46.4	6	6	9.58038	83.146	24	79912000	72287000	7625200	46.4	6	6	8.89601	74.071	32	194900000	175250000	19655000
	967	Q9NQ50	MRPL40	39S ribosomal protein L40, mitochondrial	>sp|Q9NQ50|RM40_HUMAN 39S ribosomal protein L40, mitochondrial OS=Homo sapiens GN=MRPL40 PE=1 SV=1	24.49	3.6409e-275	1	large SU	7.96142	0.900991	0.00016269	3.78864	45.6	10	10	6.7366	150.65	39	982560000	135900000	846660000	45.6	11	11	6.3828	121.04	93	1807400000	231660000	1575800000	45.6	10	10	9.72006	102.06	58	2661400000	2408900000	252540000	45.6	10	10	9.61261	92.121	39	1406900000	1269100000	137710000
	635	P82663;E7EPW2;B4DFJ5;B4DQG6	MRPS25	28S ribosomal protein S25, mitochondrial	>sp|P82663|RT25_HUMAN 28S ribosomal protein S25, mitochondrial OS=Homo sapiens GN=MRPS25 PE=1 SV=1;>tr|E7EPW2|E7EPW2_HUMAN 28S ribosomal protein S25, mitochondrial OS=Homo sapiens GN=MRPS25 PE=1 SV=1;>tr|B4DFJ5|B4DFJ5_HUMAN 28S ribosomal protein S25, mitoc	20.116	0	4	small SU	7.82946	0.893732	0.000114863	3.93982	75.7	17	17	6.5291	135.31	49	459910000	66207000	393700000	82.1	19	19	6.8132	129.37	53	755000000	80306000	674690000	82.1	20	20	9.25497	137.79	71	1565500000	685200000	880270000	81.5	19	19	9.12742	115.31	78	761180000	493450000	267730000
	637	P82673;H0YG82;P82673-2	MRPS35	28S ribosomal protein S35, mitochondrial	>sp|P82673|RT35_HUMAN 28S ribosomal protein S35, mitochondrial OS=Homo sapiens GN=MRPS35 PE=1 SV=1	36.844	0	3	small SU	7.79764	0.891963	4.44816e-05	4.35182	60.1	25	25	6.7182	107.94	93	823360000	92040000	731320000	64.1	22	22	7.1408	101.44	139	1051900000	120390000	931510000	57	23	23	8.87626	97.168	107	747000000	669430000	77569000	65	25	25	8.68206	97.62	117	1274000000	1139500000	134480000
	939	Q9H2W6;H0YN64	MRPL46	39S ribosomal protein L46, mitochondrial	>sp|Q9H2W6|RM46_HUMAN 39S ribosomal protein L46, mitochondrial OS=Homo sapiens GN=MRPL46 PE=1 SV=1	31.705	0	2	large SU	7.76398	0.890084	5.90514e-05	4.22877	58.8	17	17	6.6725	119.67	80	1983800000	248910000	1734900000	62.4	17	17	6.9566	118.49	140	1794400000	223330000	1571100000	57	16	16	8.73057	113.95	93	1864800000	1646900000	217960000	60.6	17	17	8.9662	126.27	87	2574700000	2242900000	331830000
	796	X6R631;Q7Z7F7;Q7Z7F7-2;X6RIW1	MRPL55	39S ribosomal protein L55, mitochondrial	>tr|X6R631|X6R631_HUMAN 39S ribosomal protein L55, mitochondrial OS=Homo sapiens GN=MRPL55 PE=4 SV=1;>sp|Q7Z7F7|RM55_HUMAN 39S ribosomal protein L55, mitochondrial OS=Homo sapiens GN=MRPL55 PE=1 SV=1;>sp|Q7Z7F7-2|RM55_HUMAN Isoform 2 of 39S ribosomal prote	14.703	0	4	large SU	7.76388	0.890079	0.000205428	3.68734	33.6	6	6	6.3188	75.844	14	396820000	45025000	351790000	32.8	5	5	6.3673	121.36	16	602220000	64309000	537920000	38.4	6	6	9.8824	93.747	15	287850000	260360000	27490000	45.6	8	8	9.13826	93.726	22	865670000	778410000	87262000
	1035	Q9Y3D9;J3QLR8	MRPS23	28S ribosomal protein S23, mitochondrial	>sp|Q9Y3D9|RT23_HUMAN 28S ribosomal protein S23, mitochondrial OS=Homo sapiens GN=MRPS23 PE=1 SV=2;>tr|J3QLR8|J3QLR8_HUMAN 28S ribosomal protein S23, mitochondrial OS=Homo sapiens GN=MRPS23 PE=1 SV=1	21.77	0	2	small SU	7.74638	0.889099	6.46666e-05	4.18932	66.3	16	16	6.7025	136.1	48	1864300000	231770000	1632500000	71.6	17	17	6.7303	138.92	57	2273200000	343680000	1929500000	68.9	15	15	8.992	95.533	48	1963700000	1753500000	210280000	75.8	18	18	8.87705	95.954	56	1558200000	1391300000	166920000
	274	Q9Y2R9;J3QLS3;J3QQS1;J3QKW2;J3KSI8	MRPS7	28S ribosomal protein S7, mitochondrial	>sp|Q9Y2R9|RT07_HUMAN 28S ribosomal protein S7, mitochondrial OS=Homo sapiens GN=MRPS7 PE=1 SV=2;>tr|J3QLS3|J3QLS3_HUMAN 28S ribosomal protein S7, mitochondrial OS=Homo sapiens GN=MRPS7 PE=1 SV=1;>tr|J3QQS1|J3QQS1_HUMAN 28S ribosomal protein S7, mitochondr	28.134	2.249e-214	5	small SU	7.73589	0.88851	2.78529e-05	4.55513	56.2	18	18	7.1117	126.47	57	1736600000	213790000	1522800000	56.2	18	18	6.8466	102.82	61	1888300000	238590000	1649700000	56.2	17	17	8.50991	97.343	54	1864400000	1658000000	206370000	56.2	18	18	8.64304	102.08	56	1450100000	1291800000	158290000
	877	Q96EL2	MRPS24	28S ribosomal protein S24, mitochondrial	>sp|Q96EL2|RT24_HUMAN 28S ribosomal protein S24, mitochondrial OS=Homo sapiens GN=MRPS24 PE=1 SV=1	19.015	3.625e-264	1	small SU	7.7323	0.888309	3.48714e-05	4.45753	53.9	11	11	6.893	105.18	33	230230000	27787000	202440000	64.7	14	14	6.9389	109.89	36	429870000	47355000	382510000	62.9	13	13	8.89521	81.559	35	199720000	178810000	20906000	62.9	12	12	8.40195	83.316	42	364550000	323750000	40798000
	641	P82914	MRPS15	28S ribosomal protein S15, mitochondrial	>sp|P82914|RT15_HUMAN 28S ribosomal protein S15, mitochondrial OS=Homo sapiens GN=MRPS15 PE=1 SV=1	29.842	9.8947e-73	1	small SU	7.70557	0.886805	4.40403e-05	4.35615	33.1	14	14	6.5472	111.63	34	643030000	73977000	569050000	32.7	15	15	7.2609	115.96	52	683160000	78945000	604220000	40.9	16	16	8.14133	128.08	37	571800000	503630000	68169000	33.9	13	13	9.10913	107.4	37	453480000	399570000	53907000
	198	F5H702;Q96GC5-3;Q96GC5;F5H8D0	MRPL48	39S ribosomal protein L48, mitochondrial	>tr|F5H702|F5H702_HUMAN 39S ribosomal protein L48, mitochondrial OS=Homo sapiens GN=MRPL48 PE=1 SV=1;>sp|Q96GC5-3|RM48_HUMAN Isoform 2 of 39S ribosomal protein L48, mitochondrial OS=Homo sapiens GN=MRPL48;>sp|Q96GC5|RM48_HUMAN 39S ribosomal protein L48, mi	12.77	1.183e-237	4	large SU	7.6439	0.883315	0.00026103	3.58331	53.1	7	7	6.3176	143.02	45	1058400000	125960000	932390000	53.1	8	8	6.0084	119.7	45	1284900000	144040000	1140800000	53.1	7	7	9.47598	95.12	51	498400000	450520000	47881000	53.1	7	7	9.49127	77.556	58	1277500000	1152300000	125210000
	911	Q9BT17;U3KQ69;E9PI62;Q9BT17-2;E7EVK2	MTG1	Mitochondrial GTPase 1	>sp|Q9BT17|MTG1_HUMAN Mitochondrial ribosome-associated GTPase 1 OS=Homo sapiens GN=MTG1 PE=1 SV=2;>tr|U3KQ69|U3KQ69_HUMAN Mitochondrial GTPase 1 OS=Homo sapiens GN=MTG1 PE=3 SV=1;>tr|E9PI62|E9PI62_HUMAN Mitochondrial GTPase 1 OS=Homo sapiens GN=MTG1 PE=3	37.236	1.5016e-138	5		7.62467	0.882221	4.74755e-06	5.32353	65.6	18	18	7.122	71.436	30	54382000	6492100	47890000	54.8	16	16	7.5798	80.209	39	64132000	8240500	55892000	62.3	15	15	8.23723	111.79	35	34778000	30968000	3810400	54.2	14	14	7.60052	81.407	31	61830000	54408000	7422000
	221	G5E9W7;G5E9V5;P82650;H7C5H3;H7C5L9;H7C5F2;Q9H3I1;C9J5D8	MRPS22	28S ribosomal protein S22, mitochondrial	>tr|G5E9W7|G5E9W7_HUMAN 28S ribosomal protein S22, mitochondrial OS=Homo sapiens GN=MRPS22 PE=1 SV=1;>tr|G5E9V5|G5E9V5_HUMAN 28S ribosomal protein S22, mitochondrial OS=Homo sapiens GN=MRPS22 PE=1 SV=1;>sp|P82650|RT22_HUMAN 28S ribosomal protein S22, mitoc	36.805	0	8	small SU	7.62108	0.882017	5.22047e-05	4.28229	78.7	25	25	6.674	148.8	117	1457800000	187530000	1270300000	74	25	25	6.7326	144.56	140	2527100000	320450000	2206600000	75.5	28	28	8.79507	87.031	124	1385400000	1240700000	144700000	73	29	29	8.53606	84.247	104	2349700000	2098700000	250950000
	1042	Q9Y676;B4DFG6	MRPS18B	28S ribosomal protein S18b, mitochondrial	>sp|Q9Y676|RT18B_HUMAN 28S ribosomal protein S18b, mitochondrial OS=Homo sapiens GN=MRPS18B PE=1 SV=1;>tr|B4DFG6|B4DFG6_HUMAN 28S ribosomal protein S18b, mitochondrial OS=Homo sapiens GN=MRPS18B PE=1 SV=1	29.395	0	2	small SU	7.62098	0.882011	0.00017204	3.76437	67.4	14	14	6.35	124.97	59	636500000	96626000	539870000	67.4	13	13	6.2712	114.72	57	722160000	88577000	633590000	70.5	16	16	9.26441	82.857	54	514470000	462430000	52034000	70.9	15	15	9.14328	90.914	63	672140000	604230000	67908000
	252	Q9Y2R5;I3L0E3;E9PE17	MRPS17	28S ribosomal protein S17, mitochondrial	>sp|Q9Y2R5|RT17_HUMAN 28S ribosomal protein S17, mitochondrial OS=Homo sapiens GN=MRPS17 PE=2 SV=1;>tr|I3L0E3|I3L0E3_HUMAN 28S ribosomal protein S17, mitochondrial OS=Homo sapiens GN=MRPS17 PE=3 SV=1;>tr|E9PE17|E9PE17_HUMAN 28S ribosomal protein S17, mitoc	14.502	4.1242e-158	3	small SU	7.61373	0.881597	3.77294e-05	4.42332	64.6	9	9	6.746	148.34	17	343630000	40294000	303340000	64.6	9	9	6.954	153.21	22	452730000	50228000	402500000	64.6	9	9	8.8129	94.986	18	254220000	227990000	26230000	64.6	9	9	8.1281	87.655	26	420690000	373730000	46967000
	858	Q92665	MRPS31	28S ribosomal protein S31, mitochondrial	>sp|Q92665|RT31_HUMAN 28S ribosomal protein S31, mitochondrial OS=Homo sapiens GN=MRPS31 PE=1 SV=3	45.318	0	1	small SU	7.60324	0.880999	6.00579e-05	4.22143	62.5	25	25	6.5754	105.65	74	705820000	83588000	622230000	60.8	23	23	6.7278	107.04	98	1020700000	118400000	902320000	63.3	25	25	8.86132	95.524	92	705470000	598080000	107390000	63	24	24	8.52515	94.398	92	1247800000	1061400000	186420000
	855	Q92552;Q92552-2;G5EA06;D6RH20;D6RJC7;E5RJ73	MRPS27	28S ribosomal protein S27, mitochondrial	>sp|Q92552|RT27_HUMAN 28S ribosomal protein S27, mitochondrial OS=Homo sapiens GN=MRPS27 PE=1 SV=3;>sp|Q92552-2|RT27_HUMAN Isoform 2 of 28S ribosomal protein S27, mitochondrial OS=Homo sapiens GN=MRPS27;>tr|G5EA06|G5EA06_HUMAN 28S ribosomal protein S27, mi	47.611	0	6	small SU	7.56852	0.879011	4.47909e-05	4.34881	73.2	35	35	6.6904	111.93	134	1530800000	176960000	1353800000	73.9	35	35	6.7249	107.6	183	2473900000	295060000	2178800000	69.8	35	35	8.66701	94.875	153	1433800000	1278500000	155230000	74.4	35	35	8.41468	86.459	158	2488400000	2210000000	278360000
	569	P51398;P51398-2;P51398-3;V9GYL9;V9GZ03;V9GYJ9;V9GYA7;V9GZ61;V9GYC9;V9GYW1;V9GY11;V9GYJ3;V9GYF7;V9GYL4;V9GYR8	DAP3	28S ribosomal protein S29, mitochondrial	>sp|P51398|RT29_HUMAN 28S ribosomal protein S29, mitochondrial OS=Homo sapiens GN=DAP3 PE=1 SV=1;>sp|P51398-2|RT29_HUMAN Isoform 2 of 28S ribosomal protein S29, mitochondrial OS=Homo sapiens GN=DAP3;>sp|P51398-3|RT29_HUMAN Isoform 3 of 28S ribosomal protei	45.566	0	15	small SU	7.55672	0.878333	3.38189e-05	4.47084	76.9	31	31	6.6989	150.42	116	1779100000	241640000	1537500000	78.4	32	32	6.7497	142.12	128	2815900000	363480000	2452400000	72.6	32	32	8.57559	102.71	112	1448900000	1294200000	154730000	79.9	32	32	8.40972	91.373	120	2452100000	2185800000	266320000
	85	P82930;C9JJ19	MRPS34	28S ribosomal protein S34, mitochondrial	>sp|P82930|RT34_HUMAN 28S ribosomal protein S34, mitochondrial OS=Homo sapiens GN=MRPS34 PE=1 SV=2;>tr|C9JJ19|C9JJ19_HUMAN 28S ribosomal protein S34, mitochondrial OS=Homo sapiens GN=MRPS34 PE=1 SV=2	25.65	7.2992e-236	2	small SU	7.55344	0.878145	7.25154e-05	4.13957	68.8	14	14	6.3739	117.84	58	448960000	56965000	392000000	72	16	16	6.8715	127.79	73	437920000	57024000	380900000	77.1	19	19	8.62887	89.443	73	278830000	249270000	29563000	78.4	18	18	8.61326	83.905	79	446640000	398160000	48472000
	1023	Q9Y2Q9;H7C5V3;H0YAT2;E5RGC7;E5RFH3;E5RFT8;H0YC42;E5RK86;F5H0B0;U3KQQ8	MRPS28	28S ribosomal protein S28, mitochondrial	>sp|Q9Y2Q9|RT28_HUMAN 28S ribosomal protein S28, mitochondrial OS=Homo sapiens GN=MRPS28 PE=1 SV=1;>tr|H7C5V3|H7C5V3_HUMAN 28S ribosomal protein S28, mitochondrial (Fragment) OS=Homo sapiens GN=MRPS28 PE=1 SV=2;>tr|H0YAT2|H0YAT2_HUMAN 28S ribosomal protein	20.843	3.9129e-136	10	small SU	7.49946	0.87503	0.000147086	3.83243	51.3	9	9	6.1314	118.48	26	672400000	80820000	591580000	61.5	10	10	6.4088	129.2	35	763370000	97301000	666070000	55.1	10	10	8.91027	88.818	28	480810000	430870000	49939000	58.8	11	11	9.03424	75.555	35	625290000	559210000	66081000
	881	Q96EY7;Q96EY7-2;B8ZZQ4;B4DF73;F8WE76	PTCD3	Pentatricopeptide repeat domain-containing protein 3, mitochondrial	>sp|Q96EY7|PTCD3_HUMAN Pentatricopeptide repeat domain-containing protein 3, mitochondrial OS=Homo sapiens GN=PTCD3 PE=1 SV=3	78.549	0	5	small SU	7.49752	0.874918	3.8376e-05	4.41594	65.3	43	43	6.4314	66.341	165	1533700000	190200000	1343500000	65.3	44	44	6.9988	70.101	227	3323800000	395030000	2928800000	65.7	43	43	8.47745	65.929	184	2096800000	1870400000	226420000	65.6	42	42	8.28089	68.231	175	3539300000	3161000000	378270000
	636	P82664	MRPS10	28S ribosomal protein S10, mitochondrial	>sp|P82664|RT10_HUMAN 28S ribosomal protein S10, mitochondrial OS=Homo sapiens GN=MRPS10 PE=1 SV=2	22.999	0	1	small SU	7.47577	0.873656	2.06971e-05	4.68409	48.3	13	13	6.7055	96.572	35	567750000	62101000	505650000	48.8	13	13	6.9586	123.24	43	568730000	63957000	504780000	48.8	15	15	8.11754	98.336	37	393910000	351560000	42352000	54.7	15	15	8.24606	68.158	51	662890000	591480000	71407000
	757	Q5TAQ0;V5IRT4;Q9BRT2	MNF1	Mitochondrial nucleoid factor 1	>tr|Q5TAQ0|Q5TAQ0_HUMAN Ubiquinol-cytochrome-c reductase complex assembly factor 2 OS=Homo sapiens GN=UQCC2 PE=1 SV=1;>tr|V5IRT4|V5IRT4_HUMAN Ubiquinol-cytochrome-c reductase complex assembly factor 2 (Fragment) OS=Homo sapiens GN=UQCC2 PE=1 SV=1;>sp|Q9BRT	11.909	2.2458e-06	3		7.39559	0.868973	0.0472139	1.32593	0	0	0			0	0	0	0	12.9	1	1	10.054	NaN	1	789910	70830	719080	11.9	1	1	5.4401	NaN	1	139980	120290	19693	0	0	0			0	0	0	0
	178	E9PM75;Q9NTG7	SIRT3	NAD-dependent protein deacetylase sirtuin-3, mitochondrial	>tr|E9PM75|E9PM75_HUMAN NAD-dependent protein deacetylase sirtuin-3, mitochondrial OS=Homo sapiens GN=SIRT3 PE=1 SV=1;>sp|Q9NTG7|SIR3_HUMAN NAD-dependent protein deacetylase sirtuin-3, mitochondrial OS=Homo sapiens GN=SIRT3 PE=1 SV=2	37.639	0.00058198	2		7.39405	0.868882	0.0169547	1.77071	3.2	1	1	4.1717	NaN	1	240720	34119	206600	3.2	1	1	6.4156	NaN	1	176680	24403	152280	3.2	1	1	15.1041	NaN	1	128460	121730	6735.1	0	0	0			0	0	0	0
	644	P82933;H7BZC4	MRPS9	28S ribosomal protein S9, mitochondrial	>sp|P82933|RT09_HUMAN 28S ribosomal protein S9, mitochondrial OS=Homo sapiens GN=MRPS9 PE=1 SV=2	45.834	0	2	small SU	7.38645	0.868436	7.11459e-05	4.14785	63.4	29	29	6.3781	132.41	99	857060000	111870000	745190000	60.9	29	29	6.53	104.35	198	1179000000	157490000	1021500000	59.8	24	24	8.52951	82.046	103	788060000	704630000	83430000	63.4	27	27	8.37942	65.837	96	1118200000	999710000	118450000
	869	Q96CM3;Q96CM3-2;E9PJV3	RPUSD4	RNA pseudouridylate synthase domain-containing protein 4	>sp|Q96CM3|RUSD4_HUMAN RNA pseudouridylate synthase domain-containing protein 4 OS=Homo sapiens GN=RPUSD4 PE=2 SV=1;>sp|Q96CM3-2|RUSD4_HUMAN Isoform 2 of RNA pseudouridylate synthase domain-containing protein 4 OS=Homo sapiens GN=RPUSD4	42.205	9.8046e-144	3		7.32811	0.864992	3.44421e-05	4.46291	43.5	15	15	6.8348	81.355	35	46416000	5692800	40723000	46.7	17	17	6.5901	133.03	35	45452000	6681400	38771000	37.4	12	12	7.27326	64.416	33	31273000	26319000	4953800	28.9	11	11	8.80282	80.148	35	53896000	45395000	8501200
	643	P82932	MRPS6	28S ribosomal protein S6, mitochondrial	>sp|P82932|RT06_HUMAN 28S ribosomal protein S6, mitochondrial OS=Homo sapiens GN=MRPS6 PE=1 SV=3	14.226	2.7893e-80	1	small SU	7.31701	0.864334	0.00017494	3.75711	52	9	9	5.6111	76.103	22	177020000	21352000	155670000	67.2	11	11	6.8208	107.13	30	363270000	42300000	320970000	76	12	12	9.05551	82.703	30	208340000	187030000	21310000	67.2	10	10	8.27061	76.288	28	334230000	299080000	35151000
	1031	Q9Y399;Q5T8A0	MRPS2	28S ribosomal protein S2, mitochondrial	>sp|Q9Y399|RT02_HUMAN 28S ribosomal protein S2, mitochondrial OS=Homo sapiens GN=MRPS2 PE=1 SV=1;>tr|Q5T8A0|Q5T8A0_HUMAN 28S ribosomal protein S2, mitochondrial (Fragment) OS=Homo sapiens GN=MRPS2 PE=1 SV=1	33.249	1.879e-289	2	small SU	7.31679	0.86432	6.28956e-05	4.20138	53.7	18	18	6.5037	104.65	55	1061900000	140240000	921610000	53.7	19	19	6.2893	129.4	88	1192900000	154820000	1038100000	53	18	18	8.3724	100.32	54	925470000	825530000	99934000	60.1	21	21	8.3689	123.82	61	1177000000	1022400000	154680000
	642	P82921	MRPS21	28S ribosomal protein S21, mitochondrial	>sp|P82921|RT21_HUMAN 28S ribosomal protein S21, mitochondrial OS=Homo sapiens GN=MRPS21 PE=1 SV=2	10.741	7.3141e-59	1	small SU	7.31407	0.864159	7.01068e-05	4.15424	58.6	5	5	6.123	101.02	12	31672000	4722900	26949000	42.5	4	4	6.8199	89.104	15	44507000	5029300	39478000	43.7	5	5	7.65228	71.959	19	35335000	31517000	3817400	57.5	6	6	8.95576	67.946	29	138350000	124190000	14163000
	638	P82675;P82675-2	MRPS5	28S ribosomal protein S5, mitochondrial	>sp|P82675|RT05_HUMAN 28S ribosomal protein S5, mitochondrial OS=Homo sapiens GN=MRPS5 PE=1 SV=2	48.006	3.94e-190	2	small SU	7.29908	0.863268	8.52766e-05	4.06917	40.5	19	19	6.1328	86.019	92	168930000	23174000	145760000	40.9	20	20	6.4795	78.891	105	340500000	43051000	297450000	43.7	19	19	8.76501	70.759	71	159410000	141610000	17798000	37.9	17	17	8.1493	59.119	74	288570000	257910000	30655000
	977	Q9NWT8	AURKAIP1	Aurora kinase A-interacting protein	>sp|Q9NWT8|AKIP_HUMAN Aurora kinase A-interacting protein OS=Homo sapiens GN=AURKAIP1 PE=1 SV=1	22.354	2.3535e-25	1	small SU	6.95709	0.842427	0.000668436	3.17494	7	1	1	4.3501	NaN	1	1330200	158500	1171700	7	2	2	6.957	9.7114	2	7736800	904740	6832000	7	2	2	8.82379	89.932	2	4800400	4250800	549630	5	1	1	8.7727	NaN	1	7473300	6685800	787530
	1034	Q9Y3D5;H0YAG5;D6RCM2	MRPS18C	28S ribosomal protein S18c, mitochondrial	>sp|Q9Y3D5|RT18C_HUMAN 28S ribosomal protein S18c, mitochondrial OS=Homo sapiens GN=MRPS18C PE=1 SV=1;>tr|H0YAG5|H0YAG5_HUMAN 28S ribosomal protein S18c, mitochondrial (Fragment) OS=Homo sapiens GN=MRPS18C PE=1 SV=1;>tr|D6RCM2|D6RCM2_HUMAN 28S ribosomal pr	15.85	2.6934e-102	3	small SU	6.94722	0.841811	0.000134512	3.87124	31.7	4	4	5.3466	97.821	11	44140000	4992800	39147000	32.4	5	5	6.7489	82.868	10	58756000	6861200	51894000	31.7	4	4	8.3619	85.192	11	18722000	16695000	2027200	32.4	5	5	7.72022	86.445	12	61756000	54060000	7696100
	1033	Q9Y3D3;A6ND22;B4E032	MRPS16	28S ribosomal protein S16, mitochondrial	>sp|Q9Y3D3|RT16_HUMAN 28S ribosomal protein S16, mitochondrial OS=Homo sapiens GN=MRPS16 PE=1 SV=1;>tr|A6ND22|A6ND22_HUMAN 28S ribosomal protein S16, mitochondrial OS=Homo sapiens GN=MRPS16 PE=1 SV=1;>tr|B4E032|B4E032_HUMAN 28S ribosomal protein S16, mitoc	15.345	2.3198e-96	3	small SU	6.67833	0.824668	0.000406724	3.3907	65	9	9	5.0991	150.84	37	229040000	41018000	188030000	67.2	10	10	5.4181	118.42	43	275480000	48169000	227310000	77.4	11	11	8.38223	90.397	31	158530000	141890000	16639000	65.7	9	9	8.58959	77.778	26	316280000	282990000	33285000
	333	O60783	MRPS14	28S ribosomal protein S14, mitochondrial	>sp|O60783|RT14_HUMAN 28S ribosomal protein S14, mitochondrial OS=Homo sapiens GN=MRPS14 PE=1 SV=1	15.139	2.1951e-69	1	small SU	6.39607	0.805913	0.000256608	3.59073	28.9	3	3	5.7039	92.313	14	137560000	18294000	119270000	28.9	3	3	4.8528	92.188	22	265800000	35153000	230640000	31.2	6	6	7.97321	87.2	14	132330000	118520000	13814000	35.2	5	5	7.58323	79.409	16	172810000	154270000	18531000
	950	Q9H857-2;Q9H857;Q9H857-3;Q9H857-4;H7C4G8;H7C519;C9J036	NT5DC2	5-nucleotidase domain-containing protein 2	>sp|Q9H857-2|NT5D2_HUMAN Isoform 2 of 5-nucleotidase domain-containing protein 2 OS=Homo sapiens GN=NT5DC2;>sp|Q9H857|NT5D2_HUMAN 5-nucleotidase domain-containing protein 2 OS=Homo sapiens GN=NT5DC2 PE=1 SV=1;>sp|Q9H857-3|NT5D2_HUMAN Isoform 3 of 5-nucl	64.144	3.6405e-144	7		6.06689	0.782966	0.000316271	3.49994	33.8	13	13	5.3236	36.721	16	17365000	2595800	14769000	36.4	14	14	4.6552	58.609	19	17390000	2899100	14491000	35.5	14	14	7.89765	34.247	24	18219000	16025000	2193500	32.5	13	13	6.92185	73.516	26	28627000	24582000	4045100
	350	O75616;O75616-2;J3QSB2;J3QRV9;J3QT61;K7EQJ8	ERAL1	GTPase Era, mitochondrial	>sp|O75616|ERAL1_HUMAN GTPase Era, mitochondrial OS=Homo sapiens GN=ERAL1 PE=1 SV=2;>sp|O75616-2|ERAL1_HUMAN Isoform HERA-B of GTPase Era, mitochondrial OS=Homo sapiens GN=ERAL1;>tr|J3QSB2|J3QSB2_HUMAN GTPase Era, mitochondrial (Fragment) OS=Homo sapiens G	48.349	0	6		5.92563	0.772735	4.47033e-05	4.34966	31.4	11	11	6.3248	85.072	28	56824000	7209900	49614000	35.2	11	11	6.7962	86.88	33	89461000	10592000	78869000	44.4	15	15	5.64398	81.055	42	48451000	40555000	7896300	37.8	12	12	5.08208	76.72	31	62178000	51962000	10217000
	879	Q96EX1;E5RH51	SMIM12	Small integral membrane protein 12	>sp|Q96EX1|SIM12_HUMAN Small integral membrane protein 12 OS=Homo sapiens GN=SMIM12 PE=2 SV=3;>tr|E5RH51|E5RH51_HUMAN Small integral membrane protein 12 OS=Homo sapiens GN=SMIM12 PE=4 SV=1	10.799	0.00010562	2		5.90798	0.771439	0.0123954	1.90674	0	0	0			0	0	0	0	8.7	1	1	6.3763	NaN	1	420410	56872	363530	0	0	0			0	0	0	0	8.7	1	1	5.47405	97.903	2	1380600	1166200	214420
	875	Q96E29-3;Q96E29-2;Q96E29;E5RIK9;E5RIY4	MTERFD1	mTERF domain-containing protein 1, mitochondrial	>sp|Q96E29-3|MTEF3_HUMAN Isoform 3 of Transcription termination factor 3, mitochondrial OS=Homo sapiens GN=MTERF3;>sp|Q96E29-2|MTEF3_HUMAN Isoform 2 of Transcription termination factor 3, mitochondrial OS=Homo sapiens GN=MTERF3;>sp|Q96E29|MTEF3_HUMAN Trans	34.358	1.9446e-131	5		5.66227	0.752991	2.65332e-05	4.57621	44.6	12	12	5.2093	95.683	20	53615000	9128800	44486000	54.4	16	16	5.1616	76.925	33	95446000	13696000	81750000	53	18	18	6.15764	82.888	24	54056000	46042000	8013500	46.6	14	14	6.20848	78.087	24	84806000	72862000	11944000
	845	Q8WVM0	TFB1M	Dimethyladenosine transferase 1, mitochondrial	>sp|Q8WVM0|TFB1M_HUMAN Dimethyladenosine transferase 1, mitochondrial OS=Homo sapiens GN=TFB1M PE=1 SV=1	39.542	1.7089e-208	1		5.64764	0.751867	1.27286e-05	4.89522	51.4	15	15	5.6587	86.522	18	40820000	5501300	35319000	61.6	17	17	6.2617	74.252	23	63501000	8610000	54891000	46	15	15	5.51724	84.147	19	34443000	29396000	5046500	51.4	15	15	5.204	71.725	17	54682000	42580000	12102000
	805	Q86YH6;B4DKU5;Q86YH6-2;Q5JRD6	PDSS2	Decaprenyl-diphosphate synthase subunit 2	>sp|Q86YH6|DLP1_HUMAN Decaprenyl-diphosphate synthase subunit 2 OS=Homo sapiens GN=PDSS2 PE=1 SV=2;>tr|B4DKU5|B4DKU5_HUMAN Decaprenyl-diphosphate synthase subunit 2 OS=Homo sapiens GN=PDSS2 PE=1 SV=1	44.128	1.1857e-26	4		5.40954	0.73316	0.00139473	2.85551	13	4	4	4.0244	135.64	3	2351400	431610	1919800	16.5	5	5	3.8578	23.01	4	2994800	374880	2620000	14.8	5	5	6.87144	84.895	4	1678100	1503100	174950	11.8	4	4	8.02697	152.39	3	1785200	1637100	148170
	933	Q9GZY4;C9J6J1;C9JA07	COA1	Cytochrome c oxidase assembly protein 1 homolog	>sp|Q9GZY4|COA1_HUMAN Cytochrome c oxidase assembly factor 1 homolog OS=Homo sapiens GN=COA1 PE=1 SV=1;>tr|C9J6J1|C9J6J1_HUMAN Cytochrome c oxidase assembly factor 1 homolog (Fragment) OS=Homo sapiens GN=COA1 PE=1 SV=1;>tr|C9JA07|C9JA07_HUMAN Cytochrome c	16.694	4.2053e-05	3		5.12134	0.709384	0.0223795	1.65015	0	0	0			0	0	0	0	6.2	1	1	4.5915	NaN	1	581400	102630	478770	0	0	0			0	0	0	0	9.6	1	1	5.71233	NaN	1	676420	571590	104830
	24	B7Z314;B1AKV2;Q9NVA1-5;B1AKV6;B1AKV3;Q9NVA1-2;Q9NVA1	UQCC	Ubiquinol-cytochrome c reductase complex chaperone CBP3 homolog	>tr|B7Z314|B7Z314_HUMAN Ubiquinol-cytochrome-c reductase complex assembly factor 1 OS=Homo sapiens GN=UQCC1 PE=1 SV=1;>tr|B1AKV2|B1AKV2_HUMAN Ubiquinol-cytochrome-c reductase complex assembly factor 1 OS=Homo sapiens GN=UQCC1 PE=1 SV=1;>sp|Q9NVA1-5|UQCC1_H	23.627	2.7077e-06	7		5.11622	0.708949	0.0006267	3.20294	4.5	1	1	5.3506	NaN	1	1314000	146370	1167700	4.5	1	1	4.1289	NaN	1	1160700	177240	983430	4.5	1	1	7.40741	NaN	1	1811200	1607800	203390	4.5	1	1	4.1869	NaN	1	1005700	906140	99563
	740	Q56VL3	OCIAD2	OCIA domain-containing protein 2	>sp|Q56VL3|OCAD2_HUMAN OCIA domain-containing protein 2 OS=Homo sapiens GN=OCIAD2 PE=1 SV=1	16.953	1.632e-15	1		5.11308	0.708683	0.000137639	3.86126	14.9	2	2	4.6327	44.274	3	1270000	220070	1049900	8.4	1	1	6.4092	169.91	2	1022400	129030	893320	8.4	1	1	4.50167	74.237	3	762920	647080	115840	14.9	2	2	5.11352	70.013	3	1424700	1196500	228240
	840	Q8TCS8;H7C3C5;H7BXF6;F8WBI3	PNPT1	Polyribonucleotide nucleotidyltransferase 1, mitochondrial	>sp|Q8TCS8|PNPT1_HUMAN Polyribonucleotide nucleotidyltransferase 1, mitochondrial OS=Homo sapiens GN=PNPT1 PE=1 SV=2	85.95	0	4		5.10521	0.708013	6.44021e-05	4.1911	42.3	30	30	4.5413	29.231	34	29501000	5151700	24349000	36.5	25	25	4.68	26.3	27	18915000	3002000	15913000	42.3	28	28	6.05767	31.172	32	24864000	21518000	3345900	37.3	28	28	5.27621	45.386	33	38905000	32717000	6187600
	808	Q8IVS2;Q8IVS2-2	MCAT	Malonyl-CoA-acyl carrier protein transacylase, mitochondrial	>sp|Q8IVS2|FABD_HUMAN Malonyl-CoA-acyl carrier protein transacylase, mitochondrial OS=Homo sapiens GN=MCAT PE=1 SV=2	42.961	5.9223e-164	2		5.07352	0.705309	7.27579e-06	5.13812	44.6	11	11	4.9426	62.868	19	29578000	4717700	24860000	55.1	16	16	5.1291	77.623	26	61643000	10341000	51302000	49.2	14	14	5.43656	84.005	22	26820000	20822000	5998200	48.5	14	14	4.80746	93.876	25	41657000	30662000	10995000
	544	P46199;H7C213	MTIF2	Translation initiation factor IF-2, mitochondrial	>sp|P46199|IF2M_HUMAN Translation initiation factor IF-2, mitochondrial OS=Homo sapiens GN=MTIF2 PE=1 SV=2	81.316	8.8476e-223	2		5.02797	0.701393	7.91717e-05	4.10143	31.4	17	17	4.5176	28.08	28	20859000	3656900	17202000	32	17	17	4.4817	27.05	32	37959000	6661500	31298000	34.9	19	19	5.78068	44.601	36	37528000	31896000	5631900	24.9	15	15	5.4606	43.441	25	49301000	41672000	7628900
	313	O15091-4;O15091-2;O15091;O15091-3	KIAA0391	Mitochondrial ribonuclease P protein 3	>sp|O15091-4|MRRP3_HUMAN Isoform 4 of Mitochondrial ribonuclease P protein 3 OS=Homo sapiens GN=KIAA0391;>sp|O15091-2|MRRP3_HUMAN Isoform 2 of Mitochondrial ribonuclease P protein 3 OS=Homo sapiens GN=KIAA0391;>sp|O15091|MRRP3_HUMAN Mitochondrial ribonucle	56.486	6.823e-28	4		4.95994	0.695476	0.000190963	3.71905	7	3	3	3.8471	19.184	4	951570	176910	774660	4.7	2	2	5.7268	NaN	1	663120	58536	604580	11.7	5	5	4.86027	69.643	5	1048100	822360	225730	6.6	3	3	5.65195	10.289	2	753340	685690	67650
	375	O95900;B7Z7G5	TRUB2	Probable tRNA pseudouridine synthase 2	>sp|O95900|TRUB2_HUMAN Probable tRNA pseudouridine synthase 2 OS=Homo sapiens GN=TRUB2 PE=1 SV=1;>tr|B7Z7G5|B7Z7G5_HUMAN Probable tRNA pseudouridine synthase 2 OS=Homo sapiens GN=TRUB2 PE=1 SV=1	36.694	2.5492e-219	2		4.92879	0.69274	8.83141e-07	6.05397	60.7	18	18	4.8745	142.03	27	113070000	39719000	73346000	71.9	19	19	4.7607	152.13	29	197070000	81864000	115210000	57.4	17	17	5.11718	101.44	26	72370000	60430000	11940000	55.6	17	17	4.96968	106.2	25	93027000	76061000	16965000
	988	Q9NYY8;Q9NYY8-2	FASTKD2	FAST kinase domain-containing protein 2	>sp|Q9NYY8|FAKD2_HUMAN FAST kinase domain-containing protein 2 OS=Homo sapiens GN=FASTKD2 PE=1 SV=1;>sp|Q9NYY8-2|FAKD2_HUMAN Isoform 2 of FAST kinase domain-containing protein 2 OS=Homo sapiens GN=FASTKD2	81.462	0	2		4.86064	0.686694	3.72195e-07	6.42923	51.8	33	33	4.7935	42.17	72	196290000	37755000	158530000	48.2	31	31	4.7567	44.817	73	209810000	37290000	172520000	48.5	30	30	4.87353	33.675	59	106660000	88559000	18097000	49.2	31	31	5.02311	29.283	59	231170000	194720000	36454000
	872	Q96DC9-2;Q96DC9	OTUB2	Ubiquitin thioesterase OTUB2	>sp|Q96DC9-2|OTUB2_HUMAN Isoform 2 of Ubiquitin thioesterase OTUB2 OS=Homo sapiens GN=OTUB2;>sp|Q96DC9|OTUB2_HUMAN Ubiquitin thioesterase OTUB2 OS=Homo sapiens GN=OTUB2 PE=1 SV=2	8.6369	0.00086786	2		4.75572	0.677216	0.0008241	3.08402	9.6	1	1	3.6885	22.042	3	4496800	992900	3503900	9.6	1	1	3.7206	NaN	1	3586800	724340	2862500	9.6	1	1	6.05437	28.041	2	20571000	17371000	3199400	9.6	1	1	6.1565	49.902	3	3022200	2603100	419090
	219	G3V325;O75127;C9JGL8;C9JQN9;P56134-4;C9JJT5;P56134-3;P56134-2;F5H4H2;P56134;C9JU26;Q93074-2	ATP5J2-PTCD1;PTCD1	Pentatricopeptide repeat-containing protein 1, mitochondrial	>tr|G3V325|G3V325_HUMAN Pentatricopeptide repeat-containing protein 1, mitochondrial OS=Homo sapiens GN=ATP5J2-PTCD1 PE=1 SV=1;>sp|O75127|PTCD1_HUMAN Pentatricopeptide repeat-containing protein 1, mitochondrial OS=Homo sapiens GN=PTCD1 PE=1 SV=2	84.109	0	12		4.64831	0.667295	2.3614e-05	4.62683	43.3	29	29	4.4934	61.058	56	81553000	14473000	67080000	48.1	33	33	4.1992	70.002	81	222870000	40716000	182150000	47.7	33	33	4.91256	73.776	68	100600000	80958000	19643000	47.1	31	31	5.03651	82.905	64	187860000	143800000	44059000
	847	Q8WWC4;H7C0V0	C2orf47	Uncharacterized protein C2orf47, mitochondrial	>sp|Q8WWC4|CB047_HUMAN Uncharacterized protein C2orf47, mitochondrial OS=Homo sapiens GN=C2orf47 PE=1 SV=1;>tr|H7C0V0|H7C0V0_HUMAN Uncharacterized protein C2orf47, mitochondrial (Fragment) OS=Homo sapiens GN=C2orf47 PE=1 SV=1	32.544	1.1577e-11	2		4.54721	0.657745	0.00056026	3.25161	7.2	2	2	3.8482	116.94	2	2449300	559830	1889500	16.8	4	4	4.5508	71.046	3	4458700	776900	3681800	12	3	3	6.45328	173.72	3	3062700	2695700	367000	12	3	3	3.78315	176.42	4	5619300	2995700	2623600
	381	P00414	MT-CO3	Cytochrome c oxidase subunit 3	>sp|P00414|COX3_HUMAN Cytochrome c oxidase subunit 3 OS=Homo sapiens GN=MT-CO3 PE=1 SV=2	29.95	1.4952e-23	1		4.4228	0.645697	0.000298662	3.52482	5.4	1	1	5.0753	59.045	3	1014300	192620	821710	10	3	3	3.687	137.96	10	6949700	1089300	5860400	5.4	1	1	3.84098	104.11	7	2710600	2257100	453560	8.8	2	2	5.32368	82.467	8	3654700	3069800	584850
	532	P38646;D6RJI2;H0Y8S0;D6RA73;H0YBG6	HSPA9	Stress-70 protein, mitochondrial	>sp|P38646|GRP75_HUMAN Stress-70 protein, mitochondrial OS=Homo sapiens GN=HSPA9 PE=1 SV=2	73.68	0	5		4.39939	0.643393	0.00148457	2.8284	70.4	57	57	3.2903	35.61	232	2736200000	613780000	2122400000	72.5	57	57	3.3142	40.436	261	7112500000	1568300000	5544200000	71.1	54	54	6.00962	48.897	224	2645600000	2255100000	390540000	67.7	49	49	5.71625	50.53	226	4602700000	3898600000	704100000
	965	Q9NPE2;Q9NPE2-3	NGRN	Neugrin	>sp|Q9NPE2|NGRN_HUMAN Neugrin OS=Homo sapiens GN=NGRN PE=1 SV=2	32.407	1.0509e-167	2		4.3582	0.639308	0.000106409	3.97302	57.4	14	14	4.3199	67.817	15	23674000	4187200	19487000	28.2	6	6	3.6126	66.102	8	3532800	712540	2820300	44.3	11	11	4.76077	84.403	21	16283000	12986000	3296700	50.9	16	16	4.85578	76.494	21	33324000	27407000	5916600
	77	O60229-3;C9IZQ6;O60229-2;H7BXZ5;O60229;J3QSW6	KALRN	Kalirin	>sp|O60229-3|KALRN_HUMAN Isoform 3 of Kalirin OS=Homo sapiens GN=KALRN;>tr|C9IZQ6|C9IZQ6_HUMAN HCG2022551, isoform CRA_j OS=Homo sapiens GN=KALRN PE=4 SV=1;>sp|O60229-2|KALRN_HUMAN Isoform 2 of Kalirin OS=Homo sapiens GN=KALRN;>tr|H7BXZ5|H7BXZ5_HUMAN Kalir	98.658	0.0011374	6		4.34998	0.638487	0.00860261	2.06537	0	0	0			0	0	0	0	2	1	1	3.0216	17.603	2	49040000	10707000	38333000	2	1	1	4.64598	61.218	5	26439000	22558000	3880700	2	1	1	5.86338	29.391	3	15506000	13310000	2195800
	921	Q9BXW7-2;Q9BXW7;A8MYZ9	CECR5	Cat eye syndrome critical region protein 5	>sp|Q9BXW7-2|CECR5_HUMAN Isoform 1 of Cat eye syndrome critical region protein 5 OS=Homo sapiens GN=CECR5;>sp|Q9BXW7|CECR5_HUMAN Cat eye syndrome critical region protein 5 OS=Homo sapiens GN=CECR5 PE=1 SV=1	43.588	1.1916e-48	3		4.3487	0.638359	0.00012805	3.89262	15.5	4	4	3.9562	75.367	7	6718600	1485500	5233200	20.9	5	5	3.7272	85.273	9	9608400	2966000	6642400	20.1	7	7	5.01781	117.05	11	5814000	4630700	1183300	30.5	9	9	4.83349	98.966	13	15168000	12559000	2608900
	1037	Q9Y4W6;K7EP56	AFG3L2	AFG3-like protein 2	>sp|Q9Y4W6|AFG32_HUMAN AFG3-like protein 2 OS=Homo sapiens GN=AFG3L2 PE=1 SV=2	88.583	2.5196e-172	2		4.2877	0.632225	0.000539933	3.26766	23.5	19	18	3.7789	53.817	29	24949000	5366100	19583000	37	24	23	3.4618	66.026	38	72596000	22535000	50061000	31.1	20	19	5.87441	130.25	28	30475000	19171000	11304000	34	24	23	4.39812	40.033	36	48374000	38907000	9467300
	947	Q9H7H0-2;Q9H7H0;Q9H7H0-3;G3V353;G3V4P2;G3V3X6;G3V4H5;H0YJW1;B4E298	METTL17	Methyltransferase-like protein 17, mitochondrial	>sp|Q9H7H0-2|MET17_HUMAN Isoform 2 of Methyltransferase-like protein 17, mitochondrial OS=Homo sapiens GN=METTL17;>sp|Q9H7H0|MET17_HUMAN Methyltransferase-like protein 17, mitochondrial OS=Homo sapiens GN=METTL17 PE=1 SV=1;>sp|Q9H7H0-3|MET17_HUMAN Isoform	49.6	1.8173e-42	9		4.22114	0.62543	0.000136276	3.86558	15.2	5	5	3.668	105.8	5	7067300	1639700	5427600	18.6	7	7	4.4415	47.013	7	16501000	3138800	13362000	11.9	5	5	4.95786	76.443	5	5144700	4223300	921420	5.8	2	2	3.93066	76.671	2	2224600	1830300	394290
	905	Q9BQP7;Q5QPE8;Q5QPE7	MGME1	Mitochondrial genome maintenance exonuclease 1	>sp|Q9BQP7|MGME1_HUMAN Mitochondrial genome maintenance exonuclease 1 OS=Homo sapiens GN=MGME1 PE=1 SV=1;>tr|Q5QPE8|Q5QPE8_HUMAN Mitochondrial genome maintenance exonuclease 1 OS=Homo sapiens GN=MGME1 PE=1 SV=1	39.42	1.2126e-21	3		4.17002	0.620138	9.4367e-05	4.02518	3.5	1	1	4.7604	NaN	1	647030	102350	544680	14.2	3	3	3.5855	43.339	4	1694200	228620	1465600	15.4	4	4	4.06025	37.186	3	995540	810940	184600	11.6	3	3	4.36319	67.182	3	1817300	1389800	427540
	522	P35232;C9JW96;C9JZ20;E7ESE2;E9PCW0;P35232-2;D6RBK0	PHB	Prohibitin	>sp|P35232|PHB_HUMAN Prohibitin OS=Homo sapiens GN=PHB PE=1 SV=1;>tr|C9JW96|C9JW96_HUMAN Prohibitin (Fragment) OS=Homo sapiens GN=PHB PE=1 SV=2;>tr|C9JZ20|C9JZ20_HUMAN Prohibitin (Fragment) OS=Homo sapiens GN=PHB PE=1 SV=1;>tr|E7ESE2|E7ESE2_HUMAN Prohibiti	29.804	0	7		4.15849	0.618936	0.00011979	3.92158	79.4	18	18	3.6395	116.32	59	537730000	115720000	422020000	79.4	20	20	3.7929	107.78	75	569330000	111750000	457590000	73.5	18	18	4.92587	91.28	48	300470000	248150000	52319000	76.8	20	20	4.39792	99.315	59	579370000	465030000	114330000
	885	Q96I51-3;Q96I51;Q96I51-2;C9JWG9	WBSCR16	Williams-Beuren syndrome chromosomal region 16 protein	>sp|Q96I51-3|WBS16_HUMAN Isoform 3 of Williams-Beuren syndrome chromosomal region 16 protein OS=Homo sapiens GN=WBSCR16;>sp|Q96I51|WBS16_HUMAN Williams-Beuren syndrome chromosomal region 16 protein OS=Homo sapiens GN=WBSCR16 PE=1 SV=2;>sp|Q96I51-2|WBS16_HU	48.761	2.9286e-76	4		4.14981	0.618028	7.11426e-06	5.14787	24.7	9	9	3.9375	79.918	12	26020000	4872400	21148000	30	12	12	3.95	92.982	16	77654000	19981000	57673000	22.7	8	8	4.37867	76.192	12	26826000	21821000	5005600	18.7	8	8	4.35464	85.862	12	40744000	32138000	8605400
	367	O95202;O95202-2;O95202-3	LETM1	LETM1 and EF-hand domain-containing protein 1, mitochondrial	>sp|O95202|LETM1_HUMAN LETM1 and EF-hand domain-containing protein 1, mitochondrial OS=Homo sapiens GN=LETM1 PE=1 SV=1	83.353	4.3015e-53	3		4.14781	0.617818	0.000111455	3.9529	5.5	3	3	4.0927	47.014	5	1651200	355940	1295300	7.4	4	4	3.5733	32.305	4	2242200	447330	1794800	15.7	9	9	4.10796	32.652	12	5189000	4372100	816820	17.9	11	11	4.92684	54.391	12	9411200	7984600	1426600
	264	Q99623;J3KPX7;F5GY37;Q99623-2;F5GWA7;F5H3X6;F5H0C5;F5H2D2;U3KPZ5	PHB2	Prohibitin-2	>sp|Q99623|PHB2_HUMAN Prohibitin-2 OS=Homo sapiens GN=PHB2 PE=1 SV=2;>tr|J3KPX7|J3KPX7_HUMAN Prohibitin-2 OS=Homo sapiens GN=PHB2 PE=1 SV=1;>tr|F5GY37|F5GY37_HUMAN Prohibitin-2 OS=Homo sapiens GN=PHB2 PE=1 SV=1;>sp|Q99623-2|PHB2_HUMAN Isoform 2 of Prohibit	33.296	0	9		4.14172	0.617181	8.26019e-05	4.08301	68.6	19	19	3.6544	122.7	38	600280000	121250000	479030000	59.2	16	16	3.9252	105	42	807860000	155470000	652380000	67.9	19	19	4.79386	92.069	35	374810000	309130000	65685000	65.6	18	18	4.27917	106.92	33	612350000	490910000	121440000
	1027	Q9Y2Z4;H0YHS6	YARS2	Tyrosine--tRNA ligase, mitochondrial	>sp|Q9Y2Z4|SYYM_HUMAN Tyrosine--tRNA ligase, mitochondrial OS=Homo sapiens GN=YARS2 PE=1 SV=2;>tr|H0YHS6|H0YHS6_HUMAN Tyrosine--tRNA ligase, mitochondrial (Fragment) OS=Homo sapiens GN=YARS2 PE=1 SV=1	53.198	1.8853e-230	2		4.04729	0.607165	9.16769e-05	4.03774	43.4	13	13	3.87	81.042	14	57034000	11875000	45159000	30.4	10	10	3.4729	61.107	17	53642000	9968900	43673000	38.2	14	14	4.41872	66.529	16	39830000	32869000	6960500	33.1	11	11	4.51814	67.789	14	54562000	44626000	9936600
	862	Q969Z0;C9IZN7;Q969Z0-2;C9J7P5;C9J5A2;C9J347;H7C4R5	TBRG4	Protein TBRG4	>sp|Q969Z0|TBRG4_HUMAN Protein TBRG4 OS=Homo sapiens GN=TBRG4 PE=1 SV=1;>tr|C9IZN7|C9IZN7_HUMAN Protein TBRG4 (Fragment) OS=Homo sapiens GN=TBRG4 PE=1 SV=1;>sp|Q969Z0-2|TBRG4_HUMAN Isoform 2 of Protein TBRG4 OS=Homo sapiens GN=TBRG4;>tr|C9J7P5|C9J7P5_HUMAN	70.737	3.0615e-31	7		3.9983	0.601875	0.000125254	3.90221	4.8	2	2	3.6865	36.185	3	684400	124460	559940	10.3	5	5	3.4879	91.292	5	1106900	318400	788490	8.6	4	4	4.68231	24.702	6	874770	740780	133990	9	5	5	4.24484	30.537	8	3228800	2573800	654960
	662	Q07021;I3L3Q7;I3L3B0	C1QBP	Complement component 1 Q subcomponent-binding protein, mitochondrial	>sp|Q07021|C1QBP_HUMAN Complement component 1 Q subcomponent-binding protein, mitochondrial OS=Homo sapiens GN=C1QBP PE=1 SV=1;>tr|I3L3Q7|I3L3Q7_HUMAN Complement component 1 Q subcomponent-binding protein, mitochondrial (Fragment) OS=Homo sapiens GN=C1QBP	31.362	3.3983e-227	3		3.94777	0.596352	0.00016739	3.77627	31.6	6	6	3.6025	79.11	13	89746000	18812000	70934000	31.6	6	6	3.3556	73.916	28	93989000	21303000	72686000	42.6	8	8	4.67312	83.563	27	81837000	66739000	15098000	42.2	7	7	4.2996	71.294	19	162740000	131200000	31546000
	379	P00395	MT-CO1	Cytochrome c oxidase subunit 1	>sp|P00395|COX1_HUMAN Cytochrome c oxidase subunit 1 OS=Homo sapiens GN=MT-CO1 PE=1 SV=1	57.041	9.0781e-07	1		3.79588	0.579312	0.000452752	3.34414	4.3	2	2	3.0304	44.052	2	8642500	1649700	6992800	1.6	1	1	4.8625	NaN	1	9911300	1693100	8218200	7.6	3	3	3.88878	73.256	4	7120600	5778400	1342200	1.6	1	1	3.62306	NaN	1	12446000	9789600	2656200
	737	Q53R41;Q53R41-2;C9JMM4;E7EW60;C9JTP4	FASTKD1	FAST kinase domain-containing protein 1	>sp|Q53R41|FAKD1_HUMAN FAST kinase domain-containing protein 1 OS=Homo sapiens GN=FASTKD1 PE=1 SV=1;>sp|Q53R41-2|FAKD1_HUMAN Isoform 2 of FAST kinase domain-containing protein 1 OS=Homo sapiens GN=FASTKD1	97.41	1.6951e-23	5		3.78531	0.578102	0.000938685	3.02748	4.4	3	3	3.3901	17.182	2	514580	82542	432030	1.2	1	1			0	0	0	0	6.8	5	5	3.96055	14.098	6	1150800	952000	198790	5.5	4	4	4.03959	25.767	5	1424900	1145400	279440
	1040	Q9Y5R4;H7C258	HEMK1	HemK methyltransferase family member 1	>sp|Q9Y5R4|HEMK1_HUMAN HemK methyltransferase family member 1 OS=Homo sapiens GN=HEMK1 PE=2 SV=1	38.23	1.2072e-66	2		3.75694	0.574835	0.000245403	3.61012	23.1	5	5	3.4762	57.261	7	3274700	660300	2614400	16.9	4	4	3.1385	39.171	6	3124700	637160	2487600	16	3	3	3.99393	72.245	4	1617100	1319200	297900	11.5	3	3	4.57206	39.992	4	2399100	1888800	510290
	521	P34897-3;P34897;P34897-2;B4DLV4;G3V2Y4;H0YIZ0;G3V5L0;G3V540;G3V4W5;G3V241;G3V3Y8;G3V4T0;G3V4X0;G3V2W0;G3V2E4;G3V2D2;P34896-4;P34896-3;P34896-2;P34896	SHMT2	Serine hydroxymethyltransferase, mitochondrial;Serine hydroxymethyltransferase	>sp|P34897-3|GLYM_HUMAN Isoform 3 of Serine hydroxymethyltransferase, mitochondrial OS=Homo sapiens GN=SHMT2;>sp|P34897|GLYM_HUMAN Serine hydroxymethyltransferase, mitochondrial OS=Homo sapiens GN=SHMT2 PE=1 SV=3;>sp|P34897-2|GLYM_HUMAN Isoform 2 of Serine	53.454	9.6115e-89	20		3.67829	0.565646	0.000435793	3.36072	18.2	6	6	3.4698	59.799	7	3434400	750830	2683500	28.2	10	10	2.9693	25.234	13	6856300	1722800	5133500	26.7	10	10	4.66592	55.502	12	16948000	15152000	1796600	28.4	10	10	3.80793	95.868	10	8688500	6416400	2272100
	790	Q7L8L6	FASTKD5	FAST kinase domain-containing protein 5	>sp|Q7L8L6|FAKD5_HUMAN FAST kinase domain-containing protein 5 OS=Homo sapiens GN=FASTKD5 PE=1 SV=1	86.573	5.2002e-74	1		3.67749	0.565552	0.00396798	2.40143	2.9	3	3	4.7255	125.97	4	1311900	254050	1057900	6.8	3	3	3.238	NaN	1	1121500	57097	1064400	13.4	10	10	5.49511	65.451	7	3556200	3007000	549220	10.9	7	7	2.17524	75.583	7	5082100	3449200	1632900
	786	Q7L2E3-2;Q7L2E3-3;H7BXY3;Q7L2E3	DHX30	Putative ATP-dependent RNA helicase DHX30	>sp|Q7L2E3-2|DHX30_HUMAN Isoform 2 of Putative ATP-dependent RNA helicase DHX30 OS=Homo sapiens GN=DHX30;>sp|Q7L2E3-3|DHX30_HUMAN Isoform 3 of Putative ATP-dependent RNA helicase DHX30 OS=Homo sapiens GN=DHX30;>tr|H7BXY3|H7BXY3_HUMAN Putative ATP-dependent	136.11	0	4		3.66611	0.564206	0.000323653	3.48992	75.8	82	82	3.1321	48.143	222	1001400000	237620000	763800000	70.7	75	75	3.1886	42.503	220	666440000	155810000	510630000	74.6	79	79	4.34273	52.309	211	679100000	544590000	134500000	71.8	77	77	4.1651	52.989	220	1022800000	817550000	205290000
	770	Q6PI48;Q9H9M6	DARS2	Aspartate--tRNA ligase, mitochondrial	>sp|Q6PI48|SYDM_HUMAN Aspartate--tRNA ligase, mitochondrial OS=Homo sapiens GN=DARS2 PE=1 SV=1	73.562	5.158e-24	2		3.64315	0.561477	0.0019983	2.69934	10.2	5	5	3.7575	11.951	5	1752500	325970	1426500	10.7	5	5	3.0791	21.95	6	3504300	683100	2821200	19.7	9	9	5.65707	49.827	10	2574100	2180200	393870	11.3	5	5	2.6915	41.487	8	4272900	3383100	889740
	254	Q9Y3D7;I3L1U7;I3L0X9;I3L3T0;P57737-3	PAM16	Mitochondrial import inner membrane translocase subunit TIM16	>sp|Q9Y3D7|TIM16_HUMAN Mitochondrial import inner membrane translocase subunit TIM16 OS=Homo sapiens GN=PAM16 PE=1 SV=2;>tr|I3L1U7|I3L1U7_HUMAN Mitochondrial import inner membrane translocase subunit TIM16 OS=Homo sapiens GN=PAM16 PE=4 SV=1;>tr|I3L0X9|I3L0	13.825	3.0211e-108	5		3.63892	0.560973	0.000422143	3.37454	20	2	2	2.965	157.76	2	1112400	254220	858190	52.8	5	5	3.2994	87.711	5	5809300	1312600	4496700	35.2	3	3	4.44603	44.941	3	1864100	1518500	345590	39.2	3	3	4.03145	84.982	3	3643700	3003100	640570
	211	F8W7Q4;Q96A26	FAM162A	Protein FAM162A	>tr|F8W7Q4|F8W7Q4_HUMAN Protein FAM162A OS=Homo sapiens GN=FAM162A PE=1 SV=1;>sp|Q96A26|F162A_HUMAN Protein FAM162A OS=Homo sapiens GN=FAM162A PE=1 SV=2	16.515	0.00020359	2		3.60662	0.5571	0.0138089	1.85984	7.6	1	1	2.3313	NaN	1	647770	140230	507530	7.6	1	1	4.5479	NaN	1	940240	187320	752920	7.6	1	1	4.42478	NaN	1	401680	324990	76688	7.6	1	1			0	0	0	0
	1017	Q9UQ90;H3BTR8;H3BTY6;Q9UQ90-2	SPG7	Paraplegin	>sp|Q9UQ90|SPG7_HUMAN Paraplegin OS=Homo sapiens GN=SPG7 PE=1 SV=2;>tr|H3BTR8|H3BTR8_HUMAN Paraplegin (Fragment) OS=Homo sapiens GN=SPG7 PE=4 SV=1	88.234	7.932e-15	4		3.47566	0.541037	0.0135463	1.86818	3.8	2	2	2.315	90.218	2	475140	140450	334690	0	0	0			0	0	0	0	7.5	4	4	4.45276	22.736	3	1086500	913220	173310	2.9	2	2	4.07315	7.2657	2	1365000	1153300	211760
	966	Q9NPL8;C9JU35;G3XA94;C9JR82;H7C5U1;F8WAU6;F8WB00;F8WC42	TIMMDC1	Translocase of inner mitochondrial membrane domain-containing protein 1	>sp|Q9NPL8|TIDC1_HUMAN Complex I assembly factor TIMMDC1, mitochondrial OS=Homo sapiens GN=TIMMDC1 PE=1 SV=2;>tr|C9JU35|C9JU35_HUMAN Complex I assembly factor TIMMDC1, mitochondrial OS=Homo sapiens GN=TIMMDC1 PE=1 SV=1;>tr|G3XA94|G3XA94_HUMAN Chromosome 3	32.177	4.4526e-81	8		3.47107	0.540464	0.00280221	2.5525	18.6	4	4	3.1074	106.61	4	2683100	595430	2087700	18.9	4	4	2.2389	196	2	1394900	442150	952790	20.7	4	4	4.79754	112.66	3	944190	825210	118980	7	2	2	4.34915	64.098	2	718060	598590	119470
	678	Q13011;M0R248	ECH1	Delta(3,5)-Delta(2,4)-dienoyl-CoA isomerase, mitochondrial	>sp|Q13011|ECH1_HUMAN Delta(3,5)-Delta(2,4)-dienoyl-CoA isomerase, mitochondrial OS=Homo sapiens GN=ECH1 PE=1 SV=2;>tr|M0R248|M0R248_HUMAN Delta(3,5)-Delta(2,4)-dienoyl-CoA isomerase, mitochondrial (Fragment) OS=Homo sapiens GN=ECH1 PE=1 SV=1	35.816	1.6743e-39	2		3.46003	0.53908	0.00322114	2.49199	4.9	1	1	2.214	NaN	1	688700	183060	505640	11.9	3	2	3.0642	NaN	1	778850	154600	624250	16.5	4	4	5.2233	28.386	3	1827000	1483100	343960	7.9	2	2	4.04465	5.3188	2	1911900	1534400	377420
	920	Q9BW92;U3KQG0;Q9BW92-2;B4DQF3;Q5T5F2;Q5T5E9;U3KQ50	TARS2	Threonine--tRNA ligase, mitochondrial	>sp|Q9BW92|SYTM_HUMAN Threonine--tRNA ligase, mitochondrial OS=Homo sapiens GN=TARS2 PE=1 SV=1;>tr|U3KQG0|U3KQG0_HUMAN Threonine--tRNA ligase, mitochondrial OS=Homo sapiens GN=TARS2 PE=1 SV=1;>sp|Q9BW92-2|SYTM_HUMAN Isoform 2 of Threonine--tRNA ligase, mit	81.035	9.6907e-64	7		3.44953	0.537759	0.00166299	2.77911	10.9	7	7	2.8172	24.207	10	2875500	749160	2126300	18.7	11	11	2.5425	16.076	10	9016600	2230900	6785800	13.9	8	8	4.5041	34.858	8	3642200	3094200	548020	16.7	10	10	4.38885	27.928	11	7883600	6538300	1345300
	820	Q8N0V3;Q8N0V3-2;K7EIS1	RBFA	Putative ribosome-binding factor A, mitochondrial	>sp|Q8N0V3|RBFA_HUMAN Putative ribosome-binding factor A, mitochondrial OS=Homo sapiens GN=RBFA PE=1 SV=3;>sp|Q8N0V3-2|RBFA_HUMAN Isoform 2 of Putative ribosome-binding factor A, mitochondrial OS=Homo sapiens GN=RBFA	38.359	2.9323e-28	3		3.41829	0.533809	0.00401098	2.39675	6.1	2	2	2.4107	46.447	2	1630000	372470	1257600	14.3	4	4	2.493	52.25	4	3179100	740070	2439100	14.3	4	4	5.1036	36.175	4	2538800	2128300	410500	6.1	2	2	4.45137	45.402	2	2241100	1811200	429930
	659	Q04837;E7EUY5;C9K0U8	SSBP1	Single-stranded DNA-binding protein, mitochondrial	>sp|Q04837|SSBP_HUMAN Single-stranded DNA-binding protein, mitochondrial OS=Homo sapiens GN=SSBP1 PE=1 SV=1;>tr|E7EUY5|E7EUY5_HUMAN Single-stranded DNA-binding protein, mitochondrial (Fragment) OS=Homo sapiens GN=SSBP1 PE=1 SV=1;>tr|C9K0U8|C9K0U8_HUMAN Sin	17.259	1.4034e-154	3		3.41576	0.533488	0.000358558	3.44544	15.5	2	2	3.1003	92.465	2	4319600	1042600	3277000	43.9	5	5	3.0451	99.436	5	14432000	3443000	10989000	32.4	3	3	4.34556	26.065	3	3425200	2711000	714190	39.9	6	6	3.31818	65.878	6	14097000	10733000	3364100
	742	Q5JRX3;Q5JRX3-2;Q5JRX3-3;B1APQ0	PITRM1	Presequence protease, mitochondrial	>sp|Q5JRX3|PREP_HUMAN Presequence protease, mitochondrial OS=Homo sapiens GN=PITRM1 PE=1 SV=3;>sp|Q5JRX3-2|PREP_HUMAN Isoform 2 of Presequence protease, mitochondrial OS=Homo sapiens GN=PITRM1;>sp|Q5JRX3-3|PREP_HUMAN Isoform 3 of Presequence protease, mito	117.41	3.0582e-12	4		3.41273	0.533103	0.00277536	2.55668	0.9	1	1	2.1652	NaN	1	533570	169930	363640	6	5	5	3.3993	71.745	5	1289900	415450	874490	2.8	3	3	5.03854	17.667	2	516800	448100	68705	2.8	3	3	3.65778	73.15	3	1273500	1057600	215860
	958	Q9HCC0;Q9HCC0-2;D6RD67;D6RDF7;D6R9R1	MCCC2	Methylcrotonoyl-CoA carboxylase beta chain, mitochondrial	>sp|Q9HCC0|MCCB_HUMAN Methylcrotonoyl-CoA carboxylase beta chain, mitochondrial OS=Homo sapiens GN=MCCC2 PE=1 SV=1;>sp|Q9HCC0-2|MCCB_HUMAN Isoform 2 of Methylcrotonoyl-CoA carboxylase beta chain, mitochondrial OS=Homo sapiens GN=MCCC2;>tr|D6RD67|D6RD67_HUM	61.332	1.2209e-225	5		3.38206	0.529181	0.00172826	2.76239	40.9	15	15	2.7347	19.14	15	8577100	2229400	6347700	45.3	18	18	2.5955	21.395	17	11931000	3294600	8636400	38.5	14	14	4.64749	27.172	16	6320500	5183500	1137000	33.7	14	14	3.96621	18.271	16	13398000	10622000	2775900
	902	Q9BQ52-4;Q9BQ52;G5E9D5;V9GZ72;E7ES68;V9GYS7;Q9BQ52-3;Q9BQ52-2;J3QRS2;V9GYU5;J3QL08;J3QLK4;H7C2I4	ELAC2	Zinc phosphodiesterase ELAC protein 2	>sp|Q9BQ52-4|RNZ2_HUMAN Isoform 4 of Zinc phosphodiesterase ELAC protein 2 OS=Homo sapiens GN=ELAC2;>sp|Q9BQ52|RNZ2_HUMAN Zinc phosphodiesterase ELAC protein 2 OS=Homo sapiens GN=ELAC2 PE=1 SV=2;>tr|G5E9D5|G5E9D5_HUMAN ElaC homolog 2 (E. coli), isoform CRA	87.563	1.5841e-19	13		3.36943	0.527557	0.012006	1.9206	0	0	0			0	0	0	0	0	0	0			0	0	0	0	7.4	5	5	3.5089	35.552	5	745360	609990	135370	6	4	4	3.23551	65.035	4	1006300	687020	319250
	245	H7C2E8;Q9BVS5	TRMT61B	tRNA (adenine(58)-N(1))-methyltransferase, mitochondrial	>tr|H7C2E8|H7C2E8_HUMAN tRNA (adenine(58)-N(1))-methyltransferase, mitochondrial (Fragment) OS=Homo sapiens GN=TRMT61B PE=4 SV=1;>sp|Q9BVS5|TR61B_HUMAN tRNA (adenine(58)-N(1))-methyltransferase, mitochondrial OS=Homo sapiens GN=TRMT61B PE=1 SV=2	11.459	2.8493e-55	2		3.36354	0.526797	0.0266318	1.5746	11.8	1	1			0	491320	0	491320	11.8	1	1	5.0179	NaN	1	713220	39201	674020	19.6	2	2	4.01735	68.735	4	1108200	917250	190940	11.8	1	1	1.88768	91.945	2	1360500	1007400	353160
	195	F5H5I6;H0Y8R1;H0YAK1;Q12849;Q12849-5;H0YAM1	GRSF1	G-rich sequence factor 1	>tr|F5H5I6|F5H5I6_HUMAN G-rich sequence factor 1 OS=Homo sapiens GN=GRSF1 PE=1 SV=1;>tr|H0Y8R1|H0Y8R1_HUMAN G-rich sequence factor 1 (Fragment) OS=Homo sapiens GN=GRSF1 PE=1 SV=1;>tr|H0YAK1|H0YAK1_HUMAN G-rich sequence factor 1 (Fragment) OS=Homo sapiens G	41.634	3.0424e-130	6		3.33019	0.522469	0.000802934	3.09532	38.4	11	11	2.9272	90.091	22	58486000	14302000	44184000	47	11	11	2.6207	74.95	29	74185000	17811000	56373000	40.9	11	11	4.15904	67.205	24	35070000	27761000	7308700	49.4	14	14	3.8549	77.391	18	46619000	36842000	9777000
	200	F6SBX2;Q9NSE4	IARS2	Isoleucine--tRNA ligase, mitochondrial	>tr|F6SBX2|F6SBX2_HUMAN Isoleucine--tRNA ligase, mitochondrial OS=Homo sapiens GN=IARS2 PE=1 SV=1;>sp|Q9NSE4|SYIM_HUMAN Isoleucine--tRNA ligase, mitochondrial OS=Homo sapiens GN=IARS2 PE=1 SV=2	106.04	2.068e-25	2		3.3089	0.519683	0.00118946	2.92465	1.6	1	1	2.571	NaN	1	67883	18479	49403	2.7	2	2	2.7597	NaN	1	85048	24077	60971	6.2	5	5	4.10661	26.84	4	848690	717440	131250	1.1	1	1	4.11421	NaN	1	209260	162630	46633
	346	O75439;G3V0E4;E7ERZ4;F8WAZ6;F8WEA6;F8WBE1	PMPCB	Mitochondrial-processing peptidase subunit beta	>sp|O75439|MPPB_HUMAN Mitochondrial-processing peptidase subunit beta OS=Homo sapiens GN=PMPCB PE=1 SV=2;>tr|G3V0E4|G3V0E4_HUMAN Mitochondrial-processing peptidase subunit beta OS=Homo sapiens GN=PMPCB PE=1 SV=1;>tr|E7ERZ4|E7ERZ4_HUMAN Mitochondrial-proces	54.366	1.2972e-36	6		3.26649	0.514081	0.00247076	2.60717	11.9	5	5	3.0381	70.203	4	5568300	1071700	4496700	20.9	8	8	2.2354	55.593	8	14731000	4144500	10587000	17.2	6	6	4.80192	61.518	6	4995400	4102800	892620	14.3	6	6	3.49101	80.083	6	10995000	8886600	2108300
	763	Q6P087;Q6P087-2;C9JM75;H7C454;H7C1H7;Q6P087-3;H7C0K7;H7C2C3	RPUSD3	RNA pseudouridylate synthase domain-containing protein 3	>sp|Q6P087|RUSD3_HUMAN RNA pseudouridylate synthase domain-containing protein 3 OS=Homo sapiens GN=RPUSD3 PE=1 SV=3;>sp|Q6P087-2|RUSD3_HUMAN Isoform 2 of RNA pseudouridylate synthase domain-containing protein 3 OS=Homo sapiens GN=RPUSD3;>tr|C9JM75|C9JM75_H	38.46	7.0873e-151	8		3.24272	0.510909	1.1144e-05	4.95296	48.4	13	13	3.0623	112.03	17	25095000	7931300	17164000	49.3	14	14	3.1272	117.66	32	44275000	16137000	28138000	53.6	16	16	3.3465	68.404	29	21631000	16790000	4841800	45.6	14	14	3.45018	71.791	27	33632000	25765000	7866900
	871	Q96DA6;Q96DA6-2;F2Z3A7;G5E9V2	DNAJC19	Mitochondrial import inner membrane translocase subunit TIM14	>sp|Q96DA6|TIM14_HUMAN Mitochondrial import inner membrane translocase subunit TIM14 OS=Homo sapiens GN=DNAJC19 PE=1 SV=3;>sp|Q96DA6-2|TIM14_HUMAN Isoform 2 of Mitochondrial import inner membrane translocase subunit TIM14 OS=Homo sapiens GN=DNAJC19;>tr|F2Z	12.498	1.5312e-20	4		3.23899	0.51041	0.0033136	2.4797	28.4	2	2	2.2096	179.66	2	1773400	400160	1373200	12.1	1	1	3.4452	NaN	1	3335200	720340	2614800	37.9	4	4	4.98529	54.093	4	3153400	2616100	537280	23.3	2	2	2.90015	62.422	2	2556400	1949900	606470
	579	P53007;B4DP62	SLC25A1	Tricarboxylate transport protein, mitochondrial	>sp|P53007|TXTP_HUMAN Tricarboxylate transport protein, mitochondrial OS=Homo sapiens GN=SLC25A1 PE=1 SV=2;>tr|B4DP62|B4DP62_HUMAN Solute carrier family 25 (Mitochondrial carrier citrate transporter), member 1, isoform CRA_b OS=Homo sapiens GN=SLC25A1 PE=1	34.012	2.1221e-26	2		3.20323	0.505589	5.5552e-06	5.2553	16.4	5	5	3.1172	79.978	5	7618400	1861500	5756900	19.9	6	6	3.1771	68.46	7	9052500	2148500	6904000	16.4	5	5	3.38788	74.921	6	5797600	4424800	1372800	19.9	6	6	3.13785	36.498	7	10015000	7536500	2478500
	1028	Q9Y305-3;Q9Y305-2;Q9Y305;Q9Y305-4;H7C5Q2;C9J7L8	ACOT9	Acyl-coenzyme A thioesterase 9, mitochondrial	>sp|Q9Y305-3|ACOT9_HUMAN Isoform 3 of Acyl-coenzyme A thioesterase 9, mitochondrial OS=Homo sapiens GN=ACOT9;>sp|Q9Y305-2|ACOT9_HUMAN Isoform 2 of Acyl-coenzyme A thioesterase 9, mitochondrial OS=Homo sapiens GN=ACOT9;>sp|Q9Y305|ACOT9_HUMAN Acyl-coenzyme A	43.206	5.9779e-13	6		3.15244	0.498647	0.0045868	2.33849	2.6	1	1	1.9596	NaN	1	1389600	412410	977200	10.8	4	4	2.8333	28.286	4	4618900	1015200	3603700	7.7	3	3	4.72255	51.942	3	2782000	2231400	550520	7.9	3	3	3.76662	89.218	3	3627200	2725800	901470
	504	P30048-2;P30048	PRDX3	Thioredoxin-dependent peroxide reductase, mitochondrial	>sp|P30048-2|PRDX3_HUMAN Isoform 2 of Thioredoxin-dependent peroxide reductase, mitochondrial OS=Homo sapiens GN=PRDX3;>sp|P30048|PRDX3_HUMAN Thioredoxin-dependent peroxide reductase, mitochondrial OS=Homo sapiens GN=PRDX3 PE=1 SV=3	25.838	2.232e-89	2		3.11346	0.493244	0.00198637	2.70194	26.5	6	6	2.3945	91.455	15	40980000	12178000	28802000	57.1	10	10	2.5178	94.573	21	60034000	17573000	42462000	44.5	9	9	4.29056	98.722	21	47050000	36897000	10153000	40.3	8	8	3.63266	86.84	25	79053000	64503000	14550000
	718	Q15526-2;Q15526	SURF1	Surfeit locus protein 1	>sp|Q15526-2|SURF1_HUMAN Isoform 2 of Surfeit locus protein 1 OS=Homo sapiens GN=SURF1;>sp|Q15526|SURF1_HUMAN Surfeit locus protein 1 OS=Homo sapiens GN=SURF1 PE=1 SV=1	31.978	1.2851e-06	2		3.03478	0.482127	0.00206695	2.68467	6.2	2	2	3.0111	155	2	850730	225240	625490	6.2	2	2	2.11	NaN	1	712220	106200	606020	3.5	1	1	4.0662	NaN	1	247640	196530	51111	3.5	1	1	3.28332	NaN	1	527320	383620	143700
	571	P51649;P51649-2;F5H328;C9J8Q5	ALDH5A1	Succinate-semialdehyde dehydrogenase, mitochondrial	>sp|P51649|SSDH_HUMAN Succinate-semialdehyde dehydrogenase, mitochondrial OS=Homo sapiens GN=ALDH5A1 PE=1 SV=2;>sp|P51649-2|SSDH_HUMAN Isoform 2 of Succinate-semialdehyde dehydrogenase, mitochondrial OS=Homo sapiens GN=ALDH5A1;>tr|F5H328|F5H328_HUMAN Succi	57.214	2.4529e-15	4		3.01738	0.47963	0.00136877	2.86367	0	0	0			0	0	0	0	5.8	3	3	3.3973	46.897	4	753890	129160	624730	6.5	3	3	2.86632	40.945	3	582580	368580	214000	12	6	6	2.82119	23.672	6	1752500	1255600	496850
	833	Q8NC60	NOA1	Nitric oxide-associated protein 1	>sp|Q8NC60|NOA1_HUMAN Nitric oxide-associated protein 1 OS=Homo sapiens GN=NOA1 PE=1 SV=2	78.457	3.6999e-242	1		2.98606	0.475098	2.04465e-05	4.68938	36.7	17	17	2.8502	27.923	32	22754000	5651800	17102000	26.1	12	12	2.9285	35.85	36	27641000	6798100	20843000	31.4	16	16	3.25066	18.095	27	20106000	15364000	4742600	33.8	18	18	2.93023	26.121	31	39475000	29842000	9632600
	336	O75027;O75027-2;B4DGL8;O75027-3;E9PJR8;E9PNQ5	ABCB7	ATP-binding cassette sub-family B member 7, mitochondrial	>sp|O75027|ABCB7_HUMAN ATP-binding cassette sub-family B member 7, mitochondrial OS=Homo sapiens GN=ABCB7 PE=1 SV=2;>sp|O75027-2|ABCB7_HUMAN Isoform 2 of ATP-binding cassette sub-family B member 7, mitochondrial OS=Homo sapiens GN=ABCB7;>tr|B4DGL8|B4DGL8_H	82.64	8.8699e-131	6		2.9791	0.474085	0.000853749	3.06867	12.8	7	7	2.4913	30.766	9	3918600	1034600	2884000	9.6	5	5	2.5335	60.996	6	5646000	1542400	4103500	8.1	4	4	3.37268	53.355	5	1467600	1140300	327320	4.3	2	2	3.70014	71.013	4	2645500	2000600	644870
	133	D6RAR6;Q14CZ7	FASTKD3	FAST kinase domain-containing protein 3	>tr|D6RAR6|D6RAR6_HUMAN FAST kinase domain-containing protein 3 OS=Homo sapiens GN=FASTKD3 PE=4 SV=1;>sp|Q14CZ7|FAKD3_HUMAN FAST kinase domain-containing protein 3 OS=Homo sapiens GN=FASTKD3 PE=2 SV=2	69.381	2.8317e-29	2		2.94598	0.46923	0.00494174	2.30612	9.4	4	4	2.0707	67.233	4	1029200	253350	775860	14.1	6	6	2.2263	132.4	5	4067300	2964000	1103300	6.4	3	3	3.76577	7.7971	3	670910	522780	148130	1.6	1	1	4.33877	NaN	1	673180	524150	149040
	260	J3KN55;S4R3P5;Q96EY8	MMAB	Cob(I)yrinic acid a,c-diamide adenosyltransferase, mitochondrial	>tr|J3KN55|J3KN55_HUMAN Cob(I)yrinic acid a,c-diamide adenosyltransferase, mitochondrial OS=Homo sapiens GN=MMAB PE=1 SV=1;>tr|S4R3P5|S4R3P5_HUMAN Cob(I)yrinic acid a,c-diamide adenosyltransferase, mitochondrial OS=Homo sapiens GN=MMAB PE=1 SV=1;>sp|Q96EY8	17.672	8.459e-05	3		2.92707	0.466433	0.00745247	2.1277	6.3	1	1	2.2491	NaN	1	936960	276320	660640	6.3	1	1	1.8729	50.951	2	3330800	1086600	2244200	6.3	1	1	4.22226	NaN	1	185060	152120	32938	6.3	1	1	4.12729	NaN	1	821050	641080	179970
	396	P03915	MT-ND5	NADH-ubiquinone oxidoreductase chain 5	>sp|P03915|NU5M_HUMAN NADH-ubiquinone oxidoreductase chain 5 OS=Homo sapiens GN=MT-ND5 PE=1 SV=2	67.026	9.916e-117	1		2.92505	0.466134	0.000954993	3.02	11.8	6	6	2.3473	85.93	10	8363800	2740200	5623600	10	5	5	2.5945	68.607	10	10670000	2928400	7742100	9	5	5	3.67026	70.418	8	4085300	3236200	849120	11.8	6	6	3.27504	78.851	7	5630700	4213000	1417800
	818	Q8IYQ7	THNSL1	Threonine synthase-like 1	>sp|Q8IYQ7|THNS1_HUMAN Threonine synthase-like 1 OS=Homo sapiens GN=THNSL1 PE=1 SV=2	83.069	1.9484e-145	1		2.87452	0.458566	0.00156257	2.80616	3.5	2	2	2.4592	17.069	3	1332000	383690	948350	10.6	6	6	2.2301	39.815	7	4737800	1448100	3289700	14.5	8	8	3.74251	24.297	10	4778100	3728000	1050200	18.2	10	10	3.32646	33.187	11	7526200	5708700	1817500
	411	P05091-2;P05091;F8VP50;S4R3S4	ALDH2	Aldehyde dehydrogenase, mitochondrial	>sp|P05091-2|ALDH2_HUMAN Isoform 2 of Aldehyde dehydrogenase, mitochondrial OS=Homo sapiens GN=ALDH2;>sp|P05091|ALDH2_HUMAN Aldehyde dehydrogenase, mitochondrial OS=Homo sapiens GN=ALDH2 PE=1 SV=2	50.989	3.9958e-24	4		2.76356	0.441469	0.0026893	2.57036	6.4	2	2	2.4117	69.472	2	330160	59312	270850	3.6	1	1	2.102	NaN	1	872610	266730	605870	3.6	1	1	3.96825	NaN	1	113040	87025	26013	12.6	4	4	2.89948	13.94	4	1118100	861300	256830
	449	P12236;I7HJJ0	SLC25A6	ADP/ATP translocase 3	>sp|P12236|ADT3_HUMAN ADP/ATP translocase 3 OS=Homo sapiens GN=SLC25A6 PE=1 SV=4;>tr|I7HJJ0|I7HJJ0_HUMAN ADP/ATP translocase 3 (Fragment) OS=Homo sapiens GN=SLC25A6 PE=1 SV=1	32.866	1.8433e-33	2		2.75103	0.439495	7.2517e-05	4.13956	30.2	10	1	2.7458	NaN	1	4403900	1272500	3131400	26.8	8	1	2.4768	16.973	2	3467800	964470	2503300	26.8	8	1	2.86393	66.28	8	3268000	2375600	892470	26.8	8	1	2.94074	NaN	1	4811900	3534200	1277800
	687	Q13423;E9PCX7;D6RAI5;D6RHU2;D6RCR6	NNT	NAD(P) transhydrogenase, mitochondrial	>sp|Q13423|NNTM_HUMAN NAD(P) transhydrogenase, mitochondrial OS=Homo sapiens GN=NNT PE=1 SV=3;>tr|E9PCX7|E9PCX7_HUMAN NAD(P) transhydrogenase, mitochondrial OS=Homo sapiens GN=NNT PE=1 SV=1	113.89	2.2684e-36	5		2.72892	0.435991	0.000912032	3.03999	3.8	4	4	2.388	57.653	5	3033700	1279600	1754000	6.4	6	6	2.3224	60.764	6	1491300	500130	991170	3.3	3	3	3.53544	14.97	2	667940	553470	114470	10.8	9	9	2.82845	29.529	9	3611600	2599800	1011700
	743	Q5JTZ9	AARS2	Alanine--tRNA ligase, mitochondrial	>sp|Q5JTZ9|SYAM_HUMAN Alanine--tRNA ligase, mitochondrial OS=Homo sapiens GN=AARS2 PE=1 SV=1	107.34	1.0678e-145	1		2.72257	0.434978	0.00459759	2.33747	11.8	10	10	2.0136	20.156	10	4018500	1202700	2815800	12.6	9	9	2.0669	27.482	9	2333100	708170	1624900	21.1	16	16	3.61402	16.17	16	5762300	4488200	1274100	18.9	15	15	3.65283	39.135	15	7606900	5901300	1705600
	413	P05141;Q9H0C2	SLC25A5	ADP/ATP translocase 2	>sp|P05141|ADT2_HUMAN ADP/ATP translocase 2 OS=Homo sapiens GN=SLC25A5 PE=1 SV=7	32.852	3.6966e-87	2		2.65213	0.423595	0.00076424	3.11677	44.3	15	6	2.141	75.037	17	42256000	11380000	30876000	37.9	12	5	2.5097	59.752	13	33546000	8794300	24751000	37.9	12	5	3.14693	61.764	14	25571000	19539000	6031500	40.6	12	5	2.92586	68.133	17	42245000	31510000	10734000
	880	Q96EY1-2;Q96EY1;I3L1T6;Q96EY1-3	DNAJA3	DnaJ homolog subfamily A member 3, mitochondrial	>sp|Q96EY1-2|DNJA3_HUMAN Isoform 2 of DnaJ homolog subfamily A member 3, mitochondrial OS=Homo sapiens GN=DNAJA3;>sp|Q96EY1|DNJA3_HUMAN DnaJ homolog subfamily A member 3, mitochondrial OS=Homo sapiens GN=DNAJA3 PE=1 SV=2	49.611	1.7108e-51	4		2.64388	0.422241	0.00971315	2.01264	7.7	2	2	1.8084	19.967	2	2170100	759820	1410300	10.4	3	3	1.9191	40.921	3	3076800	946560	2130200	7.7	2	2	4.31648	18.822	2	1604500	1259600	344880	9.1	4	4	3.26168	107.01	4	3641700	2603800	1037900
	256	I3L1P8;Q02978;Q02978-2	SLC25A11	Mitochondrial 2-oxoglutarate/malate carrier protein	>tr|I3L1P8|I3L1P8_HUMAN Mitochondrial 2-oxoglutarate/malate carrier protein (Fragment) OS=Homo sapiens GN=SLC25A11 PE=1 SV=1;>sp|Q02978|M2OM_HUMAN Mitochondrial 2-oxoglutarate/malate carrier protein OS=Homo sapiens GN=SLC25A11 PE=1 SV=3;>sp|Q02978-2|M2OM_H	32.182	9.181e-55	3		2.61664	0.417744	8.33297e-05	4.0792	6.4	2	2	2.4104	103.21	2	1783300	484610	1298700	11.1	3	3	2.486	137.26	3	11959000	641020	11318000	22.3	6	6	2.79861	45.363	6	2971300	2207100	764200	22.3	6	6	2.7954	27.047	6	5189500	3743700	1445800
	673	Q10713;Q10713-2;Q5SXN0;Q5SXN9	PMPCA	Mitochondrial-processing peptidase subunit alpha	>sp|Q10713|MPPA_HUMAN Mitochondrial-processing peptidase subunit alpha OS=Homo sapiens GN=PMPCA PE=1 SV=2;>sp|Q10713-2|MPPA_HUMAN Isoform 2 of Mitochondrial-processing peptidase subunit alpha OS=Homo sapiens GN=PMPCA	58.252	5.836e-36	4		2.59212	0.413655	0.0372804	1.42852	4.8	2	2	2.8728	NaN	1	1234900	246100	988780	4.8	2	2	3.6041	25.714	3	2974900	779260	2195600	11.4	5	5	4.6516	120.87	6	3347100	1464400	1882700	4.8	2	2	0.937383	164.42	2	3639300	1257200	2382100
	291	Q9NP81;M0QWZ7;Q9NP81-2;E7EX87;M0R2C6;M0R259;B4DJM9;M0QX29;M0R2H5;M0R1C0	SARS2	Serine--tRNA ligase, mitochondrial	>sp|Q9NP81|SYSM_HUMAN Serine--tRNA ligase, mitochondrial OS=Homo sapiens GN=SARS2 PE=1 SV=1;>tr|M0QWZ7|M0QWZ7_HUMAN Serine--tRNA ligase, mitochondrial OS=Homo sapiens GN=SARS2 PE=1 SV=1;>sp|Q9NP81-2|SYSM_HUMAN Isoform 2 of Serine--tRNA ligase, mitochondria	58.282	0	10		2.55086	0.406687	0.00242064	2.61607	40.3	15	15	2.0314	17.428	17	16013000	4997300	11015000	39.2	14	14	2.0858	13.653	15	17256000	5095200	12160000	34.2	12	12	3.30896	18.149	14	11251000	8484400	2767100	35.7	13	13	3.01987	32.062	17	23704000	17303000	6400500
	582	P54886-2;P54886	ALDH18A1	Delta-1-pyrroline-5-carboxylate synthase;Glutamate 5-kinase;Gamma-glutamyl phosphate reductase	>sp|P54886-2|P5CS_HUMAN Isoform Short of Delta-1-pyrroline-5-carboxylate synthase OS=Homo sapiens GN=ALDH18A1;>sp|P54886|P5CS_HUMAN Delta-1-pyrroline-5-carboxylate synthase OS=Homo sapiens GN=ALDH18A1 PE=1 SV=2	87.088	2.6448e-189	2		2.51658	0.40081	0.00178107	2.74932	36.9	22	22	2.1814	67.226	81	63648000	22117000	41531000	38.6	24	24	2.0365	57.923	80	80580000	31537000	49043000	35.2	22	22	3.27955	50.863	76	53631000	39953000	13678000	34.2	23	23	2.753	46.564	77	86894000	61961000	24932000
	538	P41250	GARS	Glycine--tRNA ligase	>sp|P41250|SYG_HUMAN Glycine--tRNA ligase OS=Homo sapiens GN=GARS PE=1 SV=3	83.165	6.7728e-07	1		2.51025	0.399718	0.0150238	1.82322	0	0	0			0	0	0	0	2	1	1	1.8107	NaN	1	692660	176760	515900	4.1	2	2	3.07844	NaN	1	244700	188900	55794	1.4	1	1	2.83776	NaN	1	212530	164010	48515
	914	Q9BU61;Q9BU61-2	NDUFAF3	NADH dehydrogenase [ubiquinone] 1 alpha subcomplex assembly factor 3	>sp|Q9BU61|NDUF3_HUMAN NADH dehydrogenase [ubiquinone] 1 alpha subcomplex assembly factor 3 OS=Homo sapiens GN=NDUFAF3 PE=1 SV=1;>sp|Q9BU61-2|NDUF3_HUMAN Isoform b of NADH dehydrogenase [ubiquinone] 1 alpha subcomplex assembly factor 3 OS=Homo sapiens GN=N	20.35	4.9598e-13	2		2.50944	0.399577	0.00590555	2.22874	6	1	1	1.8537	NaN	1	861920	333470	528450	32.6	4	4	2.0971	23.305	4	4753000	1481600	3271400	6	1	1	4.01139	NaN	1	632760	516170	116590	6	1	1	2.54304	NaN	1	1246100	897490	348580
	241	H3BS70;Q96DC0;P42126-2;P42126	ECI1;DCI	Enoyl-CoA delta isomerase 1, mitochondrial	>tr|H3BS70|H3BS70_HUMAN Enoyl-CoA delta isomerase 1, mitochondrial (Fragment) OS=Homo sapiens GN=ECI1 PE=1 SV=1;>tr|Q96DC0|Q96DC0_HUMAN DCI protein OS=Homo sapiens GN=DCI PE=1 SV=1;>sp|P42126-2|ECI1_HUMAN Isoform 2 of Enoyl-CoA delta isomerase 1, mitochond	24.704	2.2481e-22	4		2.49576	0.397203	0.00124222	2.9058	10.3	2	2	2.3423	76.613	2	1180500	370560	809890	10.3	2	2	2.0537	49.442	2	1035400	300010	735430	10.3	2	2	3.23541	72.506	2	689070	512920	176150	10.3	2	2	2.4929	0.81815	2	964900	677650	287250
	900	Q9BPW8;H7C2U6;C9JDV8;F8WCR5	NIPSNAP1	Protein NipSnap homolog 1	>sp|Q9BPW8|NIPS1_HUMAN Protein NipSnap homolog 1 OS=Homo sapiens GN=NIPSNAP1 PE=1 SV=1;>tr|H7C2U6|H7C2U6_HUMAN Protein NipSnap homolog 1 (Fragment) OS=Homo sapiens GN=NIPSNAP1 PE=1 SV=1	33.31	4.3249e-18	4		2.49564	0.397181	0.00849943	2.07061	0	0	0			0	0	0	0	4.9	1	1	1.9913	NaN	1	406590	116340	290250	11.6	3	3	3.04146	34.095	3	757060	566070	190990	3.2	1	1	2.56641	NaN	1	524560	400890	123670
	479	P21912	SDHB	Succinate dehydrogenase [ubiquinone] iron-sulfur subunit, mitochondrial	>sp|P21912|SDHB_HUMAN Succinate dehydrogenase [ubiquinone] iron-sulfur subunit, mitochondrial OS=Homo sapiens GN=SDHB PE=1 SV=3	31.629	3.2429e-18	1		2.47457	0.393499	0.000884077	3.05351	8.2	2	2	2.4981	116.8	3	2693600	943380	1750300	12.1	3	3	2.0429	65.563	3	2204300	718460	1485800	8.2	2	2	3.05773	136.11	2	1454500	996400	458120	11.8	3	3	2.40292	105.51	4	4249100	2916800	1332300
	188	F5GYT7;F5H5U6;F5H8C8;F5GXS8;F5GYM3;H0YG47;Q96PU8-5;Q96PU8-9;Q96PU8-8;Q96PU8-6;Q96PU8-3;Q96PU8	QKI	Protein quaking	>tr|F5GYT7|F5GYT7_HUMAN Protein quaking OS=Homo sapiens GN=QKI PE=1 SV=1;>tr|F5H5U6|F5H5U6_HUMAN Protein quaking (Fragment) OS=Homo sapiens GN=QKI PE=1 SV=2;>tr|F5H8C8|F5H8C8_HUMAN Protein quaking (Fragment) OS=Homo sapiens GN=QKI PE=1 SV=1;>tr|F5GXS8|F5GX	4.6222	0.00016635	12		2.46565	0.391931	0.0325334	1.48767	0	0	0			0	0	0	0	0	0	0			0	0	0	0	41.5	1	1	2.70717	NaN	1	1308700	856260	452420	41.5	1	1	2.24568	NaN	1	1621200	1117500	503770
	886	Q96IX5	USMG5	Up-regulated during skeletal muscle growth protein 5	>sp|Q96IX5|USMG5_HUMAN Up-regulated during skeletal muscle growth protein 5 OS=Homo sapiens GN=USMG5 PE=1 SV=1	6.4575	2.7642e-50	1		2.45456	0.389973	4.59441e-05	4.33777	17.2	1	1	2.3905	NaN	1	532450	115680	416770	44.8	3	3	2.3809	92.376	3	2741600	770130	1971500	43.1	2	2	2.69571	73.745	2	878320	614970	263340	27.6	2	2	2.36586	19.374	2	1642400	1160000	482340
	345	O75438;O75438-2	NDUFB1	NADH dehydrogenase [ubiquinone] 1 beta subcomplex subunit 1	>sp|O75438|NDUB1_HUMAN NADH dehydrogenase [ubiquinone] 1 beta subcomplex subunit 1 OS=Homo sapiens GN=NDUFB1 PE=1 SV=1	6.9611	6.2376e-22	2		2.33585	0.368446	0.00200747	2.69735	13.8	1	1	2.6609	66.106	2	1003600	202630	800920	34.5	3	3	1.8349	128.35	2	2839100	999590	1839500	34.5	3	3	2.12761	22.162	2	941530	644190	297340	34.5	3	3	2.86582	37.93	4	5241100	3757900	1483200
	1011	Q9UJS0;Q9UJS0-2;F5GX33;O75746-2;O75746;R4GN64	SLC25A13	Calcium-binding mitochondrial carrier protein Aralar2	>sp|Q9UJS0|CMC2_HUMAN Calcium-binding mitochondrial carrier protein Aralar2 OS=Homo sapiens GN=SLC25A13 PE=1 SV=2;>sp|Q9UJS0-2|CMC2_HUMAN Isoform 2 of Calcium-binding mitochondrial carrier protein Aralar2 OS=Homo sapiens GN=SLC25A13;>tr|F5GX33|F5GX33_HUMAN	74.175	3.5737e-122	6		2.3167	0.36487	0.000741413	3.12994	24.7	13	13	2.085	31.501	14	6696200	2111800	4584400	29.2	15	15	2.0207	20.284	15	21770000	7363800	14406000	23.6	12	12	2.83857	28.078	11	4771400	3569600	1201900	25.6	14	14	2.40865	48.039	15	12344000	8744300	3599400
	445	P11182;Q5VVL7	DBT	Lipoamide acyltransferase component of branched-chain alpha-keto acid dehydrogenase complex, mitochondrial	>sp|P11182|ODB2_HUMAN Lipoamide acyltransferase component of branched-chain alpha-keto acid dehydrogenase complex, mitochondrial OS=Homo sapiens GN=DBT PE=1 SV=3;>tr|Q5VVL7|Q5VVL7_HUMAN Lipoamide acyltransferase component of branched-chain alpha-keto acid	53.486	3.5948e-302	2		2.30803	0.363242	0.00302907	2.51869	57.3	22	22	1.8447	79.234	69	178880000	59128000	119750000	62.4	24	24	1.9069	71.468	83	247520000	82789000	164730000	64.5	27	27	2.91971	74.786	82	111290000	82192000	29099000	53.9	23	23	2.76297	69.477	79	170150000	123930000	46211000
	952	Q9H9B4;D6RDG7;S4R2X2;D6RFI0;D6RAE9;H0Y9J5	SFXN1	Sideroflexin-1	>sp|Q9H9B4|SFXN1_HUMAN Sideroflexin-1 OS=Homo sapiens GN=SFXN1 PE=1 SV=4;>tr|D6RDG7|D6RDG7_HUMAN Sideroflexin-1 (Fragment) OS=Homo sapiens GN=SFXN1 PE=1 SV=1;>tr|S4R2X2|S4R2X2_HUMAN Sideroflexin-1 OS=Homo sapiens GN=SFXN1 PE=1 SV=1;>tr|D6RFI0|D6RFI0_HUMAN	35.619	1.8713e-95	6		2.30702	0.363052	0.00048708	3.3124	27.3	8	8	2.0383	68.589	13	11656000	3800000	7855800	31.1	9	9	2.1055	66.098	19	15944000	4656900	11287000	33.2	10	10	2.6124	67.865	17	9045900	6526300	2519600	27.3	8	8	2.52666	44.315	14	14580000	10501000	4078700
	536	P40926;P40926-2;G3XAL0	MDH2	Malate dehydrogenase, mitochondrial;Malate dehydrogenase	>sp|P40926|MDHM_HUMAN Malate dehydrogenase, mitochondrial OS=Homo sapiens GN=MDH2 PE=1 SV=3;>sp|P40926-2|MDHM_HUMAN Isoform 2 of Malate dehydrogenase, mitochondrial OS=Homo sapiens GN=MDH2;>tr|G3XAL0|G3XAL0_HUMAN Malate dehydrogenase OS=Homo sapiens GN=MDH	35.503	1.9678e-134	3		2.29305	0.360414	0.00236042	2.62701	45	11	11	1.8909	55.81	15	13660000	4741700	8918200	43.5	11	11	1.8892	67.457	14	15632000	5371200	10261000	40.5	10	10	2.80198	83.064	12	8190700	6063000	2127700	42.9	10	10	2.76213	73.703	12	14648000	10621000	4026900
	585	P55084-2;P55084;F5GZQ3;C9JEY0;C9JE81;B5MD38	HADHB	Trifunctional enzyme subunit beta, mitochondrial;3-ketoacyl-CoA thiolase	>sp|P55084-2|ECHB_HUMAN Isoform 2 of Trifunctional enzyme subunit beta, mitochondrial OS=Homo sapiens GN=HADHB;>sp|P55084|ECHB_HUMAN Trifunctional enzyme subunit beta, mitochondrial OS=Homo sapiens GN=HADHB PE=1 SV=3;>tr|F5GZQ3|F5GZQ3_HUMAN 3-ketoacyl-CoA	48.879	4.1459e-15	6		2.26443	0.354959	0.0227588	1.64285	4	2	2	2.7965	9.7	2	2489900	736970	1752900	7.5	3	3	1.5757	16.251	2	3189300	751320	2438000	2	1	1	2.63505	NaN	1	504770	364430	140330	0	0	0			0	0	0	0
	982	Q9NX40;D6RDK6;D6RBN5;D6RG39;D6RIT9;Q9NX40-3;Q9NX40-2;Q9NX40-4;D6RI08;D6RDK1;D6RIV2;D6R9T5;D6RDI5;D6RA54;D6RC55;D6R918;D6RBC5;D6RF07	OCIAD1	OCIA domain-containing protein 1	>sp|Q9NX40|OCAD1_HUMAN OCIA domain-containing protein 1 OS=Homo sapiens GN=OCIAD1 PE=1 SV=1;>tr|D6RDK6|D6RDK6_HUMAN OCIA domain-containing protein 1 (Fragment) OS=Homo sapiens GN=OCIAD1 PE=1 SV=1;>tr|D6RBN5|D6RBN5_HUMAN OCIA domain-containing protein 1 OS=	27.626	3.4283e-86	18		2.26113	0.354326	0.000393387	3.40518	38.8	11	11	2.0234	96.45	17	27020000	8769500	18251000	36.7	11	11	2.0912	76.161	21	20264000	6256600	14008000	35.5	9	9	2.6338	71.583	19	12675000	9196300	3479100	32.2	8	8	2.34555	67.255	17	21196000	14542000	6653200
	1043	Q9Y6H1;Q5T1J5	CHCHD2;CHCHD2P9	Coiled-coil-helix-coiled-coil-helix domain-containing protein 2, mitochondrial;Putative coiled-coil-helix-coiled-coil-helix domain-containing protein CHCHD2P9, mitochondrial	>sp|Q9Y6H1|CHCH2_HUMAN Coiled-coil-helix-coiled-coil-helix domain-containing protein 2, mitochondrial OS=Homo sapiens GN=CHCHD2 PE=1 SV=1;>sp|Q5T1J5|CHCH9_HUMAN Putative coiled-coil-helix-coiled-coil-helix domain-containing protein CHCHD2P9, mitochondrial	15.512	6.0742e-41	2		2.25782	0.353689	0.00263955	2.57847	15.2	2	2	2.304	11.219	2	1658600	430210	1228400	15.2	2	2	2.8193	21.274	2	1872300	502540	1369700	15.2	2	2	2.42448	16.535	2	1519100	1044800	474280	8.6	1	1	1.65011	45.151	2	1005800	627100	378730
	537	P40939;H0YFD6;P40939-2	HADHA	Trifunctional enzyme subunit alpha, mitochondrial;Long-chain enoyl-CoA hydratase;Long chain 3-hydroxyacyl-CoA dehydrogenase	>sp|P40939|ECHA_HUMAN Trifunctional enzyme subunit alpha, mitochondrial OS=Homo sapiens GN=HADHA PE=1 SV=2	82.999	1.2093e-212	3		2.24793	0.351784	0.000216297	3.66495	21.6	11	11	1.9899	27.824	12	4870100	1653600	3216500	26.1	13	13	2.2125	21.038	13	15328000	4613500	10714000	23.2	12	12	2.42783	12.432	13	4988300	3604900	1383300	23.3	12	12	2.38892	20.895	13	11425000	7867300	3557800
	240	H3BTB7;Q5JPH6;H3BRF5	EARS2	Probable glutamate--tRNA ligase, mitochondrial	>tr|H3BTB7|H3BTB7_HUMAN Probable glutamate--tRNA ligase, mitochondrial OS=Homo sapiens GN=EARS2 PE=1 SV=1;>sp|Q5JPH6|SYEM_HUMAN Probable glutamate--tRNA ligase, mitochondrial OS=Homo sapiens GN=EARS2 PE=1 SV=2;>tr|H3BRF5|H3BRF5_HUMAN KIAA1970 protein, isof	56.825	7.8704e-14	3		2.24587	0.351384	0.00256513	2.59089	4	2	2	2.4196	35.781	2	944490	291740	652750	9.5	4	4	1.9765	14.893	4	1632900	505370	1127600	0	0	0			0	0	0	0	4.5	2	2	2.36871	4.1376	2	1016200	706560	309670
	509	P30837	ALDH1B1	Aldehyde dehydrogenase X, mitochondrial	>sp|P30837|AL1B1_HUMAN Aldehyde dehydrogenase X, mitochondrial OS=Homo sapiens GN=ALDH1B1 PE=1 SV=3	57.206	1.1303e-27	1		2.22389	0.347113	0.00441448	2.35512	12.6	5	5	1.8602	21.681	5	1630800	509440	1121400	10.1	4	4	1.7067	26.707	4	2216200	935330	1280900	7.9	3	3	2.75437	28.203	3	715430	469790	245640	7.2	3	3	2.79712	40.693	2	1740800	1360700	380030
	898	Q99714;Q99714-2;Q5H928	HSD17B10	3-hydroxyacyl-CoA dehydrogenase type-2	>sp|Q99714|HCD2_HUMAN 3-hydroxyacyl-CoA dehydrogenase type-2 OS=Homo sapiens GN=HSD17B10 PE=1 SV=3;>sp|Q99714-2|HCD2_HUMAN Isoform 2 of 3-hydroxyacyl-CoA dehydrogenase type-2 OS=Homo sapiens GN=HSD17B10;>tr|Q5H928|Q5H928_HUMAN 3-hydroxyacyl-CoA dehydrogena	26.923	1.7456e-275	3		2.20433	0.343277	0.00337901	2.47121	75.5	11	11	1.8549	125.35	29	50763000	17817000	32946000	69	11	11	1.7467	87.378	30	62318000	22772000	39546000	78.9	13	13	2.75885	113.29	35	68468000	49069000	19398000	48.7	9	9	2.64145	66.746	27	37054000	26427000	10628000
	994	Q9P032	NDUFAF4	NADH dehydrogenase [ubiquinone] 1 alpha subcomplex assembly factor 4	>sp|Q9P032|NDUF4_HUMAN NADH dehydrogenase [ubiquinone] 1 alpha subcomplex assembly factor 4 OS=Homo sapiens GN=NDUFAF4 PE=1 SV=1	20.266	3.5285e-07	1		2.19682	0.341794	0.00436687	2.35983	8	1	1	2.764	157.43	2	4555200	1286200	3269000	13.7	2	2	1.5584	70.796	2	5143700	1693700	3450000	17.1	2	2	2.54628	103	3	7078600	5100800	1977800	17.1	2	2	2.1235	97.236	2	3658600	2873400	785190
	362	O95139;O95139-2	NDUFB6	NADH dehydrogenase [ubiquinone] 1 beta subcomplex subunit 6	>sp|O95139|NDUB6_HUMAN NADH dehydrogenase [ubiquinone] 1 beta subcomplex subunit 6 OS=Homo sapiens GN=NDUFB6 PE=1 SV=3;>sp|O95139-2|NDUB6_HUMAN Isoform 2 of NADH dehydrogenase [ubiquinone] 1 beta subcomplex subunit 6 OS=Homo sapiens GN=NDUFB6	15.489	1.3358e-13	2		2.12919	0.328215	0.00303173	2.51831	18	2	2	1.9268	5.0557	3	3803200	1213600	2589700	18	2	2	1.6706	6.3847	2	1644100	579160	1065000	10.2	1	1	2.34962	NaN	1	1414100	955320	458800	10.2	1	1	2.71739	92.603	2	2193600	1688500	505100
	394	P03897	MT-ND3	NADH-ubiquinone oxidoreductase chain 3	>sp|P03897|NU3M_HUMAN NADH-ubiquinone oxidoreductase chain 3 OS=Homo sapiens GN=MT-ND3 PE=1 SV=1	13.186	4.6878e-06	1		2.11692	0.325705	0.023305	1.63255	0	0	0			0	0	0	0	13	1	1	1.535	NaN	1	696320	263590	432730	13	1	1	2.76289	NaN	1	229300	168620	60672	13	1	1	2.23689	NaN	1	656810	458780	198030
	510	P31040;P31040-2;D6RFM5;P31040-3;H0Y8X1	SDHA	Succinate dehydrogenase [ubiquinone] flavoprotein subunit, mitochondrial	>sp|P31040|SDHA_HUMAN Succinate dehydrogenase [ubiquinone] flavoprotein subunit, mitochondrial OS=Homo sapiens GN=SDHA PE=1 SV=2;>sp|P31040-2|SDHA_HUMAN Isoform 2 of Succinate dehydrogenase [ubiquinone] flavoprotein subunit, mitochondrial OS=Homo sapiens G	72.691	1.0373e-122	5		2.09941	0.322097	0.00101389	2.99401	13.3	7	7	1.7694	47.9	12	3746100	1352800	2393400	18.5	10	10	2.0094	32.084	16	11049000	3813500	7235500	19.7	10	10	2.52188	32.29	17	5154400	3635400	1518900	17.3	9	9	2.16657	36.045	14	7114200	4795800	2318400
	542	P42704;B8ZZ38;C9JCA9;H7C3W8;Q9NP80-3;Q9NP80-2;J3KPL1;Q9NP80	LRPPRC	Leucine-rich PPR motif-containing protein, mitochondrial	>sp|P42704|LPPRC_HUMAN Leucine-rich PPR motif-containing protein, mitochondrial OS=Homo sapiens GN=LRPPRC PE=1 SV=3	157.9	0	8		2.09839	0.321886	0.000586949	3.2314	81.4	119	119	1.8988	47.933	445	7092600000	2455200000	4637400000	81.6	125	125	1.882	56.123	509	6040000000	2616700000	3423200000	81.6	124	124	2.35361	56.427	448	5442600000	3887000000	1555600000	80.9	119	119	2.30521	70.926	448	8662500000	6269200000	2393300000
	648	Q00325-2;Q00325;F8VVM2;F8VWQ0;F8VZL5;F8VWR4	SLC25A3	Phosphate carrier protein, mitochondrial	>sp|Q00325-2|MPCP_HUMAN Isoform B of Phosphate carrier protein, mitochondrial OS=Homo sapiens GN=SLC25A3;>sp|Q00325|MPCP_HUMAN Phosphate carrier protein, mitochondrial OS=Homo sapiens GN=SLC25A3 PE=1 SV=2;>tr|F8VVM2|F8VVM2_HUMAN Phosphate carrier protein,	39.958	7.903e-98	6		2.08187	0.318453	0.00264417	2.57771	26.6	8	8	1.7545	157.18	10	17640000	7442900	10197000	25.5	7	7	1.763	89.846	8	13877000	4978400	8899100	31.6	9	9	2.55997	63.193	13	8611800	6150100	2461700	29.1	8	8	2.37231	74.251	10	16034000	10626000	5408300
	325	O43819;C9JBU1	SCO2	Protein SCO2 homolog, mitochondrial	>sp|O43819|SCO2_HUMAN Protein SCO2 homolog, mitochondrial OS=Homo sapiens GN=SCO2 PE=1 SV=3	29.81	2.2636e-10	2		2.07762	0.317567	0.0151461	1.8197	17.3	4	4	2.014	88.571	4	1407200	466510	940700	0	0	0			0	0	0	0	0	0	0			0	0	0	0	3	1	1	2.14326	NaN	1	475350	321640	153720
	949	Q9H845;H0Y8Z9;D6RCD8	ACAD9	Acyl-CoA dehydrogenase family member 9, mitochondrial	>sp|Q9H845|ACAD9_HUMAN Acyl-CoA dehydrogenase family member 9, mitochondrial OS=Homo sapiens GN=ACAD9 PE=1 SV=1;>tr|H0Y8Z9|H0Y8Z9_HUMAN Acyl-CoA dehydrogenase family member 9, mitochondrial (Fragment) OS=Homo sapiens GN=ACAD9 PE=1 SV=1	68.76	1.6325e-181	3		2.07091	0.316161	0.0023525	2.62847	34.1	17	17	1.8103	28.023	18	9597300	3541300	6056100	29.8	15	15	1.7327	76.963	16	26146000	19417000	6729000	25.6	14	14	2.61192	110.61	19	22583000	19933000	2650500	30.3	15	15	2.24497	73.096	20	60987000	56065000	4922800
	1025	U3KQJ1;Q9Y2S7	POLDIP2	Polymerase delta-interacting protein 2	>tr|U3KQJ1|U3KQJ1_HUMAN Polymerase delta-interacting protein 2 OS=Homo sapiens GN=POLDIP2 PE=1 SV=1;>sp|Q9Y2S7|PDIP2_HUMAN Polymerase delta-interacting protein 2 OS=Homo sapiens GN=POLDIP2 PE=1 SV=1	41.934	3.3375e-28	2		2.06191	0.31427	0.00313495	2.50377	9.8	3	3	1.8752	133.04	3	3347100	1897100	1450000	13.9	4	4	1.7653	120.94	4	6722900	3539200	3183700	12.8	4	4	2.79462	49.17	5	2292600	1667400	625190	16.1	5	5	1.95385	29.367	5	3551300	2331600	1219700
	931	Q9GZT3-2;Q9GZT3;H0YJ40;G3V4X6;G3V2S9;H0YJW7;H0YJ07;H0YJU7;H0YJI1	SLIRP	SRA stem-loop-interacting RNA-binding protein, mitochondrial	>sp|Q9GZT3-2|SLIRP_HUMAN Isoform 2 of SRA stem-loop-interacting RNA-binding protein, mitochondrial OS=Homo sapiens GN=SLIRP;>sp|Q9GZT3|SLIRP_HUMAN SRA stem-loop-interacting RNA-binding protein, mitochondrial OS=Homo sapiens GN=SLIRP PE=1 SV=1;>tr|H0YJ40|H0	12.122	2.8067e-129	9		2.0618	0.314247	0.000476453	3.32198	80.4	11	11	1.8575	81.735	30	286580000	97596000	188990000	81.3	11	11	1.8978	84.5	42	644050000	217340000	426710000	80.4	9	9	2.34935	75.986	21	143200000	99624000	43575000	81.3	11	11	2.18202	74.949	38	481700000	331330000	150370000
	55	Q96CU9-2;B4DXM1;Q96CU9-3;Q96CU9	FOXRED1	FAD-dependent oxidoreductase domain-containing protein 1	>sp|Q96CU9-2|FXRD1_HUMAN Isoform 2 of FAD-dependent oxidoreductase domain-containing protein 1 OS=Homo sapiens GN=FOXRED1;>tr|B4DXM1|B4DXM1_HUMAN FAD-dependent oxidoreductase domain-containing protein 1 OS=Homo sapiens GN=FOXRED1 PE=1 SV=1;>sp|Q96CU9-3|FXR	30.658	7.1024e-07	4		2.05803	0.313452	0.0218002	1.66154	4.7	1	1	2.2731	NaN	1	131630	42829	88804	4.7	1	1	1.5135	NaN	1	128860	56504	72360	8.7	2	2	2.5337	NaN	1	71019	59740	11278	0	0	0			0	0	0	0
	439	P10809;E7ESH4;E7EXB4;B7Z712;C9JCQ4;C9JL25;C9JL19;C9J0S9	HSPD1	60 kDa heat shock protein, mitochondrial	>sp|P10809|CH60_HUMAN 60 kDa heat shock protein, mitochondrial OS=Homo sapiens GN=HSPD1 PE=1 SV=2	61.054	0	8		2.04724	0.311168	0.00304152	2.51691	70.7	43	43	1.7378	26.777	129	460950000	160380000	300580000	72.3	45	45	1.6891	45.77	156	1114700000	398760000	715920000	73.8	46	46	2.58859	44.833	123	455660000	321190000	134480000	69.8	41	41	2.31182	48.708	125	662610000	456250000	206360000
	232	H0YMU3;H0YL72;P50213;H0YLI6;B7Z9J8;P50213-2;H0YM64;H0YKD0	IDH3A	Isocitrate dehydrogenase [NAD] subunit alpha, mitochondrial	>tr|H0YMU3|H0YMU3_HUMAN Isocitrate dehydrogenase [NAD] subunit alpha, mitochondrial (Fragment) OS=Homo sapiens GN=IDH3A PE=1 SV=1;>tr|H0YL72|H0YL72_HUMAN Isocitrate dehydrogenase [NAD] subunit alpha, mitochondrial OS=Homo sapiens GN=IDH3A PE=1 SV=1;>sp|P50	19.247	4.0512e-10	8		2.03586	0.308748	0.00487719	2.31183	6.3	1	1	1.6401	NaN	1	272590	107680	164910	18.9	2	2	1.7267	59.442	2	1260100	456380	803680	18.9	2	2	2.78025	55.852	2	704010	516410	187600	18.9	2	2	2.18183	29.382	2	979860	689210	290650
	383	P00846	MT-ATP6	ATP synthase subunit a	>sp|P00846|ATP6_HUMAN ATP synthase subunit a OS=Homo sapiens GN=MT-ATP6 PE=1 SV=1	24.817	2.3234e-06	1		2.01874	0.305081	0.0135669	1.86752	4.4	1	1	2.0173	NaN	1	3855000	1286300	2568700	4.4	1	1	1.8181	NaN	1	3925600	1393100	2532500	4.4	1	1	1.39907	108.28	2	2361700	1862800	498810	4.4	1	1	3.23666	62.543	2	5207200	3861100	1346100
	227	O43674;H0Y886;H7C568;O43674-2;E7EWP0	NDUFB5	NADH dehydrogenase [ubiquinone] 1 beta subcomplex subunit 5, mitochondrial	>sp|O43674|NDUB5_HUMAN NADH dehydrogenase [ubiquinone] 1 beta subcomplex subunit 5, mitochondrial OS=Homo sapiens GN=NDUFB5 PE=1 SV=1;>tr|H0Y886|H0Y886_HUMAN NADH dehydrogenase [ubiquinone] 1 beta subcomplex subunit 5, mitochondrial (Fragment) OS=Homo sapi	21.75	8.3018e-05	5		2.01822	0.304969	0.0226892	1.64418	4.2	1	1	1.5164	NaN	1	2004600	781370	1223200	0	0	0			0	0	0	0	4.2	1	1	2.57202	25.569	2	1288900	937780	351140	8.5	2	2	2.10775	13.939	3	2642100	1849700	792320
	247	H7C3H2;Q9HD20-2;Q9HD20	ATP13A1	Probable cation-transporting ATPase 13A1	>tr|H7C3H2|H7C3H2_HUMAN Manganese-transporting ATPase 13A1 (Fragment) OS=Homo sapiens GN=ATP13A1 PE=1 SV=1;>sp|Q9HD20-2|AT131_HUMAN Isoform B of Manganese-transporting ATPase 13A1 OS=Homo sapiens GN=ATP13A1;>sp|Q9HD20|AT131_HUMAN Manganese-transporting ATP	20.601	1.5834e-06	3		2.01655	0.304608	0.00114327	2.94185	8.6	1	1	1.9899	66.133	2	935610	255630	679990	8.6	1	1	1.9208	63.983	2	5799700	1934200	3865500	8.6	1	1	2.14542	55.761	2	5545900	3778100	1767800	0	0	0			0	0	0	0
	492	P24752;E9PRQ6;G3XAB4;H0YEL7	ACAT1	Acetyl-CoA acetyltransferase, mitochondrial	>sp|P24752|THIL_HUMAN Acetyl-CoA acetyltransferase, mitochondrial OS=Homo sapiens GN=ACAT1 PE=1 SV=1;>tr|E9PRQ6|E9PRQ6_HUMAN Acetyl-CoA acetyltransferase, mitochondrial OS=Homo sapiens GN=ACAT1 PE=1 SV=1;>tr|G3XAB4|G3XAB4_HUMAN Acetyl-CoA acetyltransferase	45.199	8.8728e-53	4		2.0119	0.303605	0.00861609	2.06469	4	1	1	1.4314	NaN	1	793410	319520	473890	6.8	2	2	1.9486	37.681	2	2355500	819910	1535600	4	1	1	2.92757	NaN	1	389470	286900	102580	7	2	2	2.00646	81.968	2	1860300	1038800	821490
	348	O75489;B4DFM8;E9PS48;E9PKL8;G3V194	NDUFS3	NADH dehydrogenase [ubiquinone] iron-sulfur protein 3, mitochondrial	>sp|O75489|NDUS3_HUMAN NADH dehydrogenase [ubiquinone] iron-sulfur protein 3, mitochondrial OS=Homo sapiens GN=NDUFS3 PE=1 SV=1	30.241	7.5134e-221	5		2.01106	0.303426	0.00286576	2.54276	40.9	12	12	1.6886	103.2	14	42351000	15787000	26564000	40.9	11	11	1.7475	113.77	14	41697000	15028000	26669000	44.7	12	12	2.5518	95.551	15	25761000	18456000	7305300	45.1	13	13	2.17226	58.705	16	56843000	39169000	17674000
	237	H3BPJ9;O96000;Q96II6;H3BV16	NDUFB10	NADH dehydrogenase [ubiquinone] 1 beta subcomplex subunit 10	>tr|H3BPJ9|H3BPJ9_HUMAN NADH dehydrogenase [ubiquinone] 1 beta subcomplex subunit 10 OS=Homo sapiens GN=NDUFB10 PE=1 SV=1;>sp|O96000|NDUBA_HUMAN NADH dehydrogenase [ubiquinone] 1 beta subcomplex subunit 10 OS=Homo sapiens GN=NDUFB10 PE=1 SV=3;>tr|Q96II6|Q9	19.258	1.324e-24	4		1.9967	0.300312	0.00459293	2.33791	21.7	3	3	1.5852	133.66	4	11036000	3790400	7245600	22.4	3	3	1.6881	147.2	3	7863400	2788300	5075200	22.4	3	3	2.54001	98.128	5	12148000	8405700	3742500	28.6	4	4	2.33847	89.382	9	10101000	7101700	2999800
	395	P03905	MT-ND4	NADH-ubiquinone oxidoreductase chain 4	>sp|P03905|NU4M_HUMAN NADH-ubiquinone oxidoreductase chain 4 OS=Homo sapiens GN=MT-ND4 PE=1 SV=1	51.58	1.5366e-11	1		1.99164	0.299211	0.00607603	2.21638	7.6	3	3	1.4692	129.09	4	6043000	2604200	3438800	2.2	1	1	1.7669	137.85	2	4664900	1696300	2968600	2.2	1	1	2.35649	77.446	2	2148700	1506100	642610	8.3	3	3	2.57208	62.944	6	6930200	4826400	2103800
	973	Q9NVI7-2;Q9NVI7;H0Y2W2;Q9NVI7-3;Q5SV16;Q5T9A4-2;A6NFL3	ATAD3A	ATPase family AAA domain-containing protein 3A	>sp|Q9NVI7-2|ATD3A_HUMAN Isoform 2 of ATPase family AAA domain-containing protein 3A OS=Homo sapiens GN=ATAD3A;>sp|Q9NVI7|ATD3A_HUMAN ATPase family AAA domain-containing protein 3A OS=Homo sapiens GN=ATAD3A PE=1 SV=2;>tr|H0Y2W2|H0Y2W2_HUMAN ATPase family A	66.217	7.3109e-239	7		1.9859	0.297958	0.00538977	2.26843	40.4	20	4	1.5711	34.843	6	5461400	2033800	3427500	48.1	23	6	1.7111	12.135	8	13674000	4830000	8844500	42	20	4	2.66852	38.748	3	3458200	2319400	1138800	38.2	19	6	2.16812	28.919	9	11709000	7838300	3870700
	136	E2QRM6;Q9H2U2;Q9H2U2-2;D6R967;B4DFH3;H0Y9D8;Q9H2U2-6;Q9H2U2-3;Q9H2U2-4;D6RGV9	PPA2	Inorganic pyrophosphatase 2, mitochondrial	>tr|E2QRM6|E2QRM6_HUMAN Inorganic pyrophosphatase 2, mitochondrial OS=Homo sapiens GN=PPA2 PE=1 SV=1;>sp|Q9H2U2|IPYR2_HUMAN Inorganic pyrophosphatase 2, mitochondrial OS=Homo sapiens GN=PPA2 PE=1 SV=2;>sp|Q9H2U2-2|IPYR2_HUMAN Isoform 2 of Inorganic pyropho	35.731	5.4139e-13	10		1.9796	0.296578	0.00916073	2.03807	4.1	1	1	2.0244	NaN	1	272500	93057	179440	9.2	2	2	1.3716	33.3	2	473910	154030	319880	11.4	3	3	2.83431	117.79	2	508140	340930	167200	11.4	3	3	1.95137	61.368	2	581790	363090	218700
	938	Q9H2K0	MTIF3	Translation initiation factor IF-3, mitochondrial	>sp|Q9H2K0|IF3M_HUMAN Translation initiation factor IF-3, mitochondrial OS=Homo sapiens GN=MTIF3 PE=1 SV=4	31.725	6.6125e-06	1		1.96431	0.29321	0.0150467	1.82256	0	0	0			0	0	0	0	6.5	1	1	1.6016	NaN	1	256960	87624	169340	5.8	1	1	1.9945	NaN	1	572370	371860	200500	5.8	1	1	2.3727	NaN	1	820720	597520	223200
	181	E9PPW7;O00217;E9PN51;F8W9K7;E9PKH6;H0YDT4	NDUFS8	NADH dehydrogenase [ubiquinone] iron-sulfur protein 8, mitochondrial	>tr|E9PPW7|E9PPW7_HUMAN NADH dehydrogenase [ubiquinone] iron-sulfur protein 8, mitochondrial (Fragment) OS=Homo sapiens GN=NDUFS8 PE=1 SV=1;>sp|O00217|NDUS8_HUMAN NADH dehydrogenase [ubiquinone] iron-sulfur protein 8, mitochondrial OS=Homo sapiens GN=NDUFS	20.656	5.6585e-42	6		1.95925	0.29209	0.00282892	2.54838	14.7	2	2	1.7416	12.869	2	2272600	896430	1376100	21.2	3	3	1.6381	37.379	3	3046400	1089800	1956500	21.2	3	3	2.11033	93.652	4	5574600	3366500	2208100	25	4	4	2.4475	60.058	7	4992500	3242400	1750100
	835	Q8NE86-3;Q8NE86-2;Q8NE86;S4R468	MCU	Calcium uniporter protein, mitochondrial	>sp|Q8NE86-3|MCU_HUMAN Isoform 3 of Calcium uniporter protein, mitochondrial OS=Homo sapiens GN=MCU;>sp|Q8NE86-2|MCU_HUMAN Isoform 2 of Calcium uniporter protein, mitochondrial OS=Homo sapiens GN=MCU;>sp|Q8NE86|MCU_HUMAN Calcium uniporter protein, mitochon	35.158	1.9667e-12	4		1.93512	0.286708	0.0206595	1.68488	3	1	1	1.7535	NaN	1	306860	120850	186010	8.9	2	2	1.1791	49.815	2	286330	107820	178510	12.3	3	3	2.52768	30.302	3	614010	428450	185550	8.3	2	2	2.6832	33.966	2	694960	489480	205480
	380	P00403	MT-CO2	Cytochrome c oxidase subunit 2	>sp|P00403|COX2_HUMAN Cytochrome c oxidase subunit 2 OS=Homo sapiens GN=MT-CO2 PE=1 SV=1	25.565	2.234e-71	1		1.92621	0.284704	0.00361335	2.44209	27.8	5	5	1.5792	125.91	5	22893000	9094900	13798000	23.3	4	4	1.651	110.26	5	23063000	8494800	14569000	27.8	5	5	2.30846	81.166	7	20034000	13731000	6303500	32.2	6	6	2.28723	90.887	10	28624000	19422000	9201800
	726	Q16718;H7BYD0;Q16718-2;F8WAS3;C9IZN5	NDUFA5	NADH dehydrogenase [ubiquinone] 1 alpha subcomplex subunit 5	>sp|Q16718|NDUA5_HUMAN NADH dehydrogenase [ubiquinone] 1 alpha subcomplex subunit 5 OS=Homo sapiens GN=NDUFA5 PE=1 SV=3;>tr|H7BYD0|H7BYD0_HUMAN NADH dehydrogenase [ubiquinone] 1 alpha subcomplex subunit 5 (Fragment) OS=Homo sapiens GN=NDUFA5 PE=1 SV=1;>sp|	13.459	6.806e-94	5		1.91821	0.282896	0.000752766	3.12334	39.7	4	4	1.8008	35.177	4	3216100	1247800	1968300	66.4	6	6	1.7688	60.413	6	7381800	2382700	4999000	53.4	5	5	1.87494	78.75	6	3777300	2272300	1504900	43.1	4	4	2.26701	193.02	6	20146000	15443000	4702800
	33	Q9P0J0;B4DF76;J3KN00;B4DEZ3;K7EJE1;E7ENQ6;U3KQP3;K7EP87	NDUFA13;YJEFN3	NADH dehydrogenase [ubiquinone] 1 alpha subcomplex subunit 13	>sp|Q9P0J0|NDUAD_HUMAN NADH dehydrogenase [ubiquinone] 1 alpha subcomplex subunit 13 OS=Homo sapiens GN=NDUFA13 PE=1 SV=3;>tr|B4DF76|B4DF76_HUMAN NADH dehydrogenase [ubiquinone] 1 alpha subcomplex subunit 13 OS=Homo sapiens GN=NDUFA13 PE=1 SV=1;>tr|J3KN00|	16.698	1.8132e-45	8		1.91602	0.282401	0.00303802	2.51741	16.7	3	3	1.6046	71.832	5	7312300	2707300	4605000	52.1	7	7	1.6431	85.604	9	23473000	8844600	14628000	30.6	4	4	2.3596	42.487	5	4014000	2826300	1187700	52.1	7	7	2.16638	97.977	9	19922000	13411000	6510900
	735	Q4G176;F5H362;F5H755;F5H5A1;H0YGC7;F5GX20;F5H2G6;F5H3B2	ACSF3	Acyl-CoA synthetase family member 3, mitochondrial	>sp|Q4G176|ACSF3_HUMAN Acyl-CoA synthetase family member 3, mitochondrial OS=Homo sapiens GN=ACSF3 PE=1 SV=3;>tr|F5H362|F5H362_HUMAN Acyl-CoA synthetase family member 3, mitochondrial (Fragment) OS=Homo sapiens GN=ACSF3 PE=1 SV=1;>tr|F5H755|F5H755_HUMAN Ac	64.129	4.8101e-15	8		1.91084	0.281223	0.00268541	2.57099	1.2	1	1	1.528	NaN	1	128940	50329	78608	3.5	2	2	1.8023	NaN	1	239770	66485	173290	7.8	4	4	2.1523	6.5075	4	665870	474910	190960	4.3	2	2	2.24926	15.311	2	958330	643710	314620
	339	O75306;O75306-2;B7Z9L2	NDUFS2	NADH dehydrogenase [ubiquinone] iron-sulfur protein 2, mitochondrial	>sp|O75306|NDUS2_HUMAN NADH dehydrogenase [ubiquinone] iron-sulfur protein 2, mitochondrial OS=Homo sapiens GN=NDUFS2 PE=1 SV=2;>sp|O75306-2|NDUS2_HUMAN Isoform 2 of NADH dehydrogenase [ubiquinone] iron-sulfur protein 2, mitochondrial OS=Homo sapiens GN=ND	52.545	2.5002e-116	3		1.90694	0.280337	0.00636825	2.19598	16.8	6	6	1.5172	69.378	7	14602000	5573600	9028400	22.7	8	8	1.5889	74.133	10	28618000	11049000	17569000	31.7	10	10	2.41336	77.007	10	16953000	11866000	5087200	22.7	9	9	2.27293	158.74	10	68167000	20419000	47748000
	505	P30049	ATP5D	ATP synthase subunit delta, mitochondrial	>sp|P30049|ATPD_HUMAN ATP synthase subunit delta, mitochondrial OS=Homo sapiens GN=ATP5D PE=1 SV=2	17.49	1.8463e-25	1		1.89216	0.276959	0.0259848	1.58528	0	0	0			0	0	0	0	13.7	2	2	1.3971	123.45	2	3343400	1326800	2016600	5.4	1	1	2.05436	NaN	1	1070900	716490	354390	13.7	2	2	2.36033	70.842	3	6270600	4512500	1758100
	220	G3V5X4;Q8WXH0;Q8WXH0-2;Q8WXH0-6;Q8WXH0-5;Q86YP9;Q8WXH0-4;Q8WXH0-3;O60673-2;O60673;Q8WXH0-7	SYNE2	Nesprin-2	>tr|G3V5X4|G3V5X4_HUMAN Nesprin-2 OS=Homo sapiens GN=SYNE2 PE=1 SV=1;>sp|Q8WXH0|SYNE2_HUMAN Nesprin-2 OS=Homo sapiens GN=SYNE2 PE=1 SV=3;>sp|Q8WXH0-2|SYNE2_HUMAN Isoform 2 of Nesprin-2 OS=Homo sapiens GN=SYNE2	787.71	1.7777e-05	11		1.89153	0.276813	0.00520523	2.28356	0.2	1	1	2.1401	67.281	2	10064000	3232600	6831400	0.2	1	1	1.8113	46.202	2	6791600	2463800	4327700	0.2	1	1	2.32905	NaN	1	9017500	6334300	2683200	0.5	3	3	1.41792	128.08	4	12843000	8316300	4526800
	656	Q02218;E9PCR7;F5H801;Q02218-2;E9PDF2;E9PFG7;Q02218-3;C9J4G7;Q9ULD0;Q9ULD0-3;Q9ULD0-2	OGDH	2-oxoglutarate dehydrogenase, mitochondrial	>sp|Q02218|ODO1_HUMAN 2-oxoglutarate dehydrogenase, mitochondrial OS=Homo sapiens GN=OGDH PE=1 SV=3;>tr|E9PCR7|E9PCR7_HUMAN 2-oxoglutarate dehydrogenase, mitochondrial OS=Homo sapiens GN=OGDH PE=1 SV=1;>tr|F5H801|F5H801_HUMAN 2-oxoglutarate dehydrogenase,	115.93	2.1294e-268	11		1.88812	0.276029	0.00280511	2.55205	33.3	33	33	1.621	34.298	53	37621000	14280000	23341000	35.7	30	30	1.6163	21.895	44	26805000	9827100	16978000	33.9	32	32	2.30654	25.818	53	28852000	20182000	8669900	31.5	30	30	2.10305	28.562	45	48360000	32567000	15793000
	437	P10606	COX5B	Cytochrome c oxidase subunit 5B, mitochondrial	>sp|P10606|COX5B_HUMAN Cytochrome c oxidase subunit 5B, mitochondrial OS=Homo sapiens GN=COX5B PE=1 SV=2	13.696	1.3529e-10	1		1.88789	0.275976	0.00100304	2.99868	8.5	1	1	1.9017	NaN	1	1497200	425150	1072000	9.3	1	1	1.5715	NaN	1	887250	360180	527080	19.4	3	3	2.03062	64.471	2	2659500	1773100	886340	19.4	3	3	2.09323	34.124	3	5901400	3895100	2006200
	572	P51970;F5H7V7	NDUFA8	NADH dehydrogenase [ubiquinone] 1 alpha subcomplex subunit 8	>sp|P51970|NDUA8_HUMAN NADH dehydrogenase [ubiquinone] 1 alpha subcomplex subunit 8 OS=Homo sapiens GN=NDUFA8 PE=1 SV=3;>tr|F5H7V7|F5H7V7_HUMAN NADH dehydrogenase [ubiquinone] 1 alpha subcomplex subunit 8 OS=Homo sapiens GN=NDUFA8 PE=1 SV=1	20.105	4.3541e-65	2		1.87192	0.272288	0.00539908	2.26768	57.6	7	7	1.4752	65.088	8	8789700	3494800	5294900	48.8	7	7	1.6477	107.07	9	13879000	5329800	8549700	48.8	7	7	2.3822	80.648	9	7991800	5477300	2514500	32.6	5	5	2.12053	59.732	8	5936700	4019800	1916900
	322	O43676;C9JKQ2	NDUFB3	NADH dehydrogenase [ubiquinone] 1 beta subcomplex subunit 3	>sp|O43676|NDUB3_HUMAN NADH dehydrogenase [ubiquinone] 1 beta subcomplex subunit 3 OS=Homo sapiens GN=NDUFB3 PE=1 SV=3;>tr|C9JKQ2|C9JKQ2_HUMAN NADH dehydrogenase [ubiquinone] 1 beta subcomplex subunit 3 (Fragment) OS=Homo sapiens GN=NDUFB3 PE=1 SV=1	11.402	1.8822e-16	2		1.86481	0.270635	0.000696081	3.15734	11.2	1	1	1.7264	NaN	1	1864600	720490	1144100	22.4	3	3	1.7458	7.3397	3	9103400	3186900	5916500	22.4	3	3	2.1653	55.444	3	2741900	1840300	901580	21.4	2	2	1.85305	18.813	3	5927300	3845100	2082200
	75	C9IZC9;H7BZ75;O75600;O75600-2	GCAT	2-amino-3-ketobutyrate coenzyme A ligase, mitochondrial	>tr|C9IZC9|C9IZC9_HUMAN 2-amino-3-ketobutyrate coenzyme A ligase, mitochondrial (Fragment) OS=Homo sapiens GN=GCAT PE=4 SV=1;>tr|H7BZ75|H7BZ75_HUMAN 2-amino-3-ketobutyrate coenzyme A ligase, mitochondrial (Fragment) OS=Homo sapiens GN=GCAT PE=1 SV=1;>sp|O7	19.177	0.0016804	4		1.8186	0.259736	0.0485903	1.31345	0	0	0			0	0	0	0	5.6	1	1	2.0153	NaN	1	171500	49874	121630	5.6	1	1	1.64109	NaN	1	160360	97901	62457	0	0	0			0	0	0	0
	267	Q9P0P8;J3KQ88	C6orf203	Uncharacterized protein C6orf203	>sp|Q9P0P8|CF203_HUMAN Uncharacterized protein C6orf203 OS=Homo sapiens GN=C6orf203 PE=1 SV=1;>tr|J3KQ88|J3KQ88_HUMAN Uncharacterized protein C6orf203 OS=Homo sapiens GN=C6orf203 PE=1 SV=1	27.941	1.1617e-23	2		1.80507	0.256493	0.0376262	1.42451	15.8	4	4	1.1607	33.179	4	4870500	2066700	2803900	10.8	3	3	1.5262	21.233	3	3551800	1551200	2000600	15.8	4	4	3.20862	116.04	4	3691300	2515200	1176100	10.8	3	3	1.86776	63.954	6	6486400	4307400	2179000
	382	P00505;P00505-2	GOT2	Aspartate aminotransferase, mitochondrial	>sp|P00505|AATM_HUMAN Aspartate aminotransferase, mitochondrial OS=Homo sapiens GN=GOT2 PE=1 SV=3;>sp|P00505-2|AATM_HUMAN Isoform 2 of Aspartate aminotransferase, mitochondrial OS=Homo sapiens GN=GOT2	47.517	1.236e-14	2		1.7869	0.2521	0.0285535	1.54434	0	0	0			0	0	0	0	13	4	4	1.3536	47.628	4	4288800	1686000	2602800	6.7	2	2	2.20366	97.96	2	1485100	1037400	447760	8.8	2	2	1.91278	0.68222	2	1582600	957560	625080
	476	P20674;H3BRM5;H3BV69;H3BNX8	COX5A	Cytochrome c oxidase subunit 5A, mitochondrial	>sp|P20674|COX5A_HUMAN Cytochrome c oxidase subunit 5A, mitochondrial OS=Homo sapiens GN=COX5A PE=1 SV=2;>tr|H3BRM5|H3BRM5_HUMAN Cytochrome c oxidase subunit 5A, mitochondrial OS=Homo sapiens GN=COX5A PE=1 SV=1;>tr|H3BV69|H3BV69_HUMAN Cytochrome c oxidase	16.762	2.5338e-22	4		1.78365	0.251309	0.00456342	2.34071	22	3	3	1.4158	64.215	3	4600100	1977700	2622400	22	4	4	1.6505	103.55	4	16229000	9373200	6855900	12	3	3	2.19887	43.623	3	6912900	4675700	2237300	22	4	4	1.96978	74.971	5	8978700	5904800	3073800
	671	Q08J23-3;Q08J23-2;Q08J23	NSUN2	tRNA (cytosine(34)-C(5))-methyltransferase	>sp|Q08J23-3|NSUN2_HUMAN Isoform 3 of tRNA (cytosine(34)-C(5))-methyltransferase OS=Homo sapiens GN=NSUN2;>sp|Q08J23-2|NSUN2_HUMAN Isoform 2 of tRNA (cytosine(34)-C(5))-methyltransferase OS=Homo sapiens GN=NSUN2;>sp|Q08J23|NSUN2_HUMAN tRNA (cytosine(34)-C(	59.383	2.3042e-05	3		1.77735	0.249772	0.0055077	2.25903	2.1	1	1	1.632	NaN	1	196800	35778	161020	0	0	0			0	0	0	0	2.1	1	1	1.98543	NaN	1	167180	110630	56545	2.1	1	1	1.73277	NaN	1	110400	68784	41612
	454	P13073;H3BN72;H3BNV9;H3BPG0;Q86WV2;H3BNI5	COX4I1	Cytochrome c oxidase subunit 4 isoform 1, mitochondrial	>sp|P13073|COX41_HUMAN Cytochrome c oxidase subunit 4 isoform 1, mitochondrial OS=Homo sapiens GN=COX4I1 PE=1 SV=1;>tr|H3BN72|H3BN72_HUMAN Cytochrome c oxidase subunit 4 isoform 1, mitochondrial OS=Homo sapiens GN=COX4I1 PE=1 SV=1;>tr|H3BNV9|H3BNV9_HUMAN C	19.576	5.5925e-37	6		1.7752	0.249248	0.00395039	2.40336	14.2	2	2	1.4685	17.106	3	7294200	2635800	4658400	39.6	8	8	1.5759	58.916	10	27050000	10396000	16654000	20.1	4	4	2.2096	64.571	5	7295300	4986700	2308500	43.2	8	8	1.94212	53.487	9	27098000	17925000	9173400
	467	P17568	NDUFB7	NADH dehydrogenase [ubiquinone] 1 beta subcomplex subunit 7	>sp|P17568|NDUB7_HUMAN NADH dehydrogenase [ubiquinone] 1 beta subcomplex subunit 7 OS=Homo sapiens GN=NDUFB7 PE=1 SV=4	16.402	4.7821e-12	1		1.76597	0.246984	0.000727696	3.13805	32.8	4	4	1.5431	130.02	5	5832800	2175100	3657800	20.4	3	3	1.7575	42.813	3	5616700	1773800	3842900	13.1	2	2	1.93768	16.066	3	1903200	1244000	659170	20.4	3	3	1.85082	46.764	6	5783900	3684400	2099500
	893	Q96SZ6-5;Q96SZ6-6;Q96SZ6-3;Q96SZ6;Q96SZ6-2;Q96SZ6-4	CDK5RAP1	CDK5 regulatory subunit-associated protein 1	>sp|Q96SZ6-5|CK5P1_HUMAN Isoform 5 of CDK5 regulatory subunit-associated protein 1 OS=Homo sapiens GN=CDK5RAP1;>sp|Q96SZ6-6|CK5P1_HUMAN Isoform 6 of CDK5 regulatory subunit-associated protein 1 OS=Homo sapiens GN=CDK5RAP1;>sp|Q96SZ6-3|CK5P1_HUMAN Isoform 3	48.072	3.8052e-11	6		1.76072	0.245691	0.00955741	2.01966	3.1	1	1	1.3415	NaN	1	184710	63784	120930	5.9	2	2	1.7511	8.0792	2	451080	167050	284020	5.9	2	2	2.43315	2.7975	2	224500	171380	53115	7	2	2	1.68149	43.481	2	477600	315620	161980
	39	B4DL14;P36542-2;P36542	ATP5C1	ATP synthase subunit gamma;ATP synthase subunit gamma, mitochondrial	>tr|B4DL14|B4DL14_HUMAN ATP synthase subunit gamma OS=Homo sapiens GN=ATP5C1 PE=1 SV=1;>sp|P36542-2|ATPG_HUMAN Isoform Heart of ATP synthase subunit gamma, mitochondrial OS=Homo sapiens GN=ATP5C1;>sp|P36542|ATPG_HUMAN ATP synthase subunit gamma, mitochondr	27.512	1.126e-24	3		1.75687	0.244739	0.00305155	2.51548	17.2	4	4	1.6219	58.34	5	8262500	3057800	5204600	22	5	5	1.5874	57.419	9	10921000	3923500	6997900	17.2	4	4	2.21356	82.542	6	4441000	2824500	1616500	27.6	6	6	1.67168	106.96	9	25095000	15131000	9963700
	230	H0YL12;P13804-2;H0YLU7;P13804;H0YNX6;H0YKF0;H0YK49	ETFA	Electron transfer flavoprotein subunit alpha, mitochondrial	>tr|H0YL12|H0YL12_HUMAN Electron transfer flavoprotein subunit alpha, mitochondrial (Fragment) OS=Homo sapiens GN=ETFA PE=1 SV=2;>sp|P13804-2|ETFA_HUMAN Isoform 2 of Electron transfer flavoprotein subunit alpha, mitochondrial OS=Homo sapiens GN=ETFA;>tr|H0	24.797	6.2228e-13	7		1.7526	0.243682	0.00253717	2.59565	4.2	1	1	1.808	NaN	1	206810	76222	130590	9.6	2	2	1.4348	115.34	2	1133100	477350	655730	4.2	1	1	2.07499	NaN	1	203920	136640	67284	24.3	4	4	1.75276	27.193	4	1995900	1347600	648310
	378	P00367;B4DGN5;B3KV55;P49448	GLUD1;GLUD2	Glutamate dehydrogenase 1, mitochondrial;Glutamate dehydrogenase;Glutamate dehydrogenase 2, mitochondrial	>sp|P00367|DHE3_HUMAN Glutamate dehydrogenase 1, mitochondrial OS=Homo sapiens GN=GLUD1 PE=1 SV=2;>tr|B4DGN5|B4DGN5_HUMAN Glutamate dehydrogenase OS=Homo sapiens GN=GLUD1 PE=1 SV=1;>tr|B3KV55|B3KV55_HUMAN Glutamate dehydrogenase OS=Homo sapiens GN=GLUD1 PE	61.397	6.6142e-69	4		1.74553	0.241928	0.00470446	2.32749	25.1	12	12	1.5168	25.958	11	8815300	3400300	5415000	22.4	10	10	1.485	17.001	13	9365700	3762300	5603400	28.7	12	12	2.1994	25.014	12	7958900	5439800	2519000	22.9	10	10	1.87392	22.848	12	12168000	8103000	4065500
	639	P82909	MRPS36	28S ribosomal protein S36, mitochondrial	>sp|P82909|RT36_HUMAN 28S ribosomal protein S36, mitochondrial OS=Homo sapiens GN=MRPS36 PE=1 SV=2	11.466	9.416e-33	1		1.71832	0.235104	0.00190564	2.71996	15.5	1	1	1.8827	NaN	1	1054000	399810	654180	33	2	2	1.4649	28.926	3	3541600	1433900	2107600	33	2	2	1.60305	189.47	3	5339700	1129300	4210400	17.5	1	1	1.97188	NaN	1	589180	389420	199760
	507	P30084	ECHS1	Enoyl-CoA hydratase, mitochondrial	>sp|P30084|ECHM_HUMAN Enoyl-CoA hydratase, mitochondrial OS=Homo sapiens GN=ECHS1 PE=1 SV=4	31.387	5.9716e-161	1		1.71479	0.234211	0.00279718	2.55328	33.1	7	7	1.6152	84.061	7	3998700	1550900	2447800	21	4	4	1.5036	3.856	4	2173800	767630	1406100	23.8	4	4	2.12418	69.767	4	1257500	795570	461940	23.8	4	4	1.67608	59.059	4	2209300	1392200	817090
	677	Q12931-2;Q12931;I3L0K7;I3L239;I3L2D5;I3L253	TRAP1	Heat shock protein 75 kDa, mitochondrial	>sp|Q12931-2|TRAP1_HUMAN Isoform 2 of Heat shock protein 75 kDa, mitochondrial OS=Homo sapiens GN=TRAP1;>sp|Q12931|TRAP1_HUMAN Heat shock protein 75 kDa, mitochondrial OS=Homo sapiens GN=TRAP1 PE=1 SV=3;>tr|I3L0K7|I3L0K7_HUMAN Heat shock protein 75 kDa, mi	74.267	6.0053e-129	6		1.71356	0.233899	0.00481138	2.31773	17.8	10	10	1.5181	27.514	16	9061800	3718700	5343100	22.3	12	12	1.4473	29.882	17	21400000	8110900	13290000	24.3	14	14	2.11703	24.92	17	8117100	5486100	2631100	19.8	11	11	1.85357	27.535	17	16233000	10554000	5679600
	785	Q7L0Y3;C9JVB6	TRMT10C	Mitochondrial ribonuclease P protein 1	>sp|Q7L0Y3|MRRP1_HUMAN Mitochondrial ribonuclease P protein 1 OS=Homo sapiens GN=TRMT10C PE=1 SV=2;>tr|C9JVB6|C9JVB6_HUMAN Mitochondrial ribonuclease P protein 1 (Fragment) OS=Homo sapiens GN=TRMT10C PE=1 SV=1	47.346	2.3452e-25	2		1.70544	0.231837	0.00742403	2.12936	7.2	3	3	1.3342	75.595	5	2405600	986130	1419400	20.1	6	6	1.5539	57.695	13	7001200	2694000	4307200	18.9	5	5	1.87931	77.072	6	1993700	1270700	723020	8.7	3	3	2.17122	105	6	3804400	2375800	1428600
	300	O00411;K7EMH3;K7ESD1	POLRMT	DNA-directed RNA polymerase, mitochondrial	>sp|O00411|RPOM_HUMAN DNA-directed RNA polymerase, mitochondrial OS=Homo sapiens GN=POLRMT PE=1 SV=2	138.62	3.0905e-267	3		1.64871	0.217144	0.00251976	2.59864	32.6	31	31	1.481	32.303	61	68567000	26818000	41749000	28.7	26	26	1.4715	22.999	46	35549000	13762000	21787000	33	31	31	1.93907	36.067	58	44010000	28550000	15461000	28.9	26	26	1.7485	41.83	47	63003000	40675000	22328000
	431	P09669	COX6C	Cytochrome c oxidase subunit 6C	>sp|P09669|COX6C_HUMAN Cytochrome c oxidase subunit 6C OS=Homo sapiens GN=COX6C PE=1 SV=2	8.7813	3.1348e-10	1		1.64177	0.215313	0.00211792	2.67409	20	2	2	1.5255	127.68	3	5921800	1997100	3924700	21.3	2	2	1.4892	83.262	3	6569700	2690700	3879000	34.7	3	3	1.93162	92.282	3	3583900	2355300	1228600	21.3	2	2	1.65563	75.372	4	8056100	5071300	2984800
	134	P14406;D6RIE3;D6RGV5;H0UI06;D6R9C3	COX7A2	Cytochrome c oxidase subunit 7A2, mitochondrial	>sp|P14406|CX7A2_HUMAN Cytochrome c oxidase subunit 7A2, mitochondrial OS=Homo sapiens GN=COX7A2 PE=1 SV=1;>tr|D6RIE3|D6RIE3_HUMAN Uncharacterized protein OS=Homo sapiens GN=COX7A2 PE=1 SV=1;>tr|D6RGV5|D6RGV5_HUMAN Cytochrome c oxidase subunit 7A2, mitocho	9.3959	5.2436e-24	5		1.63813	0.214349	0.00223347	2.65102	0	0	0			0	0	0	0	27.7	2	2	1.5365	115.1	2	2409100	911960	1497200	15.7	1	1	1.72983	NaN	1	494920	324040	170880	27.7	2	2	1.6539	NaN	1	2622100	1560300	1061800
	209	F8W6E4;P43304-2;P43304;F5GYK7	GPD2	Glycerol-3-phosphate dehydrogenase, mitochondrial	>tr|F8W6E4|F8W6E4_HUMAN Glycerol-3-phosphate dehydrogenase, mitochondrial OS=Homo sapiens GN=GPD2 PE=1 SV=1;>sp|P43304-2|GPDM_HUMAN Isoform 2 of Glycerol-3-phosphate dehydrogenase, mitochondrial OS=Homo sapiens GN=GPD2;>sp|P43304|GPDM_HUMAN Glycerol-3-phos	55.758	6.3616e-07	4		1.62966	0.212096	0.0143384	1.8435	1.8	1	1	1.4312	NaN	1	162400	66543	95856	1.8	1	1	1.2874	NaN	1	521880	221580	300300	4.2	2	2	1.69025	48.859	5	616440	365640	250800	1.6	1	1	2.26475	NaN	1	294660	207700	86965
	889	Q96QE5;J3KTG7	TEFM	Transcription elongation factor, mitochondrial	>sp|Q96QE5|TEFM_HUMAN Transcription elongation factor, mitochondrial OS=Homo sapiens GN=TEFM PE=1 SV=1	41.676	1.1871e-08	2		1.6073	0.206096	0.0190959	1.71906	6.1	2	2	1.1729	6.1815	2	571190	252310	318880	3.6	1	1	1.5086	NaN	1	348400	149490	198910	3.6	1	1	2.25078	NaN	1	220450	156380	64079	8.3	3	3	1.67577	61.48	3	945860	632070	313790
	734	Q3ZCQ8;Q3ZCQ8-2;Q3ZCQ8-3;M0R2F8;M0R0C3;M0R003;M0R1Y4;M0QXC3;M0R2Z3;M0R303;M0R2D2;M0R2Q2;M0R047	TIMM50	Mitochondrial import inner membrane translocase subunit TIM50	>sp|Q3ZCQ8|TIM50_HUMAN Mitochondrial import inner membrane translocase subunit TIM50 OS=Homo sapiens GN=TIMM50 PE=1 SV=2;>sp|Q3ZCQ8-2|TIM50_HUMAN Isoform 2 of Mitochondrial import inner membrane translocase subunit TIM50 OS=Homo sapiens GN=TIMM50;>sp|Q3ZCQ	39.646	3.0184e-132	13		1.60673	0.205943	0.0108748	1.96358	28.9	8	8	1.4648	60.503	9	10789000	3699300	7089500	26.6	7	7	1.2545	100.2	10	15645000	6615300	9029500	30.6	9	9	2.07009	77.961	14	7724900	4987300	2737600	26.6	7	7	1.75199	71.309	12	14291000	10253000	4038100
	364	O95168;O95168-2;C9JXQ9;F2Z3P9	NDUFB4	NADH dehydrogenase [ubiquinone] 1 beta subcomplex subunit 4	>sp|O95168|NDUB4_HUMAN NADH dehydrogenase [ubiquinone] 1 beta subcomplex subunit 4 OS=Homo sapiens GN=NDUFB4 PE=1 SV=3;>sp|O95168-2|NDUB4_HUMAN Isoform 2 of NADH dehydrogenase [ubiquinone] 1 beta subcomplex subunit 4 OS=Homo sapiens GN=NDUFB4;>tr|C9JXQ9|C9	15.208	4.4041e-34	4		1.58937	0.201225	0.00608765	2.21555	10.1	1	1	1.5504	NaN	1	924640	394890	529750	48.1	6	6	1.2601	77.98	7	9827800	4422900	5404800	26.4	3	3	1.79083	44.68	3	1847200	1152900	694270	34.1	4	4	1.82389	87.406	5	7356300	4512500	2843800
	501	P28331-4;P28331;P28331-2;P28331-5;B4DJ81;P28331-3;C9JPQ5	NDUFS1	NADH-ubiquinone oxidoreductase 75 kDa subunit, mitochondrial	>sp|P28331-4|NDUS1_HUMAN Isoform 4 of NADH-ubiquinone oxidoreductase 75 kDa subunit, mitochondrial OS=Homo sapiens GN=NDUFS1;>sp|P28331|NDUS1_HUMAN NADH-ubiquinone oxidoreductase 75 kDa subunit, mitochondrial OS=Homo sapiens GN=NDUFS1 PE=1 SV=3;>sp|P28331-	73.527	0	7		1.58301	0.199483	0.0076692	2.11525	44.3	21	21	1.3632	24.738	32	22244000	9387700	12856000	56.3	28	28	1.36	25.475	38	83494000	34782000	48712000	48.2	24	24	1.89294	35.388	36	26734000	17060000	9673400	46.1	21	21	1.78936	30.628	35	59054000	36225000	22829000
	369	O95298;E9PM14;E9PQ53;O95298-3;O95298-2	NDUFC2;NDUFC2-KCTD14	NADH dehydrogenase [ubiquinone] 1 subunit C2	>sp|O95298|NDUC2_HUMAN NADH dehydrogenase [ubiquinone] 1 subunit C2 OS=Homo sapiens GN=NDUFC2 PE=1 SV=1;>tr|E9PM14|E9PM14_HUMAN NADH dehydrogenase [ubiquinone] 1 subunit C2 OS=Homo sapiens GN=NDUFC2 PE=1 SV=1;>sp|E9PQ53|NDUCR_HUMAN NADH dehydrogenase [ubiq	14.187	1.9965e-11	5		1.56948	0.195756	0.00475259	2.32307	18.5	2	2	1.347	NaN	1	1488500	438140	1050400	26.1	4	4	1.4526	80.008	4	6502600	2398600	4104000	16.8	2	2	1.90157	79.626	2	1287000	841670	445360	17.6	3	3	1.63079	73.887	3	4832400	3032000	1800500
	963	Q9NP73;Q9NP73-4;Q9NP73-3;D6RD27;X6RD70;Q9NP73-2;D6RE84	ALG13	UDP-N-acetylglucosamine transferase subunit ALG13 homolog	>sp|Q9NP73|ALG13_HUMAN Putative bifunctional UDP-N-acetylglucosamine transferase and deubiquitinase ALG13 OS=Homo sapiens GN=ALG13 PE=1 SV=2;>sp|Q9NP73-4|ALG13_HUMAN Isoform 4 of Putative bifunctional UDP-N-acetylglucosamine transferase and deubiquitinase	126.05	2.2254e-200	7		1.56465	0.194416	0.000660906	3.17986	17.9	17	17	1.4803	47.496	20	72031000	12681000	59350000	20.4	17	17	1.4715	66.756	19	48814000	8828000	39986000	15.5	16	16	1.57619	59.691	21	12548000	6691500	5856800	8.7	9	9	1.7456	38.866	11	11175000	6416700	4757900
	154	O95299;E7ESZ7;Q8WXC9;H7C2W5;H7C1Y7;H7C2X4;Q8N1B9;C9J6X0	NDUFA10	NADH dehydrogenase [ubiquinone] 1 alpha subcomplex subunit 10, mitochondrial	>sp|O95299|NDUAA_HUMAN NADH dehydrogenase [ubiquinone] 1 alpha subcomplex subunit 10, mitochondrial OS=Homo sapiens GN=NDUFA10 PE=1 SV=1;>tr|E7ESZ7|E7ESZ7_HUMAN NADH dehydrogenase [ubiquinone] 1 alpha subcomplex subunit 10, mitochondrial OS=Homo sapiens GN	40.75	2.4623e-107	8		1.5599	0.193097	0.00414133	2.38286	28.7	8	8	1.4822	71.524	10	9226200	3607700	5618500	31.8	9	9	1.3041	57.629	10	150690000	22541000	128140000	25.6	10	10	1.821	71.642	11	7782000	4913100	2868900	33	12	12	1.68214	68.454	16	72462000	59102000	13360000
	303	O00483	NDUFA4	NADH dehydrogenase [ubiquinone] 1 alpha subcomplex subunit 4	>sp|O00483|NDUA4_HUMAN NADH dehydrogenase [ubiquinone] 1 alpha subcomplex subunit 4 OS=Homo sapiens GN=NDUFA4 PE=1 SV=1	9.3697	6.9167e-11	1		1.55115	0.190655	0.00044579	3.35087	27.2	2	2	1.4065	117.63	2	3990700	1564400	2426300	27.2	2	2	1.5411	93.253	3	12101000	4704600	7396800	27.2	2	2	1.63867	27.756	3	3826400	2316200	1510200	27.2	2	2	1.62989	34.363	4	12303000	7664300	4638400
	480	Q5T2J3;P21953	BCKDHB	2-oxoisovalerate dehydrogenase subunit beta, mitochondrial	>tr|Q5T2J3|Q5T2J3_HUMAN 2-oxoisovalerate dehydrogenase subunit beta, mitochondrial OS=Homo sapiens GN=BCKDHB PE=1 SV=1;>sp|P21953|ODBB_HUMAN 2-oxoisovalerate dehydrogenase subunit beta, mitochondrial OS=Homo sapiens GN=BCKDHB PE=1 SV=2	23.55	2.9062e-11	2		1.54478	0.188866	0.0306373	1.51375	0	0	0			0	0	0	0	14.2	2	2	1.2557	1.9154	2	932460	363820	568640	14.2	2	2	1.86088	36.989	2	388130	254140	133990	14.2	2	2	1.57759	NaN	1	611230	386820	224420
	329	O43920	NDUFS5	NADH dehydrogenase [ubiquinone] iron-sulfur protein 5	>sp|O43920|NDUS5_HUMAN NADH dehydrogenase [ubiquinone] iron-sulfur protein 5 OS=Homo sapiens GN=NDUFS5 PE=1 SV=3	12.517	1.7367e-41	1		1.53786	0.186916	0.0112479	1.94893	0	0	0			0	0	0	0	41.5	4	4	1.3346	4.7023	3	4208000	1816300	2391800	38.7	4	4	1.6785	26.56	4	1998700	1264600	734160	44.3	4	4	1.62359	61.881	4	4954100	3266100	1688100
	894	Q96TA2-3;Q96TA2-2;Q96TA2;R4GNA5;Q5T8D1;Q5T8D2	YME1L1	ATP-dependent zinc metalloprotease YME1L1	>sp|Q96TA2-3|YMEL1_HUMAN Isoform 3 of ATP-dependent zinc metalloprotease YME1L1 OS=Homo sapiens GN=YME1L1;>sp|Q96TA2-2|YMEL1_HUMAN Isoform 2 of ATP-dependent zinc metalloprotease YME1L1 OS=Homo sapiens GN=YME1L1;>sp|Q96TA2|YMEL1_HUMAN ATP-dependent zinc me	75.981	4.2892e-277	6		1.53701	0.186676	0.00395713	2.40262	24.3	13	13	1.4089	15.414	13	9064200	3625800	5438400	22.3	13	13	1.3519	76.05	16	16701000	7062300	9638600	22.5	12	12	1.80404	25.767	12	5145000	3331800	1813300	25.2	13	13	1.62417	32.765	11	12531000	7833900	4697200
	233	H0YLA2;P37108	SRP14	Signal recognition particle 14 kDa protein	>tr|H0YLA2|H0YLA2_HUMAN Signal recognition particle 14 kDa protein OS=Homo sapiens GN=SRP14 PE=1 SV=1;>sp|P37108|SRP14_HUMAN Signal recognition particle 14 kDa protein OS=Homo sapiens GN=SRP14 PE=1 SV=2	13.058	2.3931e-55	2		1.53529	0.186191	0.00226339	2.64524	20.9	2	2	1.4414	137.25	2	1229600	513110	716490	12.2	1	1	1.3453	NaN	1	946130	392430	553700	23.5	2	2	1.67017	70.085	2	580310	365740	214570	23.5	2	2	1.71553	45.999	3	1350100	794510	555610
	666	Q08257-3;Q08257;Q08257-2;C9JH92;A6NP24	CRYZ	Quinone oxidoreductase	>sp|Q08257-3|QOR_HUMAN Isoform 3 of Quinone oxidoreductase OS=Homo sapiens GN=CRYZ;>sp|Q08257|QOR_HUMAN Quinone oxidoreductase OS=Homo sapiens GN=CRYZ PE=1 SV=1;>sp|Q08257-2|QOR_HUMAN Isoform 2 of Quinone oxidoreductase OS=Homo sapiens GN=CRYZ;>tr|C9JH92|C	31.528	3.0114e-08	5		1.53361	0.185714	0.00295148	2.52996	4.1	1	1	1.7023	NaN	1	196240	65430	130810	5.8	1	1	1.289	NaN	1	295410	137520	157890	9.5	2	2	1.56255	128.69	2	872260	566860	305390	9.5	2	2	1.61337	138.68	2	1176900	752030	424900
	491	P24539;Q5QNZ2	ATP5F1	ATP synthase subunit b, mitochondrial	>sp|P24539|AT5F1_HUMAN ATP synthase F(0) complex subunit B1, mitochondrial OS=Homo sapiens GN=ATP5F1 PE=1 SV=2;>tr|Q5QNZ2|Q5QNZ2_HUMAN ATP synthase F(0) complex subunit B1, mitochondrial OS=Homo sapiens GN=ATP5F1 PE=1 SV=1	28.908	3.4853e-80	2		1.52819	0.184178	0.00757147	2.12082	13.7	2	2	1.2586	31.447	2	3286700	1423900	1862900	21.9	4	4	1.4654	100.74	4	14299000	5840000	8459400	23	4	4	1.56759	117.39	4	13930000	7916400	6013600	16.8	3	3	1.8864	122.11	3	5018400	3256500	1761900
	416	P06576;F8VPV9;H0YH81;F8W079;F8W0P7;H0YI37;F8VQY0	ATP5B	ATP synthase subunit beta, mitochondrial;ATP synthase subunit beta	>sp|P06576|ATPB_HUMAN ATP synthase subunit beta, mitochondrial OS=Homo sapiens GN=ATP5B PE=1 SV=3;>tr|F8VPV9|F8VPV9_HUMAN ATP synthase subunit beta OS=Homo sapiens GN=ATP5B PE=1 SV=1;>tr|H0YH81|H0YH81_HUMAN ATP synthase subunit beta (Fragment) OS=Homo sapi	56.559	0	7		1.52489	0.183238	0.0264692	1.57726	68.8	24	24	1.2427	106.1	47	190000000	87036000	102970000	59.2	22	22	1.1905	104.55	51	216410000	98700000	117710000	64.8	23	23	2.07293	65.628	51	128170000	87097000	41077000	69.6	26	26	1.76308	62.719	51	295590000	186710000	108880000
	323	O43678	NDUFA2	NADH dehydrogenase [ubiquinone] 1 alpha subcomplex subunit 2	>sp|O43678|NDUA2_HUMAN NADH dehydrogenase [ubiquinone] 1 alpha subcomplex subunit 2 OS=Homo sapiens GN=NDUFA2 PE=1 SV=3	10.921	5.3838e-40	1		1.52219	0.18247	0.025784	1.58865	10.1	1	1	1.5096	NaN	1	1089800	373210	716640	31.3	2	2	1.0573	143.39	2	2852500	1336900	1515700	10.1	2	2	1.88772	0.36619	2	1103800	706620	397190	31.3	3	3	1.7819	24.34	3	3660600	2325100	1335600
	669	Q08380;K7EP36;K7EJY8;K7ESM3;K7EKQ5	LGALS3BP	Galectin-3-binding protein	>sp|Q08380|LG3BP_HUMAN Galectin-3-binding protein OS=Homo sapiens GN=LGALS3BP PE=1 SV=1	65.33	5.3795e-62	5		1.52097	0.182121	0.00205249	2.68772	14.5	7	7	1.4616	49.354	21	14780000	5840800	8939400	24.3	11	11	1.3353	47.708	28	41686000	17366000	24321000	24.3	11	11	1.62056	54.901	25	16620000	10172000	6447400	16.8	8	8	1.69205	85.947	24	28256000	17159000	11097000
	469	P17931;G3V3R6	LGALS3	Galectin-3	>sp|P17931|LEG3_HUMAN Galectin-3 OS=Homo sapiens GN=LGALS3 PE=1 SV=5;>tr|G3V3R6|G3V3R6_HUMAN Galectin OS=Homo sapiens GN=LGALS3 PE=1 SV=1	26.152	7.3998e-07	2		1.51915	0.1816	0.00316148	2.50011	7.2	2	2	1.3918	15.243	2	1107800	465850	641960	10	2	2	1.3843	1.7097	2	1311300	457940	853360	7.2	2	2	1.75905	27.179	3	1122100	650720	471370	7.2	2	2	1.57151	15.581	3	1915000	1156000	758940
	529	P36957;B7Z5W8;Q86SW4;H0YJF9;G3V3F0;G3V5M3	DLST	Dihydrolipoyllysine-residue succinyltransferase component of 2-oxoglutarate dehydrogenase complex, mitochondrial	>sp|P36957|ODO2_HUMAN Dihydrolipoyllysine-residue succinyltransferase component of 2-oxoglutarate dehydrogenase complex, mitochondrial OS=Homo sapiens GN=DLST PE=1 SV=4;>tr|B7Z5W8|B7Z5W8_HUMAN Dihydrolipoyllysine-residue succinyltransferase component of 2-	48.755	6.9773e-120	6		1.5032	0.177015	0.0173444	1.76084	33.1	14	14	1.2034	61.147	33	58963000	24996000	33967000	28.5	13	13	1.2835	62.585	27	60211000	24800000	35411000	28	11	11	1.86157	33.584	29	39175000	24925000	14250000	30.2	12	12	1.77573	46.385	30	59007000	36518000	22488000
	365	O95169-3;O95169;K9J7I2;E9PQ68;O95169-2;E9PIZ8	NDUFB8	NADH dehydrogenase [ubiquinone] 1 beta subcomplex subunit 8, mitochondrial	>sp|O95169-3|NDUB8_HUMAN Isoform 3 of NADH dehydrogenase [ubiquinone] 1 beta subcomplex subunit 8, mitochondrial OS=Homo sapiens GN=NDUFB8;>sp|O95169|NDUB8_HUMAN NADH dehydrogenase [ubiquinone] 1 beta subcomplex subunit 8, mitochondrial OS=Homo sapiens GN=	18.479	1.0198e-23	6		1.50006	0.17611	0.0209884	1.67802	12.9	2	2	1.3093	20.853	2	3997800	1813600	2184200	25.2	3	3	1.1563	47.273	3	3653000	1524300	2128700	12.9	2	2	1.75254	4.2992	2	2371400	1475200	896220	7.1	1	1	1.90836	NaN	1	2263900	1411100	852870
	935	Q9H078-2;Q9H078-3;Q9H078;B4DXW4;Q9H078-4;H0YGM0;F5GX99;Q7Z777;H0YFF5;F5H7A5;F5H392;S4R372	CLPB	Caseinolytic peptidase B protein homolog	>sp|Q9H078-2|CLPB_HUMAN Isoform 2 of Caseinolytic peptidase B protein homolog OS=Homo sapiens GN=CLPB;>sp|Q9H078-3|CLPB_HUMAN Isoform 3 of Caseinolytic peptidase B protein homolog OS=Homo sapiens GN=CLPB;>sp|Q9H078|CLPB_HUMAN Caseinolytic peptidase B prote	75.448	3.5148e-62	12		1.49689	0.175189	0.0139495	1.85544	13.1	8	8	1.2742	14.532	7	3464300	1523800	1940600	12.4	7	7	1.2373	30.546	7	2925400	1214400	1711000	19.1	11	11	1.83759	25.895	12	4029100	2515900	1513200	19.8	11	11	1.73298	37.08	12	7331800	4722200	2609600
	311	O14949	UQCRQ	Cytochrome b-c1 complex subunit 8	>sp|O14949|QCR8_HUMAN Cytochrome b-c1 complex subunit 8 OS=Homo sapiens GN=UQCRQ PE=1 SV=4	9.9062	4.2187e-06	1		1.4898	0.173128	0.0229155	1.63987	0	0	0			0	0	0	0	15.9	1	1	1.3688	NaN	1	660680	322700	337980	11	1	1	1.78613	NaN	1	1273600	775810	497790	9.8	1	1	1.35248	22.923	2	2595500	1606600	988880
	161	E9PH64;E7EWZ0;Q9Y6M9;E9PF49	NDUFB9	NADH dehydrogenase [ubiquinone] 1 beta subcomplex subunit 9	>tr|E9PH64|E9PH64_HUMAN NADH dehydrogenase [ubiquinone] 1 beta subcomplex subunit 9 OS=Homo sapiens GN=NDUFB9 PE=1 SV=1;>tr|E7EWZ0|E7EWZ0_HUMAN NADH dehydrogenase [ubiquinone] 1 beta subcomplex subunit 9 OS=Homo sapiens GN=NDUFB9 PE=1 SV=1;>sp|Q9Y6M9|NDUB9	20.383	6.593e-21	4		1.48704	0.172321	0.00798693	2.09762	19	3	3	1.2318	89.972	4	4346800	1874200	2472600	19	3	3	1.4585	7.8212	3	3330400	1369500	1960900	19	3	3	1.81327	59.056	3	3022300	1848600	1173700	13.7	2	2	1.50098	60.478	6	4513700	2808300	1705400
	729	Q16795;H3BRM9;F5H0J3;F5GY40	NDUFA9	NADH dehydrogenase [ubiquinone] 1 alpha subcomplex subunit 9, mitochondrial	>sp|Q16795|NDUA9_HUMAN NADH dehydrogenase [ubiquinone] 1 alpha subcomplex subunit 9, mitochondrial OS=Homo sapiens GN=NDUFA9 PE=1 SV=2	42.509	1.2215e-70	4		1.48343	0.171266	0.00856347	2.06735	27.6	8	8	1.2707	46.494	8	4256600	1898500	2358100	16.4	4	4	1.341	70.142	5	1980300	813660	1166600	27.9	8	8	1.83776	52.197	8	3464500	2126500	1337900	30.2	9	9	1.54634	48.201	9	7137900	4423100	2714800
	589	P56556;R4GN43	NDUFA6	NADH dehydrogenase [ubiquinone] 1 alpha subcomplex subunit 6	>sp|P56556|NDUA6_HUMAN NADH dehydrogenase [ubiquinone] 1 alpha subcomplex subunit 6 OS=Homo sapiens GN=NDUFA6 PE=1 SV=3;>tr|R4GN43|R4GN43_HUMAN NADH dehydrogenase [ubiquinone] 1 alpha subcomplex subunit 6 OS=Homo sapiens GN=NDUFA6 PE=1 SV=1	17.871	1.6155e-12	2		1.47573	0.169006	0.00692771	2.15941	7.1	1	1	1.4243	12.218	2	1316200	518120	798060	29.2	4	4	1.2992	15.386	5	7963500	3592000	4371500	7.1	1	1	1.8309	2.4551	2	1044300	655130	389220	12.3	2	2	1.39985	25.602	3	3466400	1982500	1483900
	495	P25705;P25705-2;P25705-3;K7EK77;K7ERX7;K7ENJ4;K7EJP1;K7EQH4;K7ESA0	ATP5A1	ATP synthase subunit alpha, mitochondrial	>sp|P25705|ATPA_HUMAN ATP synthase subunit alpha, mitochondrial OS=Homo sapiens GN=ATP5A1 PE=1 SV=1;>sp|P25705-2|ATPA_HUMAN Isoform 2 of ATP synthase subunit alpha, mitochondrial OS=Homo sapiens GN=ATP5A1;>sp|P25705-3|ATPA_HUMAN Isoform 3 of ATP synthase s	59.75	0	9		1.47374	0.16842	0.0180676	1.7431	50.5	25	25	1.219	52.037	45	202900000	85542000	117360000	56.8	30	30	1.2412	30.045	48	251300000	109000000	142300000	54.1	26	26	1.85549	38.802	36	126820000	81333000	45491000	58	30	30	1.68025	39.152	54	310500000	192950000	117550000
	28	B3KRD1;B7Z4D2;Q9NX95-5;Q9NX95-2;Q9NX95-4;Q9NX95-3;Q9NX95	SYBU	Syntabulin	>tr|B3KRD1|B3KRD1_HUMAN Syntabulin OS=Homo sapiens GN=SYBU PE=2 SV=1;>tr|B7Z4D2|B7Z4D2_HUMAN Syntabulin OS=Homo sapiens GN=SYBU PE=2 SV=1;>sp|Q9NX95-5|SYBU_HUMAN Isoform 5 of Syntabulin OS=Homo sapiens GN=SYBU;>sp|Q9NX95-2|SYBU_HUMAN Isoform 2 of Syntabuli	50.463	4.0924e-14	7		1.47319	0.168259	0.0379804	1.42044	3.1	1	1	1.1619	28.541	3	1295400	588910	706460	3.1	1	1	1.1156	NaN	1	1197600	567590	629980	3.1	1	1	1.96591	5.1677	2	593750	367090	226660	3.1	1	1	1.84839	24.913	3	1359200	869840	489370
	180	E9PN17;O75964	ATP5L	ATP synthase subunit g, mitochondrial	>tr|E9PN17|E9PN17_HUMAN ATP synthase subunit g, mitochondrial OS=Homo sapiens GN=ATP5L PE=1 SV=1;>sp|O75964|ATP5L_HUMAN ATP synthase subunit g, mitochondrial OS=Homo sapiens GN=ATP5L PE=1 SV=3	8.4518	1.0456e-29	2		1.46638	0.166247	0.027885	1.55463	51.3	3	3	1.105	70.14	3	3848400	1728400	2119900	35.5	3	3	1.3023	23.868	4	4884900	1995000	2889900	47.4	4	4	1.86609	66.41	5	2966600	1885800	1080800	64.5	6	6	1.72179	56.525	7	15259000	9724600	5534100
	780	Q6ZRP7	QSOX2	Sulfhydryl oxidase 2	>sp|Q6ZRP7|QSOX2_HUMAN Sulfhydryl oxidase 2 OS=Homo sapiens GN=QSOX2 PE=1 SV=3	77.528	7.188e-07	1		1.46209	0.164975	0.0218092	1.66136	3.2	1	1	1.6985	NaN	1	718430	306420	412010	0	0	0			0	0	0	0	2.3	1	1	1.29363	NaN	1	55969	32758	23211	2.3	1	1	1.4225	NaN	1	171790	103810	67978
	193	Q9NVH1-3;F5H1N1;Q9NVH1;B4DGD5;Q9NVH1-2;Q9UMU8;B1AK20;Q5TH61	DNAJC11	DnaJ homolog subfamily C member 11	>sp|Q9NVH1-3|DJC11_HUMAN Isoform 3 of DnaJ homolog subfamily C member 11 OS=Homo sapiens GN=DNAJC11;>tr|F5H1N1|F5H1N1_HUMAN DnaJ homolog subfamily C member 11 OS=Homo sapiens GN=DNAJC11 PE=1 SV=1;>sp|Q9NVH1|DJC11_HUMAN DnaJ homolog subfamily C member 11 OS	57.196	1.448e-43	8		1.45567	0.163064	0.000829946	3.08095	15.4	5	5	1.3442	19.515	7	2233900	962270	1271600	6.1	2	2	1.4198	11.874	2	665150	265550	399590	12.8	4	4	1.60131	19.746	5	1284600	771780	512840	14.8	6	6	1.46923	23.645	7	5075900	2980800	2095100
	427	P08574	CYC1	Cytochrome c1, heme protein, mitochondrial	>sp|P08574|CY1_HUMAN Cytochrome c1, heme protein, mitochondrial OS=Homo sapiens GN=CYC1 PE=1 SV=3	35.422	1.587e-58	1		1.45464	0.162756	0.0191712	1.71735	24.3	6	6	1.2666	126.98	7	11845000	5188800	6656000	25.2	6	6	1.1716	65.887	10	12182000	5616800	6565600	11.7	3	3	1.81765	97.516	4	2800000	1779600	1020400	26.2	6	6	1.65994	58.577	10	13058000	7984500	5073000
	80	H7C1U8;C9J574;Q9BUR5-2;Q9BUR5;G3V1B6	APOO	Apolipoprotein O	>tr|H7C1U8|H7C1U8_HUMAN Apolipoprotein O (Fragment) OS=Homo sapiens GN=APOO PE=1 SV=1;>tr|C9J574|C9J574_HUMAN Apolipoprotein O OS=Homo sapiens GN=APOO PE=1 SV=1;>sp|Q9BUR5-2|APOO_HUMAN Isoform 2 of Apolipoprotein O OS=Homo sapiens GN=APOO;>sp|Q9BUR5|APOO_H	20.08	7.6887e-22	5		1.4515	0.161818	0.00132175	2.87885	14	2	2	1.3184	5.0826	2	4051600	1656000	2395600	18	3	3	1.4048	128.88	3	4264600	1765900	2498700	25.8	4	4	1.52151	68.795	4	5191000	3237800	1953200	29.8	5	5	1.5752	59.154	7	9172600	5711900	3460800
	1003	Q9P2E9-3;Q9P2E9-2;Q9P2E9;F8W7S5;A2A2S5;Q8N4C6-6;F8W6D3;Q8N4C6-11;H0YDJ4;H9KV85;E9PN67;Q8N4C6-4;C9J066;Q8N4C6-9;Q8N4C6-2;Q8N4C6;Q8N4C6-5;Q8N4C6-10;Q8N4C6-7	RRBP1	Ribosome-binding protein 1	>sp|Q9P2E9-3|RRBP1_HUMAN Isoform 2 of Ribosome-binding protein 1 OS=Homo sapiens GN=RRBP1;>sp|Q9P2E9-2|RRBP1_HUMAN Isoform 1 of Ribosome-binding protein 1 OS=Homo sapiens GN=RRBP1;>sp|Q9P2E9|RRBP1_HUMAN Ribosome-binding protein 1 OS=Homo sapiens GN=RRBP1 P	108.63	2.8726e-82	19		1.44671	0.160382	0.00453472	2.34345	13.3	10	10	1.4078	19.787	11	4073900	1615600	2458300	2.4	2	2	1.2391	13.012	2	519410	223900	295520	2.3	2	2	1.54409	33.843	2	511080	305290	205790	8.7	6	6	1.62633	8.2948	7	1891200	1108200	783000
	433	P47985;P0C7P4	UQCRFS1;UQCRFS1P1	Cytochrome b-c1 complex subunit Rieske, mitochondrial;Cytochrome b-c1 complex subunit 11;Putative cytochrome b-c1 complex subunit Rieske-like protein 1	>sp|P47985|UCRI_HUMAN Cytochrome b-c1 complex subunit Rieske, mitochondrial OS=Homo sapiens GN=UQCRFS1 PE=1 SV=2;>sp|P0C7P4|UCRIL_HUMAN Putative cytochrome b-c1 complex subunit Rieske-like protein 1 OS=Homo sapiens GN=UQCRFS1P1 PE=5 SV=1	29.668	4.6629e-07	2		1.44599	0.160166	0.00831228	2.08028	3.3	1	1	1.3102	NaN	1	9600400	4465300	5135100	6.2	2	2	1.2329	125.15	2	8810200	3875100	4935100	13.9	3	3	1.58622	94.571	5	12925000	8394300	4530700	3.3	1	1	1.70622	74.287	2	4435800	2716300	1719500
	342	O75380;D6RBT3	NDUFS6	NADH dehydrogenase [ubiquinone] iron-sulfur protein 6, mitochondrial	>sp|O75380|NDUS6_HUMAN NADH dehydrogenase [ubiquinone] iron-sulfur protein 6, mitochondrial OS=Homo sapiens GN=NDUFS6 PE=1 SV=1;>tr|D6RBT3|D6RBT3_HUMAN NADH dehydrogenase [ubiquinone] iron-sulfur protein 6, mitochondrial OS=Homo sapiens GN=NDUFS6 PE=1 SV=1	13.711	3.4447e-29	2		1.43579	0.15709	0.0377616	1.42295	12.1	1	1	1.0521	NaN	1	788020	447980	340040	43.5	3	3	1.2627	24.947	4	2929300	1251400	1677900	24.2	2	2	1.84488	83.58	3	957570	615710	341860	33.9	3	3	1.73394	128.37	2	1816500	1071500	745010
	366	O95182;M0R0N0	NDUFA7	NADH dehydrogenase [ubiquinone] 1 alpha subcomplex subunit 7	>sp|O95182|NDUA7_HUMAN NADH dehydrogenase [ubiquinone] 1 alpha subcomplex subunit 7 OS=Homo sapiens GN=NDUFA7 PE=1 SV=3	12.551	3.5092e-26	2		1.42595	0.154105	0.00686705	2.16323	15.9	1	1	1.3499	NaN	1	356000	149010	206980	25.7	3	3	1.2038	12.268	4	2697600	1250400	1447200	23.9	2	2	1.60267	64.542	2	975630	589950	385680	23.9	2	2	1.58753	39.063	3	2788600	1743700	1044900
	804	Q86Y39;K7EQ77;K7EK78;K7EP35;K7EMT4;Q86Y39-2;K7ELJ0	NDUFA11	NADH dehydrogenase [ubiquinone] 1 alpha subcomplex subunit 11	>sp|Q86Y39|NDUAB_HUMAN NADH dehydrogenase [ubiquinone] 1 alpha subcomplex subunit 11 OS=Homo sapiens GN=NDUFA11 PE=1 SV=3;>tr|K7EQ77|K7EQ77_HUMAN NADH dehydrogenase [ubiquinone] 1 alpha subcomplex subunit 11 OS=Homo sapiens GN=NDUFA11 PE=4 SV=1;>tr|K7EK78|	14.852	3.1343e-42	7		1.4245	0.153664	0.0211885	1.6739	27	2	2	1.0637	3.0679	2	1961000	1017300	943650	44	4	4	1.4256	94.809	5	8531800	3768300	4763500	16.3	1	1	1.73187	NaN	1	605940	378870	227080	27	2	2	1.56791	35.109	2	3239500	1875900	1363600
	216	P49821-2;G3V0I5;P49821;B4DE93;H0YE81;E9PLC6;E9PQP1;E9PMX3;E9PPR0;E9PJL9;E9PPS5;H0YD04	NDUFV1	NADH dehydrogenase [ubiquinone] flavoprotein 1, mitochondrial	>sp|P49821-2|NDUV1_HUMAN Isoform 2 of NADH dehydrogenase [ubiquinone] flavoprotein 1, mitochondrial OS=Homo sapiens GN=NDUFV1;>tr|G3V0I5|G3V0I5_HUMAN NADH dehydrogenase (Ubiquinone) flavoprotein 1, 51kDa, isoform CRA_c OS=Homo sapiens GN=NDUFV1 PE=1 SV=1;>	49.867	4.9102e-124	12		1.42377	0.15344	0.0107404	1.96898	17.4	5	5	1.3098	37.764	5	10161000	4489000	5671900	32.3	9	9	1.2051	38.825	10	21800000	9678800	12122000	18	5	5	1.74862	62.114	5	5844800	3705700	2139100	18	5	5	1.4888	56.397	5	10462000	6304900	4157500
	1041	Q9Y657	SPIN1	Spindlin-1	>sp|Q9Y657|SPIN1_HUMAN Spindlin-1 OS=Homo sapiens GN=SPIN1 PE=1 SV=3	29.6	0.0015417	1		1.42285	0.15316	0.00198414	2.70243	0	0	0			0	0	0	0	0	0	0			0	0	0	0	5	1	1	1.42598	NaN	1	203910	114790	89115	5	1	1	1.41973	NaN	1	164010	104060	59945
	310	O14893-2;O14893;H0YEL0;O14893-3;G5EA29;H0YDP6;S4R421	GEMIN2	Gem-associated protein 2	>sp|O14893-2|GEMI2_HUMAN Isoform 2 of Gem-associated protein 2 OS=Homo sapiens GN=GEMIN2;>sp|O14893|GEMI2_HUMAN Gem-associated protein 2 OS=Homo sapiens GN=GEMIN2 PE=1 SV=1;>tr|H0YEL0|H0YEL0_HUMAN Gem-associated protein 2 (Fragment) OS=Homo sapiens GN=GEMI	29.931	4.8664e-80	7		1.42008	0.152314	0.00457162	2.33993	30.6	7	7	1.2334	77.76	10	7294000	3091900	4202100	35.1	8	8	1.3767	83.506	11	10934000	4538500	6395300	33.2	8	8	1.46246	72.397	9	6680300	3968600	2711800	33.2	8	8	1.63768	68.375	9	8707200	5312400	3394900
	1012	Q9UJZ1;Q9UJZ1-2;F2Z2I8	STOML2	Stomatin-like protein 2, mitochondrial	>sp|Q9UJZ1|STML2_HUMAN Stomatin-like protein 2, mitochondrial OS=Homo sapiens GN=STOML2 PE=1 SV=1;>sp|Q9UJZ1-2|STML2_HUMAN Isoform 2 of Stomatin-like protein 2, mitochondrial OS=Homo sapiens GN=STOML2	38.534	0	3		1.41876	0.151908	0.0262422	1.581	48	13	13	1.1503	91.608	13	53006000	23846000	29161000	47.8	12	12	1.2051	71.138	13	85139000	36739000	48400000	52.8	14	14	1.81429	66.554	14	43746000	28637000	15109000	56.5	16	16	1.61098	60.014	18	101730000	62933000	38795000
	588	P56385	ATP5I	ATP synthase subunit e, mitochondrial	>sp|P56385|ATP5I_HUMAN ATP synthase subunit e, mitochondrial OS=Homo sapiens GN=ATP5I PE=1 SV=2	7.9331	5.0274e-13	1		1.4171	0.1514	0.0336341	1.47322	14.5	1	1	1.0357	NaN	1	1817100	905280	911790	44.9	3	3	1.2751	95.061	3	8014100	3353200	4660800	20.3	1	1	1.7744	NaN	1	845070	533840	311240	30.4	2	2	1.72096	6.2546	2	6788100	4252000	2536100
	1006	Q9UDW1;Q9UDW1-2	UQCR10	Cytochrome b-c1 complex subunit 9	>sp|Q9UDW1|QCR9_HUMAN Cytochrome b-c1 complex subunit 9 OS=Homo sapiens GN=UQCR10 PE=1 SV=3;>sp|Q9UDW1-2|QCR9_HUMAN Isoform 2 of Cytochrome b-c1 complex subunit 9 OS=Homo sapiens GN=UQCR10	7.3084	1.1112e-23	2		1.41584	0.151014	0.0195335	1.70922	0	0	0			0	0	0	0	38.1	2	2	1.2862	106.16	2	3210800	1319900	1890900	38.1	2	2	1.62959	1.1462	2	1147400	723390	423970	38.1	2	2	1.35411	22.487	2	2706500	1631000	1075500
	355	O76031;H0YM48;H0YK07	CLPX	ATP-dependent Clp protease ATP-binding subunit clpX-like, mitochondrial	>sp|O76031|CLPX_HUMAN ATP-dependent Clp protease ATP-binding subunit clpX-like, mitochondrial OS=Homo sapiens GN=CLPX PE=1 SV=2	69.223	6.0924e-30	3		1.40274	0.146978	0.0203507	1.69142	8.5	4	4	1.8134	26.661	7	1766300	638920	1127400	14.4	7	7	1.327	22.275	11	4363400	1882300	2481100	7.9	4	4	1.15331	71.182	8	2491500	848480	1643000	10.1	5	5	1.39509	33.935	7	3291200	1771100	1520200
	430	P09622;P09622-3;E9PEX6;P09622-2;F8WDM5;F2Z2E3	DLD	Dihydrolipoyl dehydrogenase, mitochondrial	>sp|P09622|DLDH_HUMAN Dihydrolipoyl dehydrogenase, mitochondrial OS=Homo sapiens GN=DLD PE=1 SV=2;>sp|P09622-3|DLDH_HUMAN Isoform 3 of Dihydrolipoyl dehydrogenase, mitochondrial OS=Homo sapiens GN=DLD;>tr|E9PEX6|E9PEX6_HUMAN Dihydrolipoyl dehydrogenase, mi	54.177	5.8408e-280	6		1.38596	0.14175	0.00768723	2.11423	51.3	20	20	1.2603	19.913	39	62232000	27206000	35026000	47.3	18	18	1.2365	27.159	38	68942000	30219000	38723000	43.4	16	16	1.61946	42.609	30	37189000	21764000	15425000	40.7	17	17	1.46205	47.875	32	76673000	43880000	32793000
	554	P48047;H7C0C1;H7C086;H7C068	ATP5O	ATP synthase subunit O, mitochondrial	>sp|P48047|ATPO_HUMAN ATP synthase subunit O, mitochondrial OS=Homo sapiens GN=ATP5O PE=1 SV=1;>tr|H7C0C1|H7C0C1_HUMAN Uncharacterized protein (Fragment) OS=Homo sapiens PE=4 SV=1	23.277	6.6042e-18	4		1.38359	0.141008	0.0107009	1.97058	4.2	1	1	1.4284	NaN	1	1330100	565850	764210	17.8	3	3	1.2674	19.987	4	6604600	2699600	3904900	19.2	4	4	1.46306	97.041	5	16321000	9954600	6366000	0	0	0			0	0	0	0
	948	Q9H840	GEMIN7	Gem-associated protein 7	>sp|Q9H840|GEMI7_HUMAN Gem-associated protein 7 OS=Homo sapiens GN=GEMIN7 PE=1 SV=1	14.536	1.2049e-24	1		1.38299	0.140818	0.00593485	2.22659	9.9	1	1	1.1936	NaN	1	629650	296790	332860	35.1	2	2	1.3177	19.227	2	2386200	1066700	1319600	43.5	3	3	1.50941	4.9638	2	1816400	953710	862720	18.3	2	2	1.54095	76.112	2	3334300	1935100	1399100
	692	Q13505-3;Q13505;Q13505-2	MTX1	Metaxin-1	>sp|Q13505-3|MTX1_HUMAN Isoform 3 of Metaxin-1 OS=Homo sapiens GN=MTX1;>sp|Q13505|MTX1_HUMAN Metaxin-1 OS=Homo sapiens GN=MTX1 PE=1 SV=2;>sp|Q13505-2|MTX1_HUMAN Isoform 2 of Metaxin-1 OS=Homo sapiens GN=MTX1	35.777	8.4475e-49	3		1.37337	0.137787	0.0207568	1.68284	11	4	4	1.0581	52.573	4	2201300	1009900	1191400	12	4	4	1.4373	31.518	4	1614200	695240	918940	19.9	6	6	1.58373	30.601	7	2923000	1794100	1128900	24.6	7	7	1.47704	22.625	8	6164100	3687600	2476500
	941	Q9H3G5;H7C0X5;H7C218;C9JLV0;C9J6L4;C9JI22	CPVL	Probable serine carboxypeptidase CPVL	>sp|Q9H3G5|CPVL_HUMAN Probable serine carboxypeptidase CPVL OS=Homo sapiens GN=CPVL PE=1 SV=2;>tr|H7C0X5|H7C0X5_HUMAN Probable serine carboxypeptidase CPVL (Fragment) OS=Homo sapiens GN=CPVL PE=1 SV=1	54.163	8.6002e-96	6		1.36931	0.136501	0.0367528	1.43471	23.9	10	10	1.104	107.09	20	17170000	8604900	8564600	31.9	13	13	1.1396	90.227	31	27561000	12871000	14691000	20.4	8	8	1.5934	94.839	21	14988000	8919300	6068800	19.1	9	9	1.75371	70.772	24	25580000	16135000	9444500
	462	P14927;P14927-2;B7Z2R2;E5RHG9	UQCRB	Cytochrome b-c1 complex subunit 7	>sp|P14927|QCR7_HUMAN Cytochrome b-c1 complex subunit 7 OS=Homo sapiens GN=UQCRB PE=1 SV=2;>sp|P14927-2|QCR7_HUMAN Isoform 2 of Cytochrome b-c1 complex subunit 7 OS=Homo sapiens GN=UQCRB;>tr|B7Z2R2|B7Z2R2_HUMAN Cytochrome b-c1 complex subunit 7 OS=Homo sap	13.53	2.9957e-73	4		1.35667	0.132474	0.0213044	1.67153	31.5	3	3	1.1827	21.188	3	3442600	1552900	1889700	49.5	5	5	1.1447	6.5741	7	12596000	5574400	7021700	43.2	4	4	1.58748	87.033	4	3076000	1801000	1275000	49.5	6	6	1.57624	43.986	7	12173000	7311200	4861400
	400	P04181;P04181-2	OAT	Ornithine aminotransferase, mitochondrial;Ornithine aminotransferase, hepatic form;Ornithine aminotransferase, renal form	>sp|P04181|OAT_HUMAN Ornithine aminotransferase, mitochondrial OS=Homo sapiens GN=OAT PE=1 SV=1;>sp|P04181-2|OAT_HUMAN Isoform 2 of Ornithine aminotransferase, mitochondrial OS=Homo sapiens GN=OAT	48.534	2.5644e-268	2		1.35632	0.132363	0.0105003	1.9788	45.1	17	17	1.2154	101.07	26	124580000	55656000	68925000	49	21	21	1.2133	74.938	66	178700000	77104000	101590000	53.5	22	22	1.54381	81.031	35	106340000	62292000	44050000	52.4	22	22	1.48652	67.262	35	210070000	123190000	86886000
	139	E5RHW4;O94905;O94905-2;E5RJ09;O94905-3	ERLIN2	Erlin-2	>tr|E5RHW4|E5RHW4_HUMAN Erlin-2 (Fragment) OS=Homo sapiens GN=ERLIN2 PE=1 SV=1;>sp|O94905|ERLN2_HUMAN Erlin-2 OS=Homo sapiens GN=ERLIN2 PE=1 SV=1;>sp|O94905-2|ERLN2_HUMAN Isoform 2 of Erlin-2 OS=Homo sapiens GN=ERLIN2;>tr|E5RJ09|E5RJ09_HUMAN Erlin-2 (Fragm	37.725	1.9379e-55	5		1.35375	0.13154	0.00886809	2.05217	10.7	3	1	1.4957	94.025	2	1180000	459280	720750	12.7	4	1	1.1263	19.435	2	2083900	1010200	1073700	18.9	5	3	1.44779	48.228	3	850260	509570	340690	21	6	3	1.37707	67.481	3	2453800	1381700	1072100
	42	Q9Y3F4;B4DNJ6;B0AZV0;H0YH33	STRAP	Serine-threonine kinase receptor-associated protein	>sp|Q9Y3F4|STRAP_HUMAN Serine-threonine kinase receptor-associated protein OS=Homo sapiens GN=STRAP PE=1 SV=1;>tr|B4DNJ6|B4DNJ6_HUMAN Serine-threonine kinase receptor-associated protein OS=Homo sapiens GN=STRAP PE=1 SV=1;>tr|B0AZV0|B0AZV0_HUMAN Serine-thre	38.438	1.481e-264	4		1.35128	0.130747	5.17583e-05	4.28602	41.1	11	11	1.3762	64.517	30	20903000	8864500	12039000	53.4	14	14	1.3155	81.274	33	38523000	15355000	23169000	44.6	12	12	1.36608	78.757	28	16532000	9297000	7234700	50.9	13	13	1.34814	72.608	25	28805000	16360000	12445000
	587	P56181-2			>sp|P56181-2|NDUV3_HUMAN Isoform 2 of NADH dehydrogenase [ubiquinone] flavoprotein 3, mitochondrial OS=Homo sapiens GN=NDUFV3	50.983	1.0648e-63	1		1.34638	0.129169	0.0045978	2.33745	17.5	6	6	1.2297	19.525	9	5318300	2348400	2969900	5.1	2	2	1.2773	21.177	2	464260	205390	258870	13.1	5	5	1.54419	109.4	7	3772800	2694700	1078100	21.6	7	7	1.35483	81.74	10	10414000	6782900	3631100
	485	P22695;H3BRG4;H3BSJ9;H3BP04;H3BUE4;H3BUI9	UQCRC2	Cytochrome b-c1 complex subunit 2, mitochondrial	>sp|P22695|QCR2_HUMAN Cytochrome b-c1 complex subunit 2, mitochondrial OS=Homo sapiens GN=UQCRC2 PE=1 SV=3;>tr|H3BRG4|H3BRG4_HUMAN Cytochrome b-c1 complex subunit 2, mitochondrial OS=Homo sapiens GN=UQCRC2 PE=1 SV=1;>tr|H3BSJ9|H3BSJ9_HUMAN Cytochrome b-c1	48.442	5.9863e-181	6		1.33605	0.125822	0.0197306	1.70486	29.6	10	10	1.1945	81.018	15	27181000	12659000	14522000	43.3	16	16	1.1346	73.985	27	63581000	28765000	34816000	32.5	12	12	1.57803	73.54	20	23387000	14059000	9327300	40.2	14	14	1.48985	79.194	26	46666000	27149000	19517000
	257	I3L2C7;P57678;I3L399;I3L4A4;I3L4M4;E7EN12;I3L1J7	GEMIN4	Gem-associated protein 4	>tr|I3L2C7|I3L2C7_HUMAN Gem-associated protein 4 OS=Homo sapiens GN=GEMIN4 PE=1 SV=1;>sp|P57678|GEMI4_HUMAN Gem-associated protein 4 OS=Homo sapiens GN=GEMIN4 PE=1 SV=2	118.82	0	7		1.33593	0.125782	1.35553e-05	4.86789	42.3	41	41	1.3207	22.994	132	136740000	57686000	79058000	42.1	38	38	1.3071	26.289	113	133920000	56959000	76964000	43.1	37	37	1.35604	29.864	117	92138000	52402000	39736000	38.3	36	36	1.36064	22.872	115	150840000	85574000	65262000
	327	O43837;O43837-2;O43837-3	IDH3B	Isocitrate dehydrogenase [NAD] subunit beta, mitochondrial	>sp|O43837|IDH3B_HUMAN Isocitrate dehydrogenase [NAD] subunit beta, mitochondrial OS=Homo sapiens GN=IDH3B PE=1 SV=2;>sp|O43837-2|IDH3B_HUMAN Isoform A of Isocitrate dehydrogenase [NAD] subunit beta, mitochondrial OS=Homo sapiens GN=IDH3B	42.183	7.1953e-07	3		1.33358	0.125018	0.0372726	1.42861	0	0	0			0	0	0	0	5.5	2	2	1.2216	27.757	3	2426300	1055900	1370400	2.6	1	1	1.57072	NaN	1	1281700	735510	546180	2.6	1	1	1.23602	40.165	2	4218900	2736300	1482600
	297	O00165-5;O00165;O00165-2;O00165-3;O00165-4;E9PIQ7;Q5VYD6;O00165-6	HAX1	HCLS1-associated protein X-1	>sp|O00165-5|HAX1_HUMAN Isoform 5 of HCLS1-associated protein X-1 OS=Homo sapiens GN=HAX1;>sp|O00165|HAX1_HUMAN HCLS1-associated protein X-1 OS=Homo sapiens GN=HAX1 PE=1 SV=2;>sp|O00165-2|HAX1_HUMAN Isoform 2 of HCLS1-associated protein X-1 OS=Homo sapiens	26.099	8.2778e-11	8		1.33332	0.124934	0.0169895	1.76982	5.2	1	1	1.2083	NaN	1	444220	195530	248690	0	0	0			0	0	0	0	24.7	4	4	1.44517	23.092	4	1328000	711120	616890	13.9	3	3	1.3574	38.219	3	2593000	1520800	1072200
	979	Q9NWZ8;H7BYE2	GEMIN8	Gem-associated protein 8	>sp|Q9NWZ8|GEMI8_HUMAN Gem-associated protein 8 OS=Homo sapiens GN=GEMIN8 PE=1 SV=1	28.636	1.0232e-06	2		1.32823	0.123272	0.000367054	3.43527	8.7	2	2	1.3938	17.543	9	3008500	1194600	1813900	12.4	4	4	1.3348	11.697	7	5455200	2337700	3117500	3.7	1	1	1.33348	24.687	6	853790	489740	364050	7	2	2	1.25455	23.838	5	2620400	1452400	1168000
	528	P36551;H0YA22;D6RER6	CPOX	Coproporphyrinogen-III oxidase, mitochondrial	>sp|P36551|HEM6_HUMAN Oxygen-dependent coproporphyrinogen-III oxidase, mitochondrial OS=Homo sapiens GN=CPOX PE=1 SV=3	50.151	2.6566e-14	3		1.32556	0.122401	0.0330788	1.48045	6.8	3	3	1.0194	30.899	3	1364900	570250	794670	4.8	2	2	1.2532	109.63	2	930690	398890	531810	15.4	6	6	1.58333	42.582	6	2133900	1238500	895310	4.4	2	2	1.52639	35.092	2	1520000	872620	647360
	1008	Q9UHI6;E9PJ60;B4DWV7	DDX20	Probable ATP-dependent RNA helicase DDX20	>sp|Q9UHI6|DDX20_HUMAN Probable ATP-dependent RNA helicase DDX20 OS=Homo sapiens GN=DDX20 PE=1 SV=2	92.239	0	3		1.32314	0.121605	6.54455e-05	4.18412	46.6	30	30	1.3363	32.95	109	132270000	54132000	78139000	47.9	30	30	1.3415	27.732	59	116490000	48254000	68237000	41.4	28	28	1.29027	32.036	89	67420000	36246000	31175000	43.2	28	28	1.32508	29.365	102	135250000	75430000	59823000
	762	Q5XKP0;K7EIR2;K7EKR0	QIL1;C19orf70	Protein QIL1	>sp|Q5XKP0|QIL1_HUMAN Protein QIL1 OS=Homo sapiens GN=QIL1 PE=1 SV=1;>tr|K7EIR2|K7EIR2_HUMAN Protein QIL1 OS=Homo sapiens GN=C19orf70 PE=4 SV=1;>tr|K7EKR0|K7EKR0_HUMAN Protein QIL1 OS=Homo sapiens GN=C19orf70 PE=4 SV=1	13.087	1.9769e-43	3		1.3143	0.118694	0.00791006	2.10182	0	0	0			0	0	0	0	28	2	2	1.4068	14.337	2	1905600	875560	1030100	28	2	2	1.29395	31.246	2	672640	378370	294260	18.6	1	1	1.24719	58.724	2	1302500	690110	612390
	989	Q9NZB2;Q9NZB2-6;Q9NZB2-4;Q9NZB2-5;Q9NZB2-2;Q5T035;F8W881;Q9NX05	FAM120A	Constitutive coactivator of PPAR-gamma-like protein 1	>sp|Q9NZB2|F120A_HUMAN Constitutive coactivator of PPAR-gamma-like protein 1 OS=Homo sapiens GN=FAM120A PE=1 SV=2;>sp|Q9NZB2-6|F120A_HUMAN Isoform F of Constitutive coactivator of PPAR-gamma-like protein 1 OS=Homo sapiens GN=FAM120A;>sp|Q9NZB2-4|F120A_HUMA	121.89	0	8		1.30871	0.116842	0.00794969	2.09965	32.6	28	28	1.1849	37.491	54	53657000	23871000	29785000	23.1	19	19	1.1991	31.673	27	19258000	8729900	10528000	33.5	30	30	1.44932	47.624	52	46797000	26677000	20121000	37.6	31	31	1.42452	42.113	52	66699000	39808000	26891000
	892	Q96S66-2;Q96S66;Q96S66-3;Q96S66-4	CLCC1	Chloride channel CLIC-like protein 1	>sp|Q96S66-2|CLCC1_HUMAN Isoform 2 of Chloride channel CLIC-like protein 1 OS=Homo sapiens GN=CLCC1;>sp|Q96S66|CLCC1_HUMAN Chloride channel CLIC-like protein 1 OS=Homo sapiens GN=CLCC1 PE=1 SV=1;>sp|Q96S66-3|CLCC1_HUMAN Isoform 3 of Chloride channel CLIC-l	56.266	2.6217e-17	4		1.30193	0.114589	0.00757914	2.12038	9	2	2	1.3725	48.763	4	1055600	500350	555280	0	0	0			0	0	0	0	7.4	3	3	1.22977	13.142	4	577940	314910	263030	4.4	2	2	1.30746	35.058	3	766400	405700	360700
	65	Q9BUJ2-4;B7Z4B8;Q9BUJ2-2;Q9BUJ2;M0R3F1;Q9BUJ2-3;M0QYZ0;M0QYM5;M0QYI8;M0R203;M0QZV6;M0R0K8	HNRNPUL1	Heterogeneous nuclear ribonucleoprotein U-like protein 1	>sp|Q9BUJ2-4|HNRL1_HUMAN Isoform 4 of Heterogeneous nuclear ribonucleoprotein U-like protein 1 OS=Homo sapiens GN=HNRNPUL1;>tr|B7Z4B8|B7Z4B8_HUMAN Heterogeneous nuclear ribonucleoprotein U-like protein 1 OS=Homo sapiens GN=HNRNPUL1 PE=1 SV=1;>sp|Q9BUJ2-2|H	84.793	1.1927e-32	12		1.29693	0.112916	0.0266809	1.5738	3.7	2	2	1.1457	5.4327	2	679460	307880	371580	0	0	0			0	0	0	0	11.1	7	7	1.3971	15.024	7	2003800	1172300	831500	6.2	4	4	1.36286	43.903	4	2667200	1348700	1318500
	843	Q8TEQ6	GEMIN5	Gem-associated protein 5	>sp|Q8TEQ6|GEMI5_HUMAN Gem-associated protein 5 OS=Homo sapiens GN=GEMIN5 PE=1 SV=3	168.59	0	1		1.2969	0.112908	1.74016e-05	4.75941	33	38	38	1.307	44.687	98	90809000	41676000	49134000	21.4	28	28	1.2887	35.31	57	48536000	21059000	27477000	24.8	31	31	1.31546	42.302	72	49629000	30830000	18799000	26.1	32	32	1.27681	56.61	81	81684000	42057000	39626000
	814	Q8IXI1;H3BST5;I3L2C6;Q8IXI1-2;H3BUX4;H3BU27;H3BMP9;H3BVI5	RHOT2	Mitochondrial Rho GTPase 2	>sp|Q8IXI1|MIRO2_HUMAN Mitochondrial Rho GTPase 2 OS=Homo sapiens GN=RHOT2 PE=1 SV=2;>tr|H3BST5|H3BST5_HUMAN Mitochondrial Rho GTPase 2 (Fragment) OS=Homo sapiens GN=RHOT2 PE=1 SV=2;>tr|I3L2C6|I3L2C6_HUMAN Mitochondrial Rho GTPase 2 (Fragment) OS=Homo sapi	68.117	1.7755e-196	8		1.2961	0.112638	0.0158325	1.80045	24.3	11	10	1.1144	26.477	13	10191000	4722700	5468000	33.8	14	13	1.1905	24.993	17	26035000	11455000	14581000	25.7	11	10	1.506	25.89	16	9272300	5332800	3939500	30.6	13	12	1.41239	17.807	18	22298000	13035000	9263200
	1036	Q9Y3L5	RAP2C	Ras-related protein Rap-2c	>sp|Q9Y3L5|RAP2C_HUMAN Ras-related protein Rap-2c OS=Homo sapiens GN=RAP2C PE=1 SV=1	20.745	0.0015336	1		1.29558	0.112463	0.0101993	1.99143	4.9	1	1	1.322	21	3	3334500	1508200	1826400	4.9	1	1	1.21	6.248	3	6329500	2822200	3507200	4.9	1	1	1.16732	16.531	5	2910800	1687400	1223400	4.9	1	1	1.50884	30.507	3	4692300	2864500	1827800
	444	P11177-2;P11177;P11177-3;C9J634;F8WF02	PDHB	Pyruvate dehydrogenase E1 component subunit beta, mitochondrial	>sp|P11177-2|ODPB_HUMAN Isoform 2 of Pyruvate dehydrogenase E1 component subunit beta, mitochondrial OS=Homo sapiens GN=PDHB;>sp|P11177|ODPB_HUMAN Pyruvate dehydrogenase E1 component subunit beta, mitochondrial OS=Homo sapiens GN=PDHB PE=1 SV=3;>sp|P11177-	37.2	1.5688e-96	5		1.29523	0.112349	0.0101993	1.99143	30.8	10	10	1.208	80.847	14	18031000	7834100	10197000	46.9	13	13	1.1509	82.089	22	27104000	12384000	14721000	32	9	9	1.44259	62.823	17	11652000	6866600	4785000	40.8	12	12	1.40329	76.291	19	29569000	17109000	12460000
	802	Q86UP2;Q86UP2-2;Q86UP2-4;Q86UP2-3;G3V4Y7;B7Z6P3;H0YJZ8;G3V5G2;G3V5P0;H0YJP2	KTN1	Kinectin	>sp|Q86UP2|KTN1_HUMAN Kinectin OS=Homo sapiens GN=KTN1 PE=1 SV=1;>sp|Q86UP2-2|KTN1_HUMAN Isoform 2 of Kinectin OS=Homo sapiens GN=KTN1;>sp|Q86UP2-4|KTN1_HUMAN Isoform 4 of Kinectin OS=Homo sapiens GN=KTN1;>sp|Q86UP2-3|KTN1_HUMAN Isoform 3 of Kinectin OS=Ho	156.27	9.8429e-211	10		1.28766	0.109801	0.0069629	2.15721	12.8	15	15	1.1437	27.48	31	18542000	7928800	10614000	7.4	8	8	1.2211	11.173	10	8598000	3751000	4847000	15.4	18	18	1.42375	25.482	28	14224000	8853700	5369900	16.4	18	18	1.38263	32.52	31	29878000	17201000	12677000
	472	P19338;H7BY16	NCL	Nucleolin	>sp|P19338|NUCL_HUMAN Nucleolin OS=Homo sapiens GN=NCL PE=1 SV=3	76.613	9.1737e-07	2		1.28668	0.109469	0.00017285	3.76233	2.7	2	2	1.2865	72.825	2	548210	248200	300020	0	0	0			0	0	0	0	3.7	3	3	1.28685	35.445	3	981090	578130	402970	0	0	0			0	0	0	0
	514	P31930	UQCRC1	Cytochrome b-c1 complex subunit 1, mitochondrial	>sp|P31930|QCR1_HUMAN Cytochrome b-c1 complex subunit 1, mitochondrial OS=Homo sapiens GN=UQCRC1 PE=1 SV=3	52.645	2.7842e-242	1		1.28353	0.108405	0.0312191	1.50558	32.7	9	9	1.033	87.631	10	35845000	17649000	18196000	52.5	15	15	1.2317	71.993	20	74740000	33315000	41425000	21.7	7	7	1.4403	85.499	10	15619000	8890100	6728700	29.4	9	9	1.48102	92.499	14	38493000	22297000	16196000
	343	O75381-2;O75381;K7EK59;F5H4J2	PEX14	Peroxisomal membrane protein PEX14	>sp|O75381-2|PEX14_HUMAN Isoform 2 of Peroxisomal membrane protein PEX14 OS=Homo sapiens GN=PEX14;>sp|O75381|PEX14_HUMAN Peroxisomal membrane protein PEX14 OS=Homo sapiens GN=PEX14 PE=1 SV=1;>tr|K7EK59|K7EK59_HUMAN Peroxisomal membrane protein PEX14 (Fragm	36.701	9.778e-16	4		1.27268	0.104718	0.000251582	3.59932	9.3	3	3	1.2247	15.694	3	1187500	542810	644710	5.7	2	2	1.2644	10.304	2	577470	257730	319740	5.7	2	2	1.33207	24.596	2	679370	371350	308030	5.7	2	2	1.27183	2.8587	2	1234400	674330	560050
	496	P26196	DDX6	Probable ATP-dependent RNA helicase DDX6	>sp|P26196|DDX6_HUMAN Probable ATP-dependent RNA helicase DDX6 OS=Homo sapiens GN=DDX6 PE=1 SV=2	54.416	2.8307e-240	1		1.27225	0.104572	9.6683e-05	4.01465	51.1	17	17	1.2472	36.838	21	17455000	7836500	9618600	51.1	18	18	1.2591	10.301	20	22761000	9882400	12879000	44.7	15	15	1.30565	21.852	16	10507000	5733800	4773200	41.8	14	14	1.27781	51.054	16	16800000	9400700	7399400
	610	P62304	SNRPE	Small nuclear ribonucleoprotein E	>sp|P62304|RUXE_HUMAN Small nuclear ribonucleoprotein E OS=Homo sapiens GN=SNRPE PE=1 SV=1	10.803	4.1398e-05	1		1.26102	0.100721	0.0289441	1.53844	0	0	0			0	0	0	0	12	1	1	1.2027	NaN	1	4713800	2149200	2564600	12	1	1	1.17612	NaN	1	1754800	890220	864600	12	1	1	1.4176	35.608	2	6211500	3337300	2874200
	910	Q9BSJ8;Q9BSJ8-2;F8VZB1	ESYT1	Extended synaptotagmin-1	>sp|Q9BSJ8|ESYT1_HUMAN Extended synaptotagmin-1 OS=Homo sapiens GN=ESYT1 PE=1 SV=1;>sp|Q9BSJ8-2|ESYT1_HUMAN Isoform 2 of Extended synaptotagmin-1 OS=Homo sapiens GN=ESYT1	122.85	1.846e-37	3		1.26001	0.100373	0.0331375	1.47968	6.2	5	5	1.026	28.937	5	4320700	2188700	2132000	1.2	1	1	1.2318	39.549	2	1055500	459640	595860	4.3	3	3	1.33136	38.774	5	1858400	1047300	811080	7.7	6	6	1.49799	19.119	6	5473100	3215100	2258000
	426	P08559;P08559-2;P08559-4;P08559-3;Q5JPU3;Q5JPT9;P29803;Q5JPU0;Q5JPU1	PDHA1	Pyruvate dehydrogenase E1 component subunit alpha, somatic form, mitochondrial	>sp|P08559|ODPA_HUMAN Pyruvate dehydrogenase E1 component subunit alpha, somatic form, mitochondrial OS=Homo sapiens GN=PDHA1 PE=1 SV=3;>sp|P08559-2|ODPA_HUMAN Isoform 2 of Pyruvate dehydrogenase E1 component subunit alpha, somatic form, mitochondrial OS=H	43.295	3.3461e-54	9		1.25591	0.0989575	0.00949314	2.02259	17.2	5	5	1.1373	77.416	6	6482000	3303600	3178400	11.8	5	5	1.2497	69.158	9	10968000	4892500	6075100	13.6	3	3	1.21485	80.144	4	2058000	1194800	863180	29.2	8	8	1.44088	73.078	9	16130000	9296800	6833300
	730	Q16875-3;Q5W015;Q16875-2;Q16875;Q5VX20;Q16875-4;F2Z2I2;H0Y483;F5H5L1;Q5XLC2;Q64EX5;B7Z5C3;Q66S35;Q16877;B4DI16;Q4VBA9;P16118-2;P16118;Q9H178;C9JJ23;C9JX77;C9K0D8	PFKFB3	6-phosphofructo-2-kinase/fructose-2,6-bisphosphatase 3;6-phosphofructo-2-kinase;Fructose-2,6-bisphosphatase	>sp|Q16875-3|F263_HUMAN Isoform 3 of 6-phosphofructo-2-kinase/fructose-2,6-bisphosphatase 3 OS=Homo sapiens GN=PFKFB3;>tr|Q5W015|Q5W015_HUMAN 6-phosphofructo-2-kinase OS=Homo sapiens GN=PFKFB3 PE=1 SV=1;>sp|Q16875-2|F263_HUMAN Isoform 2 of 6-phosphofructo-	57.287	1.3179e-118	22		1.25302	0.0979583	0.00813823	2.08947	31.6	15	13	1.1434	48.501	42	45444000	20160000	25284000	33.6	16	14	1.1647	58.577	43	59296000	27618000	31678000	38.8	19	16	1.37747	50.752	46	44930000	24976000	19954000	38.4	18	15	1.34382	46.14	45	66633000	37711000	28923000
	612	P62316;K7ERG4;P62316-2;K7EJB5	SNRPD2	Small nuclear ribonucleoprotein Sm D2	>sp|P62316|SMD2_HUMAN Small nuclear ribonucleoprotein Sm D2 OS=Homo sapiens GN=SNRPD2 PE=1 SV=1;>tr|K7ERG4|K7ERG4_HUMAN Small nuclear ribonucleoprotein Sm D2 OS=Homo sapiens GN=SNRPD2 PE=1 SV=1;>sp|P62316-2|SMD2_HUMAN Isoform 2 of Small nuclear ribonucleop	13.527	1.6852e-75	4		1.2465	0.0956915	0.00703655	2.15264	22	3	3	1.3371	106.76	3	5144800	2064100	3080700	23.7	3	3	1.3408	97.483	3	4814800	2079400	2735400	16.1	2	2	1.1737	6.1294	2	2777600	1406700	1370800	32.2	4	4	1.14732	83.247	4	5069400	2713200	2356200
	330	O60313-2;O60313;E5KLK1;E5KLJ9;E5KLJ5;E5KLJ6;H7C141;C9JY58;H7C3G2;H7C321	OPA1	Dynamin-like 120 kDa protein, mitochondrial;Dynamin-like 120 kDa protein, form S1	>sp|O60313-2|OPA1_HUMAN Isoform 2 of Dynamin-like 120 kDa protein, mitochondrial OS=Homo sapiens GN=OPA1;>sp|O60313|OPA1_HUMAN Dynamin-like 120 kDa protein, mitochondrial OS=Homo sapiens GN=OPA1 PE=1 SV=3;>tr|E5KLK1|E5KLK1_HUMAN Dynamin-like 120 kDa protei	115.88	9.2431e-148	10		1.24357	0.0946713	0.00960993	2.01728	18.9	16	16	1.1234	13.392	18	8219000	3773700	4445200	4.1	4	4	1.1631	20.286	4	806820	366980	439850	25.9	21	21	1.34617	25.498	23	8608600	4798200	3810300	29.7	24	24	1.35967	19.597	28	17464000	9684400	7780100
	374	O95881;V9GY50;V9GYV4	TXNDC12	Thioredoxin domain-containing protein 12	>sp|O95881|TXD12_HUMAN Thioredoxin domain-containing protein 12 OS=Homo sapiens GN=TXNDC12 PE=1 SV=1	19.206	7.1699e-70	3		1.23472	0.0915674	0.00537477	2.26964	48.3	8	8	1.2041	74.41	10	59029000	25578000	33452000	48.3	8	8	1.1349	72.951	12	63591000	29220000	34371000	52.3	8	8	1.33287	68.089	10	42649000	23594000	19055000	47.7	7	7	1.27603	50.744	19	66062000	36046000	30016000
	813	Q8IXB1;Q8IXB1-2;Q8IXB1-3;E7EP04;H7C1G0	DNAJC10	DnaJ homolog subfamily C member 10	>sp|Q8IXB1|DJC10_HUMAN DnaJ homolog subfamily C member 10 OS=Homo sapiens GN=DNAJC10 PE=1 SV=2;>sp|Q8IXB1-2|DJC10_HUMAN Isoform 2 of DnaJ homolog subfamily C member 10 OS=Homo sapiens GN=DNAJC10	91.079	1.2211e-254	5		1.23319	0.0910312	0.00345892	2.46106	20.4	16	16	1.1309	22.955	16	15335000	6764900	8570500	29.9	19	19	1.2415	28.681	23	20209000	8903400	11306000	20.1	15	15	1.29968	20.109	20	11951000	6836400	5114500	22.7	16	16	1.26741	35.837	20	25732000	13954000	11777000
	88	C9JNK6;O75431-2;O75431;C9JAZ1	MTX2	Metaxin-2	>tr|C9JNK6|C9JNK6_HUMAN Metaxin-2 OS=Homo sapiens GN=MTX2 PE=1 SV=1;>sp|O75431-2|MTX2_HUMAN Isoform 2 of Metaxin-2 OS=Homo sapiens GN=MTX2;>sp|O75431|MTX2_HUMAN Metaxin-2 OS=Homo sapiens GN=MTX2 PE=1 SV=1;>tr|C9JAZ1|C9JAZ1_HUMAN Metaxin-2 (Fragment) OS=Hom	23.643	1.7087e-84	4		1.23158	0.0904629	0.0371039	1.43058	40.6	6	6	1.1728	80.259	8	8275600	3753300	4522300	40.6	6	6	1.0536	80.349	8	8201000	3826600	4374400	40.6	6	6	1.5306	84.372	11	8574500	5021700	3552800	40.6	6	6	1.21644	68.52	8	8338100	4442300	3895800
	435	P10515;E9PEJ4;H0YDD4;F5H7M3	DLAT	Dihydrolipoyllysine-residue acetyltransferase component of pyruvate dehydrogenase complex, mitochondrial	>sp|P10515|ODP2_HUMAN Dihydrolipoyllysine-residue acetyltransferase component of pyruvate dehydrogenase complex, mitochondrial OS=Homo sapiens GN=DLAT PE=1 SV=3;>tr|E9PEJ4|E9PEJ4_HUMAN Acetyltransferase component of pyruvate dehydrogenase complex OS=Homo s	68.996	2.0558e-170	4		1.22035	0.0864842	0.0404669	1.3929	31.7	17	17	1.0623	30.943	53	89695000	41916000	47778000	31.7	18	18	1.0607	33.073	61	159750000	76147000	83608000	30.4	17	17	1.44995	43.546	50	52764000	30092000	22672000	31.7	18	18	1.35752	46.388	59	130990000	72911000	58084000
	258	I3L3P7;P62244;I3L246;H3BN98;H3BV27;H3BT37;I3L303;H3BVC7	RPS15A	40S ribosomal protein S15a	>tr|I3L3P7|I3L3P7_HUMAN 40S ribosomal protein S15a OS=Homo sapiens GN=RPS15A PE=1 SV=1;>sp|P62244|RS15A_HUMAN 40S ribosomal protein S15a OS=Homo sapiens GN=RPS15A PE=1 SV=2;>tr|I3L246|I3L246_HUMAN 40S ribosomal protein S15a OS=Homo sapiens GN=RPS15A PE=4 S	11.477	9.4521e-18	8		1.21561	0.0847929	0.0404501	1.39308	8	1	1	1.0141	NaN	1	1670200	805330	864820	27	3	3	1.1234	89.779	3	3847000	1754300	2092600	32	3	3	1.3762	58.641	3	2773900	1573500	1200400	41	4	4	1.39276	69.654	5	8287700	4511300	3776400
	954	Q9HAV7	GRPEL1	GrpE protein homolog 1, mitochondrial	>sp|Q9HAV7|GRPE1_HUMAN GrpE protein homolog 1, mitochondrial OS=Homo sapiens GN=GRPEL1 PE=1 SV=2	24.279	3.0538e-169	1		1.21098	0.0831361	0.0453545	1.34338	43.3	8	8	1.0816	44.006	10	23406000	10804000	12602000	44.2	8	8	1.0459	61.41	14	25836000	12267000	13569000	40.6	8	8	1.42223	85.589	12	14444000	8300900	6143300	53.5	12	12	1.33665	84.072	17	38504000	22173000	16331000
	152	Q16637-3;Q16637;E7EQZ4;Q16637-4;Q16637-2;B4DP61;H0YBZ9	SMN1;SMN2	Survival motor neuron protein	>sp|Q16637-3|SMN_HUMAN Isoform SMN-delta7 of Survival motor neuron protein OS=Homo sapiens GN=SMN1;>sp|Q16637|SMN_HUMAN Survival motor neuron protein OS=Homo sapiens GN=SMN1 PE=1 SV=1;>tr|E7EQZ4|E7EQZ4_HUMAN Survival motor neuron protein OS=Homo sapiens GN	30.45	3.2102e-153	7		1.20366	0.0805044	0.00546877	2.26211	44.3	9	9	1.1566	30.218	30	44968000	21022000	23946000	40.4	10	10	1.1533	29.665	15	63068000	28509000	34559000	40.1	8	8	1.31151	33.778	37	33212000	17992000	15220000	44.3	10	10	1.19983	40.132	36	54125000	29775000	24351000
	372	O95793-2;O95793;Q5JW30;O95793-3;Q5JW28;F6UDC6	STAU1	Double-stranded RNA-binding protein Staufen homolog 1	>sp|O95793-2|STAU1_HUMAN Isoform Short of Double-stranded RNA-binding protein Staufen homolog 1 OS=Homo sapiens GN=STAU1;>sp|O95793|STAU1_HUMAN Double-stranded RNA-binding protein Staufen homolog 1 OS=Homo sapiens GN=STAU1 PE=1 SV=2;>tr|Q5JW30|Q5JW30_HUMAN	54.933	2.3579e-55	6		1.2033	0.0803742	0.0102721	1.98834	21.8	9	9	1.1058	17.451	9	5458500	2559000	2899500	24	11	11	1.136	19.748	12	7889000	3679900	4209100	19.4	9	9	1.30166	18.617	8	3295300	1820500	1474800	15.9	6	6	1.28217	11.282	7	5058700	2960000	2098700
	186	O94915;F5GX82;F2Z2S2;H0Y9X0;D6RJI4;D6R9B9;Q5TBA9	FRYL	Protein furry homolog-like	>sp|O94915|FRYL_HUMAN Protein furry homolog-like OS=Homo sapiens GN=FRYL PE=1 SV=2;>tr|F5GX82|F5GX82_HUMAN Protein furry homolog-like OS=Homo sapiens GN=FRYL PE=1 SV=1;>tr|F2Z2S2|F2Z2S2_HUMAN Protein furry homolog-like OS=Homo sapiens GN=FRYL PE=1 SV=1	339.59	0	7		1.20129	0.0796488	0.0102721	1.98834	41	103	89	1.0996	19.876	167	207500000	95329000	112170000	30.6	75	63	1.14	21.683	71	144190000	64656000	79531000	32.2	83	71	1.30205	22.1	139	114250000	63669000	50581000	34.5	83	70	1.27593	17.753	140	213090000	118240000	94853000
	1038	Q9Y512;A8MZI2	SAMM50	Sorting and assembly machinery component 50 homolog	>sp|Q9Y512|SAM50_HUMAN Sorting and assembly machinery component 50 homolog OS=Homo sapiens GN=SAMM50 PE=1 SV=3;>tr|A8MZI2|A8MZI2_HUMAN Sorting and assembly machinery component 50 homolog OS=Homo sapiens GN=SAMM50 PE=1 SV=2	51.976	2.3028e-58	2		1.20101	0.0795458	0.0435071	1.36144	32.2	12	12	1.0794	58.611	20	20703000	9548500	11154000	24.9	10	10	1.0419	46.558	20	20831000	9695700	11135000	30.9	12	12	1.37204	56.665	17	13847000	7712300	6134500	34.1	12	12	1.34836	73.225	16	28127000	15075000	13052000
	849	Q8WWY3;E7EVX8;E7ESA8;Q8WWY3-3;Q8WWY3-2;E7EU94;E7ESX0;E7EN72	PRPF31	U4/U6 small nuclear ribonucleoprotein Prp31	>sp|Q8WWY3|PRP31_HUMAN U4/U6 small nuclear ribonucleoprotein Prp31 OS=Homo sapiens GN=PRPF31 PE=1 SV=2;>tr|E7EVX8|E7EVX8_HUMAN U4/U6 small nuclear ribonucleoprotein Prp31 OS=Homo sapiens GN=PRPF31 PE=1 SV=1;>tr|E7ESA8|E7ESA8_HUMAN U4/U6 small nuclear ribon	55.455	2.1232e-219	8		1.20011	0.0792218	0.0435071	1.36144	43.7	17	17	1.0393	18.215	30	33233000	15403000	17830000	41.1	16	16	1.0828	16.622	23	22933000	10793000	12140000	41.5	15	15	1.36698	38.122	21	17987000	10316000	7670600	42.5	17	17	1.34845	16.465	25	42900000	23922000	18978000
	533	P39019;M0R2L9;M0QXK4;M0QYF7;M0R140	RPS19	40S ribosomal protein S19	>sp|P39019|RS19_HUMAN 40S ribosomal protein S19 OS=Homo sapiens GN=RPS19 PE=1 SV=2;>tr|M0R2L9|M0R2L9_HUMAN 40S ribosomal protein S19 (Fragment) OS=Homo sapiens GN=RPS19 PE=1 SV=1;>tr|M0QXK4|M0QXK4_HUMAN 40S ribosomal protein S19 (Fragment) OS=Homo sapiens	16.06	1.2961e-12	5		1.19479	0.0772904	0.031684	1.49916	0	0	0			0	0	0	0	26.9	5	5	1.1053	90.676	5	5478500	2587100	2891500	12.4	2	2	1.20747	14.02	2	2761100	1551000	1210100	12.4	2	2	1.27796	104.82	2	3878600	2127600	1751100
	90	Q9NX63;C9JRZ6;F8WAR4;G3V1K1;F8WD73	CHCHD3	Coiled-coil-helix-coiled-coil-helix domain-containing protein 3, mitochondrial	>sp|Q9NX63|CHCH3_HUMAN Coiled-coil-helix-coiled-coil-helix domain-containing protein 3, mitochondrial OS=Homo sapiens GN=CHCHD3 PE=1 SV=1;>tr|C9JRZ6|C9JRZ6_HUMAN Coiled-coil-helix-coiled-coil-helix domain-containing protein 3, mitochondrial OS=Homo sapiens	26.152	3.9022e-208	5		1.18927	0.0752811	0.0361668	1.44169	45.8	13	13	1.1154	20.509	23	25199000	11680000	13519000	41.9	13	13	1.0299	28.772	21	30162000	14705000	15457000	41	10	10	1.29616	35.927	17	16378000	9244300	7133900	48	13	13	1.34351	54.994	27	49567000	26627000	22940000
	37	B4DJP7;P62318;H3BT13	SNRPD3	Small nuclear ribonucleoprotein Sm D3	>tr|B4DJP7|B4DJP7_HUMAN Small nuclear ribonucleoprotein Sm D3 OS=Homo sapiens GN=SNRPD3 PE=1 SV=1;>sp|P62318|SMD3_HUMAN Small nuclear ribonucleoprotein Sm D3 OS=Homo sapiens GN=SNRPD3 PE=1 SV=1	13.291	1.7977e-73	3		1.1865	0.0742661	0.00543488	2.26481	25.8	2	2	1.2366	4.7357	2	4025700	1838600	2187000	33.3	3	3	1.1615	99.422	4	17466000	7579800	9886400	25.8	2	2	1.26056	11.777	2	2944300	1555200	1389100	15.8	2	2	1.09459	105.74	2	10595000	5393700	5201000
	53	B4DTG6;Q8ND56-2;Q8ND56;K7EMZ9;I3L4Q1	LSM14A	Protein LSM14 homolog A	>tr|B4DTG6|B4DTG6_HUMAN Protein LSM14 homolog A OS=Homo sapiens GN=LSM14A PE=1 SV=1;>sp|Q8ND56-2|LS14A_HUMAN Isoform 2 of Protein LSM14 homolog A OS=Homo sapiens GN=LSM14A;>sp|Q8ND56|LS14A_HUMAN Protein LSM14 homolog A OS=Homo sapiens GN=LSM14A PE=1 SV=3;>	46.411	8.0563e-157	5		1.16671	0.0669646	0.0423419	1.37323	23.7	11	11	1.1196	21.493	22	16358000	7486000	8871800	20.4	9	9	0.9934	69.237	19	11735000	4771800	6962700	24.2	10	10	1.28999	42.404	23	14649000	7802500	6846200	21.8	10	10	1.29147	29.409	25	21648000	11996000	9651400
	771	Q6PKG0;Q6PKG0-3;E5RH50;H0YC73;H0YBW1;Q659C4-7;Q659C4-6;Q659C4-5;Q659C4-2;Q659C4;Q659C4-9;H0YAN4;H0YC33	LARP1	La-related protein 1	>sp|Q6PKG0|LARP1_HUMAN La-related protein 1 OS=Homo sapiens GN=LARP1 PE=1 SV=2;>sp|Q6PKG0-3|LARP1_HUMAN Isoform 2 of La-related protein 1 OS=Homo sapiens GN=LARP1	123.51	5.4541e-101	13		1.1569	0.0632953	0.0371878	1.4296	6.3	6	6	1.0756	30.091	11	2937600	1453600	1484000	7.9	6	6	1.0538	19.608	6	4585100	2247400	2337700	4.5	4	4	1.32238	102.22	5	2152100	1057600	1094500	9.2	8	8	1.19513	48.197	12	5966600	3190400	2776200
	30	J3QLE5;P14678-2;P63162;P14678;B3KVR1;P14678-3;J3KRY3;S4R3P3	SNRPN;SNRPB	Small nuclear ribonucleoprotein-associated protein N;Small nuclear ribonucleoprotein-associated proteins B and B;Small nuclear ribonucleoprotein-associated protein	>tr|J3QLE5|J3QLE5_HUMAN Small nuclear ribonucleoprotein-associated protein N (Fragment) OS=Homo sapiens GN=SNRPN PE=4 SV=1;>sp|P14678-2|RSMB_HUMAN Isoform SM-B of Small nuclear ribonucleoprotein-associated proteins B and B OS=Homo sapiens GN=SNRPB;>sp|P63	17.546	3.4889e-08	8		1.14743	0.0597274	0.0293555	1.53231	9.5	3	3	1.2715	116.43	3	8278900	3456300	4822600	8.9	2	2	1.1999	113.75	2	6759900	3096300	3663600	13.6	3	3	1.05474	39.839	3	5088100	2575700	2512400	13.6	3	3	1.07721	34.786	3	8014500	4293900	3720600
	76	P43307-2;F5H5Y2;C9J3L8;C9J5W0;P43307;E9PAL7;C9IZQ1	SSR1	Translocon-associated protein subunit alpha	>sp|P43307-2|SSRA_HUMAN Isoform 2 of Translocon-associated protein subunit alpha OS=Homo sapiens GN=SSR1;>tr|F5H5Y2|F5H5Y2_HUMAN Translocon-associated protein subunit alpha OS=Homo sapiens GN=SSR1 PE=1 SV=1;>tr|C9J3L8|C9J3L8_HUMAN Translocon-associated pro	29.373	5.1528e-29	7		1.14687	0.0595152	0.0160598	1.79426	5.8	1	1	1.2281	NaN	1	481240	217380	263860	5.8	1	1	1.0516	NaN	1	1142600	523220	619400	8.9	2	2	1.12256	93.456	2	1341100	669390	671720	8.9	2	2	1.19335	55.313	2	1860000	995200	864810
	250	H7C5E4;Q8IZH2-2;Q8IZH2	XRN1	5-3 exoribonuclease 1	>tr|H7C5E4|H7C5E4_HUMAN 5-3 exoribonuclease 1 (Fragment) OS=Homo sapiens GN=XRN1 PE=1 SV=1;>sp|Q8IZH2-2|XRN1_HUMAN Isoform 2 of 5-3 exoribonuclease 1 OS=Homo sapiens GN=XRN1;>sp|Q8IZH2|XRN1_HUMAN 5-3 exoribonuclease 1 OS=Homo sapiens GN=XRN1 PE=1 SV=	130.08	3.1644e-07	3		1.14552	0.0590038	0.0175493	1.75574	3.1	3	3	1.1469	52.573	3	5577800	372050	5205700	0	0	0			0	0	0	0	2.8	3	3	1.09236	10.4	3	567920	288890	279040	2	2	2	1.19983	13.23	2	378220	192170	186050
	593	P60866;P60866-2;E5RJX2;E5RIP1;G3XAN0	RPS20	40S ribosomal protein S20	>sp|P60866|RS20_HUMAN 40S ribosomal protein S20 OS=Homo sapiens GN=RPS20 PE=1 SV=1;>sp|P60866-2|RS20_HUMAN Isoform 2 of 40S ribosomal protein S20 OS=Homo sapiens GN=RPS20;>tr|E5RJX2|E5RJX2_HUMAN 40S ribosomal protein S20 OS=Homo sapiens GN=RPS20 PE=1 SV=1	13.373	5.3694e-16	5		1.1285	0.0525011	0.0438531	1.358	9.2	1	1	1.1854	29.326	2	1584400	672050	912340	25.2	3	3	0.97426	91.581	5	7703700	3886900	3816800	25.2	3	3	1.18389	7.8372	5	3575800	1823900	1752000	19.3	2	2	1.18618	87.776	4	6553200	3583200	2970000
	815	Q8IXI2-4;Q8IXI2;Q8IXI2-5;Q8IXI2-2;Q8IXI2-7;Q8IXI2-3;H7BXZ6;J3KSX7;Q8IXI2-6;K7EIQ7;J3KSR5;J3QLG2;K7EP86	RHOT1	Mitochondrial Rho GTPase 1;Mitochondrial Rho GTPase	>sp|Q8IXI2-4|MIRO1_HUMAN Isoform 4 of Mitochondrial Rho GTPase 1 OS=Homo sapiens GN=RHOT1;>sp|Q8IXI2|MIRO1_HUMAN Mitochondrial Rho GTPase 1 OS=Homo sapiens GN=RHOT1 PE=1 SV=2;>sp|Q8IXI2-5|MIRO1_HUMAN Isoform 5 of Mitochondrial Rho GTPase 1 OS=Homo sapiens	66.54	5.8958e-32	13		1.10486	0.0433073	0.0354977	1.4498	8.1	5	4	1.106	26.902	5	3144600	1486700	1658000	8.1	5	4	1.0009	15.881	6	5117600	2674700	2442900	9.1	5	4	1.15774	27.969	6	2380900	1245400	1135600	13.3	7	6	1.16271	33.909	6	6201000	3481600	2719300
	697	Q14008;Q14008-3;Q14008-2;E9PQH5;H0YDX5;H0YCF6;H0YEK7	CKAP5	Cytoskeleton-associated protein 5	>sp|Q14008|CKAP5_HUMAN Cytoskeleton-associated protein 5 OS=Homo sapiens GN=CKAP5 PE=1 SV=3;>sp|Q14008-3|CKAP5_HUMAN Isoform 3 of Cytoskeleton-associated protein 5 OS=Homo sapiens GN=CKAP5;>sp|Q14008-2|CKAP5_HUMAN Isoform 2 of Cytoskeleton-associated prote	225.49	0	7		1.09677	0.0401144	0.0202596	1.69337	43.6	77	77	1.0573	20.945	105	118180000	56652000	61528000	34	58	58	1.047	25.246	85	101870000	51735000	50134000	37.8	69	69	1.14151	23.214	99	74534000	39823000	34711000	40.1	75	75	1.14507	29.024	119	136250000	70742000	65511000
	841	Q8TDY2-2;Q8TDY2;H0YC28;H0YC30	RB1CC1	RB1-inducible coiled-coil protein 1	>sp|Q8TDY2-2|RBCC1_HUMAN Isoform 2 of RB1-inducible coiled-coil protein 1 OS=Homo sapiens GN=RB1CC1;>sp|Q8TDY2|RBCC1_HUMAN RB1-inducible coiled-coil protein 1 OS=Homo sapiens GN=RB1CC1 PE=1 SV=3	182.85	2.8177e-136	4		1.06819	0.0286475	0.0242834	1.61469	13.7	18	18	1.0255	53.998	22	13695000	4662800	9031700	6.7	9	9	1.0427	29.324	8	5259600	2299200	2960400	9.3	12	12	1.12748	23.066	19	4811900	2595400	2216500	15.1	21	21	1.0799	22.051	25	13977000	7255100	6722100
	1019	Q9Y277;Q9Y277-2;F5H740;E5RJN6;E5RHZ6;E5RFP6;E5RHE1;E5RK27;E5RFL1	VDAC3	Voltage-dependent anion-selective channel protein 3	>sp|Q9Y277|VDAC3_HUMAN Voltage-dependent anion-selective channel protein 3 OS=Homo sapiens GN=VDAC3 PE=1 SV=1;>sp|Q9Y277-2|VDAC3_HUMAN Isoform 2 of Voltage-dependent anion-selective channel protein 3 OS=Homo sapiens GN=VDAC3;>tr|F5H740|F5H740_HUMAN Voltage	30.658	0	9		1.14614	0.0592388	0.0508276	1.2939	49.1	10	10	1.051	43.622	15	27343000	13076000	14267000	42	9	9	1.0342	35.464	13	23401000	11525000	11876000	46.3	9	9	1.27016	44.613	14	16231000	9038500	7192100	46.3	9	9	1.24994	64.014	17	27236000	14679000	12557000
	370	O95425-2;O95425-4;O95425-3;O95425;F5GXV0;F5H2Q5	SVIL	Supervillin	>sp|O95425-2|SVIL_HUMAN Isoform 2 of Supervillin OS=Homo sapiens GN=SVIL;>sp|O95425-4|SVIL_HUMAN Isoform SV4 of Supervillin OS=Homo sapiens GN=SVIL;>sp|O95425-3|SVIL_HUMAN Isoform SV3 of Supervillin OS=Homo sapiens GN=SVIL;>sp|O95425|SVIL_HUMAN Supervillin	200.84	1.3453e-06	6		1.53709	0.186701	0.0519996	1.284	1.3	2	2	1.1971	3.1173	2	788870	386250	402620	0.4	1	1	2.0232	NaN	1	556210	177540	378660	0	0	0			0	0	0	0	1.3	2	2	1.49945	26.233	2	950300	727780	222510
	359	O94915-2			>sp|O94915-2|FRYL_HUMAN Isoform 2 of Protein furry homolog-like OS=Homo sapiens GN=FRYL	45.597	7.1613e-275	1		1.31566	0.119145	0.052383	1.28081	37.7	15	1	1.0596	48.618	3	4782900	2342200	2440800	37.2	13	1	1.0779	NaN	1	2800600	1319400	1481200	36	13	1	1.67386	1.887	2	3028700	1888800	1139900	42.9	14	1	1.56725	41.44	3	5838000	3318800	2519300
	690	Q13472-3;Q13472-2;Q13472;B4DSJ0	TOP3A	DNA topoisomerase 3-alpha	>sp|Q13472-3|TOP3A_HUMAN Isoform 3 of DNA topoisomerase 3-alpha OS=Homo sapiens GN=TOP3A;>sp|Q13472-2|TOP3A_HUMAN Isoform Short of DNA topoisomerase 3-alpha OS=Homo sapiens GN=TOP3A;>sp|Q13472|TOP3A_HUMAN DNA topoisomerase 3-alpha OS=Homo sapiens GN=TOP3A	101.21	2.7367e-06	4		3.3874	0.529866	0.0535414	1.27131	1	1	1	4.2062	NaN	1	146830	24781	122050	1.2	1	1			0	110440	0	110440	3.1	2	2	2.72799	17.71	2	176710	154640	22069	0	0	0			0	0	0	0
	338	O75251;F5H5N1;B3KRI2;F5GXJ1	NDUFS7	NADH dehydrogenase [ubiquinone] iron-sulfur protein 7, mitochondrial	>sp|O75251|NDUS7_HUMAN NADH dehydrogenase [ubiquinone] iron-sulfur protein 7, mitochondrial OS=Homo sapiens GN=NDUFS7 PE=1 SV=3;>tr|F5H5N1|F5H5N1_HUMAN NADH dehydrogenase [ubiquinone] iron-sulfur protein 7, mitochondrial OS=Homo sapiens GN=NDUFS7 PE=1 SV=1	23.563	1.7677e-27	4		2.02616	0.306674	0.0540319	1.26735	10.8	2	2	1.3003	74.294	2	4819000	1948900	2870100	14.6	4	4	1.2779	131.07	4	3215700	1279900	1935800	9.9	2	2	4.80584	178.5	2	1363500	1091400	272080	14.1	3	3	2.11051	51.969	7	6648800	4589700	2059100
	884	Q96HS1;Q96HS1-2;F5GXG4	PGAM5	Serine/threonine-protein phosphatase PGAM5, mitochondrial	>sp|Q96HS1|PGAM5_HUMAN Serine/threonine-protein phosphatase PGAM5, mitochondrial OS=Homo sapiens GN=PGAM5 PE=1 SV=2;>sp|Q96HS1-2|PGAM5_HUMAN Isoform 2 of Serine/threonine-protein phosphatase PGAM5, mitochondrial OS=Homo sapiens GN=PGAM5	32.004	1.4742e-111	3		1.2825	0.108056	0.0551417	1.25852	39.8	11	11	1.065	76.802	36	39742000	19192000	20550000	55.4	14	14	1.047	110.32	31	45851000	22340000	23511000	61.2	17	17	1.51932	92.798	33	32312000	19628000	12684000	56.7	14	14	1.59691	74.662	34	51360000	30835000	20525000
	955	Q9HB66	MKKS		>tr|Q9HB66|Q9HB66_HUMAN Alternative protein MKKS OS=Homo sapiens GN=MKKS PE=2 SV=1	7.2634	3.7717e-11	1		5.73052	0.758194	0.056321	1.24933	0	0	0			0	0	0	0	27	1	1	4.1991	NaN	1	1061900	111280	950640	0	0	0			0	0	0	0	27	1	1	7.82044	NaN	1	1124100	1016300	107840
	214	F8WAH1;Q9UDR5;F8WE53	AASS	Alpha-aminoadipic semialdehyde synthase, mitochondrial;Lysine ketoglutarate reductase;Saccharopine dehydrogenase	>tr|F8WAH1|F8WAH1_HUMAN Lysine ketoglutarate reductase OS=Homo sapiens GN=AASS PE=1 SV=1;>sp|Q9UDR5|AASS_HUMAN Alpha-aminoadipic semialdehyde synthase, mitochondrial OS=Homo sapiens GN=AASS PE=1 SV=1;>tr|F8WE53|F8WE53_HUMAN Lysine ketoglutarate reductase O	81.037	2.2139e-12	3		1.92884	0.285295	0.0563235	1.24931	2.5	1	1	2.3301	NaN	1	58157	20796	37361	2.5	1	1	2.3632	NaN	1	115310	40168	75145	3.6	2	2	0.818599	162.88	2	955500	199600	755900	2.3	2	2	3.07069	5.1529	2	521170	386400	134770
	293	M0QXU7;O43615	TIMM44	Mitochondrial import inner membrane translocase subunit TIM44	>tr|M0QXU7|M0QXU7_HUMAN Mitochondrial import inner membrane translocase subunit TIM44 (Fragment) OS=Homo sapiens GN=TIMM44 PE=1 SV=1;>sp|O43615|TIM44_HUMAN Mitochondrial import inner membrane translocase subunit TIM44 OS=Homo sapiens GN=TIMM44 PE=1 SV=2	31.16	7.6918e-05	2		3.87315	0.588064	0.0565301	1.24772	0	0	0			0	0	0	0	0	0	0			0	0	0	0	9.9	2	2	4.93437	37.666	2	554630	444480	110150	4	1	1	3.04016	NaN	1	465130	347610	117520
	606	P62266;D6RD47;D6RDJ2;D6RIX0;D6R9I7	RPS23	40S ribosomal protein S23	>sp|P62266|RS23_HUMAN 40S ribosomal protein S23 OS=Homo sapiens GN=RPS23 PE=1 SV=3;>tr|D6RD47|D6RD47_HUMAN 40S ribosomal protein S23 OS=Homo sapiens GN=RPS23 PE=1 SV=1	15.807	1.0092e-10	5		1.17182	0.0688606	0.0574738	1.24053	16.1	2	2	0.98375	49.7	2	2716100	1274400	1441600	22.4	3	3	1.1222	117.01	4	3152700	1530200	1622500	7.7	1	1	1.25584	NaN	1	1413800	802730	611060	7.7	1	1	1.36004	45.675	2	2820100	1728500	1091700
	784	Q71RC2-5;Q71RC2-3;Q71RC2;Q71RC2-4;Q96J85;Q71RC2-7;X6RLN4;Q71RC2-2;Q71RC2-6;F8W1I4;F8VY40	LARP4	La-related protein 4	>sp|Q71RC2-5|LARP4_HUMAN Isoform 5 of La-related protein 4 OS=Homo sapiens GN=LARP4;>sp|Q71RC2-3|LARP4_HUMAN Isoform 3 of La-related protein 4 OS=Homo sapiens GN=LARP4;>sp|Q71RC2|LARP4_HUMAN La-related protein 4 OS=Homo sapiens GN=LARP4 PE=1 SV=3;>sp|Q71RC	72.399	3.5312e-11	11		1.30952	0.117112	0.0577856	1.23818	2	1	1	0.93049	NaN	1	131180	78965	52212	2	1	1	1.3806	NaN	1	166050	77960	88087	4.4	2	2	1.67766	20.225	3	445950	263620	182320	3.8	2	2	1.36448	15.979	3	439910	226410	213500
	749	Q5T440;G5EA38	IBA57	Putative transferase CAF17, mitochondrial	>sp|Q5T440|CAF17_HUMAN Putative transferase CAF17, mitochondrial OS=Homo sapiens GN=IBA57 PE=1 SV=1;>tr|G5EA38|G5EA38_HUMAN Chromosome 1 open reading frame 69 OS=Homo sapiens GN=IBA57 PE=1 SV=1	38.155	1.4467e-37	2		1.29975	0.11386	0.0599405	1.22228	14.9	4	4	1.1305	100.81	7	4897500	2809500	2088000	14.9	4	4	0.99	74.489	5	4656200	2109400	2546800	14.6	4	4	1.54359	55.186	4	2792700	1727400	1065300	17.7	5	5	1.65196	50.197	8	5069300	3149400	1919800
	340	O75342	ALOX12B	Arachidonate 12-lipoxygenase, 12R-type	>sp|O75342|LX12B_HUMAN Arachidonate 12-lipoxygenase, 12R-type OS=Homo sapiens GN=ALOX12B PE=1 SV=1	80.355	8.4335e-08	1		7.77934	0.890943	0.0600772	1.22129	1.4	1	1			0	449100	449100	0	1.7	1	1			0	262550	262550	0	1.4	1	1	11.4821	NaN	1	343640	324590	19044	4.3	3	3	5.27065	NaN	1	814580	762760	51817
	684	Q13263-2;Q13263;M0R0K9;M0R3C0	TRIM28	Transcription intermediary factor 1-beta	>sp|Q13263-2|TIF1B_HUMAN Isoform 2 of Transcription intermediary factor 1-beta OS=Homo sapiens GN=TRIM28;>sp|Q13263|TIF1B_HUMAN Transcription intermediary factor 1-beta OS=Homo sapiens GN=TRIM28 PE=1 SV=5;>tr|M0R0K9|M0R0K9_HUMAN Transcription intermediary	79.473	5.5513e-24	4		2.33509	0.368304	0.0613762	1.212	2.9	2	2	2.3399	126.94	2	672040	185330	486720	2.9	2	2	7.0866	74.679	7	8561400	1184400	7377000	5.4	3	3	1.52272	12.397	3	854880	523700	331180	5.4	3	3	1.1775	25.401	3	1442700	782230	660430
	294	M0R0F0;P46782;M0QZN2;M0R0R2	RPS5	40S ribosomal protein S5;40S ribosomal protein S5, N-terminally processed	>tr|M0R0F0|M0R0F0_HUMAN 40S ribosomal protein S5 (Fragment) OS=Homo sapiens GN=RPS5 PE=1 SV=1;>sp|P46782|RS5_HUMAN 40S ribosomal protein S5 OS=Homo sapiens GN=RPS5 PE=1 SV=4;>tr|M0QZN2|M0QZN2_HUMAN 40S ribosomal protein S5 OS=Homo sapiens GN=RPS5 PE=1 SV=1	22.391	1.1268e-50	4		1.12782	0.0522393	0.0613889	1.21191	17.5	2	2	1.0569	13.331	2	6558800	3474000	3084700	22.5	3	3	1.0743	105.2	3	9737400	4710700	5026600	22.5	3	3	1.31693	155.53	4	7647700	3884200	3763500	22.5	3	3	1.08202	136.34	3	5242200	2699900	2542300
	609	P62280;M0QZC5;M0R1H5;M0R1H6	RPS11	40S ribosomal protein S11	>sp|P62280|RS11_HUMAN 40S ribosomal protein S11 OS=Homo sapiens GN=RPS11 PE=1 SV=3;>tr|M0QZC5|M0QZC5_HUMAN 40S ribosomal protein S11 OS=Homo sapiens GN=RPS11 PE=1 SV=1;>tr|M0R1H5|M0R1H5_HUMAN 40S ribosomal protein S11 OS=Homo sapiens GN=RPS11 PE=1 SV=1	18.431	1.6656e-41	4		1.17704	0.0707909	0.0626542	1.20305	38	5	5	1.158	130.4	5	4690200	2070200	2620000	38	5	5	1.0555	112.85	5	4239300	2142500	2096800	42.4	6	6	1.08317	117.93	6	5579000	2765900	2813100	29.7	4	4	1.44978	90.161	7	5914500	3261700	2652800
	824	Q8N3Z3-2;Q8N3Z3;C9J0K3;C9J8V5;Q8N3Z3-3;F8WBY6	GTPBP8	GTP-binding protein 8	>sp|Q8N3Z3-2|GTPB8_HUMAN Isoform 2 of GTP-binding protein 8 OS=Homo sapiens GN=GTPBP8;>sp|Q8N3Z3|GTPB8_HUMAN GTP-binding protein 8 OS=Homo sapiens GN=GTPBP8 PE=2 SV=1;>tr|C9J0K3|C9J0K3_HUMAN GTP-binding protein 8 OS=Homo sapiens GN=GTPBP8 PE=4 SV=1;>tr|C9J	28.604	6.3181e-15	6		8.58159	0.933568	0.065447	1.18411	18.7	3	3	5.4338	NaN	1	1234600	128720	1105800	0	0	0			0	0	0	0	18.3	3	3	13.5529	NaN	1	460390	434690	25709	5.2	1	1			0	147800	147800	0
	89	H7C0U0;F8WCQ4;C9JNP8;Q9H300-2;Q9H300	PARL	Presenilins-associated rhomboid-like protein, mitochondrial;P-beta	>tr|H7C0U0|H7C0U0_HUMAN P-beta (Fragment) OS=Homo sapiens GN=PARL PE=4 SV=1;>tr|F8WCQ4|F8WCQ4_HUMAN P-beta OS=Homo sapiens GN=PARL PE=4 SV=1;>tr|C9JNP8|C9JNP8_HUMAN P-beta OS=Homo sapiens GN=PARL PE=4 SV=1;>sp|Q9H300-2|PARL_HUMAN Isoform 2 of Presenilins-a	17.608	0.00029071	5		1.61472	0.208096	0.0656584	1.18271	0	0	0			0	0	0	0	8.2	1	1	1.1036	NaN	1	124740	59524	65217	8.2	1	1	1.95152	NaN	1	86560	61914	24646	8.2	1	1	1.9548	NaN	1	147820	103920	43900
	318	O43181;D6REP1;D6R916;H0Y9M8;D6RI09	NDUFS4	NADH dehydrogenase [ubiquinone] iron-sulfur protein 4, mitochondrial	>sp|O43181|NDUS4_HUMAN NADH dehydrogenase [ubiquinone] iron-sulfur protein 4, mitochondrial OS=Homo sapiens GN=NDUFS4 PE=1 SV=1	20.108	7.3109e-09	5		2.37887	0.37637	0.0664768	1.17733	5.7	1	1	4.6847	NaN	1	1462000	219180	1242800	0	0	0			0	0	0	0	14.9	2	2	1.92308	27.768	2	1101400	745300	356060	8.6	1	1	1.49428	NaN	1	861440	486650	374790
	1016	Q9UPY3-2;Q9UPY3;Q9UPY3-3;H0YJZ6	DICER1	Endoribonuclease Dicer	>sp|Q9UPY3-2|DICER_HUMAN Isoform 2 of Endoribonuclease Dicer OS=Homo sapiens GN=DICER1;>sp|Q9UPY3|DICER_HUMAN Endoribonuclease Dicer OS=Homo sapiens GN=DICER1 PE=1 SV=3	208.45	8.829e-26	4		1.21656	0.0851353	0.0694768	1.15816	4.4	6	6	1.049	17.663	5	1286800	613520	673280	0	0	0			0	0	0	0	4.2	6	6	1.38383	28.866	5	833330	489800	343530	1.3	2	2	1.24036	2.834	2	519320	252030	267290
	883	Q96GW9	MARS2	Methionine--tRNA ligase, mitochondrial	>sp|Q96GW9|SYMM_HUMAN Methionine--tRNA ligase, mitochondrial OS=Homo sapiens GN=MARS2 PE=1 SV=2	66.59	2.4224e-19	1		1.44753	0.160627	0.0698393	1.1559	4.6	2	2	1.3901	NaN	1	134000	54558	79444	2.7	1	1	1.4066	NaN	1	98919	30775	68144	4.6	2	2	2.33476	15.435	2	191810	131740	60067	2.9	1	1	0.961723	NaN	1	163810	112320	51491
	897	Q99595	TIMM17A	Mitochondrial import inner membrane translocase subunit Tim17-A	>sp|Q99595|TI17A_HUMAN Mitochondrial import inner membrane translocase subunit Tim17-A OS=Homo sapiens GN=TIMM17A PE=1 SV=1	18.023	2.6807e-05	1		2.16233	0.334921	0.0701068	1.15424	12.9	1	1	2.5578	NaN	1	268390	70067	198320	12.9	1	1	1.828	NaN	1	350920	136670	214250	12.9	1	1			0	127290	127290	0	0	0	0			0	0	0	0
	373	O95831-3;O95831;O95831-6;O95831-4;O95831-2;O95831-5;E9PMA0	AIFM1	Apoptosis-inducing factor 1, mitochondrial	>sp|O95831-3|AIFM1_HUMAN Isoform 3 of Apoptosis-inducing factor 1, mitochondrial OS=Homo sapiens GN=AIFM1;>sp|O95831|AIFM1_HUMAN Apoptosis-inducing factor 1, mitochondrial OS=Homo sapiens GN=AIFM1 PE=1 SV=1;>sp|O95831-6|AIFM1_HUMAN Isoform 6 of Apoptosis-i	66.294	1.7052e-128	7		1.26988	0.103763	0.074225	1.12945	13.8	6	6	1.0848	11.317	6	3788200	1761100	2027200	19.9	9	9	0.9865	13.862	9	10060000	4638500	5421500	18.1	10	10	1.44762	28.862	10	4678500	2753300	1925300	12.5	6	6	1.67861	15.797	6	6790500	4095300	2695200
	494	P25398	RPS12	40S ribosomal protein S12	>sp|P25398|RS12_HUMAN 40S ribosomal protein S12 OS=Homo sapiens GN=RPS12 PE=1 SV=3	14.515	2.3212e-24	1		1.14088	0.0572381	0.0757356	1.1207	0	0	0			0	0	0	0	22.7	3	3	1.0239	91.196	3	3621800	1706700	1915100	32.6	3	3	1.2483	63.158	3	1801400	984000	817430	34.1	4	4	1.16182	62.773	4	4945100	2554800	2390300
	234	H0YNH8;Q9BZF9-2;Q9BZF9;F5H2B9;H0YN48	UACA	Uveal autoantigen with coiled-coil domains and ankyrin repeats	>tr|H0YNH8|H0YNH8_HUMAN Uveal autoantigen with coiled-coil domains and ankyrin repeats OS=Homo sapiens GN=UACA PE=1 SV=1;>sp|Q9BZF9-2|UACA_HUMAN Isoform 2 of Uveal autoantigen with coiled-coil domains and ankyrin repeats OS=Homo sapiens GN=UACA;>sp|Q9BZF9|	161.31	8.8801e-11	5		1.14301	0.0580491	0.0757356	1.1207	1.9	2	2	1.2902	0.57142	2	302830	135940	166890	0	0	0			0	0	0	0	0.9	1	1	1.11429	NaN	1	88618	53200	35418	2.6	3	3	1.0387	14.537	3	589360	306780	282580
	1001	Q9P270;D6RIF6;H0Y9L2	SLAIN2	SLAIN motif-containing protein 2	>sp|Q9P270|SLAI2_HUMAN SLAIN motif-containing protein 2 OS=Homo sapiens GN=SLAIN2 PE=1 SV=2	62.543	1.2952e-69	3		1.11698	0.0480462	0.0758595	1.11999	14.1	5	5	0.99568	15.649	12	5973400	2858800	3114600	16	6	6	1.0254	28.184	9	7564700	3843400	3721300	16	6	6	1.2458	17.455	15	6011800	3377900	2633900	17.2	7	7	1.22384	20.617	17	10771000	5729800	5041200
	773	Q6UB28	METAP1D	Methionine aminopeptidase 1D, mitochondrial	>sp|Q6UB28|MAP12_HUMAN Methionine aminopeptidase 1D, mitochondrial OS=Homo sapiens GN=METAP1D PE=1 SV=1	37.087	1.2214e-19	1		20.0836	1.30284	0.0768263	1.11449	0	0	0			0	0	0	0	14.6	3	3	9.5784	NaN	1	1256400	28172	1228200	9.3	2	2	42.1106	NaN	1	332380	331730	653.29	6	1	1			0	367880	367880	0
	821	Q8N0Z8;J3KTG4;Q8N0Z8-2	PUSL1	tRNA pseudouridine synthase-like 1;tRNA pseudouridine synthase	>sp|Q8N0Z8|PUSL1_HUMAN tRNA pseudouridine synthase-like 1 OS=Homo sapiens GN=PUSL1 PE=1 SV=1;>tr|J3KTG4|J3KTG4_HUMAN tRNA pseudouridine synthase (Fragment) OS=Homo sapiens GN=PUSL1 PE=3 SV=2;>sp|Q8N0Z8-2|PUSL1_HUMAN Isoform 2 of tRNA pseudouridine synthase	33.232	2.4807e-20	3		1.50592	0.177802	0.0771223	1.11282	0	0	0			0	0	0	0	11.6	3	3	1.0517	46.45	3	1158600	511830	646740	5.6	2	2	1.86112	103.34	2	682020	424090	257930	12.5	4	4	1.74477	33.421	4	1447200	897920	549240
	850	Q8WXD5;B9A037;B8ZZ85	GEMIN6	Gem-associated protein 6	>sp|Q8WXD5|GEMI6_HUMAN Gem-associated protein 6 OS=Homo sapiens GN=GEMIN6 PE=1 SV=1	18.824	1.8297e-24	3		1.2659	0.102398	0.0779471	1.1082	28.7	5	5	1.2673	97.33	5	4048600	1721700	2327000	28.1	4	4	0.88865	7.5186	3	3029800	1351600	1678200	15.6	2	2	1.54414	74.016	5	2089300	1174900	914420	21.6	3	3	1.47671	64.573	6	3356800	1979500	1377300
	832	Q8NC51-3;Q8NC51;Q8NC51-4;Q8NC51-2	SERBP1	Plasminogen activator inhibitor 1 RNA-binding protein	>sp|Q8NC51-3|PAIRB_HUMAN Isoform 3 of Plasminogen activator inhibitor 1 RNA-binding protein OS=Homo sapiens GN=SERBP1;>sp|Q8NC51|PAIRB_HUMAN Plasminogen activator inhibitor 1 RNA-binding protein OS=Homo sapiens GN=SERBP1 PE=1 SV=2;>sp|Q8NC51-4|PAIRB_HUMAN	43.135	2.6811e-65	4		1.14056	0.05712	0.0799595	1.09713	11.7	3	3	0.96546	9.1546	3	941450	466380	475060	10.7	3	3	1.1255	6.2406	3	469540	198960	270580	18.3	6	6	1.33826	27.387	6	1519800	815740	704070	22.4	7	7	1.16375	12.839	6	2839900	1369100	1470800
	10	A6NC17;P56192;H0YHV5;B3KVK7;H0YIC2;H0YHL6;H0YI94;H0YI27;H0YIP0	MARS	Methionine--tRNA ligase, cytoplasmic	>tr|A6NC17|A6NC17_HUMAN Methionine--tRNA ligase, cytoplasmic OS=Homo sapiens GN=MARS PE=1 SV=3;>sp|P56192|SYMC_HUMAN Methionine--tRNA ligase, cytoplasmic OS=Homo sapiens GN=MARS PE=1 SV=2;>tr|H0YHV5|H0YHV5_HUMAN Methionine--tRNA ligase, cytoplasmic (Fragme	71.827	3.3186e-26	9		1.19406	0.0770273	0.080917	1.09196	3.3	2	2	1.0198	42.144	2	652190	369090	283100	0	0	0			0	0	0	0	5.7	3	3	1.36193	NaN	1	188700	101600	87104	7.6	4	4	1.22578	67.852	4	2069000	994360	1074600
	9	A5YKK6-2;A5YKK6;B5MDN3;A5YKK6-3;H3BMZ2;A5YKK6-4;H3BVC9	CNOT1	CCR4-NOT transcription complex subunit 1	>sp|A5YKK6-2|CNOT1_HUMAN Isoform 2 of CCR4-NOT transcription complex subunit 1 OS=Homo sapiens GN=CNOT1;>sp|A5YKK6|CNOT1_HUMAN CCR4-NOT transcription complex subunit 1 OS=Homo sapiens GN=CNOT1 PE=1 SV=2;>tr|B5MDN3|B5MDN3_HUMAN CCR4-NOT transcription comple	266.38	2.9672e-30	7		1.14136	0.0574226	0.08124	1.09023	3.6	7	7	1.0438	30.457	12	2780100	1345100	1435000	1.3	3	3	0.97575	12.65	4	983880	533410	450470	3.5	7	7	1.2696	23.134	9	1398900	753940	644950	1.8	4	4	1.3124	12.443	3	669150	373040	296120
	560	P49411;H3BNU3	TUFM	Elongation factor Tu, mitochondrial	>sp|P49411|EFTU_HUMAN Elongation factor Tu, mitochondrial OS=Homo sapiens GN=TUFM PE=1 SV=2	49.541	1.1e-106	2		1.35622	0.132329	0.0818163	1.08716	23	8	8	1.0324	114.77	16	35418000	22979000	12439000	36.1	12	12	1.0232	87.029	30	49263000	27419000	21844000	27.9	10	10	1.94666	113.67	24	26959000	19647000	7311500	36.9	13	13	1.6452	93.042	27	57216000	38327000	18889000
	618	P62854;Q5JNZ5	RPS26;RPS26P11	40S ribosomal protein S26;Putative 40S ribosomal protein S26-like 1	>sp|P62854|RS26_HUMAN 40S ribosomal protein S26 OS=Homo sapiens GN=RPS26 PE=1 SV=3;>sp|Q5JNZ5|RS26L_HUMAN Putative 40S ribosomal protein S26-like 1 OS=Homo sapiens GN=RPS26P11 PE=5 SV=1	13.015	4.092e-11	2		1.39231	0.143736	0.0827409	1.08228	0	0	0			0	0	0	0	13	1	1	1.0453	NaN	1	398350	196070	202290	13	1	1	1.7785	NaN	1	117040	76208	40837	20.9	2	2	1.45182	94.592	4	1231100	778590	452470
	243	P04085-2;H7BYW6;P04085	PDGFA	Platelet-derived growth factor subunit A	>sp|P04085-2|PDGFA_HUMAN Isoform Short of Platelet-derived growth factor subunit A OS=Homo sapiens GN=PDGFA;>tr|H7BYW6|H7BYW6_HUMAN Platelet-derived growth factor subunit A (Fragment) OS=Homo sapiens GN=PDGFA PE=3 SV=2;>sp|P04085|PDGFA_HUMAN Platelet-deriv	22.253	3.1242e-43	3		1.16268	0.0654587	0.0830176	1.08083	13.3	2	2	1.2234	NaN	1	847460	358540	488920	9.2	1	1	1.4508	NaN	1	1433000	481380	951620	13.3	2	2	0.966464	22.64	2	1331800	673600	658170	13.3	2	2	1.0653	36.335	2	1994400	972990	1021500
	626	P63244;J3KPE3;H0YAF8;D6RHH4;D6R9Z1;D6RAC2;D6R9L0;D6RFX4;D6REE5;D6RF23;H0Y8R5;D6RFZ9;D6RAU2;E9PD14;D6RBD0;D6RGK8;D6RHJ5;D6R909	GNB2L1	Guanine nucleotide-binding protein subunit beta-2-like 1	>sp|P63244|GBLP_HUMAN Guanine nucleotide-binding protein subunit beta-2-like 1 OS=Homo sapiens GN=GNB2L1 PE=1 SV=3;>tr|J3KPE3|J3KPE3_HUMAN Guanine nucleotide-binding protein subunit beta-2-like 1 OS=Homo sapiens GN=GNB2L1 PE=1 SV=1;>tr|H0YAF8|H0YAF8_HUMAN	35.076	4.8136e-119	18		1.18083	0.0721875	0.0840814	1.0753	27.4	7	2	1.1148	65.792	3	15922000	3850100	12072000	47.3	11	2	0.93578	70.489	3	2774900	1295100	1479800	36	10	2	1.40744	79.057	3	1858400	1081200	777170	47.3	11	2	1.32419	48.471	4	13441000	11206000	2234500
	599	P61604;B8ZZ54;B8ZZL8;S4R3N1	HSPE1	10 kDa heat shock protein, mitochondrial	>sp|P61604|CH10_HUMAN 10 kDa heat shock protein, mitochondrial OS=Homo sapiens GN=HSPE1 PE=1 SV=2;>tr|B8ZZ54|B8ZZ54_HUMAN 10 kDa heat shock protein, mitochondrial OS=Homo sapiens GN=HSPE1 PE=1 SV=1;>tr|B8ZZL8|B8ZZL8_HUMAN 10 kDa heat shock protein, mitocho	10.932	7.1439e-16	4		1.45838	0.163872	0.0848653	1.07127	0	0	0			0	0	0	0	21.6	2	2	1.0313	7.3809	2	1779600	846500	933130	11.8	1	1	1.81699	NaN	1	400800	232910	167900	25.5	2	2	1.6553	63.364	3	3390900	2184900	1206000
	489	P24390;M0R1Y2;P24390-2	KDELR1	ER lumen protein retaining receptor 1;ER lumen protein retaining receptor	>sp|P24390|ERD21_HUMAN ER lumen protein-retaining receptor 1 OS=Homo sapiens GN=KDELR1 PE=1 SV=1;>tr|M0R1Y2|M0R1Y2_HUMAN ER lumen protein-retaining receptor 1 (Fragment) OS=Homo sapiens GN=KDELR1 PE=4 SV=1;>sp|P24390-2|ERD21_HUMAN Isoform 2 of ER lumen pro	24.542	2.1531e-42	3		1.11311	0.0465386	0.0892463	1.04941	27.8	4	3	1.1627	142.42	4	5865000	2889800	2975300	27.8	4	3	0.97434	83.516	5	4014400	1783100	2231400	27.8	4	3	1.30664	44.89	3	2352100	1298200	1054000	19.8	3	2	1.0371	NaN	1	1336000	685820	650210
	3	Q99798;A2A274	ACO2	Aconitate hydratase, mitochondrial	>sp|Q99798|ACON_HUMAN Aconitate hydratase, mitochondrial OS=Homo sapiens GN=ACO2 PE=1 SV=2;>tr|A2A274|A2A274_HUMAN Aconitate hydratase, mitochondrial OS=Homo sapiens GN=ACO2 PE=1 SV=1	85.424	1.2871e-14	2		2.85605	0.455766	0.0908657	1.0416	1.7	1	1	1.5188	NaN	1	291120	120830	170290	2.1	1	1			0	0	0	0	2.1	1	1	1.91446	NaN	1	54236	38545	15692	1.5	1	1	8.01218	117.52	5	19591000	17542000	2049400
	429	P0CW22;P08708;H0YN88;H0YK46;H0YN73;H3BNC9	RPS17L;RPS17	40S ribosomal protein S17-like;40S ribosomal protein S17	>sp|P0CW22|RS17L_HUMAN 40S ribosomal protein S17-like OS=Homo sapiens GN=RPS17L PE=1 SV=1;>sp|P08708|RS17_HUMAN 40S ribosomal protein S17 OS=Homo sapiens GN=RPS17 PE=1 SV=2;>tr|H0YN88|H0YN88_HUMAN 40S ribosomal protein S17 OS=Homo sapiens GN=RPS17L PE=1 SV	15.55	7.0996e-59	6		1.12864	0.0525572	0.0940611	1.02659	31.9	3	3	1.0936	31.653	3	1287900	642030	645890	23.7	2	2	0.95997	102.64	3	1407300	683470	723870	39.3	5	5	1.15644	60.192	5	1928700	988950	939800	23.7	2	2	1.33656	46.812	3	790950	463090	327860
	334	V9GYU0;O60830;V9GYS0;O60830-2	TIMM17B	Mitochondrial import inner membrane translocase subunit Tim17-B	>tr|V9GYU0|V9GYU0_HUMAN Mitochondrial import inner membrane translocase subunit Tim17-B (Fragment) OS=Homo sapiens GN=TIMM17B PE=4 SV=1;>sp|O60830|TI17B_HUMAN Mitochondrial import inner membrane translocase subunit Tim17-B OS=Homo sapiens GN=TIMM17B PE=1 S	17.023	0.00079462	4		3.4072	0.532398	0.0943192	1.0254	13.8	1	1	1.8358	NaN	1	441080	73119	367960	13.8	1	1	1.8265	NaN	1	324130	123670	200460	13.8	1	1	11.7963	NaN	1	325520	315140	10382	0	0	0			0	0	0	0
	217	G3V153;Q14444-2;Q14444;E9PP31;E9PLA9	CAPRIN1	Caprin-1	>tr|G3V153|G3V153_HUMAN Caprin-1 OS=Homo sapiens GN=CAPRIN1 PE=1 SV=1;>sp|Q14444-2|CAPR1_HUMAN Isoform 2 of Caprin-1 OS=Homo sapiens GN=CAPRIN1;>sp|Q14444|CAPR1_HUMAN Caprin-1 OS=Homo sapiens GN=CAPRIN1 PE=1 SV=2;>tr|E9PP31|E9PP31_HUMAN Uncharacterized pro	70.353	3.5753e-12	5		1.06931	0.0291027	0.0952051	1.02134	1.8	1	1	1.2056	NaN	1	585640	309560	276080	3.7	2	2	0.99419	9.1383	2	760750	381630	379110	1.8	1	1	1.0142	NaN	1	213840	120840	93008	3.3	2	2	1.07551	21.005	2	860100	448230	411870
	598	P61353;K7ELC7;K7ERY7;K7EQQ9	RPL27	60S ribosomal protein L27	>sp|P61353|RL27_HUMAN 60S ribosomal protein L27 OS=Homo sapiens GN=RPL27 PE=1 SV=2;>tr|K7ELC7|K7ELC7_HUMAN 60S ribosomal protein L27 (Fragment) OS=Homo sapiens GN=RPL27 PE=1 SV=1	15.798	2.5139e-14	4		1.1424	0.057819	0.0972882	1.01194	27.9	3	3	1.0259	94.237	3	5534500	2732400	2802000	27.9	3	3	0.98765	130.13	3	5495100	2673800	2821300	27.9	3	3	1.3543	92.219	3	4891600	2726600	2165000	27.9	3	3	1.24123	56.367	5	7483100	4252100	3230900
	515	P31944	CASP14	Caspase-14;Caspase-14 subunit p19;Caspase-14 subunit p10	>sp|P31944|CASPE_HUMAN Caspase-14 OS=Homo sapiens GN=CASP14 PE=1 SV=2	27.679	4.1936e-88	1		3.33594	0.523218	0.100576	0.997504	15.3	3	3			0	1141800	1141800	0	15.3	3	3			0	1799700	1799700	0	21.1	3	3	4.94193	NaN	1	783450	781470	1978	45.5	8	8	2.25185	161.94	5	5721000	5067100	653910
	760	Q5UIP0-2;Q5UIP0;H7C2B5;H7BZN3	RIF1	Telomere-associated protein RIF1	>sp|Q5UIP0-2|RIF1_HUMAN Isoform 2 of Telomere-associated protein RIF1 OS=Homo sapiens GN=RIF1;>sp|Q5UIP0|RIF1_HUMAN Telomere-associated protein RIF1 OS=Homo sapiens GN=RIF1 PE=1 SV=2	271.69	2.4479e-12	4		1.41985	0.152242	0.105407	0.977131	1.2	2	2	0.73914	57.847	2	599080	329190	269890	0.5	1	1	1.6866	NaN	1	373650	164820	208830	0.5	1	1	2.01098	NaN	1	203380	139380	64001	2.8	3	3	1.62114	7.599	2	1902800	519150	1383600
	377	P00156	MT-CYB	Cytochrome b	>sp|P00156|CYB_HUMAN Cytochrome b OS=Homo sapiens GN=MT-CYB PE=1 SV=2	42.717	3.2629e-08	1		2.78844	0.445361	0.106689	0.971881	0	0	0			0	0	0	0	5	2	2	3.9667	38.137	2	2333600	635150	1698500	5	2	2	1.96017	17.063	2	1049800	691420	358360	0	0	0			0	0	0	0
	160	E7EUY0;P78527-2;P78527	PRKDC	DNA-dependent protein kinase catalytic subunit	>tr|E7EUY0|E7EUY0_HUMAN DNA-dependent protein kinase catalytic subunit OS=Homo sapiens GN=PRKDC PE=1 SV=1;>sp|P78527-2|PRKDC_HUMAN Isoform 2 of DNA-dependent protein kinase catalytic subunit OS=Homo sapiens GN=PRKDC;>sp|P78527|PRKDC_HUMAN DNA-dependent pro	465.38	4.955e-91	3		1.18487	0.0736713	0.10695	0.970819	7.7	26	26	1.0391	42.106	26	13437000	5572300	7864900	1.1	4	4	0.93419	24.796	4	1447200	763340	683860	2.7	11	11	1.37009	96.253	10	4749300	1383900	3365400	2.9	10	10	1.48199	35.956	10	5050000	2819200	2230800
	747	Q5T160	RARS2	Probable arginine--tRNA ligase, mitochondrial	>sp|Q5T160|SYRM_HUMAN Probable arginine--tRNA ligase, mitochondrial OS=Homo sapiens GN=RARS2 PE=1 SV=1	65.505	2.9112e-07	1		1.46778	0.166661	0.108	0.966575	0	0	0			0	0	0	0	4.5	2	2	1.6886	2.3387	2	269520	91427	178100	2.1	1	1	1.27584	NaN	1	44214	26516	17698	0	0	0			0	0	0	0
	38	E9PGZ4;B4DK71;Q9NTJ5;C9JV50;F8WDN7	SACM1L	Phosphatidylinositide phosphatase SAC1	>tr|E9PGZ4|E9PGZ4_HUMAN Phosphatidylinositide phosphatase SAC1 OS=Homo sapiens GN=SACM1L PE=1 SV=1;>tr|B4DK71|B4DK71_HUMAN Phosphatidylinositide phosphatase SAC1 OS=Homo sapiens GN=SACM1L PE=1 SV=1;>sp|Q9NTJ5|SAC1_HUMAN Phosphatidylinositide phosphatase SA	55.571	1.4727e-17	5		1.13904	0.0565392	0.108182	0.965843	3.9	2	2	1.2885	20.836	2	427850	197420	230430	8.1	4	4	0.89348	18.114	4	1335200	694760	640480	7.9	4	4	1.24875	51.009	3	812640	359110	453520	7.6	4	4	1.17088	18.909	4	1623300	809790	813480
	354	O75947-2;O75947;F5H608	ATP5H	ATP synthase subunit d, mitochondrial	>sp|O75947-2|ATP5H_HUMAN Isoform 2 of ATP synthase subunit d, mitochondrial OS=Homo sapiens GN=ATP5H;>sp|O75947|ATP5H_HUMAN ATP synthase subunit d, mitochondrial OS=Homo sapiens GN=ATP5H PE=1 SV=3;>tr|F5H608|F5H608_HUMAN ATP synthase subunit d, mitochondri	15.773	8.179e-08	3		2.38684	0.377824	0.109695	0.959815	6.6	1	1	1.6233	NaN	1	1793000	667780	1125200	26.3	3	3	1.3231	102.02	2	384000	159770	224230	6.6	1	1	6.33112	NaN	1	177520	162470	15043	0	0	0			0	0	0	0
	647	Q00059;H7BYN3;Q00059-2	TFAM	Transcription factor A, mitochondrial	>sp|Q00059|TFAM_HUMAN Transcription factor A, mitochondrial OS=Homo sapiens GN=TFAM PE=1 SV=1;>tr|H7BYN3|H7BYN3_HUMAN Transcription factor A, mitochondrial (Fragment) OS=Homo sapiens GN=TFAM PE=1 SV=1;>sp|Q00059-2|TFAM_HUMAN Isoform 2 of Transcription fact	29.096	1.4887e-22	3		1.09531	0.0395361	0.111731	0.951826	22	5	5	1.0028	65.9	32	54202000	27421000	26781000	22	5	5	0.96782	54.802	28	45852000	23442000	22410000	22	5	5	1.209	53.561	38	38115000	21687000	16429000	18.7	4	4	1.22662	32.658	25	38067000	21144000	16922000
	581	P54136;F5H3T8;P54136-2;E5RH09;E5RJM9	RARS	Arginine--tRNA ligase, cytoplasmic	>sp|P54136|SYRC_HUMAN Arginine--tRNA ligase, cytoplasmic OS=Homo sapiens GN=RARS PE=1 SV=2;>tr|F5H3T8|F5H3T8_HUMAN Arginine--tRNA ligase, cytoplasmic OS=Homo sapiens GN=RARS PE=1 SV=1;>sp|P54136-2|SYRC_HUMAN Isoform Monomeric of Arginine--tRNA ligase, cyto	75.378	1.5985e-10	5		1.85479	0.268295	0.111849	0.951369	1.7	1	1	1.2741	NaN	1	184190	81992	102200	0	0	0			0	0	0	0	1.5	1	1	3.76322	NaN	1	237120	139620	97506	4.4	3	3	1.33083	34.965	3	1413700	712670	700990
	607	P62269;J3JS69	RPS18	40S ribosomal protein S18	>sp|P62269|RS18_HUMAN 40S ribosomal protein S18 OS=Homo sapiens GN=RPS18 PE=1 SV=3	17.718	5.2751e-36	2		1.10111	0.0418301	0.111903	0.951157	42.8	7	7	0.98284	85.128	7	8535300	4217500	4317800	38.2	8	8	0.99508	104.95	8	8732600	4149800	4582800	37.5	7	7	1.19497	83.66	7	7687900	4315900	3372000	27	6	6	1.25783	61.772	11	7454400	4260600	3193800
	487	P23396;P23396-2;E9PL09;E9PPU1;F2Z2S8;H0YCJ7;H0YEU2;H0YF32;E9PQ96;E9PJH4;E9PK82;E9PSF4;E9PQX2;H0YES8	RPS3	40S ribosomal protein S3	>sp|P23396|RS3_HUMAN 40S ribosomal protein S3 OS=Homo sapiens GN=RPS3 PE=1 SV=2;>sp|P23396-2|RS3_HUMAN Isoform 2 of 40S ribosomal protein S3 OS=Homo sapiens GN=RPS3;>tr|E9PL09|E9PL09_HUMAN 40S ribosomal protein S3 OS=Homo sapiens GN=RPS3 PE=1 SV=1;>tr|E9PP	26.688	5.1731e-55	14		1.10562	0.0436053	0.112769	0.94781	43.2	11	11	0.99099	98.141	11	16033000	8323500	7709900	42.4	10	10	0.96849	89.65	10	17123000	8931500	8191700	50.2	10	10	1.20624	71.195	10	11825000	6174700	5649900	53.1	11	11	1.29069	77.412	12	23285000	13411000	9874000
	0	A0FGR8-4;H7BXI1;A0FGR8-2;A0FGR8;A0FGR8-6;F2Z3K9;A0FGR8-5	ESYT2	Extended synaptotagmin-2	>sp|A0FGR8-4|ESYT2_HUMAN Isoform 4 of Extended synaptotagmin-2 OS=Homo sapiens GN=ESYT2;>tr|H7BXI1|H7BXI1_HUMAN Extended synaptotagmin-2 (Fragment) OS=Homo sapiens GN=ESYT2 PE=1 SV=1;>sp|A0FGR8-2|ESYT2_HUMAN Isoform 2 of Extended synaptotagmin-2 OS=Homo sa	59.403	1.4563e-06	7		1.18023	0.0719661	0.1135	0.945006	2.5	1	1	0.97284	NaN	1	36030	13719	22311	0	0	0			0	0	0	0	5.3	2	2	1.35289	NaN	1	148240	91720	56522	2.8	1	1	1.24909	NaN	1	199390	88873	110510
	983	Q9NXS2;K7EQG1;Q9NXS2-3	QPCTL	Glutaminyl-peptide cyclotransferase-like protein	>sp|Q9NXS2|QPCTL_HUMAN Glutaminyl-peptide cyclotransferase-like protein OS=Homo sapiens GN=QPCTL PE=1 SV=2;>tr|K7EQG1|K7EQG1_HUMAN Glutaminyl-peptide cyclotransferase-like protein (Fragment) OS=Homo sapiens GN=QPCTL PE=1 SV=1;>sp|Q9NXS2-3|QPCTL_HUMAN Isofo	42.924	7.7272e-57	3		1.12732	0.0520486	0.113907	0.943448	18.1	6	6	0.92351	64.151	10	13301000	6640400	6660400	19.6	7	7	1.0471	61.498	18	22639000	10835000	11804000	12.8	5	5	1.2988	65.814	18	13617000	7488700	6128500	13.6	6	6	1.28594	71.478	20	28801000	15867000	12934000
	47	B4DRF4;Q9P035	PTPLAD1	Very-long-chain (3R)-3-hydroxyacyl-[acyl-carrier protein] dehydratase 3	>tr|B4DRF4|B4DRF4_HUMAN Very-long-chain (3R)-3-hydroxyacyl-CoA dehydratase 3 OS=Homo sapiens GN=PTPLAD1 PE=1 SV=1;>sp|Q9P035|HACD3_HUMAN Very-long-chain (3R)-3-hydroxyacyl-CoA dehydratase 3 OS=Homo sapiens GN=PTPLAD1 PE=1 SV=2	36.43	7.3823e-06	2		1.11377	0.0467957	0.114456	0.941361	6.8	1	1	0.91106	NaN	1	514550	266930	247630	6.8	1	1	1.1494	NaN	1	919660	436150	483510	6.8	1	1	1.2729	1.8514	2	733170	417050	316110	6.8	1	1	1.15444	NaN	1	832920	373210	459710
	704	Q14257;Q14257-2;A8MXP8;H0YL43	RCN2	Reticulocalbin-2	>sp|Q14257|RCN2_HUMAN Reticulocalbin-2 OS=Homo sapiens GN=RCN2 PE=1 SV=1;>sp|Q14257-2|RCN2_HUMAN Isoform 2 of Reticulocalbin-2 OS=Homo sapiens GN=RCN2;>tr|A8MXP8|A8MXP8_HUMAN Reticulocalbin-2 OS=Homo sapiens GN=RCN2 PE=1 SV=1	36.876	7.2093e-151	4		1.14483	0.0587397	0.11652	0.933599	17	3	3	0.95999	22.555	2	2194900	1163200	1031700	13.6	3	3	1.0166	53.633	3	2029000	971470	1057600	32.2	7	7	1.42827	89.512	6	4600500	2714100	1886400	31.9	6	6	1.23235	86.013	4	7518200	4267500	3250700
	896	Q99417	MYCBP	C-Myc-binding protein	>sp|Q99417|MYCBP_HUMAN C-Myc-binding protein OS=Homo sapiens GN=MYCBP PE=1 SV=3	11.967	2.6041e-33	1		1.11732	0.0481779	0.117088	0.931487	30.1	2	2	1.0574	15.223	2	1849600	888930	960640	58.3	5	5	0.95095	80.263	6	9633400	4818700	4814700	67	5	5	1.34434	62.064	6	8712000	5149000	3563000	67	6	6	1.15294	72.667	9	9575700	5260800	4314900
	82	C9J9K3;P08865;A6NE09;C9JQR9	RPSA;RPSAP58	40S ribosomal protein SA	>tr|C9J9K3|C9J9K3_HUMAN 40S ribosomal protein SA (Fragment) OS=Homo sapiens GN=RPSA PE=1 SV=2;>sp|P08865|RSSA_HUMAN 40S ribosomal protein SA OS=Homo sapiens GN=RPSA PE=1 SV=4;>tr|A6NE09|A6NE09_HUMAN 40S ribosomal protein SA OS=Homo sapiens GN=RPSAP58 PE=3	29.404	1.2567e-124	4		1.16017	0.0645235	0.118321	0.926937	44.9	8	8	0.96916	56.552	10	11461000	5882600	5578000	40.7	8	8	0.97962	32.102	11	19451000	9681900	9768900	44.9	9	9	1.32081	53.002	11	9467900	5205500	4262400	40.7	7	7	1.44477	93.364	6	18312000	9802200	8509300
	823	Q8N3C0;Q8N3C0-4	ASCC3	Activating signal cointegrator 1 complex subunit 3	>sp|Q8N3C0|ASCC3_HUMAN Activating signal cointegrator 1 complex subunit 3 OS=Homo sapiens GN=ASCC3 PE=1 SV=3	251.46	7.9484e-09	2		1.27067	0.104034	0.119694	0.921928	0.4	1	1	1.5342	NaN	1	101670	44615	57058	0	0	0			0	0	0	0	0.9	2	2	1.40909	4.8174	2	242460	141260	101200	1	2	2	0.949037	115.29	3	2121200	1560100	561140
	615	P62701;A6NH36;C9JEH7;P22090;Q8TD47	RPS4X	40S ribosomal protein S4, X isoform	>sp|P62701|RS4X_HUMAN 40S ribosomal protein S4, X isoform OS=Homo sapiens GN=RPS4X PE=1 SV=2	29.597	4.1933e-71	5		1.08819	0.0367058	0.120254	0.9199	30	9	9	0.98369	80.117	10	12996000	6223700	6772200	44.1	12	12	1.021	79.239	13	17447000	8733800	8712700	30.4	8	8	1.26231	56.428	9	6742300	3649600	3092700	25.5	7	7	1.10605	65.705	12	13332000	6910300	6421400
	368	O95292;E5RK64;O95292-2	VAPB	Vesicle-associated membrane protein-associated protein B/C	>sp|O95292|VAPB_HUMAN Vesicle-associated membrane protein-associated protein B/C OS=Homo sapiens GN=VAPB PE=1 SV=3;>tr|E5RK64|E5RK64_HUMAN Vesicle-associated membrane protein-associated protein B/C OS=Homo sapiens GN=VAPB PE=1 SV=1;>sp|O95292-2|VAPB_HUMAN	27.228	1.8528e-14	3		1.26238	0.10119	0.121119	0.916788	4.9	1	0			0	0	0	0	4.9	1	0			0	0	0	0	5.3	1	1	1.37979	37.481	2	325330	156310	169010	10.3	2	1	1.15496	NaN	1	339100	201080	138020
	819	Q8IYU8	MICU2	Calcium uptake protein 2, mitochondrial	>sp|Q8IYU8|MICU2_HUMAN Calcium uptake protein 2, mitochondrial OS=Homo sapiens GN=MICU2 PE=1 SV=2	49.666	3.4599e-30	1		1.47518	0.168846	0.121832	0.91424	3.9	1	1	0.88503	NaN	1	286610	165600	121010	4.6	1	1	3.0656	NaN	1	409010	71837	337180	3.9	1	1	1.11679	NaN	1	271020	143380	127640	3.9	1	1	1.56292	NaN	1	505130	284630	220500
	309	Q5VV87;O14880;Q5VV89	MGST3	Microsomal glutathione S-transferase 3	>tr|Q5VV87|Q5VV87_HUMAN Microsomal glutathione S-transferase 3 OS=Homo sapiens GN=MGST3 PE=1 SV=1;>sp|O14880|MGST3_HUMAN Microsomal glutathione S-transferase 3 OS=Homo sapiens GN=MGST3 PE=1 SV=1;>tr|Q5VV89|Q5VV89_HUMAN Microsomal glutathione S-transferase	14.379	3.5474e-07	3		1.29864	0.113489	0.122502	0.911858	0	0	0			0	0	0	0	10.1	1	1	0.99523	NaN	1	1051600	545630	505950	10.1	1	1	1.73983	NaN	1	340120	215860	124270	10.1	1	1	1.26485	NaN	1	763360	390440	372920
	915	Q9BUB7-2;Q9BUB7	TMEM70	Transmembrane protein 70, mitochondrial	>sp|Q9BUB7-2|TMM70_HUMAN Isoform 2 of Transmembrane protein 70, mitochondrial OS=Homo sapiens GN=TMEM70;>sp|Q9BUB7|TMM70_HUMAN Transmembrane protein 70, mitochondrial OS=Homo sapiens GN=TMEM70 PE=1 SV=2	18.57	0.0001213	2		3.59368	0.55554	0.122599	0.911512	6.8	1	1	6.0104	NaN	1	322300	53325	268980	6.8	1	1	2.1487	NaN	1	278960	35867	243090	0	0	0			0	0	0	0	0	0	0			0	0	0	0
	35	Q96DH6-2;B4DHE8;Q96DH6;J3QKT5;J3KTC1;Q96DH6-3;B4DM51	MSI2	RNA-binding protein Musashi homolog 2	>sp|Q96DH6-2|MSI2H_HUMAN Isoform 2 of RNA-binding protein Musashi homolog 2 OS=Homo sapiens GN=MSI2;>tr|B4DHE8|B4DHE8_HUMAN RNA-binding protein Musashi homolog 2 OS=Homo sapiens GN=MSI2 PE=1 SV=1;>sp|Q96DH6|MSI2H_HUMAN RNA-binding protein Musashi homolog 2	28.42	4.3886e-08	7		1.22726	0.0889373	0.123691	0.907662	0	0	0			0	0	0	0	10.8	2	2	1.0422	69.922	2	899300	352020	547270	16.7	3	3	1.12698	30.177	3	611780	302010	309780	4.8	1	1	1.57379	NaN	1	101860	63507	38353
	663	Q07065	CKAP4	Cytoskeleton-associated protein 4	>sp|Q07065|CKAP4_HUMAN Cytoskeleton-associated protein 4 OS=Homo sapiens GN=CKAP4 PE=1 SV=2	66.022	4.1331e-55	1		1.07299	0.0305971	0.124813	0.903741	22.4	11	11	1.0101	27.969	13	5897300	2817400	3080000	16.1	8	8	0.97417	63.631	9	8772000	4114200	4657800	9.6	5	5	1.18749	15.065	6	1883600	1028900	854700	12	6	6	1.13438	32.257	12	6982900	3628600	3354300
	182	S4R3W3;E9PQV6;Q9BPX6-5;Q9BPX6-4;Q9BPX6-2;Q9BPX6;H9KVB8;Q9BPX6-3;F6XEV2	MICU1	Calcium uptake protein 1, mitochondrial	>tr|S4R3W3|S4R3W3_HUMAN Calcium uptake protein 1, mitochondrial (Fragment) OS=Homo sapiens GN=MICU1 PE=4 SV=1;>tr|E9PQV6|E9PQV6_HUMAN Calcium uptake protein 1, mitochondrial (Fragment) OS=Homo sapiens GN=MICU1 PE=4 SV=3;>sp|Q9BPX6-5|MICU1_HUMAN Isoform 5 o	17.985	2.7534e-08	9		1.10788	0.0444928	0.127954	0.892945	11	1	1	0.96823	NaN	1	56344	34725	21619	0	0	0			0	0	0	0	16.2	2	2	1.2214	22.938	2	158060	77915	80145	5.2	1	1	1.14985	NaN	1	238940	125520	113420
	546	P46783;F6U211;Q9NQ39;S4R435	RPS10;RPS10P5	40S ribosomal protein S10;Putative 40S ribosomal protein S10-like	>sp|P46783|RS10_HUMAN 40S ribosomal protein S10 OS=Homo sapiens GN=RPS10 PE=1 SV=1;>tr|F6U211|F6U211_HUMAN 40S ribosomal protein S10 OS=Homo sapiens GN=RPS10 PE=4 SV=1;>sp|Q9NQ39|RS10L_HUMAN Putative 40S ribosomal protein S10-like OS=Homo sapiens GN=RPS10P	18.898	2.3654e-24	4		1.16327	0.0656791	0.128122	0.892375	14.5	2	2	1.0001	89.298	2	3049500	1326400	1723000	23	3	3	0.95534	14.081	3	4137600	2037100	2100500	29.1	5	5	1.26121	75.019	6	4999300	2754400	2244900	23.6	4	4	1.5196	64.923	9	6763400	3875400	2888100
	302	O00461;F8W785	GOLIM4	Golgi integral membrane protein 4	>sp|O00461|GOLI4_HUMAN Golgi integral membrane protein 4 OS=Homo sapiens GN=GOLIM4 PE=1 SV=1;>tr|F8W785|F8W785_HUMAN Golgi integral membrane protein 4 OS=Homo sapiens GN=GOLIM4 PE=1 SV=1	81.879	7.5233e-38	2		1.24457	0.0950201	0.130776	0.883471	4.6	2	2	1.0486	47.269	3	417710	176660	241050	2	1	1	0.8634	NaN	1	50505	25892	24612	7.8	4	4	1.71224	20.477	4	821480	474280	347200	9.9	6	6	1.54772	21.652	7	1751100	921420	829680
	393	P03891	MT-ND2	NADH-ubiquinone oxidoreductase chain 2	>sp|P03891|NU2M_HUMAN NADH-ubiquinone oxidoreductase chain 2 OS=Homo sapiens GN=MT-ND2 PE=1 SV=2	38.96	2.3999e-05	1		1.64133	0.215195	0.132438	0.877989	2.6	1	1	1.3171	NaN	1	2626800	1112200	1514600	0	0	0			0	0	0	0	0	0	0			0	0	0	0	7.5	2	2	2.04537	33.046	2	3605600	2421800	1183800
	36	P31942-6;P31942-5;P31942-4;B4DHY1;P31942-3;P31942-2;P31942	HNRNPH3	Heterogeneous nuclear ribonucleoprotein H3	>sp|P31942-6|HNRH3_HUMAN Isoform 6 of Heterogeneous nuclear ribonucleoprotein H3 OS=Homo sapiens GN=HNRNPH3;>sp|P31942-5|HNRH3_HUMAN Isoform 5 of Heterogeneous nuclear ribonucleoprotein H3 OS=Homo sapiens GN=HNRNPH3;>sp|P31942-4|HNRH3_HUMAN Isoform 4 of He	15.413	0.00084421	7		1.23604	0.0920319	0.133125	0.875741	0	0	0			0	0	0	0	0	0	0			0	0	0	0	12.2	1	1	1.34733	NaN	1	111350	61957	49398	12.2	1	1	1.13394	NaN	1	155680	92620	63065
	646	P98175-2;P98175;P98175-4;P98175-3;B4DNY1;P78332-2;E9PGM9;P52756	RBM10	RNA-binding protein 10	>sp|P98175-2|RBM10_HUMAN Isoform 2 of RNA-binding protein 10 OS=Homo sapiens GN=RBM10;>sp|P98175|RBM10_HUMAN RNA-binding protein 10 OS=Homo sapiens GN=RBM10 PE=1 SV=3;>sp|P98175-4|RBM10_HUMAN Isoform 4 of RNA-binding protein 10 OS=Homo sapiens GN=RBM10;>sp	103.43	0	8		1.18189	0.0725784	0.135326	0.86862	36.1	33	32	0.95531	28.196	58	158240000	76845000	81392000	30.5	26	25	0.95859	40.857	37	124240000	62133000	62111000	37.1	37	35	1.45936	41.012	58	148840000	88177000	60662000	39.6	36	35	1.46007	34.711	64	246010000	142690000	103320000
	458	P14854	COX6B1	Cytochrome c oxidase subunit 6B1	>sp|P14854|CX6B1_HUMAN Cytochrome c oxidase subunit 6B1 OS=Homo sapiens GN=COX6B1 PE=1 SV=2	10.192	6.2889e-12	1		1.47352	0.168357	0.1358	0.867101	0	0	0			0	0	0	0	26.7	2	2	1.2353	25.62	2	2456700	913780	1542900	47.7	3	3	1.75769	80.782	3	7540000	6464500	1075500	0	0	0			0	0	0	0
	693	Q13724-2;Q13724	MOGS	Mannosyl-oligosaccharide glucosidase	>sp|Q13724-2|MOGS_HUMAN Isoform 2 of Mannosyl-oligosaccharide glucosidase OS=Homo sapiens GN=MOGS;>sp|Q13724|MOGS_HUMAN Mannosyl-oligosaccharide glucosidase OS=Homo sapiens GN=MOGS PE=1 SV=5	80.702	0.00037476	2		1.22049	0.0865331	0.139722	0.854736	1.6	1	1	0.92685	NaN	1	167210	83312	83897	0	0	0			0	0	0	0	1.6	1	1	1.34344	NaN	1	193350	107540	85810	1.6	1	1	1.46007	NaN	1	253300	141260	112050
	779	Q6ZN17-2;Q6ZN17;Q9H9Z2	LIN28B;LIN28A	Protein lin-28 homolog B;Protein lin-28 homolog A	>sp|Q6ZN17-2|LN28B_HUMAN Isoform 2 of Protein lin-28 homolog B OS=Homo sapiens GN=LIN28B;>sp|Q6ZN17|LN28B_HUMAN Protein lin-28 homolog B OS=Homo sapiens GN=LIN28B PE=1 SV=1;>sp|Q9H9Z2|LN28A_HUMAN Protein lin-28 homolog A OS=Homo sapiens GN=LIN28A PE=1 SV=1	19.511	2.7478e-07	3		1.24175	0.0940356	0.140812	0.85136	0	0	0			0	0	0	0	14.4	2	2	1.1175	30.521	3	524350	203120	321220	6.7	1	1	1.37982	NaN	1	45394	23832	21562	0	0	0			0	0	0	0
	649	Q00341;H0Y394;Q00341-2;H7C0A4;C9JIZ1;H7BZC3;C9JZI8;C9J5E5;H7C2D1;C9JHS9;C9J739;C9JMQ6;C9JQ82;C9JBS3;C9JEJ8;C9JHN6;C9JT62;C9JHS7;C9JK79;C9JHZ8;C9JES8	HDLBP	Vigilin	>sp|Q00341|VIGLN_HUMAN Vigilin OS=Homo sapiens GN=HDLBP PE=1 SV=2;>tr|H0Y394|H0Y394_HUMAN Vigilin (Fragment) OS=Homo sapiens GN=HDLBP PE=1 SV=1;>sp|Q00341-2|VIGLN_HUMAN Isoform 2 of Vigilin OS=Homo sapiens GN=HDLBP	141.45	1.5817e-67	21		1.06724	0.0282626	0.144134	0.841234	10.3	11	11	1.0344	38.357	14	9163300	4667500	4495800	4.9	4	4	0.94529	50.276	3	1450400	698980	751430	8.3	9	9	1.20433	36.828	12	5702400	3098800	2603600	7.4	8	8	1.10167	33.662	11	7652600	4029700	3622900
	624	P63167;Q96FJ2;F8VXL2;F8VRV5	DYNLL1;DYNLL2	Dynein light chain 1, cytoplasmic;Dynein light chain 2, cytoplasmic	>sp|P63167|DYL1_HUMAN Dynein light chain 1, cytoplasmic OS=Homo sapiens GN=DYNLL1 PE=1 SV=1;>sp|Q96FJ2|DYL2_HUMAN Dynein light chain 2, cytoplasmic OS=Homo sapiens GN=DYNLL2 PE=1 SV=1	10.366	1.6422e-10	4		1.06739	0.028323	0.145398	0.837443	9	1	1	1.1917	NaN	1	286680	143070	143610	33.7	3	3	0.92529	79.856	3	1090000	558830	531190	12.4	1	1	1.03751	NaN	1	158530	72730	85800	12.4	1	1	1.13464	NaN	1	928530	494040	434490
	460	P14868;Q68CR9;C9J7S3;C9JLC1;C9JQM9;H7C278;H7BZ35	DARS;DKFZp781B11202	Aspartate--tRNA ligase, cytoplasmic	>sp|P14868|SYDC_HUMAN Aspartate--tRNA ligase, cytoplasmic OS=Homo sapiens GN=DARS PE=1 SV=2;>tr|Q68CR9|Q68CR9_HUMAN Aspartate--tRNA ligase, cytoplasmic OS=Homo sapiens GN=DKFZp781B11202 PE=1 SV=1	57.136	6.9781e-34	7		1.12067	0.0494782	0.14734	0.831679	11.2	5	5	1.0783	17.68	5	2046100	972130	1074000	23.2	9	9	0.93513	17.765	9	4240100	2187800	2052300	6.2	3	3	1.42064	55.453	4	1113000	672700	440330	16.4	7	7	1.10108	11.013	7	4229600	2282500	1947100
	86	C9JLF4;Q9NVH0-2;Q9NVH0	EXD2	Exonuclease 3-5 domain-containing protein 2	>tr|C9JLF4|C9JLF4_HUMAN Exonuclease 3-5 domain-containing protein 2 (Fragment) OS=Homo sapiens GN=EXD2 PE=1 SV=1;>sp|Q9NVH0-2|EXD2_HUMAN Isoform 2 of Exonuclease 3-5 domain-containing protein 2 OS=Homo sapiens GN=EXD2;>sp|Q9NVH0|EXD2_HUMAN Exonuclease	12.421	2.1685e-06	3		1.09809	0.0406375	0.147584	0.830962	11.4	1	1	1.1386	NaN	1	152790	77061	75732	0	0	0			0	0	0	0	11.4	1	1	1.05902	19.285	2	108430	52794	55634	0	0	0			0	0	0	0
	831	Q8NBU5-2;Q8NBU5;B4E2J1	ATAD1	ATPase family AAA domain-containing protein 1	>sp|Q8NBU5-2|ATAD1_HUMAN Isoform 2 of ATPase family AAA domain-containing protein 1 OS=Homo sapiens GN=ATAD1;>sp|Q8NBU5|ATAD1_HUMAN ATPase family AAA domain-containing protein 1 OS=Homo sapiens GN=ATAD1 PE=1 SV=1;>tr|B4E2J1|B4E2J1_HUMAN ATPase family AAA d	32.408	1.1608e-08	3		1.47571	0.169	0.157247	0.803418	7	2	2	1.0049	12.085	2	1159500	548340	611170	11.1	3	3	1.2232	22.112	3	1744200	800950	943270	3.1	1	1			0	0	0	0	3.1	1	1	2.61445	151.93	2	2841900	2064400	777560
	148	P19404;E7EPT4	NDUFV2	NADH dehydrogenase [ubiquinone] flavoprotein 2, mitochondrial	>sp|P19404|NDUV2_HUMAN NADH dehydrogenase [ubiquinone] flavoprotein 2, mitochondrial OS=Homo sapiens GN=NDUFV2 PE=1 SV=2;>tr|E7EPT4|E7EPT4_HUMAN NADH dehydrogenase [ubiquinone] flavoprotein 2, mitochondrial OS=Homo sapiens GN=NDUFV2 PE=1 SV=1	27.391	2.4618e-11	2		1.25944	0.100178	0.157728	0.802092	4	1	1	0.75688	NaN	1	1523500	868030	655480	8.4	2	2	1.1798	15.502	2	4908500	2087400	2821100	13.7	3	3	1.56348	15.935	3	15346000	8976500	6369300	9.2	2	2	1.80213	140.08	2	9151100	5618800	3532300
	708	Q14697;Q14697-2;F5H6X6;E9PKU7;E9PNH1	GANAB	Neutral alpha-glucosidase AB	>sp|Q14697|GANAB_HUMAN Neutral alpha-glucosidase AB OS=Homo sapiens GN=GANAB PE=1 SV=3;>sp|Q14697-2|GANAB_HUMAN Isoform 2 of Neutral alpha-glucosidase AB OS=Homo sapiens GN=GANAB;>tr|F5H6X6|F5H6X6_HUMAN Neutral alpha-glucosidase AB OS=Homo sapiens GN=GANAB	106.87	1.773e-11	5		1.23327	0.0910565	0.157982	0.801393	2.5	2	2	0.83139	NaN	1	239000	151860	87138	2.6	2	2	1.0838	3.3254	2	628530	327900	300620	1	1	1	1.85031	NaN	1	250880	149460	101420	3.6	3	3	1.38748	12.186	4	1362800	826130	536630
	530	P38117;P38117-2;M0QY67	ETFB	Electron transfer flavoprotein subunit beta	>sp|P38117|ETFB_HUMAN Electron transfer flavoprotein subunit beta OS=Homo sapiens GN=ETFB PE=1 SV=3;>sp|P38117-2|ETFB_HUMAN Isoform 2 of Electron transfer flavoprotein subunit beta OS=Homo sapiens GN=ETFB;>tr|M0QY67|M0QY67_HUMAN Electron transfer flavoprot	27.843	0.00027618	3		1.71804	0.235033	0.158638	0.799593	0	0	0			0	0	0	0	4.7	1	1	0.82619	NaN	1	532550	270070	262490	4.7	1	1	3.46693	NaN	1	328090	249020	79069	3.9	1	1	1.77041	NaN	1	388070	269130	118940
	731	Q1KMD3;H3BQZ7	HNRNPUL2;hCG_2044799	Heterogeneous nuclear ribonucleoprotein U-like protein 2	>sp|Q1KMD3|HNRL2_HUMAN Heterogeneous nuclear ribonucleoprotein U-like protein 2 OS=Homo sapiens GN=HNRNPUL2 PE=1 SV=1;>tr|H3BQZ7|H3BQZ7_HUMAN HCG2044799 OS=Homo sapiens GN=HNRNPUL2-BSCL2 PE=4 SV=1	85.104	1.3689e-23	2		1.04206	0.0178943	0.160317	0.795021	2.9	2	2	0.96916	25.114	2	498030	279900	218120	0	0	0			0	0	0	0	9	6	6	1.06661	8.7217	6	2107700	1101500	1006300	7.2	5	5	1.09467	17.804	6	2780000	1370700	1409400
	667	Q08378-2;Q08378;Q08378-4	GOLGA3	Golgin subfamily A member 3	>sp|Q08378-2|GOGA3_HUMAN Isoform 2 of Golgin subfamily A member 3 OS=Homo sapiens GN=GOLGA3;>sp|Q08378|GOGA3_HUMAN Golgin subfamily A member 3 OS=Homo sapiens GN=GOLGA3 PE=1 SV=2;>sp|Q08378-4|GOGA3_HUMAN Isoform 3 of Golgin subfamily A member 3 OS=Homo sap	155.68	2.0786e-19	3		1.28263	0.108102	0.162562	0.788981	2.2	2	2	0.89002	28.467	5	861190	377220	483970	0	0	0			0	0	0	0	1.7	2	2	1.37897	9.732	2	746680	358720	387960	1.7	2	2	1.71931	19.973	4	940100	556100	384000
	155	P62847-2;E7ETK0;P62847-3;P62847;P62847-4	RPS24	40S ribosomal protein S24	>sp|P62847-2|RS24_HUMAN Isoform 2 of 40S ribosomal protein S24 OS=Homo sapiens GN=RPS24;>tr|E7ETK0|E7ETK0_HUMAN 40S ribosomal protein S24 OS=Homo sapiens GN=RPS24 PE=1 SV=1;>sp|P62847-3|RS24_HUMAN Isoform 3 of 40S ribosomal protein S24 OS=Homo sapiens GN=R	15.069	2.6528e-06	5		1.17924	0.0716017	0.16569	0.780704	9.2	1	1	0.98582	NaN	1	846830	409690	437140	9.2	1	1	0.8907	NaN	1	620740	305820	314920	9.2	1	1	1.34257	NaN	1	651410	375170	276250	9.2	1	1	1.64037	68.682	2	1172700	690260	482450
	453	P12956;B1AHC9;B1AHC8;F5H1I8	XRCC6	X-ray repair cross-complementing protein 6	>sp|P12956|XRCC6_HUMAN X-ray repair cross-complementing protein 6 OS=Homo sapiens GN=XRCC6 PE=1 SV=2;>tr|B1AHC9|B1AHC9_HUMAN X-ray repair cross-complementing protein 6 OS=Homo sapiens GN=XRCC6 PE=1 SV=1;>tr|B1AHC8|B1AHC8_HUMAN X-ray repair complementing de	69.842	4.7216e-10	4		1.2179	0.0856122	0.166337	0.77901	0	0	0			0	0	0	0	1.8	1	1	0.89226	NaN	1	508610	265970	242640	1.8	1	1	1.41659	NaN	1	263050	151390	111650	6.4	3	3	1.42922	20.623	3	1976200	1142800	833410
	596	P61247;D6RG13;D6RAT0;F5H4F9;D6RB09;E9PFI5;H0Y8L7;H0Y9Y4;D6RAS7;D6R9B6;D6RED7;D6RI02;D6RGE0	RPS3A	40S ribosomal protein S3a	>sp|P61247|RS3A_HUMAN 40S ribosomal protein S3a OS=Homo sapiens GN=RPS3A PE=1 SV=2;>tr|D6RG13|D6RG13_HUMAN 40S ribosomal protein S3a (Fragment) OS=Homo sapiens GN=RPS3A PE=1 SV=1;>tr|D6RAT0|D6RAT0_HUMAN 40S ribosomal protein S3a OS=Homo sapiens GN=RPS3A PE	29.945	1.8554e-79	13		1.06796	0.0285545	0.166943	0.777431	18.9	5	5	0.93223	81.918	7	4487800	2430400	2057300	43.2	11	11	1.0193	67.815	16	13818000	6328000	7489500	34.1	9	9	1.21582	75.352	11	8902800	5115200	3787600	36	10	10	1.12596	54.511	22	18679000	10062000	8616700
	45	F6RU00;B4DQA8;K7EJC8;E9PCW1;O95249;G5E9T8	GOSR1	Golgi SNAP receptor complex member 1	>tr|F6RU00|F6RU00_HUMAN Golgi SNAP receptor complex member 1 OS=Homo sapiens GN=GOSR1 PE=1 SV=1;>tr|B4DQA8|B4DQA8_HUMAN Golgi SNAP receptor complex member 1 OS=Homo sapiens GN=GOSR1 PE=1 SV=1;>tr|K7EJC8|K7EJC8_HUMAN Golgi SNAP receptor complex member 1 OS=	9.4134	2.0431e-05	6		1.12165	0.049857	0.170787	0.767546	0	0	0			0	0	0	0	13.6	1	1	1.1201	NaN	1	132230	65832	66401	13.6	1	1	0.959693	NaN	1	83444	47898	35546	29.6	2	2	1.31275	63.421	2	1062400	504540	557890
	69	P62820-2;E9PLD0;E7END7;B7Z8M7;Q9H0U4;Q92928;P62820;H0YLJ8;H0YL94;H0YMN7;P62820-3;E7ETK2;H0YNE9;F5GY21;P61026;P51153;Q92930;P61006;B4DEK7;P59190-2;P59190	RAB1B;RAB1A;RAB1C;RAB8B;RAB10;RAB13;RAB8A;RAB15	Ras-related protein Rab-1B;Putative Ras-related protein Rab-1C;Ras-related protein Rab-1A;Ras-related protein Rab-10;Ras-related protein Rab-13;Ras-related protein Rab-8B;Ras-related protein Rab-8A;Ras-related protein Rab-15	>sp|P62820-2|RAB1A_HUMAN Isoform 2 of Ras-related protein Rab-1A OS=Homo sapiens GN=RAB1A;>tr|E9PLD0|E9PLD0_HUMAN Ras-related protein Rab-1B OS=Homo sapiens GN=RAB1B PE=3 SV=1;>tr|E7END7|E7END7_HUMAN Ras-related protein Rab-1A OS=Homo sapiens GN=RAB1A PE=1	15.33	6.7955e-13	21		1.13379	0.0545337	0.171789	0.765004	11.3	1	1	0.97979	NaN	1	281610	136450	145160	19.1	2	2	0.92229	26.62	3	4635300	2442900	2192400	19.1	2	2	1.25117	37.42	3	3637900	2275700	1362200	11.3	1	1	1.46156	NaN	1	423090	243950	179140
	846	Q8WVV4;Q8WVV4-1;Q8WVV4-3	POF1B	Protein POF1B	>sp|Q8WVV4|POF1B_HUMAN Protein POF1B OS=Homo sapiens GN=POF1B PE=1 SV=3;>sp|Q8WVV4-1|POF1B_HUMAN Isoform 1 of Protein POF1B OS=Homo sapiens GN=POF1B	68.064	2.6768e-18	3		2.08466	0.319035	0.173082	0.761749	8.5	4	4	0.63362	NaN	1	1055100	950220	104880	4.2	2	2	4.1051	NaN	1	423450	285950	137500	5.6	3	3	3.48299	67.838	2	575170	545720	29446	4.9	2	2			0	561990	561990	0
	975	Q9NVV4;Q5T851	MTPAP	Poly(A) RNA polymerase, mitochondrial	>sp|Q9NVV4|PAPD1_HUMAN Poly(A) RNA polymerase, mitochondrial OS=Homo sapiens GN=MTPAP PE=1 SV=1	66.171	3.6776e-224	2		1.80039	0.255366	0.17385	0.759825	33.2	14	1	1.2646	NaN	1	283350	153980	129370	32.8	13	0			0	0	0	0	29	12	0			0	0	0	0	31.6	13	1	2.56318	NaN	1	499400	320920	178470
	655	Q01804;Q01804-3;Q01804-5;D6RI06;D6RA27;Q01804-4	OTUD4	OTU domain-containing protein 4	>sp|Q01804|OTUD4_HUMAN OTU domain-containing protein 4 OS=Homo sapiens GN=OTUD4 PE=1 SV=4;>sp|Q01804-3|OTUD4_HUMAN Isoform 3 of OTU domain-containing protein 4 OS=Homo sapiens GN=OTUD4;>sp|Q01804-5|OTUD4_HUMAN Isoform 2 of OTU domain-containing protein 4 O	124.04	0	6		1.08489	0.0353867	0.175429	0.755899	42.3	38	38	0.96245	30.662	90	94339000	47019000	47321000	41.9	39	39	0.95674	23.955	49	96274000	47480000	48794000	40.3	40	40	1.23371	40.696	109	79372000	43260000	36112000	40	39	39	1.21944	38.626	102	126110000	68446000	57666000
	723	Q16531;F5GY55;F5H6C5;F5H775;F5H581;F5H238;Q16531-2;F5GYG8;F5GWI0;F5GZY8;F5H2L3;F5H4N9;F8WF81;F5GZ34;F5H0Y5;F5H7A0	DDB1	DNA damage-binding protein 1	>sp|Q16531|DDB1_HUMAN DNA damage-binding protein 1 OS=Homo sapiens GN=DDB1 PE=1 SV=1;>tr|F5GY55|F5GY55_HUMAN Uncharacterized protein OS=Homo sapiens GN=DDB1 PE=1 SV=1	126.97	2.4779e-49	16		1.02443	0.0104803	0.176694	0.752779	6.8	7	7	0.99541	34.46	11	4399800	2149800	2250000	6.7	6	6	1.0412	28.672	8	3048000	1462100	1585900	10.1	11	11	0.98668	50.142	19	18515000	14962000	3552700	11.5	10	10	1.07698	26.626	14	7031100	3420900	3610100
	1039	Q9Y5B9	SUPT16H	FACT complex subunit SPT16	>sp|Q9Y5B9|SP16H_HUMAN FACT complex subunit SPT16 OS=Homo sapiens GN=SUPT16H PE=1 SV=1	119.91	1.1864e-16	1		1.29588	0.112564	0.183336	0.736753	0	0	0			0	0	0	0	2.1	2	2	0.83564	18.191	2	1332700	747630	585090	4.4	4	4	1.63996	36.764	4	1661900	1035000	626840	3.3	3	3	1.58796	24.077	3	1780100	1173700	606430
	970	Q9NS69	TOMM22	Mitochondrial import receptor subunit TOM22 homolog	>sp|Q9NS69|TOM22_HUMAN Mitochondrial import receptor subunit TOM22 homolog OS=Homo sapiens GN=TOMM22 PE=1 SV=3	15.521	1.302e-92	1		1.1256	0.0513841	0.184989	0.732854	52.1	4	4	0.90181	76.965	4	3518100	1832600	1685500	37.3	3	3	0.9451	14.199	3	1512000	788230	723780	77.5	6	6	1.25941	73.445	6	3327200	1778400	1548800	16.2	2	2	1.49546	57.248	3	1132800	623870	508970
	621	P62913-2;P62913;Q5VVC9;Q5VVC8	RPL11	60S ribosomal protein L11	>sp|P62913-2|RL11_HUMAN Isoform 2 of 60S ribosomal protein L11 OS=Homo sapiens GN=RPL11;>sp|P62913|RL11_HUMAN 60S ribosomal protein L11 OS=Homo sapiens GN=RPL11 PE=1 SV=2;>tr|Q5VVC9|Q5VVC9_HUMAN 60S ribosomal protein L11 (Fragment) OS=Homo sapiens GN=RPL11	20.124	1.3211e-28	4		1.09158	0.0380542	0.185331	0.732052	5.1	1	1	1.1616	NaN	1	1035700	441300	594370	24.9	4	4	0.86262	10.15	4	6951600	3694300	3257300	20.3	3	3	1.30746	49.487	5	10471000	5726700	4744400	5.1	1	1	1.08371	50.963	2	1223900	649450	574450
	561	P49748-2;P49748;P49748-3;G3V1M7;J3QRJ8;J3KSR4	ACADVL	Very long-chain specific acyl-CoA dehydrogenase, mitochondrial	>sp|P49748-2|ACADV_HUMAN Isoform 2 of Very long-chain specific acyl-CoA dehydrogenase, mitochondrial OS=Homo sapiens GN=ACADVL;>sp|P49748|ACADV_HUMAN Very long-chain specific acyl-CoA dehydrogenase, mitochondrial OS=Homo sapiens GN=ACADVL PE=1 SV=1;>sp|P49	68.058	3.4482e-15	6		1.13818	0.0562104	0.18904	0.723447	1.6	1	1	0.87934	NaN	1	458780	224840	233940	8.7	4	4	1.0323	7.4211	5	3873900	2037300	1836600	3.9	2	2	1.54038	16.741	3	426990	261330	165650	5.1	2	2	1.20019	51.178	3	1255200	785030	470170
	499	P27797	CALR	Calreticulin	>sp|P27797|CALR_HUMAN Calreticulin OS=Homo sapiens GN=CALR PE=1 SV=1	48.141	1.6295e-07	1		1.2444	0.094959	0.191002	0.718962	0	0	0			0	0	0	0	0	0	0			0	0	0	0	3.1	1	1	1.43567	NaN	1	122950	69824	53126	3.1	1	1	1.07861	NaN	1	223750	114420	109340
	436	P10599-2;P10599	TXN	Thioredoxin	>sp|P10599-2|THIO_HUMAN Isoform 2 of Thioredoxin OS=Homo sapiens GN=TXN;>sp|P10599|THIO_HUMAN Thioredoxin OS=Homo sapiens GN=TXN PE=1 SV=3	9.4519	2.3446e-05	2		2.39381	0.37909	0.193575	0.713151	28.2	2	2	0.48628	NaN	1	750650	656040	94608	0	0	0			0	0	0	0	15.3	1	1	6.03355	NaN	1	205230	187420	17807	12.9	1	1	4.6753	NaN	1	1041100	865350	175710
	991	Q9NZI8;Q9NZI8-2;REV__M0QZ54;REV__M0R118	IGF2BP1	Insulin-like growth factor 2 mRNA-binding protein 1	>sp|Q9NZI8|IF2B1_HUMAN Insulin-like growth factor 2 mRNA-binding protein 1 OS=Homo sapiens GN=IGF2BP1 PE=1 SV=2;>sp|Q9NZI8-2|IF2B1_HUMAN Isoform 2 of Insulin-like growth factor 2 mRNA-binding protein 1 OS=Homo sapiens GN=IGF2BP1	63.48	0	4		1.03351	0.014314	0.195501	0.708851	51	33	31	0.98299	40.387	144	969070000	475580000	493490000	50.4	32	30	0.96901	28.249	143	2588300000	1279000000	1309300000	56	34	30	1.11116	42.924	141	953450000	486030000	467420000	47.8	28	26	1.07796	41.988	129	1566100000	797120000	769010000
	486	P22735;B4DWR7;H0YMQ8;H0YN27;H0YLT9	TGM1	Protein-glutamine gamma-glutamyltransferase K	>sp|P22735|TGM1_HUMAN Protein-glutamine gamma-glutamyltransferase K OS=Homo sapiens GN=TGM1 PE=1 SV=4;>tr|B4DWR7|B4DWR7_HUMAN Protein-glutamine gamma-glutamyltransferase K OS=Homo sapiens GN=TGM1 PE=2 SV=1	89.786	7.1659e-39	5		2.18081	0.338618	0.195976	0.707798	13.3	8	8			0	2546500	2546500	0	12.4	7	7	0.5525	85.297	3	4483300	3213100	1270300	10.3	6	6	6.28654	NaN	1	1340200	1277500	62733	14.3	9	9	2.98614	58.406	5	5517200	5093200	424070
	605	P62263;H0YB22;E5RH77	RPS14	40S ribosomal protein S14	>sp|P62263|RS14_HUMAN 40S ribosomal protein S14 OS=Homo sapiens GN=RPS14 PE=1 SV=3;>tr|H0YB22|H0YB22_HUMAN 40S ribosomal protein S14 (Fragment) OS=Homo sapiens GN=RPS14 PE=1 SV=1;>tr|E5RH77|E5RH77_HUMAN 40S ribosomal protein S14 OS=Homo sapiens GN=RPS14 PE	16.273	2.6987e-21	3		1.08047	0.0336117	0.197398	0.704657	6.6	1	1	1.0061	NaN	1	431090	161450	269640	24.5	5	5	0.91629	85.361	4	8652600	2717800	5934800	23.2	4	4	1.24445	53.963	4	2851300	1512000	1339400	23.2	4	4	1.18794	94.688	4	6287100	3378100	2909000
	6	A3KMH1-3;A3KMH1;A3KMH1-2	VWA8	von Willebrand factor A domain-containing protein 8	>sp|A3KMH1-3|VWA8_HUMAN Isoform 3 of von Willebrand factor A domain-containing protein 8 OS=Homo sapiens GN=VWA8;>sp|A3KMH1|VWA8_HUMAN von Willebrand factor A domain-containing protein 8 OS=Homo sapiens GN=VWA8 PE=1 SV=2;>sp|A3KMH1-2|VWA8_HUMAN Isoform 2 o	210.92	0	3		1.0935	0.038818	0.197632	0.704142	42.6	64	64	0.92329	20.571	69	77828000	40134000	37694000	40.5	63	63	0.9303	33.118	65	67028000	34600000	32427000	41.7	63	63	1.28258	18.148	65	52101000	29213000	22888000	40.9	61	61	1.29786	26.036	67	79353000	44403000	34951000
	601	Q5T6W5;P61978-3;P61978;P61978-2;Q5T6W2;Q5T6W1;S4R457;S4R359	HNRNPK	Heterogeneous nuclear ribonucleoprotein K	>tr|Q5T6W5|Q5T6W5_HUMAN Heterogeneous nuclear ribonucleoprotein K OS=Homo sapiens GN=HNRNPK PE=1 SV=1;>sp|P61978-3|HNRPK_HUMAN Isoform 3 of Heterogeneous nuclear ribonucleoprotein K OS=Homo sapiens GN=HNRNPK;>sp|P61978|HNRPK_HUMAN Heterogeneous nuclear rib	47.557	0	8		1.1302	0.0531541	0.199185	0.700744	54.4	23	23	0.9066	27.851	85	262860000	134800000	128050000	51.2	20	20	0.90494	22.933	89	306100000	155500000	150600000	54	22	22	1.4256	31.398	90	199490000	113120000	86378000	51.6	21	21	1.39503	26.476	86	358880000	202330000	156550000
	269	J3KR24;P41252;Q5TCC4;Q5TCC5;Q5TCC6;Q5TCD2	IARS	Isoleucine--tRNA ligase, cytoplasmic	>tr|J3KR24|J3KR24_HUMAN Isoleucine--tRNA ligase, cytoplasmic OS=Homo sapiens GN=IARS PE=1 SV=1;>sp|P41252|SYIC_HUMAN Isoleucine--tRNA ligase, cytoplasmic OS=Homo sapiens GN=IARS PE=1 SV=2;>tr|Q5TCC4|Q5TCC4_HUMAN Isoleucine--tRNA ligase, cytoplasmic (Fragme	131.76	5.9897e-07	6		1.89498	0.277606	0.20496	0.68833	2.1	2	2	0.71147	0.35208	2	483020	274170	208850	0	0	0			0	0	0	0	0.8	1	1	5.94813	NaN	1	159680	105660	54015	1.1	1	1	1.60798	NaN	1	266060	150590	115480
	781	Q6ZVX7	NCCRP1	F-box only protein 50	>sp|Q6ZVX7|FBX50_HUMAN F-box only protein 50 OS=Homo sapiens GN=NCCRP1 PE=1 SV=1	30.847	5.3762e-09	1		2.25923	0.35396	0.211196	0.675314	8.4	2	2	0.44696	NaN	1	783180	688660	94511	4	1	1			0	147440	147440	0	8.4	2	2	5.74581	NaN	1	540690	503650	37034	8.4	2	2	4.49014	204.59	3	1913900	1402400	511480
	72	B8ZZJ1;Q9BYI3;B8ZZA2;H7C0W7	FAM126A	Hyccin	>tr|B8ZZJ1|B8ZZJ1_HUMAN Uncharacterized protein OS=Homo sapiens GN=FAM126A PE=4 SV=1;>sp|Q9BYI3|HYCCI_HUMAN Hyccin OS=Homo sapiens GN=FAM126A PE=1 SV=2;>tr|B8ZZA2|B8ZZA2_HUMAN Hyccin OS=Homo sapiens GN=FAM126A PE=4 SV=1;>tr|H7C0W7|H7C0W7_HUMAN Hyccin (Frag	46.919	4.5291e-06	4		2.41353	0.382653	0.217818	0.661907	0	0	0			0	0	0	0	2.9	1	1	4.9365	NaN	1	9837000	1192900	8644100	2.6	1	1	1.18001	NaN	1	183850	87735	96112	0	0	0			0	0	0	0
	806	Q8IUD2-3;Q8IUD2;X6RLX0;K7EPD6;Q8IUD2-5;Q8IUD2-2;G8JLD3;Q8IUD2-4;X6RM00	ERC1	ELKS/Rab6-interacting/CAST family member 1	>sp|Q8IUD2-3|RB6I2_HUMAN Isoform 3 of ELKS/Rab6-interacting/CAST family member 1 OS=Homo sapiens GN=ERC1;>sp|Q8IUD2|RB6I2_HUMAN ELKS/Rab6-interacting/CAST family member 1 OS=Homo sapiens GN=ERC1 PE=1 SV=1;>tr|X6RLX0|X6RLX0_HUMAN ELKS/Rab6-interacting/CAST	124.9	1.0493e-16	9		6.38405	0.805096	0.22442	0.648939	2.7	3	3	1.3304	NaN	1	520590	16261	504330	1	1	1			0	93922	0	93922	5.9	5	5	30.6344	81.739	2	939500	933910	5590	0	0	0			0	0	0	0
	1010	Q9UI09;H0YID5;Q9UI09-2;F8VRD8;H0YIT1;F8VXI1	NDUFA12	NADH dehydrogenase [ubiquinone] 1 alpha subcomplex subunit 12	>sp|Q9UI09|NDUAC_HUMAN NADH dehydrogenase [ubiquinone] 1 alpha subcomplex subunit 12 OS=Homo sapiens GN=NDUFA12 PE=1 SV=1;>tr|H0YID5|H0YID5_HUMAN NADH dehydrogenase [ubiquinone] 1 alpha subcomplex subunit 12 (Fragment) OS=Homo sapiens GN=NDUFA12 PE=1 SV=1;	17.114	1.0645e-64	6		1.20218	0.0799705	0.22745	0.643115	24.1	2	2	0.72323	204.23	2	2981700	1866800	1115000	20	2	2	1.005	57.001	2	1667000	838650	828400	8.3	1	1	1.89143	37.454	2	1025900	617030	408890	26.2	3	3	1.51932	63.963	4	3552500	2183400	1369000
	746	Q5ST30-3;Q5ST30;Q5ST30-4;Q5ST30-2	VARS2	Valine--tRNA ligase, mitochondrial	>sp|Q5ST30-3|SYVM_HUMAN Isoform 3 of Valine--tRNA ligase, mitochondrial OS=Homo sapiens GN=VARS2;>sp|Q5ST30|SYVM_HUMAN Valine--tRNA ligase, mitochondrial OS=Homo sapiens GN=VARS2 PE=1 SV=2;>sp|Q5ST30-4|SYVM_HUMAN Isoform 4 of Valine--tRNA ligase, mitochond	102.41	1.2237e-07	4		1.84788	0.266674	0.232198	0.634141	4	3	3	1.4485	117.45	4	1657100	704520	952560	1.1	1	1	0.26507	46.478	2	1015900	642640	373270	2.9	2	2	7.24218	NaN	1	555700	518970	36732	4	3	3	4.19322	NaN	1	212910	178050	34866
	613	P62633-7;P62633-3;P62633-2;P62633-8;P62633-5;P62633;P62633-4;P62633-6	CNBP	Cellular nucleic acid-binding protein	>sp|P62633-7|CNBP_HUMAN Isoform 7 of Cellular nucleic acid-binding protein OS=Homo sapiens GN=CNBP;>sp|P62633-3|CNBP_HUMAN Isoform 3 of Cellular nucleic acid-binding protein OS=Homo sapiens GN=CNBP;>sp|P62633-2|CNBP_HUMAN Isoform 2 of Cellular nucleic acid	17.692	2.4744e-08	8		1.63367	0.213166	0.234485	0.629885	9.4	1	1	1.0394	NaN	1	239890	112390	127500	0	0	0			0	0	0	0	15.6	2	2	2.56772	84.949	2	383520	244760	138760	0	0	0			0	0	0	0
	13	A6NLM8;P51571	SSR4	Translocon-associated protein subunit delta	>tr|A6NLM8|A6NLM8_HUMAN Translocon-associated protein subunit delta OS=Homo sapiens GN=SSR4 PE=1 SV=1;>sp|P51571|SSRD_HUMAN Translocon-associated protein subunit delta OS=Homo sapiens GN=SSR4 PE=1 SV=1	16.245	1.7419e-19	2		1.11361	0.046732	0.238032	0.623365	0	0	0			0	0	0	0	20.3	2	2	0.94332	8.8044	2	2503700	1215600	1288100	20.3	2	2	1.04505	27.269	2	887270	483790	403480	19.6	2	2	1.40087	15.278	2	1601500	940120	661430
	895	Q96TC7;H0YLG5;H0YNE5;H0YMB1;Q96TC7-2	RMDN3	Regulator of microtubule dynamics protein 3	>sp|Q96TC7|RMD3_HUMAN Regulator of microtubule dynamics protein 3 OS=Homo sapiens GN=RMDN3 PE=1 SV=2;>tr|H0YLG5|H0YLG5_HUMAN Regulator of microtubule dynamics protein 3 (Fragment) OS=Homo sapiens GN=RMDN3 PE=1 SV=1;>tr|H0YNE5|H0YNE5_HUMAN Regulator of micr	52.118	7.5394e-28	5		1.0998	0.0413136	0.239079	0.621459	10.4	4	4	0.86497	20.167	8	3442900	1794800	1648100	13	4	4	0.94318	10.396	5	3353200	1767800	1585400	10.6	4	4	1.3552	22.257	7	1858800	1050100	808710	10.2	4	4	1.32329	9.5921	6	3187100	1744800	1442300
	448	P12235;V9GYG0	SLC25A4	ADP/ATP translocase 1	>sp|P12235|ADT1_HUMAN ADP/ATP translocase 1 OS=Homo sapiens GN=SLC25A4 PE=1 SV=4;>tr|V9GYG0|V9GYG0_HUMAN ADP/ATP translocase 1 OS=Homo sapiens GN=SLC25A4 PE=1 SV=1	33.064	2.7492e-54	2		1.81299	0.258395	0.239618	0.620481	22.8	7	0			0	0	0	0	30.5	8	3	0.4557	287.98	2	5084100	4297900	786140	26.2	7	2	4.0715	51.95	2	848400	681200	167190	27.5	7	2	3.21182	24.23	2	1123100	798390	324740
	270	J3KRG2;Q96QA5	GSDMA	Gasdermin-A	>tr|J3KRG2|J3KRG2_HUMAN Gasdermin-A (Fragment) OS=Homo sapiens GN=GSDMA PE=1 SV=2;>sp|Q96QA5|GSDMA_HUMAN Gasdermin-A OS=Homo sapiens GN=GSDMA PE=1 SV=4	17.791	4.0597e-12	2		2.97719	0.473806	0.239624	0.62047	5.1	1	1			0	246370	246370	0	0	0	0			0	0	0	0	10.8	2	2	8.26651	NaN	1	468640	450600	18043	20.3	5	5	1.07224	NaN	1	1623900	1342100	281830
	837	Q8NHP8;Q8NHP8-2	PLBD2	Putative phospholipase B-like 2;Putative phospholipase B-like 2 32 kDa form;Putative phospholipase B-like 2 45 kDa form	>sp|Q8NHP8|PLBL2_HUMAN Putative phospholipase B-like 2 OS=Homo sapiens GN=PLBD2 PE=1 SV=2;>sp|Q8NHP8-2|PLBL2_HUMAN Isoform 2 of Putative phospholipase B-like 2 OS=Homo sapiens GN=PLBD2	65.471	1.3405e-41	2		1.1086	0.0447732	0.242873	0.61462	8.1	4	4	0.87759	44.888	3	3420700	1821800	1598900	6.8	3	3	0.92129	95.258	3	6416600	3505600	2911000	6.8	3	3	1.3836	71.331	4	3146600	1793900	1352700	8.1	4	4	1.35018	80.997	6	5124500	2851800	2272700
	661	Q06830	PRDX1	Peroxiredoxin-1	>sp|Q06830|PRDX1_HUMAN Peroxiredoxin-1 OS=Homo sapiens GN=PRDX1 PE=1 SV=1	22.11	6.5904e-19	1		1.1241	0.0508034	0.247031	0.607248	11.6	2	0			0	0	0	0	26.1	5	3	0.84517	76.383	4	5365700	2834100	2531700	26.1	6	3	1.26461	2.4302	3	2931300	1682500	1248800	21.1	5	2	1.32896	33.566	3	3256800	1930900	1325900
	222	G5EA52;P30101	PDIA3	Protein disulfide-isomerase A3	>tr|G5EA52|G5EA52_HUMAN Protein disulfide-isomerase OS=Homo sapiens GN=PDIA3 PE=1 SV=1;>sp|P30101|PDIA3_HUMAN Protein disulfide-isomerase A3 OS=Homo sapiens GN=PDIA3 PE=1 SV=4	54.963	2.0349e-46	2		1.04872	0.020658	0.248965	0.603862	11.3	5	3	0.88931	13.503	3	1383900	671200	712670	21.2	9	7	1.0174	14.066	7	3097300	1544500	1552800	16.5	7	6	1.23324	37.208	6	1631100	886460	744660	23.3	10	8	1.08402	48.455	9	4302600	2277600	2025000
	769	Q6P9A2;Q6P9A2-2	GALNT18	Polypeptide N-acetylgalactosaminyltransferase 18	>sp|Q6P9A2|GLT18_HUMAN Polypeptide N-acetylgalactosaminyltransferase 18 OS=Homo sapiens GN=GALNT18 PE=2 SV=2	69.56	5.8814e-192	2		1.02693	0.0115398	0.252129	0.598377	30	15	15	0.95926	52.761	43	54142000	20047000	34095000	25.9	14	14	0.96783	51.753	49	53988000	24837000	29152000	30.1	16	16	1.0782	55.461	57	49413000	24076000	25337000	27.3	14	14	1.11102	71.57	50	92700000	33667000	59032000
	253	I3L0N3;P46459;B4DFA2;I3L2G1;I3L0L3;K7EQD6;I3L338;I3L4Q9	NSF	Vesicle-fusing ATPase	>tr|I3L0N3|I3L0N3_HUMAN Vesicle-fusing ATPase OS=Homo sapiens GN=NSF PE=1 SV=1;>sp|P46459|NSF_HUMAN Vesicle-fusing ATPase OS=Homo sapiens GN=NSF PE=1 SV=3;>tr|B4DFA2|B4DFA2_HUMAN Vesicle-fusing ATPase OS=Homo sapiens GN=NSF PE=1 SV=1	82.091	3.3591e-228	8		1.07029	0.0295029	0.252277	0.598122	39.9	26	26	0.91877	18.375	60	47762000	24447000	23314000	36.9	25	25	0.9404	62.371	68	98842000	46141000	52700000	36.7	25	25	1.2528	33.11	50	38240000	20626000	17615000	40.7	28	28	1.2123	61.712	58	134020000	86530000	47494000
	741	Q5JRA6;Q5JRA6-2;G8JLC6;Q5JRA6-4;Q5JRA6-3	MIA3	Melanoma inhibitory activity protein 3	>sp|Q5JRA6|MIA3_HUMAN Melanoma inhibitory activity protein 3 OS=Homo sapiens GN=MIA3 PE=1 SV=1;>sp|Q5JRA6-2|MIA3_HUMAN Isoform 2 of Melanoma inhibitory activity protein 3 OS=Homo sapiens GN=MIA3;>tr|G8JLC6|G8JLC6_HUMAN Melanoma inhibitory activity protein	213.7	3.8367e-60	5		1.06764	0.0284253	0.254711	0.593952	8.5	12	12	0.94574	16.701	18	5431400	2653200	2778200	1.9	3	3	0.89435	11.061	3	1004600	548410	456230	4.5	7	7	1.27201	91.042	11	3877100	2839600	1037500	6.9	11	11	1.20763	20.86	17	6415300	3474200	2941100
	597	P61254;J3QRI7;J3QQQ9;J3QQV1;J3QRC4;J3KTJ8;E5RIT6;Q9UNX3;J3KS10;J3KSS0;E5RHH1	RPL26;KRBA2;RPL26L1	60S ribosomal protein L26;60S ribosomal protein L26-like 1	>sp|P61254|RL26_HUMAN 60S ribosomal protein L26 OS=Homo sapiens GN=RPL26 PE=1 SV=1;>tr|J3QRI7|J3QRI7_HUMAN 60S ribosomal protein L26 (Fragment) OS=Homo sapiens GN=RPL26 PE=4 SV=1;>tr|J3QQQ9|J3QQQ9_HUMAN KRAB-A domain-containing protein 2 OS=Homo sapiens GN	17.258	3.4248e-28	11		1.0758	0.0317314	0.255869	0.591983	26.9	4	4	0.95673	96.306	4	3983200	1978100	2005100	33.1	5	5	0.92173	134.14	6	5851400	2989800	2861700	32.4	6	6	1.37001	65.849	6	7963600	4228400	3735200	33.8	5	5	1.10868	59.43	7	5181200	2833400	2347800
	632	Q5TA02;P78417-3;P78417;Q5TA01;P78417-2	GSTO1	Glutathione S-transferase omega-1	>tr|Q5TA02|Q5TA02_HUMAN Glutathione S-transferase omega-1 (Fragment) OS=Homo sapiens GN=GSTO1 PE=1 SV=1;>sp|P78417-3|GSTO1_HUMAN Isoform 3 of Glutathione S-transferase omega-1 OS=Homo sapiens GN=GSTO1;>sp|P78417|GSTO1_HUMAN Glutathione S-transferase omega-	23.341	8.7208e-12	5		1.24205	0.0941379	0.257805	0.588708	4.5	1	1	0.9611	NaN	1	750360	438590	311770	14.5	3	3	0.62991	107.04	4	3255500	2030700	1224800	10	2	2	2.4296	82.303	2	2695200	2308000	387210	10	2	2	1.61797	61.124	2	4700600	3670000	1030600
	807	Q8IV08;M0QZI4;M0R3G9;M0R2W7;M0R1F7	PLD3	Phospholipase D3	>sp|Q8IV08|PLD3_HUMAN Phospholipase D3 OS=Homo sapiens GN=PLD3 PE=1 SV=1;>tr|M0QZI4|M0QZI4_HUMAN Phospholipase D3 (Fragment) OS=Homo sapiens GN=PLD3 PE=1 SV=1	54.705	5.3553e-14	5		1.05674	0.0239681	0.2646	0.57741	5.7	3	3	0.92276	17.823	3	1010600	536770	473800	6.1	3	3	0.92243	2.3558	4	1514200	810600	703640	6.3	3	3	1.1659	14.421	3	1002700	525060	477680	10.2	5	5	1.25658	24.744	6	2572600	1467900	1104700
	272	J3KSR8;Q07955;J3KTL2	SRSF1	Serine/arginine-rich splicing factor 1	>tr|J3KSR8|J3KSR8_HUMAN Serine/arginine-rich-splicing factor 1 (Fragment) OS=Homo sapiens GN=SRSF1 PE=1 SV=1;>sp|Q07955|SRSF1_HUMAN Serine/arginine-rich splicing factor 1 OS=Homo sapiens GN=SRSF1 PE=1 SV=2;>tr|J3KTL2|J3KTL2_HUMAN Serine/arginine-rich-splic	16.34	8.2629e-05	3		1.21673	0.0851927	0.267666	0.572407	0	0	0			0	0	0	0	0	0	0			0	0	0	0	7	1	1	1.51876	NaN	1	424680	235120	189560	7	1	1	0.974754	NaN	1	406360	192580	213780
	189	F5GY99;Q10472	GALNT1	Polypeptide N-acetylgalactosaminyltransferase 1;Polypeptide N-acetylgalactosaminyltransferase 1 soluble form	>tr|F5GY99|F5GY99_HUMAN Polypeptide N-acetylgalactosaminyltransferase 1 soluble form OS=Homo sapiens GN=GALNT1 PE=1 SV=1;>sp|Q10472|GALT1_HUMAN Polypeptide N-acetylgalactosaminyltransferase 1 OS=Homo sapiens GN=GALNT1 PE=1 SV=1	57.379	0.00062244	2		2.49086	0.396349	0.268925	0.570369	1.8	1	1	0.901	NaN	1	1443900	608060	835800	0	0	0			0	0	0	0	2.8	1	1	6.8861	NaN	1	681950	575470	106480	0	0	0			0	0	0	0
	363	S4R3I5;O95167	NDUFA3	NADH dehydrogenase [ubiquinone] 1 alpha subcomplex subunit 3	>tr|S4R3I5|S4R3I5_HUMAN NADH dehydrogenase (Ubiquinone) 1 alpha subcomplex, 3, 9kDa, isoform CRA_b OS=Homo sapiens GN=NDUFA3 PE=1 SV=1;>sp|O95167|NDUA3_HUMAN NADH dehydrogenase [ubiquinone] 1 alpha subcomplex subunit 3 OS=Homo sapiens GN=NDUFA3 PE=1 SV=1	4.6462	0.0012462	2		1.40348	0.147205	0.269868	0.568848	0	0	0			0	0	0	0	26.8	1	1	0.9466	NaN	1	835930	387210	448720	0	0	0			0	0	0	0	26.8	1	1	2.08086	NaN	1	1248400	842730	405640
	16	A8MUD9;P18124	RPL7	60S ribosomal protein L7	>tr|A8MUD9|A8MUD9_HUMAN 60S ribosomal protein L7 OS=Homo sapiens GN=RPL7 PE=1 SV=1;>sp|P18124|RL7_HUMAN 60S ribosomal protein L7 OS=Homo sapiens GN=RPL7 PE=1 SV=1	24.433	1.7592e-07	2		1.09632	0.0399358	0.271449	0.566312	21.2	3	3	0.80485	8.0808	2	955820	460270	495550	5.3	1	1	0.9622	NaN	1	870200	522400	347810	12	2	2	1.47117	101.85	2	849610	416960	432660	14.4	2	2	1.26794	NaN	1	332020	193680	138340
	287	K7ENG2;P26368-2;P26368	U2AF2	Splicing factor U2AF 65 kDa subunit	>tr|K7ENG2|K7ENG2_HUMAN Splicing factor U2AF 65 kDa subunit OS=Homo sapiens GN=U2AF2 PE=1 SV=1;>sp|P26368-2|U2AF2_HUMAN Isoform 2 of Splicing factor U2AF 65 kDa subunit OS=Homo sapiens GN=U2AF2;>sp|P26368|U2AF2_HUMAN Splicing factor U2AF 65 kDa subunit OS=	33.901	5.4648e-30	3		1.0323	0.0138071	0.273545	0.562972	7.5	3	3	0.96861	23.671	3	668130	345540	322580	0	0	0			0	0	0	0	24.4	6	6	1.12656	12.676	6	1495500	780220	715270	19.2	5	5	1.00814	19.44	5	1863000	890700	972310
	575	P52597	HNRNPF	Heterogeneous nuclear ribonucleoprotein F;Heterogeneous nuclear ribonucleoprotein F, N-terminally processed	>sp|P52597|HNRPF_HUMAN Heterogeneous nuclear ribonucleoprotein F OS=Homo sapiens GN=HNRNPF PE=1 SV=3	45.671	5.2476e-73	1		1.19571	0.0776256	0.277319	0.55702	6.5	2	0			0	0	0	0	10.6	3	1	0.71986	NaN	1	1149400	697760	451630	10.6	3	1	1.72566	NaN	1	300260	199250	101010	10.6	3	1	1.37618	NaN	1	872660	540210	332440
	932	Q9GZT8-2;Q9GZT8;E7EXA3;Q9GZT8-3;B8ZZI0;C9JN42;H7C1A8	NIF3L1	NIF3-like protein 1	>sp|Q9GZT8-2|GTPC1_HUMAN Isoform 2 of Putative GTP cyclohydrolase 1 type 2 NIF3L1 OS=Homo sapiens GN=NIF3L1;>sp|Q9GZT8|GTPC1_HUMAN Putative GTP cyclohydrolase 1 type 2 NIF3L1 OS=Homo sapiens GN=NIF3L1 PE=1 SV=2;>tr|E7EXA3|E7EXA3_HUMAN Putative GTP cyclohyd	38.983	1.513e-43	7		1.05536	0.0233993	0.278039	0.555895	26	7	7	0.89626	146.33	7	9230000	5489000	3741000	21.1	6	6	0.98346	43.909	7	11627000	5536000	6090800	34	9	9	1.21244	63.639	9	7182900	4062400	3120600	27.4	7	7	1.16077	66.555	8	8473400	4447400	4026000
	17	P62750;H7BY10;K7EJV9;K7ERT8;A8MUS3;K7EMA7	RPL23A	60S ribosomal protein L23a	>sp|P62750|RL23A_HUMAN 60S ribosomal protein L23a OS=Homo sapiens GN=RPL23A PE=1 SV=1;>tr|H7BY10|H7BY10_HUMAN 60S ribosomal protein L23a (Fragment) OS=Homo sapiens GN=RPL23A PE=1 SV=1;>tr|K7EJV9|K7EJV9_HUMAN 60S ribosomal protein L23a (Fragment) OS=Homo sa	17.695	2.6455e-69	6		1.06387	0.0268878	0.279807	0.553141	0	0	0			0	0	0	0	37.8	8	8	0.93575	88.68	11	11655000	5889400	5766100	43.6	9	9	1.2696	102.39	18	35334000	18937000	16397000	14.1	2	2	1.01353	109.99	5	5151400	2670800	2480500
	213	Q9Y6M1-1;Q9Y6M1;F8W930;Q9Y6M1-5;Q9Y6M1-6;Q9Y6M1-3;Q9Y6M1-4	IGF2BP2	Insulin-like growth factor 2 mRNA-binding protein 2	>sp|Q9Y6M1-1|IF2B2_HUMAN Isoform 2 of Insulin-like growth factor 2 mRNA-binding protein 2 OS=Homo sapiens GN=IGF2BP2;>sp|Q9Y6M1|IF2B2_HUMAN Insulin-like growth factor 2 mRNA-binding protein 2 OS=Homo sapiens GN=IGF2BP2 PE=1 SV=2;>tr|F8W930|F8W930_HUMAN Ins	61.842	0	7		1.04068	0.0173165	0.284885	0.54533	50.5	26	24	0.93476	14.5	48	139620000	71386000	68234000	47.8	25	23	0.93746	39.727	49	322830000	162900000	159930000	48.9	26	24	1.15073	24.358	51	133550000	70786000	62759000	43.7	21	19	1.16316	32.352	44	182320000	95874000	86443000
	527	P35908	KRT2	Keratin, type II cytoskeletal 2 epidermal	>sp|P35908|K22E_HUMAN Keratin, type II cytoskeletal 2 epidermal OS=Homo sapiens GN=KRT2 PE=1 SV=2	65.432	0	1		2.53884	0.404635	0.290445	0.536936	79.2	60	1	0.1256	125.7	4	24639000	24388000	250830	85.8	60	1	0.30448	97.792	10	42004000	39893000	2110700	84.2	63	1	18.5515	142.66	10	53382000	51857000	1524500	88.7	66	1	58.5617	140.39	8	149710000	148290000	1427900
	541	P42677;Q5T4L4;Q71UM5;H0YMV8;C9J1C5;C9JLI6	RPS27;RPS27L	40S ribosomal protein S27;40S ribosomal protein S27-like	>sp|P42677|RS27_HUMAN 40S ribosomal protein S27 OS=Homo sapiens GN=RPS27 PE=1 SV=3;>tr|Q5T4L4|Q5T4L4_HUMAN 40S ribosomal protein S27 OS=Homo sapiens GN=RPS27 PE=1 SV=1;>sp|Q71UM5|RS27L_HUMAN 40S ribosomal protein S27-like OS=Homo sapiens GN=RPS27L PE=1 SV=	9.461	1.9627e-10	6		1.06135	0.0258579	0.297452	0.526583	0	0	0			0	0	0	0	15.5	2	2	0.93824	34.065	2	1167400	575480	591880	15.5	1	1	1.28675	NaN	1	292330	154520	137800	38.1	3	3	0.990295	43.358	5	2228300	1055600	1172700
	698	Q14011;K7EQX4;K7ENN6;K7EIF7;K7ELV6;K7EQL0;K7ENX8;K7EJV5;K7ELT6;K7EMY9;K7EPM4;K7ER40;K7EQR7;B4E2X2;D6W5Y5	CIRBP	Cold-inducible RNA-binding protein	>sp|Q14011|CIRBP_HUMAN Cold-inducible RNA-binding protein OS=Homo sapiens GN=CIRBP PE=1 SV=1;>tr|K7EQX4|K7EQX4_HUMAN Cold-inducible RNA-binding protein (Fragment) OS=Homo sapiens GN=CIRBP PE=4 SV=1;>tr|K7ENN6|K7ENN6_HUMAN Cold-inducible RNA-binding protein	18.648	1.0891e-18	15		2.21116	0.344621	0.300047	0.52281	0	0	0			0	0	0	0	18.6	2	2	0.73588	NaN	1	107820	72338	35482	12.2	1	1	6.64408	NaN	1	93447	85141	8306.4	0	0	0			0	0	0	0
	619	P62857	RPS28	40S ribosomal protein S28	>sp|P62857|RS28_HUMAN 40S ribosomal protein S28 OS=Homo sapiens GN=RPS28 PE=1 SV=1	7.8409	4.3392e-09	1		1.05954	0.025119	0.306199	0.513996	0	0	0			0	0	0	0	17.4	1	1	0.86481	NaN	1	3410100	1671800	1738200	17.4	1	1	1.1154	NaN	1	1631200	862730	768460	17.4	1	1	1.23312	10.425	2	5831100	3189300	2641800
	936	Q9H0U3	MAGT1	Magnesium transporter protein 1	>sp|Q9H0U3|MAGT1_HUMAN Magnesium transporter protein 1 OS=Homo sapiens GN=MAGT1 PE=1 SV=1	38.036	1.0911e-05	1		1.04751	0.0201583	0.311171	0.507001	5.7	2	2	0.90112	NaN	1	736240	389990	346250	5.7	2	2	0.98357	89.857	2	1110600	542210	568360	5.7	2	2	1.25404	100.81	2	814180	451200	362980	5.7	2	2	1.08326	41.778	2	1058900	550580	508310
	358	O94874-2;O94874;O94874-3	UFL1	E3 UFM1-protein ligase 1	>sp|O94874-2|UFL1_HUMAN Isoform 2 of E3 UFM1-protein ligase 1 OS=Homo sapiens GN=UFL1;>sp|O94874|UFL1_HUMAN E3 UFM1-protein ligase 1 OS=Homo sapiens GN=UFL1 PE=1 SV=2	82.097	3.6451e-13	3		1.09953	0.041206	0.312833	0.504687	0	0	0			0	0	0	0	0	0	0			0	0	0	0	4.1	2	2	1.25272	40.829	2	125630	62550	63083	3.8	2	2	0.965065	9.2696	2	571440	273570	297880
	352	O75643;B4E0P5;O75643-2;C9JAQ9	SNRNP200	U5 small nuclear ribonucleoprotein 200 kDa helicase	>sp|O75643|U520_HUMAN U5 small nuclear ribonucleoprotein 200 kDa helicase OS=Homo sapiens GN=SNRNP200 PE=1 SV=2;>tr|B4E0P5|B4E0P5_HUMAN U5 small nuclear ribonucleoprotein 200 kDa helicase OS=Homo sapiens GN=SNRNP200 PE=1 SV=1;>sp|O75643-2|U520_HUMAN Isofor	244.5	7.0098e-10	4		1.04733	0.0200829	0.312833	0.504687	1.5	2	2	1.1241	38.428	3	316650	141100	175550	0.7	1	1			0	0	0	0	0.7	1	1	0.9758	NaN	1	61377	31575	29803	0	0	0			0	0	0	0
	177	E9PLL6;P46776;E9PJD9;E9PLX7	RPL27A	60S ribosomal protein L27a	>tr|E9PLL6|E9PLL6_HUMAN 60S ribosomal protein L27a OS=Homo sapiens GN=RPL27A PE=1 SV=1;>sp|P46776|RL27A_HUMAN 60S ribosomal protein L27a OS=Homo sapiens GN=RPL27A PE=1 SV=2;>tr|E9PJD9|E9PJD9_HUMAN 60S ribosomal protein L27a OS=Homo sapiens GN=RPL27A PE=1 S	12.201	6.227e-06	4		1.09525	0.0395148	0.314293	0.502665	10.2	1	1	0.74823	NaN	1	1719400	952190	767180	12	1	1	0.9047	NaN	1	577690	313010	264680	22.2	2	2	1.46987	135	2	2063000	1216300	846710	10.2	1	1	1.44624	58.705	2	2610900	1555300	1055600
	138	E5RHS5;E5RGA2;P60228	EIF3E	Eukaryotic translation initiation factor 3 subunit E	>tr|E5RHS5|E5RHS5_HUMAN Eukaryotic translation initiation factor 3 subunit E (Fragment) OS=Homo sapiens GN=EIF3E PE=1 SV=1;>tr|E5RGA2|E5RGA2_HUMAN Eukaryotic translation initiation factor 3 subunit E OS=Homo sapiens GN=EIF3E PE=1 SV=1;>sp|P60228|EIF3E_HUMA	26.635	4.9695e-05	3		1.06718	0.0282365	0.321983	0.492167	0	0	0			0	0	0	0	8.4	2	2	1.1636	25.929	2	3752900	1527400	2225500	4	1	1	1.25611	NaN	1	666720	354790	311940	4	1	1	0.831532	NaN	1	1139100	492150	646910
	179	E9PMS6;Q8WWI1-3;Q8WWI1-5;E9PMT2;Q8WWI1-4;F8WD26;Q8WWI1-2;J3KP06;Q8WWI1;H0YDQ3;E9PMP7;H0Y424	LMO7	LIM domain only protein 7	>tr|E9PMS6|E9PMS6_HUMAN LIM domain only protein 7 OS=Homo sapiens GN=LMO7 PE=1 SV=1;>sp|Q8WWI1-3|LMO7_HUMAN Isoform 3 of LIM domain only protein 7 OS=Homo sapiens GN=LMO7;>sp|Q8WWI1-5|LMO7_HUMAN Isoform 5 of LIM domain only protein 7 OS=Homo sapiens GN=LMO	145.42	0.00071274	12		1.82001	0.260074	0.323559	0.490047	0.9	1	1	4.756	NaN	1	2381000	306120	2074900	0	0	0			0	0	0	0	0	0	0			0	0	0	0	1.1	1	1	0.696476	NaN	1	40574	14425	26149
	54	B4DWL3;P11279	LAMP1	Lysosome-associated membrane glycoprotein 1	>tr|B4DWL3|B4DWL3_HUMAN Lysosome-associated membrane glycoprotein 1 OS=Homo sapiens GN=LAMP1 PE=1 SV=1;>sp|P11279|LAMP1_HUMAN Lysosome-associated membrane glycoprotein 1 OS=Homo sapiens GN=LAMP1 PE=1 SV=3	38.985	1.3194e-07	2		1.29711	0.112976	0.326223	0.486486	4.4	1	1			0	72262	72262	0	4.4	1	1	0.50247	NaN	1	75407	49104	26303	4.4	1	1	2.69136	NaN	1	50043	33917	16126	3	1	1	1.61379	5.3115	2	673670	384160	289510
	682	Q13162;H7C3T4;A6NJJ0;A6NG45	PRDX4	Peroxiredoxin-4	>sp|Q13162|PRDX4_HUMAN Peroxiredoxin-4 OS=Homo sapiens GN=PRDX4 PE=1 SV=1;>tr|H7C3T4|H7C3T4_HUMAN Peroxiredoxin-4 (Fragment) OS=Homo sapiens GN=PRDX4 PE=1 SV=1	30.54	1.056e-42	4		1.03735	0.0159253	0.32924	0.482488	26.6	6	5	0.87109	97.965	22	14048000	7190600	6857300	22.9	5	4	0.97094	78.697	18	13079000	6576000	6502600	26.6	7	5	1.18485	59.824	24	12779000	7216500	5562000	22.9	6	4	1.15554	32.081	15	12265000	6516000	5749200
	798	Q86SX6	GLRX5	Glutaredoxin-related protein 5, mitochondrial	>sp|Q86SX6|GLRX5_HUMAN Glutaredoxin-related protein 5, mitochondrial OS=Homo sapiens GN=GLRX5 PE=1 SV=2	16.628	1.6448e-80	1		1.05455	0.0230674	0.338519	0.470417	14	2	2	0.733	72.724	2	1106700	616340	490360	31.8	3	3	1.0722	99.6	3	5347300	1361900	3985400	26.1	3	3	1.29146	145.2	3	2472900	739180	1733800	14	2	2	1.21846	71.697	3	2269300	1257200	1012000
	471	P18077;F8WBS5;F8WB72;C9K025	RPL35A	60S ribosomal protein L35a	>sp|P18077|RL35A_HUMAN 60S ribosomal protein L35a OS=Homo sapiens GN=RPL35A PE=1 SV=2;>tr|F8WBS5|F8WBS5_HUMAN 60S ribosomal protein L35a OS=Homo sapiens GN=RPL35A PE=1 SV=1;>tr|F8WB72|F8WB72_HUMAN 60S ribosomal protein L35a OS=Homo sapiens GN=RPL35A PE=1 S	12.538	2.0319e-06	4		1.05279	0.0223406	0.342687	0.465103	0	0	0			0	0	0	0	16.4	2	2	0.84804	16.533	2	1778200	864270	913910	9.1	1	1	1.25331	NaN	1	371590	192080	179510	15.5	2	2	1.09786	57.09	2	1427600	717560	710080
	1009	Q9UHX1-4;Q9UHX1-6;Q9UHX1-3;Q9UHX1-5;Q9UHX1-2;Q9UHX1;E9PMU7;E9PN18;E9PQ56;H0YEM1;E9PL19;H0YCP8	PUF60	Poly(U)-binding-splicing factor PUF60	>sp|Q9UHX1-4|PUF60_HUMAN Isoform 4 of Poly(U)-binding-splicing factor PUF60 OS=Homo sapiens GN=PUF60;>sp|Q9UHX1-6|PUF60_HUMAN Isoform 6 of Poly(U)-binding-splicing factor PUF60 OS=Homo sapiens GN=PUF60;>sp|Q9UHX1-3|PUF60_HUMAN Isoform 3 of Poly(U)-binding-	54.024	8.8621e-29	12		1.08603	0.0358402	0.344944	0.462251	7.6	3	3	0.80209	31.875	5	1593300	791700	801640	3.2	1	1	0.75246	NaN	1	331200	187780	143420	15	5	5	1.50011	13.436	7	1584600	924340	660250	7.4	3	3	1.5365	10.51	4	2403300	1406500	996770
	376	O96008;K7EKG4;O96008-2;K7EJ57	TOMM40	Mitochondrial import receptor subunit TOM40 homolog	>sp|O96008|TOM40_HUMAN Mitochondrial import receptor subunit TOM40 homolog OS=Homo sapiens GN=TOMM40 PE=1 SV=1;>tr|K7EKG4|K7EKG4_HUMAN Mitochondrial import receptor subunit TOM40 homolog (Fragment) OS=Homo sapiens GN=TOMM40 PE=1 SV=1;>sp|O96008-2|TOM40_HUM	37.893	4.4485e-31	4		1.07397	0.0309911	0.348334	0.458004	4.7	1	1	0.8505	8.5476	2	1494100	769430	724690	16.1	4	4	0.78442	44.311	5	5877200	3082900	2794300	20.2	5	5	1.4346	105.81	8	27235000	23275000	3959700	15.5	4	4	1.38999	138.98	8	55899000	48462000	7436500
	710	Q14789;Q14789-2;E7EU81;H0Y867;H7C5I7	GOLGB1	Golgin subfamily B member 1	>sp|Q14789|GOGB1_HUMAN Golgin subfamily B member 1 OS=Homo sapiens GN=GOLGB1 PE=1 SV=2;>sp|Q14789-2|GOGB1_HUMAN Isoform 2 of Golgin subfamily B member 1 OS=Homo sapiens GN=GOLGB1;>tr|E7EU81|E7EU81_HUMAN Golgin subfamily B member 1 (Fragment) OS=Homo sapien	376.01	3.0322e-144	5		1.02762	0.0118324	0.349027	0.457141	8.7	20	20	0.86573	33.024	21	8437700	4213200	4224500	0.9	2	2	0.97257	30.139	2	489250	250290	238960	0.5	1	1	1.14943	NaN	1	81639	42044	39595	3	7	7	1.15225	44.9	8	2421600	1311800	1109700
	600	P61626;F8VV32	LYZ	Lysozyme C	>sp|P61626|LYSC_HUMAN Lysozyme C OS=Homo sapiens GN=LYZ PE=1 SV=1;>tr|F8VV32|F8VV32_HUMAN Lysozyme C OS=Homo sapiens GN=LYZ PE=1 SV=1	16.537	7.9093e-29	2		1.47244	0.168038	0.351343	0.454269	8.1	1	1	0.24072	143.56	4	3953400	3646400	307060	16.2	2	2	0.4098	151.3	6	16825000	10611000	6214100	8.1	1	1	10.7895	67.056	6	5586300	5378700	207570	27	2	2	4.41638	32.488	6	19136000	18310000	825960
	164	Q14203-5;Q14203-2;Q14203-3;Q14203-4;E7EX90;Q14203-6;Q14203;Q6AWB1;E7EWF7	DCTN1	Dynactin subunit 1	>sp|Q14203-5|DCTN1_HUMAN Isoform 5 of Dynactin subunit 1 OS=Homo sapiens GN=DCTN1;>sp|Q14203-2|DCTN1_HUMAN Isoform p135 of Dynactin subunit 1 OS=Homo sapiens GN=DCTN1;>sp|Q14203-3|DCTN1_HUMAN Isoform 3 of Dynactin subunit 1 OS=Homo sapiens GN=DCTN1;>sp|Q14	126.73	2.4718e-38	9		1.02862	0.0122548	0.351348	0.454262	4.8	4	4	0.92151	23.797	5	1571600	767400	804200	3.6	3	3	0.95806	24.728	3	535930	258570	277350	4.4	4	4	1.10206	4.4675	2	598160	299770	298390	5.4	5	5	1.15059	88.071	7	4338200	1526100	2812100
	511	P31151;Q86SG5	S100A7;S100A7A	Protein S100-A7;Protein S100-A7A	>sp|P31151|S10A7_HUMAN Protein S100-A7 OS=Homo sapiens GN=S100A7 PE=1 SV=4;>sp|Q86SG5|S1A7A_HUMAN Protein S100-A7A OS=Homo sapiens GN=S100A7A PE=1 SV=3	11.471	1.1015e-14	2		1.45164	0.161858	0.352704	0.452589	54.5	4	4	0.10616	65.413	2	1978000	1853600	124450	30.7	2	2	1.8978	9.247	2	467950	318730	149220	22.8	2	2	5.86786	40.428	3	1199800	1139900	59865	43.6	4	4	3.75615	78.622	4	4781700	4428800	352890
	506	P30050;P30050-2	RPL12	60S ribosomal protein L12	>sp|P30050|RL12_HUMAN 60S ribosomal protein L12 OS=Homo sapiens GN=RPL12 PE=1 SV=1;>sp|P30050-2|RL12_HUMAN Isoform 2 of 60S ribosomal protein L12 OS=Homo sapiens GN=RPL12	17.818	7.7525e-90	2		1.03073	0.0131458	0.35772	0.446457	43	5	5	0.92731	82.396	6	10379000	5303500	5075500	43	5	5	0.8993	19.164	5	8428900	4554000	3874900	43	5	5	1.1286	41.981	7	7058100	3703700	3354300	45.5	5	5	1.19926	86.849	7	12475000	5632100	6842500
	142	E5RJZ1;H0YBD2;O14548	COX7A2L	Cytochrome c oxidase subunit 7A-related protein, mitochondrial	>tr|E5RJZ1|E5RJZ1_HUMAN Cytochrome c oxidase subunit 7A-related protein, mitochondrial OS=Homo sapiens GN=COX7A2L PE=1 SV=1;>tr|H0YBD2|H0YBD2_HUMAN Cytochrome c oxidase subunit 7A-related protein, mitochondrial (Fragment) OS=Homo sapiens GN=COX7A2L PE=1 SV	8.8399	0.00083379	3		1.039	0.0166144	0.371119	0.430487	0	0	0			0	0	0	0	16.5	1	1	0.95468	NaN	1	804710	417150	387560	16.5	1	1	1.13076	NaN	1	270120	129510	140610	0	0	0			0	0	0	0
	23	Q9NP97;Q8TF09;B4DFR2;H3BQI1;B1AKR6	DYNLRB1;DYNLRB2	Dynein light chain roadblock-type 1;Dynein light chain roadblock-type 2	>sp|Q9NP97|DLRB1_HUMAN Dynein light chain roadblock-type 1 OS=Homo sapiens GN=DYNLRB1 PE=1 SV=3;>sp|Q8TF09|DLRB2_HUMAN Dynein light chain roadblock-type 2 OS=Homo sapiens GN=DYNLRB2 PE=1 SV=1;>tr|B4DFR2|B4DFR2_HUMAN Dynein light chain roadblock-type 1 OS=H	10.921	0.00019756	5		1.0696	0.0292207	0.371119	0.430487	0	0	0			0	0	0	0	12.5	1	1	0.906	NaN	1	727810	347940	379870	0	0	0			0	0	0	0	12.5	1	1	1.26274	NaN	1	849660	473650	376010
	321	O43464-2;O43464-3;O43464;P83110-2;O43464-4;P83110	HTRA2	Serine protease HTRA2, mitochondrial	>sp|O43464-2|HTRA2_HUMAN Isoform 2 of Serine protease HTRA2, mitochondrial OS=Homo sapiens GN=HTRA2;>sp|O43464-3|HTRA2_HUMAN Isoform 3 of Serine protease HTRA2, mitochondrial OS=Homo sapiens GN=HTRA2;>sp|O43464|HTRA2_HUMAN Serine protease HTRA2, mitochondr	38.493	1.9821e-15	6		1.02662	0.0114108	0.379036	0.421319	3.3	1	1	0.89527	NaN	1	534780	265640	269140	9.7	3	3	0.90734	106.24	3	1947600	883550	1064100	6.1	2	2	1.06235	NaN	1	363480	181650	181830	3.3	1	1	1.28722	NaN	1	732620	406680	325950
	461	P14923;C9JTX4;C9J826;C9JK18;C9JKY1;B4DGU4;P35222;P35222-2	JUP	Junction plakoglobin	>sp|P14923|PLAK_HUMAN Junction plakoglobin OS=Homo sapiens GN=JUP PE=1 SV=3	81.744	8.0896e-264	8		1.55391	0.191425	0.381732	0.418242	32.3	16	12	0.17785	155.93	6	15616000	13589000	2027400	36.1	17	11	0.14071	158.14	6	13468000	12105000	1363700	30.6	16	9	28.538	165.19	5	6838700	6530400	308300	27.2	14	9	8.16393	122.84	6	17269000	16838000	431570
	1014	Q9ULT8;G3V4V5;H0YJP0	HECTD1	E3 ubiquitin-protein ligase HECTD1	>sp|Q9ULT8|HECD1_HUMAN E3 ubiquitin-protein ligase HECTD1 OS=Homo sapiens GN=HECTD1 PE=1 SV=3;>tr|G3V4V5|G3V4V5_HUMAN E3 ubiquitin-protein ligase HECTD1 (Fragment) OS=Homo sapiens GN=HECTD1 PE=1 SV=1;>tr|H0YJP0|H0YJP0_HUMAN E3 ubiquitin-protein ligase HECT	289.38	6.0372e-05	3		1.81958	0.259972	0.385295	0.414207	0	0	0			0	0	0	0	0.3	1	1	8.8255	102.55	6	25751000	636500	25114000	0.4	1	1	0.37515	19.498	2	38914000	8307600	30606000	0	0	0			0	0	0	0
	625	P63173;J3KT73;J3QL01;J3KSP2	RPL38	60S ribosomal protein L38	>sp|P63173|RL38_HUMAN 60S ribosomal protein L38 OS=Homo sapiens GN=RPL38 PE=1 SV=2;>tr|J3KT73|J3KT73_HUMAN 60S ribosomal protein L38 OS=Homo sapiens GN=RPL38 PE=1 SV=1;>tr|J3QL01|J3QL01_HUMAN 60S ribosomal protein L38 OS=Homo sapiens GN=RPL38 PE=1 SV=1;>tr	8.2178	6.1782e-13	4		1.03506	0.0149651	0.389903	0.409043	0	0	0			0	0	0	0	35.7	2	2	0.86029	0.52092	2	3318800	1776800	1542000	50	3	3	1.1455	91.632	3	1134000	620410	513560	35.7	3	3	1.12526	11.692	9	11198000	5770300	5427700
	620	P62906	RPL10A	60S ribosomal protein L10a	>sp|P62906|RL10A_HUMAN 60S ribosomal protein L10a OS=Homo sapiens GN=RPL10A PE=1 SV=2	24.831	1.0963e-14	1		1.02826	0.012103	0.393656	0.404883	11.1	2	2	0.82218	109.05	4	5041900	2706600	2335300	7.4	1	1	1.0652	NaN	1	3691600	1738500	1953100	7.4	1	1	1.10084	16.294	2	5369300	2707900	2661400	7.4	1	1	1.15955	NaN	1	2271600	1202900	1068700
	754	Q5T750	XP32	Skin-specific protein 32	>sp|Q5T750|XP32_HUMAN Skin-specific protein 32 OS=Homo sapiens GN=XP32 PE=1 SV=1	26.238	4.6986e-22	1		1.45802	0.163762	0.395963	0.402345	12.4	3	3	0.14986	65.696	2	1976100	1906200	69902	8.4	2	2	0.15069	NaN	1	1112900	1103900	9062	22.8	5	5	9.87264	119.51	3	3724100	3476400	247770	17.2	4	4	20.2696	111.11	3	3806800	3703500	103360
	608	P62277;J3KMX5;E9PS50	RPS13	40S ribosomal protein S13	>sp|P62277|RS13_HUMAN 40S ribosomal protein S13 OS=Homo sapiens GN=RPS13 PE=1 SV=2;>tr|J3KMX5|J3KMX5_HUMAN 40S ribosomal protein S13 OS=Homo sapiens GN=RPS13 PE=1 SV=1	17.222	2.98e-32	3		1.02444	0.0104867	0.396504	0.401752	23.8	5	5	0.91071	113.46	6	8981300	4515200	4466100	33.1	5	5	0.8765	126.72	7	10168000	5306000	4862100	38.4	7	7	1.17588	94.626	9	10676000	5758200	4918200	37.7	6	6	1.17342	64.907	17	18304000	9590800	8712900
	292	M0R0G9;M0QXK2;M0R221;M0R2B8;M0QZG7;P09012;P08579;M0R268	SNRPA;SNRPB2	U1 small nuclear ribonucleoprotein A;U2 small nuclear ribonucleoprotein B	>tr|M0R0G9|M0R0G9_HUMAN U1 small nuclear ribonucleoprotein A OS=Homo sapiens GN=SNRPA PE=1 SV=1;>tr|M0QXK2|M0QXK2_HUMAN U1 small nuclear ribonucleoprotein A (Fragment) OS=Homo sapiens GN=SNRPA PE=1 SV=2;>tr|M0R221|M0R221_HUMAN U1 small nuclear ribonucleopr	10.083	0.00061289	8		1.01216	0.00525057	0.397583	0.400572	20.7	2	2	1.0381	33.507	2	1052100	514530	537570	0	0	0			0	0	0	0	9.2	1	1	0.986875	NaN	1	338460	162120	176330	0	0	0			0	0	0	0
	658	Q02878;F8VZ45;U3KQR5;F8VR69;F8VZA3;F8VWR1;F8VU16	RPL6	60S ribosomal protein L6	>sp|Q02878|RL6_HUMAN 60S ribosomal protein L6 OS=Homo sapiens GN=RPL6 PE=1 SV=3;>tr|F8VZ45|F8VZ45_HUMAN 60S ribosomal protein L6 (Fragment) OS=Homo sapiens GN=RPL6 PE=1 SV=1;>tr|U3KQR5|U3KQR5_HUMAN 60S ribosomal protein L6 (Fragment) OS=Homo sapiens GN=RPL	32.728	8.4608e-52	7		1.03479	0.0148514	0.404391	0.393199	11.1	2	2	0.79608	33.305	7	1605200	904290	700870	19.4	4	4	0.86709	20.4	10	4116700	2134800	1981900	15.6	3	3	1.36996	16.222	15	1384300	808140	576120	5.2	1	1	1.21249	18.346	3	650070	361310	288760
	73	B8ZZK2;O75223;O75223-2;O75223-4;O75223-3;M0QZK8;H7BZK5	GGCT	Gamma-glutamylcyclotransferase	>tr|B8ZZK2|B8ZZK2_HUMAN Gamma-glutamylcyclotransferase OS=Homo sapiens GN=GGCT PE=1 SV=1;>sp|O75223|GGCT_HUMAN Gamma-glutamylcyclotransferase OS=Homo sapiens GN=GGCT PE=1 SV=1;>sp|O75223-2|GGCT_HUMAN Isoform 2 of Gamma-glutamylcyclotransferase OS=Homo sapi	18.398	1.2207e-07	7		1.22123	0.0867965	0.405062	0.392479	6.6	1	1	0.30864	NaN	1	360180	292380	67795	0	0	0			0	0	0	0	7.8	1	1	3.69413	NaN	1	311840	296240	15598	8.4	1	1	1.59744	NaN	1	360990	317070	43928
	404	P04406;P04406-2;E7EUT5	GAPDH	Glyceraldehyde-3-phosphate dehydrogenase	>sp|P04406|G3P_HUMAN Glyceraldehyde-3-phosphate dehydrogenase OS=Homo sapiens GN=GAPDH PE=1 SV=3;>sp|P04406-2|G3P_HUMAN Isoform 2 of Glyceraldehyde-3-phosphate dehydrogenase OS=Homo sapiens GN=GAPDH;>tr|E7EUT5|E7EUT5_HUMAN Glyceraldehyde-3-phosphate dehydr	36.053	5.6068e-104	3		1.13894	0.0565001	0.40661	0.390822	17.9	4	4	0.46948	41.793	5	5422500	4359800	1062800	20.3	5	5	0.52854	57.153	5	7988100	6017800	1970300	17.9	4	4	1.99279	133.45	7	4504000	3437700	1066300	25.7	6	6	3.40287	73.68	10	13847000	12259000	1587400
	570	P51572;P51572-2;C9JSP1;C9JQ75;C9J0M4;C9JMD7;C9JM14	BCAP31	B-cell receptor-associated protein 31	>sp|P51572|BAP31_HUMAN B-cell receptor-associated protein 31 OS=Homo sapiens GN=BCAP31 PE=1 SV=3;>sp|P51572-2|BAP31_HUMAN Isoform 2 of B-cell receptor-associated protein 31 OS=Homo sapiens GN=BCAP31;>tr|C9JSP1|C9JSP1_HUMAN B-cell receptor-associated protei	27.991	2.3045e-82	7		1.03329	0.0142239	0.409181	0.388085	7.7	1	1	1.0272	NaN	1	751470	314790	436680	7.7	1	1	0.76448	NaN	1	406100	199370	206730	25.6	5	5	1.31825	74.212	5	3425600	1889500	1536100	25.6	5	5	1.10122	62.995	5	5930300	2822600	3107600
	63	B5MCP9;P62081	RPS7	40S ribosomal protein S7	>tr|B5MCP9|B5MCP9_HUMAN 40S ribosomal protein S7 OS=Homo sapiens GN=RPS7 PE=1 SV=1;>sp|P62081|RS7_HUMAN 40S ribosomal protein S7 OS=Homo sapiens GN=RPS7 PE=1 SV=1	21.312	8.1382e-30	2		1.01017	0.00439454	0.412001	0.385102	22.5	3	3	0.96205	92.406	5	11395000	5737400	5657800	22.5	3	3	0.91531	96.517	6	6330700	2796300	3534400	18.2	2	2	1.08891	88.141	5	8105300	4096600	4008800	34.8	4	4	1.08598	55.959	29	23300000	12325000	10975000
	140	E5RI99;P62888;E5RJH3	RPL30	60S ribosomal protein L30	>tr|E5RI99|E5RI99_HUMAN 60S ribosomal protein L30 (Fragment) OS=Homo sapiens GN=RPL30 PE=1 SV=1;>sp|P62888|RL30_HUMAN 60S ribosomal protein L30 OS=Homo sapiens GN=RPL30 PE=1 SV=2	12.656	1.0604e-27	3		1.0109	0.00470652	0.416649	0.38023	14	1	1	0.92795	NaN	1	934740	463990	470750	41.2	3	3	0.94363	98.677	3	6440900	3278200	3162700	30.7	2	2	1.04242	16.509	2	1240800	631210	609590	30.7	2	2	1.14409	87.614	2	3012000	1595300	1416700
	657	Q02413;B7Z845	DSG1	Desmoglein-1	>sp|Q02413|DSG1_HUMAN Desmoglein-1 OS=Homo sapiens GN=DSG1 PE=1 SV=2	113.75	2.5911e-242	2		1.1329	0.0541911	0.417204	0.379652	16.4	12	12	0.45014	119.29	10	11166000	9419000	1747300	18.5	12	12	0.4558	96.325	13	16479000	14822000	1656500	19.1	13	13	2.51883	126.3	22	14995000	11420000	3575000	19.4	14	14	3.18745	135.63	36	53033000	43238000	9795300
	976	Q9NW13-2;Q9NW13;C9JE21;C9JAA9	RBM28	RNA-binding protein 28	>sp|Q9NW13-2|RBM28_HUMAN Isoform 2 of RNA-binding protein 28 OS=Homo sapiens GN=RBM28;>sp|Q9NW13|RBM28_HUMAN RNA-binding protein 28 OS=Homo sapiens GN=RBM28 PE=1 SV=3	69.922	2.3892e-16	4		1.01448	0.00624344	0.420355	0.376384	3.6	2	2	1.1645	23.866	2	681220	286720	394500	2.4	1	1	0.85017	NaN	1	598360	296760	301600	2.4	1	1	1.14775	NaN	1	131620	69333	62283	2.4	1	1	0.93214	NaN	1	258970	111310	147660
	450	P12273	PIP	Prolactin-inducible protein	>sp|P12273|PIP_HUMAN Prolactin-inducible protein OS=Homo sapiens GN=PIP PE=1 SV=1	16.572	5.7739e-39	1		1.64969	0.217403	0.424364	0.372261	32.9	4	4			0	8016900	8016900	0	43.8	5	5	0.017914	NaN	1	15585000	15571000	14134	43.8	5	5	11.0774	12.789	3	5643100	5596600	46461	43.8	5	5	22.6244	171.06	3	19107000	19012000	94878
	457	P14625;H0YIV0;Q58FF3	HSP90B1	Endoplasmin	>sp|P14625|ENPL_HUMAN Endoplasmin OS=Homo sapiens GN=HSP90B1 PE=1 SV=1	92.468	1.1747e-41	3		1.01871	0.00805091	0.435874	0.360639	7.3	6	4	0.79724	11.678	4	1946100	1070100	875950	5.6	5	3	0.96579	40.075	3	1148600	556610	592000	4.4	3	3	1.23053	3.8571	3	1287100	769780	517370	10.7	7	6	1.13669	39.541	6	3950400	2156300	1794200
	866	Q96AV8-3;Q96AV8;H0YHW2;H0YIF4;F8VSE7;Q96AV8-2	E2F7	Transcription factor E2F7	>sp|Q96AV8-3|E2F7_HUMAN Isoform 3 of Transcription factor E2F7 OS=Homo sapiens GN=E2F7;>sp|Q96AV8|E2F7_HUMAN Transcription factor E2F7 OS=Homo sapiens GN=E2F7 PE=1 SV=3;>tr|H0YHW2|H0YHW2_HUMAN Transcription factor E2F7 (Fragment) OS=Homo sapiens GN=E2F7 PE	98.351	2.1062e-06	6		1.06245	0.0263084	0.437053	0.359466	1.8	1	1	0.53325	NaN	1	92110	71001	21109	0	0	0			0	0	0	0	3	2	2	1.54036	25.087	4	490830	287630	203190	1.2	1	1	1.46007	25.197	2	479560	290870	188690
	775	Q6UWP8;K7ESC4;Q6UWP8-2	SBSN	Suprabasin	>sp|Q6UWP8|SBSN_HUMAN Suprabasin OS=Homo sapiens GN=SBSN PE=2 SV=2	60.54	2.6496e-27	3		1.3558	0.132197	0.437645	0.358878	18.3	3	3	0.15526	186.89	7	1524900	1387300	137570	15.3	2	2	0.027469	336.93	3	2959000	772390	2186600	15.3	2	2	26.5006	134.02	8	1366700	1338700	28084	20	4	4	29.8972	150.01	11	2780800	2697700	83115
	295	M0R210;P62249;M0R3H0;M0QX76;M0R1M5;Q6IPX4	RPS16	40S ribosomal protein S16	>tr|M0R210|M0R210_HUMAN 40S ribosomal protein S16 OS=Homo sapiens GN=RPS16 PE=1 SV=1;>sp|P62249|RS16_HUMAN 40S ribosomal protein S16 OS=Homo sapiens GN=RPS16 PE=1 SV=2;>tr|M0R3H0|M0R3H0_HUMAN 40S ribosomal protein S16 OS=Homo sapiens GN=RPS16 PE=1 SV=1;>tr	14.419	4.2283e-15	6		1.01878	0.00807957	0.439575	0.356967	7.8	1	1	0.78669	34.348	2	2523300	1341000	1182300	36.4	5	5	0.98478	88.423	5	8174000	4327600	3846400	7.8	1	1	1.32552	27.475	2	1514000	843390	670610	45	6	6	1.04903	63.702	13	14972000	8036200	6936300
	412	P05109	S100A8	Protein S100-A8;Protein S100-A8, N-terminally processed	>sp|P05109|S10A8_HUMAN Protein S100-A8 OS=Homo sapiens GN=S100A8 PE=1 SV=1	10.834	6.2568e-36	1		1.21042	0.0829347	0.441739	0.354834	32.3	3	3	0.2073	148.82	8	12388000	12000000	388680	31.2	3	3	0.10867	61.512	7	12804000	11975000	828880	32.3	3	3	5.89936	122.94	7	13017000	12818000	198990	45.2	6	6	16.152	162.32	12	41023000	40136000	886950
	767	Q6P2Q9;I3L3Z8	PRPF8	Pre-mRNA-processing-splicing factor 8	>sp|Q6P2Q9|PRP8_HUMAN Pre-mRNA-processing-splicing factor 8 OS=Homo sapiens GN=PRPF8 PE=1 SV=2;>tr|I3L3Z8|I3L3Z8_HUMAN Pre-mRNA-processing-splicing factor 8 (Fragment) OS=Homo sapiens GN=PRPF8 PE=1 SV=1	273.6	2.8292e-06	2		1.01842	0.00792747	0.442265	0.354317	0.3	1	1	0.80695	NaN	1	189930	108800	81125	0	0	0			0	0	0	0	1	2	2	0.998104	7.2672	2	182950	93526	89424	0.3	1	1	1.31148	NaN	1	163300	90598	72697
	74	C9JD32;B9ZVP7;J3KT29;P62829	RPL23	60S ribosomal protein L23	>tr|C9JD32|C9JD32_HUMAN 60S ribosomal protein L23 (Fragment) OS=Homo sapiens GN=RPL23 PE=1 SV=1;>tr|B9ZVP7|B9ZVP7_HUMAN 60S ribosomal protein L23 OS=Homo sapiens GN=RPL23 PE=1 SV=1;>tr|J3KT29|J3KT29_HUMAN 60S ribosomal protein L23 OS=Homo sapiens GN=RPL23	9.6694	1.666e-33	4		1.01054	0.00455492	0.449748	0.347031	0	0	0			0	0	0	0	22	1	1	0.95953	NaN	1	1464600	740690	723890	22	1	1	1.11722	NaN	1	473680	229440	244240	22	1	1	0.962649	NaN	1	1374100	645950	728130
	555	P48634;P48634-4;P48634-2;P48634-3	PRRC2A	Protein PRRC2A	>sp|P48634|PRC2A_HUMAN Protein PRRC2A OS=Homo sapiens GN=PRRC2A PE=1 SV=3;>sp|P48634-4|PRC2A_HUMAN Isoform 4 of Protein PRRC2A OS=Homo sapiens GN=PRRC2A;>sp|P48634-2|PRC2A_HUMAN Isoform 2 of Protein PRRC2A OS=Homo sapiens GN=PRRC2A;>sp|P48634-3|PRC2A_HUMAN	228.86	3.1573e-05	4		1.03612	0.0154088	0.450152	0.346641	0.6	1	1	0.83999	NaN	1	67989	36089	31900	0	0	0			0	0	0	0	0	0	0			0	0	0	0	1.2	2	2	1.27804	NaN	1	373570	325540	48027
	497	P26599;P26599-2;P26599-3;K7EK45;A6NLN1;K7EKJ7;K7ES59;K7ELW5	PTBP1	Polypyrimidine tract-binding protein 1	>sp|P26599|PTBP1_HUMAN Polypyrimidine tract-binding protein 1 OS=Homo sapiens GN=PTBP1 PE=1 SV=1;>sp|P26599-2|PTBP1_HUMAN Isoform 2 of Polypyrimidine tract-binding protein 1 OS=Homo sapiens GN=PTBP1;>sp|P26599-3|PTBP1_HUMAN Isoform 3 of Polypyrimidine trac	57.221	4.2029e-141	8		1.01684	0.00725388	0.450737	0.346077	13.4	5	5	0.8774	10.247	5	3240400	1720800	1519600	21.5	7	7	0.77105	57.616	7	5053500	2232000	2821500	16.8	5	5	1.17757	66.781	6	2988900	962070	2026800	21.5	7	7	1.34199	52.771	7	4812900	1754900	3058000
	386	P01617;P01614;P06309;P06310		Ig kappa chain V-II region TEW;Ig kappa chain V-II region Cum;Ig kappa chain V-II region GM607;Ig kappa chain V-II region RPMI 6410	>sp|P01617|KV204_HUMAN Ig kappa chain V-II region TEW OS=Homo sapiens PE=1 SV=1;>sp|P01614|KV201_HUMAN Ig kappa chain V-II region Cum OS=Homo sapiens PE=1 SV=1;>sp|P06309|KV205_HUMAN Ig kappa chain V-II region GM607 (Fragment) OS=Homo sapiens PE=4 SV=1;>sp	12.059	9.9474e-51	4		1.24209	0.0941524	0.451072	0.345754	35.4	3	3	0.077015	254.14	56	31669000000	31608000000	60347000	14.2	2	2	0.059667	229.38	53	23096000000	23084000000	11855000	14.2	2	2	25.5957	187.62	53	26488000000	26477000000	10846000	14.2	2	2	20.2364	198.68	62	36496000000	36475000000	20664000
	617	P62851	RPS25	40S ribosomal protein S25	>sp|P62851|RS25_HUMAN 40S ribosomal protein S25 OS=Homo sapiens GN=RPS25 PE=1 SV=1	13.742	3.2509e-11	1		1.01104	0.0047691	0.455245	0.341755	15.2	2	2	0.93642	123.79	2	1914200	954940	959250	22.4	3	3	1.0071	26.337	3	2901600	1352400	1549200	16.8	3	3	1.31063	80.407	4	1685300	837650	847650	8.8	1	1	0.84538	73.556	3	2073000	942040	1131000
	859	Q92820	GGH	Gamma-glutamyl hydrolase	>sp|Q92820|GGH_HUMAN Gamma-glutamyl hydrolase OS=Homo sapiens GN=GGH PE=1 SV=2	35.964	1.0927e-48	1		1.02197	0.00943962	0.455787	0.341238	8.8	2	2	0.77808	4.5194	2	1851100	1061100	789940	23.9	6	6	0.70786	58.429	9	10274000	5773600	4500200	20.1	5	5	1.28538	83.54	6	3248100	1778800	1469300	23.9	6	6	1.54083	75.391	9	7793200	4485800	3307400
	169	P11532-3;P11532-2;P11532-4;E9PDN5;P11532	DMD	Dystrophin	>sp|P11532-3|DMD_HUMAN Isoform 2 of Dystrophin OS=Homo sapiens GN=DMD;>sp|P11532-2|DMD_HUMAN Isoform 1 of Dystrophin OS=Homo sapiens GN=DMD;>sp|P11532-4|DMD_HUMAN Isoform 3 of Dystrophin OS=Homo sapiens GN=DMD;>tr|E9PDN5|E9PDN5_HUMAN Dystrophin OS=Homo sap	271.04	3.4886e-05	5		1.33885	0.126732	0.456461	0.340596	0.5	1	1	0.011837	39.361	9	115650000	115370000	281760	0.5	1	1	0.036404	160.68	5	32775000	32529000	245550	0.5	1	1	125.65	188.16	6	103650000	103350000	301730	0.5	1	1	59.3437	176.18	8	319670000	318920000	742450
	753	Q5T749	KPRP	Keratinocyte proline-rich protein	>sp|Q5T749|KPRP_HUMAN Keratinocyte proline-rich protein OS=Homo sapiens GN=KPRP PE=1 SV=1	64.135	6.7074e-76	1		1.15851	0.0638997	0.457974	0.339159	25.4	13	13	0.07628	153.72	9	24657000	23740000	917560	25.9	10	10	0.2281	77.84	5	13639000	13248000	390620	23.7	12	12	19.8807	275.64	6	26698000	25680000	1018400	40.6	16	16	5.20752	177	14	43115000	41000000	2114800
	299	O00330-3;O00330;H0YD97;O00330-2;E9PLU0;E9PRI6	PDHX	Pyruvate dehydrogenase protein X component, mitochondrial	>sp|O00330-3|ODPX_HUMAN Isoform 3 of Pyruvate dehydrogenase protein X component, mitochondrial OS=Homo sapiens GN=PDHX;>sp|O00330|ODPX_HUMAN Pyruvate dehydrogenase protein X component, mitochondrial OS=Homo sapiens GN=PDHX PE=1 SV=3;>tr|H0YD97|H0YD97_HUMAN	51.459	3.2768e-88	6		1.01325	0.0057147	0.458053	0.339084	28.4	11	11	0.87419	66.596	14	20987000	6415700	14571000	19.5	8	8	0.83896	25.278	11	9351200	4733700	4617500	23	9	9	1.16412	79.279	16	8332400	4271500	4060900	28.4	11	11	1.23457	11.603	12	13940000	7465100	6475300
	464	P16615;H7C5W9;P16615-5;P16615-2;P16615-3;P16615-4;O14983-3;O14983-2;O14983;Q93084-4;Q93084-2;Q93084-3;Q93084-7;Q93084;Q93084-6;Q93084-5;H3BTW4	ATP2A2	Sarcoplasmic/endoplasmic reticulum calcium ATPase 2	>sp|P16615|AT2A2_HUMAN Sarcoplasmic/endoplasmic reticulum calcium ATPase 2 OS=Homo sapiens GN=ATP2A2 PE=1 SV=1;>tr|H7C5W9|H7C5W9_HUMAN Sarcoplasmic/endoplasmic reticulum calcium ATPase 2 (Fragment) OS=Homo sapiens GN=ATP2A2 PE=1 SV=1;>sp|P16615-5|AT2A2_HUM	114.76	4.3655e-85	17		1.00587	0.00254376	0.459923	0.337315	13	11	11	0.96182	22.173	11	4981700	2411500	2570200	3.7	3	3	0.88299	10.242	3	1071800	591420	480360	15.5	12	12	1.11868	17.158	11	3388200	1793600	1594600	14.5	13	13	1.0775	34.085	14	8661500	4381600	4279900
	64	Q99613-2;Q99613;B5ME19;H3BPE3;H3BTY8;H3BPE4	EIF3C;EIF3CL	Eukaryotic translation initiation factor 3 subunit C	>sp|Q99613-2|EIF3C_HUMAN Isoform 2 of Eukaryotic translation initiation factor 3 subunit C OS=Homo sapiens GN=EIF3C;>sp|Q99613|EIF3C_HUMAN Eukaryotic translation initiation factor 3 subunit C OS=Homo sapiens GN=EIF3C PE=1 SV=1;>sp|B5ME19|EIFCL_HUMAN Eukary	104.1	2.5653e-45	6		1.00528	0.00228548	0.467008	0.330676	7.3	6	6	0.87912	83.278	5	2734300	978020	1756300	4.4	3	3	1.0381	19.193	3	1586200	725990	860250	3.2	3	3	1.17099	10.235	3	739650	371150	368500	7.9	7	7	0.955657	17.349	6	2716100	1314100	1402000
	419	P07339;H7C469;H7C1V0;F8WD96;C9JH19;F8W787	CTSD	Cathepsin D;Cathepsin D light chain;Cathepsin D heavy chain	>sp|P07339|CATD_HUMAN Cathepsin D OS=Homo sapiens GN=CTSD PE=1 SV=1;>tr|H7C469|H7C469_HUMAN Uncharacterized protein (Fragment) OS=Homo sapiens PE=3 SV=1;>tr|H7C1V0|H7C1V0_HUMAN Cathepsin D light chain (Fragment) OS=Homo sapiens GN=CTSD PE=1 SV=1;>tr|F8WD96	44.552	1.8486e-25	6		1.07888	0.0329749	0.467432	0.330282	9.7	3	3	0.18005	59.353	2	2853600	2405100	448500	11.7	3	3	0.29678	22.757	2	2034500	1604000	430450	14.6	5	5	3.5163	6.0992	2	1654400	1439000	215370	19.2	6	6	7.21085	24.956	4	7716100	7023200	692840
	696	Q13835-2;Q13835	PKP1	Plakophilin-1	>sp|Q13835-2|PKP1_HUMAN Isoform 1 of Plakophilin-1 OS=Homo sapiens GN=PKP1;>sp|Q13835|PKP1_HUMAN Plakophilin-1 OS=Homo sapiens GN=PKP1 PE=1 SV=2	80.496	1.7963e-68	2		1.11584	0.047602	0.471285	0.326716	5.2	3	3	0.080614	NaN	1	1514400	1486700	27710	2.1	1	1			0	1568400	1568400	0	6.3	3	3	5.67666	NaN	1	608750	596920	11836	6.3	3	3	3.03601	NaN	1	1857000	1807500	49436
	676	Q12907;D6RIU4;D6RBV2;D6RDX1	LMAN2	Vesicular integral-membrane protein VIP36	>sp|Q12907|LMAN2_HUMAN Vesicular integral-membrane protein VIP36 OS=Homo sapiens GN=LMAN2 PE=1 SV=1;>tr|D6RIU4|D6RIU4_HUMAN Vesicular integral-membrane protein VIP36 (Fragment) OS=Homo sapiens GN=LMAN2 PE=1 SV=2;>tr|D6RBV2|D6RBV2_HUMAN Vesicular integral-m	40.228	9.8536e-13	4		1.01481	0.00638264	0.474231	0.32401	3.1	1	1	0.93297	NaN	1	372490	193810	178680	12.1	3	3	0.74009	155.6	5	6216800	4840800	1376100	5.9	1	1	1.51355	NaN	1	402140	195610	206520	0	0	0			0	0	0	0
	776	Q6UXV4	APOOL	Apolipoprotein O-like	>sp|Q6UXV4|APOOL_HUMAN Apolipoprotein O-like OS=Homo sapiens GN=APOOL PE=1 SV=1	29.159	2.5047e-07	1		1.01849	0.0079577	0.474534	0.323733	4.5	1	1	0.71322	NaN	1	361880	207920	153960	10.4	2	2	1.4831	54.974	2	535610	238330	297270	0	0	0			0	0	0	0	6	1	1	0.998801	NaN	1	403330	195420	207920
	664	Q08188	TGM3	Protein-glutamine gamma-glutamyltransferase E;Protein-glutamine gamma-glutamyltransferase E 50 kDa catalytic chain;Protein-glutamine gamma-glutamyltransferase E 27 kDa non-catalytic chain	>sp|Q08188|TGM3_HUMAN Protein-glutamine gamma-glutamyltransferase E OS=Homo sapiens GN=TGM3 PE=1 SV=4	76.631	3.5727e-192	1		1.06514	0.0274083	0.47521	0.323114	13.1	6	6	0.29869	208.04	2	2407000	2173700	233240	7.2	4	4	0.15199	NaN	1	1611200	1605900	5313.7	12.3	5	5	5.37259	NaN	1	795390	763160	32234	18.9	9	9	5.27732	162.26	4	6560900	6178900	381930
	860	Q92896;Q92896-3;Q92896-2;H3BM42;H3BRD8;H3BQU9	GLG1	Golgi apparatus protein 1	>sp|Q92896|GSLG1_HUMAN Golgi apparatus protein 1 OS=Homo sapiens GN=GLG1 PE=1 SV=2;>sp|Q92896-3|GSLG1_HUMAN Isoform 3 of Golgi apparatus protein 1 OS=Homo sapiens GN=GLG1;>sp|Q92896-2|GSLG1_HUMAN Isoform 2 of Golgi apparatus protein 1 OS=Homo sapiens GN=GL	134.55	2.3766e-26	6		1.00647	0.00279899	0.477552	0.320979	5.4	5	5	1.0031	33.41	8	3053700	1511900	1541800	1	1	1	0.78113	5.0542	2	165270	80628	84642	1.7	2	2	1.08637	5.3602	2	477420	245220	232200	4.1	4	4	1.20546	39.768	6	1935200	878430	1056800
	455	P13489;E9PMA9;E9PMN0;E9PIK5;E9PMJ3;E9PLZ3;E9PIM9;H0YCR7	RNH1	Ribonuclease inhibitor	>sp|P13489|RINI_HUMAN Ribonuclease inhibitor OS=Homo sapiens GN=RNH1 PE=1 SV=2;>tr|E9PMA9|E9PMA9_HUMAN Ribonuclease inhibitor OS=Homo sapiens GN=RNH1 PE=1 SV=1;>tr|E9PMN0|E9PMN0_HUMAN Ribonuclease inhibitor OS=Homo sapiens GN=RNH1 PE=1 SV=1;>tr|E9PIK5|E9PI	49.973	4.8726e-12	8		1.07502	0.031417	0.478465	0.32015	5	2	2	0.13464	142.63	4	11302000	10818000	483950	5	2	2	0.11279	133.31	6	22542000	21073000	1468900	5	2	2	16.8384	88.7	4	9159100	9041000	118120	5	2	2	5.22302	140.86	3	3682300	3386800	295520
	481	P22528;E7ETD7;P35321	SPRR1B;SPRR1A	Cornifin-B;Cornifin-A	>sp|P22528|SPR1B_HUMAN Cornifin-B OS=Homo sapiens GN=SPRR1B PE=1 SV=2;>tr|E7ETD7|E7ETD7_HUMAN Cornifin-B OS=Homo sapiens GN=SPRR1B PE=4 SV=1;>sp|P35321|SPR1A_HUMAN Cornifin-A OS=Homo sapiens GN=SPRR1A PE=1 SV=2	9.8875	1.0113e-13	3		1.17245	0.0690951	0.47901	0.319655	15.7	1	1			0	578100	578100	0	15.7	1	1	0.10189	NaN	1	638740	609340	29401	42.7	3	3			0	1964800	1964800	0	52.8	3	3	13.4915	238.3	3	1872100	1722900	149170
	141	E5RJN7;E7EVI1;Q9NUL3-6;Q9NUL3-8;Q9NUL3-3;F8VPI7;E7EPX0;Q9NUL3-7;E7EVJ4;Q9NUL3-2;E9PH62;Q9NUL3;E5RFK1;G5EA18;Q9NUL3-4	STAU2	Double-stranded RNA-binding protein Staufen homolog 2	>tr|E5RJN7|E5RJN7_HUMAN Double-stranded RNA-binding protein Staufen homolog 2 (Fragment) OS=Homo sapiens GN=STAU2 PE=1 SV=1;>tr|E7EVI1|E7EVI1_HUMAN Double-stranded RNA-binding protein Staufen homolog 2 OS=Homo sapiens GN=STAU2 PE=1 SV=1;>sp|Q9NUL3-6|STAU2_	34.861	1.2314e-06	15		1.00263	0.00114203	0.480755	0.318076	4.1	1	1	0.77771	NaN	1	231330	132430	98899	7.2	2	2	1.0401	12.09	2	542690	254210	288480	0	0	0			0	0	0	0	4.1	1	1	1.24604	NaN	1	377740	199060	178680
	384	P01040;C9J0E4	CSTA	Cystatin-A	>sp|P01040|CYTA_HUMAN Cystatin-A OS=Homo sapiens GN=CSTA PE=1 SV=1;>tr|C9J0E4|C9J0E4_HUMAN Cystatin-A OS=Homo sapiens GN=CSTA PE=1 SV=1	11.006	6.258e-59	2		1.09557	0.0396385	0.48183	0.317106	14.3	1	1			0	255530	255530	0	44.9	3	3	0.21792	23.606	2	5782400	5465200	317190	38.8	3	3			0	798220	798220	0	57.1	4	4	5.50782	84.574	3	3203200	2990600	212600
	146	P19367-4;P19367-2;P19367;P19367-3;E7ENR4;B1AR63;B1AR62;B1AR61;E9PB90;P52789	HK1	Hexokinase-1	>sp|P19367-4|HXK1_HUMAN Isoform 4 of Hexokinase-1 OS=Homo sapiens GN=HK1;>sp|P19367-2|HXK1_HUMAN Isoform 2 of Hexokinase-1 OS=Homo sapiens GN=HK1;>sp|P19367|HXK1_HUMAN Hexokinase-1 OS=Homo sapiens GN=HK1 PE=1 SV=3;>sp|P19367-3|HXK1_HUMAN Isoform 3 of Hexok	101.08	2.3761e-168	10		1.00316	0.00137067	0.484633	0.314587	6.7	5	5	0.82377	54.592	5	1441900	759750	682160	2.9	2	2	0.75832	8.7852	2	462320	187640	274680	24.5	16	16	1.24662	23.729	20	10853000	5915400	4938000	20.8	14	14	1.30044	15.766	13	7781900	4357400	3424500
	628	P67809;H0Y449;Q9Y2T7;C9J5V9	YBX1	Nuclease-sensitive element-binding protein 1	>sp|P67809|YBOX1_HUMAN Nuclease-sensitive element-binding protein 1 OS=Homo sapiens GN=YBX1 PE=1 SV=3;>tr|H0Y449|H0Y449_HUMAN Nuclease-sensitive element-binding protein 1 (Fragment) OS=Homo sapiens GN=YBX1 PE=1 SV=1	35.924	0	4		1.00486	0.00210612	0.485272	0.314015	25.9	8	4	0.75085	78.164	9	5944800	3625600	2319200	34.9	8	4	0.81528	53.946	15	6443000	3494700	2948300	34.9	10	4	1.28138	64.16	9	5725300	3123400	2601800	37.7	9	5	1.29983	57.468	11	10256000	5672900	4583500
	432	P09874;Q5VX84;Q5VX85	PARP1	Poly [ADP-ribose] polymerase 1	>sp|P09874|PARP1_HUMAN Poly [ADP-ribose] polymerase 1 OS=Homo sapiens GN=PARP1 PE=1 SV=4	113.08	3.8378e-53	3		1.0059	0.00255289	0.491979	0.308053	10.3	8	8	0.60135	29.599	19	8980100	5332900	3647200	4.7	4	4	0.67345	13.654	6	3196400	1891900	1304600	8.8	7	7	1.61972	26.446	18	5647800	3405200	2242600	6.4	5	5	1.56077	30.308	10	5092800	3044100	2048700
	410	P05089;P05089-2;P05089-3	ARG1	Arginase-1	>sp|P05089|ARGI1_HUMAN Arginase-1 OS=Homo sapiens GN=ARG1 PE=1 SV=2;>sp|P05089-2|ARGI1_HUMAN Isoform 2 of Arginase-1 OS=Homo sapiens GN=ARG1;>sp|P05089-3|ARGI1_HUMAN Isoform 3 of Arginase-1 OS=Homo sapiens GN=ARG1	34.735	9.0608e-42	3		1.01746	0.00751733	0.492284	0.307784	18.6	5	5	0.30019	63.004	5	3285600	2906400	379200	6.8	2	2	0.2318	36.583	3	2383300	2106800	276440	11.8	3	3	2.00803	117.87	6	2766600	1856100	910440	24.2	6	6	7.66989	130.9	10	9078100	8191200	886890
	387	P01625;P06312;P06313;P06314;P83593	IGKV4-1	Ig kappa chain V-IV region Len;Ig kappa chain V-IV region;Ig kappa chain V-IV region JI;Ig kappa chain V-IV region B17	>sp|P01625|KV402_HUMAN Ig kappa chain V-IV region Len OS=Homo sapiens PE=1 SV=2;>sp|P06312|KV401_HUMAN Ig kappa chain V-IV region (Fragment) OS=Homo sapiens GN=IGKV4-1 PE=4 SV=1;>sp|P06313|KV403_HUMAN Ig kappa chain V-IV region JI OS=Homo sapiens PE=4 SV=1	12.64	1.0303e-15	5		1.02328	0.0099962	0.492954	0.307194	15.8	2	2	0.2212	NaN	1	77615000	77128000	486770	21.1	3	3	0.0866	197.59	4	85104000	84503000	601150	21.1	3	3	14.4411	97.098	3	69772000	69507000	265740	21.1	3	3	3.96354	NaN	1	62355000	62293000	61837
	595	P61163;F5H3I4;B4DXP9;R4GMT0;P42025	ACTR1A;ACTR1B	Alpha-centractin;Beta-centractin	>sp|P61163|ACTZ_HUMAN Alpha-centractin OS=Homo sapiens GN=ACTR1A PE=1 SV=1;>tr|F5H3I4|F5H3I4_HUMAN Alpha-centractin OS=Homo sapiens GN=ACTR1A PE=1 SV=1;>tr|B4DXP9|B4DXP9_HUMAN Alpha-centractin OS=Homo sapiens GN=ACTR1A PE=1 SV=1;>tr|R4GMT0|R4GMT0_HUMAN Alp	42.613	1.2179e-27	5		1.0055	0.00238137	0.5	0.30103	0	0	0			0	0	0	0	12	3	3	0.94025	22.278	3	3945200	1938200	2007000	6.9	2	2	1.00924	NaN	1	483610	257890	225710	11.4	3	3	1.07128	55.584	3	3803700	1861800	1941900
	992	Q9NZJ5;C9J185;E7ER02	EIF2AK3	Eukaryotic translation initiation factor 2-alpha kinase 3	>sp|Q9NZJ5|E2AK3_HUMAN Eukaryotic translation initiation factor 2-alpha kinase 3 OS=Homo sapiens GN=EIF2AK3 PE=1 SV=3;>tr|C9J185|C9J185_HUMAN Eukaryotic translation initiation factor 2-alpha kinase 3 (Fragment) OS=Homo sapiens GN=EIF2AK3 PE=1 SV=1;>tr|E7ER	125.21	3.472e-25	3		1.00214	0.00092908	0.5	0.30103	2.7	3	3	1.0037	21.617	3	1332200	592540	739640	3.7	4	4	1.0738	7.414	4	2347600	1081300	1266400	2.1	2	2	0.860807	59.243	4	2031800	1155800	875900	4.5	5	5	1.08713	40.909	11	4895500	2502000	2393500
	415	P05388;F8VU65;P05388-2;F8VWS0;F8VPE8;G3V210;F8VW21;Q8NHW5;F8VQY6;F8VRK7;F8VZS0;F8VS58;F8VWV4;F8W1K8	RPLP0;RPLP0P6	60S acidic ribosomal protein P0;60S acidic ribosomal protein P0-like	>sp|P05388|RLA0_HUMAN 60S acidic ribosomal protein P0 OS=Homo sapiens GN=RPLP0 PE=1 SV=1;>tr|F8VU65|F8VU65_HUMAN 60S acidic ribosomal protein P0 (Fragment) OS=Homo sapiens GN=RPLP0 PE=1 SV=1;>sp|P05388-2|RLA0_HUMAN Isoform 2 of 60S acidic ribosomal protein	34.273	2.2912e-108	14		0.997659	-0.00101769	0.5	0.30103	22.7	6	6	0.90267	34.38	6	15472000	8053300	7418400	22.7	6	6	0.87546	63.257	15	10639000	5577100	5061700	26.5	7	7	1.12773	16.668	7	17587000	9176300	8411200	33.4	8	8	1.11163	29.043	8	29602000	15437000	14166000
	576	P52732	KIF11	Kinesin-like protein KIF11	>sp|P52732|KIF11_HUMAN Kinesin-like protein KIF11 OS=Homo sapiens GN=KIF11 PE=1 SV=2	119.16	0	1		0.997978	-0.000878922	0.5	0.30103	65.2	80	80	0.89059	28.985	364	2014400000	1028000000	986350000	61.2	74	74	0.89344	32.779	300	1562400000	802720000	759690000	60.8	77	77	1.12135	34.997	362	1456900000	762640000	694280000	58.6	73	73	1.11173	36.681	359	2452800000	1275500000	1177300000
	244	H7BZJ3	PDIA3	Thioredoxin	>tr|H7BZJ3|H7BZJ3_HUMAN Protein disulfide-isomerase A3 (Fragment) OS=Homo sapiens GN=PDIA3 PE=1 SV=1	13.519	6.1049e-44	1		1.00176	0.000762518	0.5	0.30103	28.5	3	1	0.85945	NaN	1	619280	325700	293580	28.5	3	1	0.98028	NaN	1	518610	230380	288230	20.3	2	1	1.16261	NaN	1	334510	173720	160780	28.5	3	1	1.02812	NaN	1	573340	242130	331210
	192	Q9H2U1-2;F5GZS0;Q9H2U1;Q9H2U1-3;E7EWK3;H7C5F5;H7C514	DHX36	Probable ATP-dependent RNA helicase DHX36	>sp|Q9H2U1-2|DHX36_HUMAN Isoform 2 of ATP-dependent RNA helicase DHX36 OS=Homo sapiens GN=DHX36;>tr|F5GZS0|F5GZS0_HUMAN ATP-dependent RNA helicase DHX36 OS=Homo sapiens GN=DHX36 PE=1 SV=1;>sp|Q9H2U1|DHX36_HUMAN ATP-dependent RNA helicase DHX36 OS=Homo sapi	113.15	1.8515e-102	7		0.998783	-0.000528794	0.5	0.30103	13.5	12	10	0.90507	25.165	11	3326700	1526300	1800400	8.4	8	7	0.97715	26.42	10	3491300	1850600	1640700	12.8	10	9	0.995818	28.327	11	2783500	1305900	1477600	11.6	10	10	1.12996	45.792	14	6164000	3232900	2931100
	611	P62314;J3QLI9;J3QLR7	SNRPD1	Small nuclear ribonucleoprotein Sm D1	>sp|P62314|SMD1_HUMAN Small nuclear ribonucleoprotein Sm D1 OS=Homo sapiens GN=SNRPD1 PE=1 SV=1;>tr|J3QLI9|J3QLI9_HUMAN Small nuclear ribonucleoprotein Sm D1 OS=Homo sapiens GN=SNRPD1 PE=1 SV=1	13.281	8.734e-51	3		0.99884	-0.000504093	0.5	0.30103	10.9	1	1	0.74451	NaN	1	1337500	682850	654610	54.6	4	4	1.0624	23.943	5	7538600	3639600	3898900	37	3	3	1.10516	43.514	4	2136300	1163700	972590	37.8	3	3	1.13868	26.657	4	6747600	3560700	3186900
	131	D6R9P3;D6RD18;Q99729-3;Q99729-4;D6RBZ0;Q99729-2;Q99729	HNRNPAB	Heterogeneous nuclear ribonucleoprotein A/B	>tr|D6R9P3|D6R9P3_HUMAN Heterogeneous nuclear ribonucleoprotein A/B OS=Homo sapiens GN=HNRNPAB PE=1 SV=1;>tr|D6RD18|D6RD18_HUMAN Heterogeneous nuclear ribonucleoprotein A/B OS=Homo sapiens GN=HNRNPAB PE=1 SV=1;>sp|Q99729-3|ROAA_HUMAN Isoform 3 of Heterogen	30.302	1.7186e-08	7		0.989602	-0.00453928	0.512254	0.290515	0	0	0			0	0	0	0	2.9	1	1	0.63832	NaN	1	825320	478050	347270	7.5	2	2	1.12994	129.18	2	919950	537010	382940	7.5	2	2	1.34365	146.44	3	2201100	1064300	1136800
	732	Q96P63;Q3SYB4	SERPINB12	Serpin B12	>sp|Q96P63|SPB12_HUMAN Serpin B12 OS=Homo sapiens GN=SERPINB12 PE=1 SV=1;>tr|Q3SYB4|Q3SYB4_HUMAN SERPINB12 protein OS=Homo sapiens GN=SERPINB12 PE=2 SV=1	46.276	3.6482e-63	2		0.94168	-0.0260969	0.513658	0.289326	21	6	6	0.057722	71.994	4	4924500	4801900	122630	16.8	5	5	0.043763	67.467	3	5201700	5140700	61003	23.5	7	7	11.0059	124.51	5	4895700	4796800	98829	20.2	7	7	28.2837	128.06	5	11730000	11477000	253480
	149	E7EQ72;Q15363;F5GX39	TMED2	Transmembrane emp24 domain-containing protein 2	>tr|E7EQ72|E7EQ72_HUMAN Transmembrane emp24 domain-containing protein 2 (Fragment) OS=Homo sapiens GN=TMED2 PE=1 SV=2;>sp|Q15363|TMED2_HUMAN Transmembrane emp24 domain-containing protein 2 OS=Homo sapiens GN=TMED2 PE=1 SV=1;>tr|F5GX39|F5GX39_HUMAN Transmem	18.488	1.8492e-10	3		0.995043	-0.00215808	0.518911	0.284907	7.8	1	1	0.89856	NaN	1	708800	397930	310880	15.1	2	2	0.83007	23.368	2	707550	381250	326300	5.4	1	1	1.32088	NaN	1	173780	100060	73723	0	0	0			0	0	0	0
	463	P15924;P15924-3;P15924-2	DSP	Desmoplakin	>sp|P15924|DESP_HUMAN Desmoplakin OS=Homo sapiens GN=DSP PE=1 SV=3;>sp|P15924-3|DESP_HUMAN Isoform DSPIa of Desmoplakin OS=Homo sapiens GN=DSP;>sp|P15924-2|DESP_HUMAN Isoform DPII of Desmoplakin OS=Homo sapiens GN=DSP	331.77	0	3		0.927732	-0.0325775	0.519369	0.284524	22.2	48	48	0.065392	89.725	30	45929000	44133000	1796600	17.2	34	34	0.098826	122.57	24	34185000	32338000	1846200	21.8	51	51	13.9801	117.55	35	35120000	33471000	1648900	22.7	49	49	8.19941	138.26	52	76221000	63917000	12304000
	202	F8WCY6;F8WD79;F8VPW9;F8VSF8;F8VWZ7;F8VWU4;F8VVZ0;F8VUA5;F8VVK3;K7ERI8;P61020-2;P20339-2;P61020;P20339;P51148;P51148-2;K7ERQ8	RAB5A;RAB5B;RAB5C	Ras-related protein Rab-5B;Ras-related protein Rab-5A;Ras-related protein Rab-5C	>tr|F8WCY6|F8WCY6_HUMAN Ras-related protein Rab-5A OS=Homo sapiens GN=RAB5A PE=1 SV=1;>tr|F8WD79|F8WD79_HUMAN Ras-related protein Rab-5A OS=Homo sapiens GN=RAB5A PE=1 SV=1;>tr|F8VPW9|F8VPW9_HUMAN Ras-related protein Rab-5B OS=Homo sapiens GN=RAB5B PE=1 SV=	6.8159	0.0015183	17		0.97768	-0.00980341	0.522698	0.281749	17.7	1	1	0.71458	NaN	1	628340	365800	262540	0	0	0			0	0	0	0	0	0	0			0	0	0	0	17.7	1	1	1.33765	NaN	1	1245600	728230	517370
	29	O00303;B3KSH1;B4DEW9;H0YDT6;E9PQV8	EIF3F	Eukaryotic translation initiation factor 3 subunit F	>sp|O00303|EIF3F_HUMAN Eukaryotic translation initiation factor 3 subunit F OS=Homo sapiens GN=EIF3F PE=1 SV=1;>tr|B3KSH1|B3KSH1_HUMAN Eukaryotic translation initiation factor 3 subunit F OS=Homo sapiens GN=EIF3F PE=1 SV=1;>tr|B4DEW9|B4DEW9_HUMAN Eukaryoti	37.563	3.0486e-57	5		0.988044	-0.00522361	0.523973	0.280691	9	2	2	0.8066	26.923	2	3111000	1681500	1429500	16.5	4	4	0.99552	39.176	4	6340500	3359700	2980900	9.5	2	2	1.20122	86.243	2	776590	400960	375630	0	0	0			0	0	0	0
	87	Q9Y4F1;Q9Y4F1-2;C9JME2;H0Y783;M0QXT1	FARP1	FERM, RhoGEF and pleckstrin domain-containing protein 1	>sp|Q9Y4F1|FARP1_HUMAN FERM, RhoGEF and pleckstrin domain-containing protein 1 OS=Homo sapiens GN=FARP1 PE=1 SV=1;>sp|Q9Y4F1-2|FARP1_HUMAN Isoform 2 of FERM, RhoGEF and pleckstrin domain-containing protein 1 OS=Homo sapiens GN=FARP1;>tr|C9JME2|C9JME2_HUMAN	118.63	2.0965e-05	5		0.975258	-0.0108804	0.524438	0.280306	1.2	1	1	0.72145	NaN	1	294900	168880	126020	0	0	0			0	0	0	0	0	0	0			0	0	0	0	2.7	2	2	1.31836	NaN	1	377200	233830	143380
	66	H7C2W9;C9JU56;B7Z4E3;P62899-3;P62899;P62899-2;B7Z4C8;B8ZZK4	RPL31	60S ribosomal protein L31	>tr|H7C2W9|H7C2W9_HUMAN 60S ribosomal protein L31 (Fragment) OS=Homo sapiens GN=RPL31 PE=1 SV=1;>tr|C9JU56|C9JU56_HUMAN 60S ribosomal protein L31 (Fragment) OS=Homo sapiens GN=RPL31 PE=1 SV=1;>tr|B7Z4E3|B7Z4E3_HUMAN 60S ribosomal protein L31 OS=Homo sapien	12.701	3.1011e-20	8		0.990023	-0.00435454	0.525237	0.279645	8.3	1	1	0.64825	NaN	1	766250	494430	271820	28.7	3	3	0.89339	93.807	3	3208500	1652800	1555600	16.7	2	2	1.21823	78.227	2	1418100	838380	579740	21.3	2	2	1.36166	92.21	2	2943600	1794000	1149600
	887	Q96JB5;Q96JB5-4;J3QQY1;Q96JB5-2;J3KRI2;J3KRK4;J3QL86;J3KS63;J3QS62;J3QRM1;Q96JB5-3;J3QL95	CDK5RAP3	CDK5 regulatory subunit-associated protein 3	>sp|Q96JB5|CK5P3_HUMAN CDK5 regulatory subunit-associated protein 3 OS=Homo sapiens GN=CDK5RAP3 PE=1 SV=2;>sp|Q96JB5-4|CK5P3_HUMAN Isoform 4 of CDK5 regulatory subunit-associated protein 3 OS=Homo sapiens GN=CDK5RAP3;>tr|J3QQY1|J3QQY1_HUMAN CDK5 regulatory	56.92	5.3397e-13	12		0.99627	-0.00162285	0.526246	0.278811	3.6	2	2	1.0256	31.826	2	397870	203720	194150	6.9	3	3	0.81047	29.056	3	741540	391530	350020	2	1	1	1.21175	NaN	1	82873	43802	39071	7.5	4	4	0.978091	12.064	3	817900	444840	373060
	71	B8ZZA3;Q16719-2;Q16719	KYNU	Kynureninase	>tr|B8ZZA3|B8ZZA3_HUMAN Kynureninase OS=Homo sapiens GN=KYNU PE=1 SV=1;>sp|Q16719-2|KYNU_HUMAN Isoform 2 of Kynureninase OS=Homo sapiens GN=KYNU;>sp|Q16719|KYNU_HUMAN Kynureninase OS=Homo sapiens GN=KYNU PE=1 SV=1	16.732	0.0012956	3		0.943544	-0.0252379	0.5295	0.276134	11.5	1	1	0.76017	111.99	2	5145300	3825800	1319500	11.5	1	1	0.14182	199.13	3	6455900	5516500	939310	11.5	1	1	3.87012	61.302	4	5204400	4275100	929230	11.5	1	1	1.89966	49.574	4	8645300	6773700	1871600
	665	Q08211;Q08211-2	DHX9	ATP-dependent RNA helicase A	>sp|Q08211|DHX9_HUMAN ATP-dependent RNA helicase A OS=Homo sapiens GN=DHX9 PE=1 SV=4	140.96	0	2		0.999311	-0.000299284	0.532992	0.273279	27.3	29	29	0.86925	32.696	38	86282000	45474000	40808000	32.6	33	33	0.91314	32.732	46	67382000	34601000	32781000	38.3	38	38	1.13465	30.252	48	68083000	35625000	32457000	31.9	33	33	1.10728	35.808	42	91352000	47900000	43452000
	996	Q9P0L0;Q9P0L0-2	VAPA	Vesicle-associated membrane protein-associated protein A	>sp|Q9P0L0|VAPA_HUMAN Vesicle-associated membrane protein-associated protein A OS=Homo sapiens GN=VAPA PE=1 SV=3;>sp|Q9P0L0-2|VAPA_HUMAN Isoform 2 of Vesicle-associated membrane protein-associated protein A OS=Homo sapiens GN=VAPA	27.893	2.7163e-09	2		0.99728	-0.00118286	0.534921	0.27171	11.2	2	1	0.94107	19.729	3	963110	470060	493050	11.2	2	1	0.88657	71.704	4	1252300	660770	591550	6.4	1	1	1.17754	NaN	1	239380	122900	116480	11.2	2	1	1.00684	59.459	3	710990	364580	346410
	968	Q9NRW3;Q6ICH2;Q8IUX4;Q96AK3	APOBEC3C	DNA dC->dU-editing enzyme APOBEC-3C	>sp|Q9NRW3|ABC3C_HUMAN DNA dC->dU-editing enzyme APOBEC-3C OS=Homo sapiens GN=APOBEC3C PE=1 SV=2	22.826	5.1124e-44	4		0.977829	-0.00973717	0.536305	0.270588	0	0	0			0	0	0	0	15.3	2	2	0.6314	11.786	3	864500	499660	364840	35.3	5	5	1.31339	106.88	6	2806200	1603500	1202700	13.2	2	2	1.12743	44.38	4	2342800	1153100	1189700
	417	P06702	S100A9	Protein S100-A9	>sp|P06702|S10A9_HUMAN Protein S100-A9 OS=Homo sapiens GN=S100A9 PE=1 SV=1	13.242	2.3109e-99	1		0.849958	-0.0706026	0.548965	0.260455	36	3	3	0.11577	101.69	5	3859900	3514500	345410	36	3	3	0.085669	93.793	5	5058000	4885200	172770	31.6	3	3	9.94036	88.059	6	2307400	2183500	123880	45.6	5	5	5.29381	127.47	16	20657000	18974000	1682900
	84	C9JB90;C9JU14;J3KR73;H7BYW1;P20340-4;Q9NRW1-2;H0YGL6;Q9NRW1;P20340-2;P20340;Q14964	RAB6B;RAB6A;RAB39A	Ras-related protein Rab-6B;Ras-related protein Rab-6A;Ras-related protein Rab-39A	>tr|C9JB90|C9JB90_HUMAN Ras-related protein Rab-6B (Fragment) OS=Homo sapiens GN=RAB6B PE=4 SV=1;>tr|C9JU14|C9JU14_HUMAN Ras-related protein Rab-6B (Fragment) OS=Homo sapiens GN=RAB6B PE=4 SV=3;>tr|J3KR73|J3KR73_HUMAN Ras-related protein Rab-6B (Fragment)	5.8575	1.1212e-05	11		0.958494	-0.0184105	0.560783	0.251205	22.4	1	1	0.60361	NaN	1	2906100	1689700	1216400	22.4	1	1	0.96477	NaN	1	3640600	2135900	1504600	22.4	1	1	1.51213	NaN	1	2323500	1224000	1099600	0	0	0			0	0	0	0
	5	A2RRP1-2;A2RRP1	NBAS	Neuroblastoma-amplified sequence	>sp|A2RRP1-2|NBAS_HUMAN Isoform 2 of Neuroblastoma-amplified sequence OS=Homo sapiens GN=NBAS;>sp|A2RRP1|NBAS_HUMAN Neuroblastoma-amplified sequence OS=Homo sapiens GN=NBAS PE=1 SV=2	254.81	0.00066212	2		0.982144	-0.00782483	0.562834	0.24962	0.5	1	1	0.8754	NaN	1	153440	81975	71464	0	0	0			0	0	0	0	0.5	1	1	1.1019	NaN	1	97585	53893	43691	0	0	0			0	0	0	0
	407	P04844-2;P04844;Q5JYR7;Q5JYR4;F2Z3K5;Q5JYR3;H0Y5M1	RPN2	Dolichyl-diphosphooligosaccharide--protein glycosyltransferase subunit 2	>sp|P04844-2|RPN2_HUMAN Isoform 2 of Dolichyl-diphosphooligosaccharide--protein glycosyltransferase subunit 2 OS=Homo sapiens GN=RPN2;>sp|P04844|RPN2_HUMAN Dolichyl-diphosphooligosaccharide--protein glycosyltransferase subunit 2 OS=Homo sapiens GN=RPN2 PE=	67.723	2.105e-164	7		0.988286	-0.00511719	0.562932	0.249544	34.3	13	13	0.9519	14.194	14	6389700	3255800	3133800	29.9	13	13	0.83676	12.206	13	6958900	3703500	3255300	28.1	10	10	1.12841	12.399	10	3511400	1815500	1695900	26.2	9	9	1.06138	11.461	9	5322100	2567700	2754500
	591	P59666;P59665	DEFA3;DEFA1	Neutrophil defensin 3;HP 3-56;Neutrophil defensin 2;Neutrophil defensin 1;HP 1-56;Neutrophil defensin 2	>sp|P59666|DEF3_HUMAN Neutrophil defensin 3 OS=Homo sapiens GN=DEFA3 PE=1 SV=1;>sp|P59665|DEF1_HUMAN Neutrophil defensin 1 OS=Homo sapiens GN=DEFA1 PE=1 SV=1	10.245	4.423e-06	2		0.773136	-0.111744	0.562948	0.249532	19.1	2	2	0.074009	73.914	9	6959200	6764800	194380	9.6	1	1	0.044873	NaN	1	4691100	4665700	25450	19.1	2	2	9.76467	67.584	5	5692100	5425000	267100	19.1	2	2	11.0178	78.857	7	5729200	5497300	231970
	783	Q71DI3;K7EMV3;K7EP01;B4DEB1;K7EK07;Q6NXT2;Q5TEC6;Q16695;P84243;P68431;K7ES00	HIST2H3A;H3F3B;H3F3A;H3F3C;HIST2H3PS2;HIST3H3;HIST1H3A	Histone H3.2;Histone H3;Histone H3.3C;Histone H3.1t;Histone H3.3;Histone H3.1	>sp|Q71DI3|H32_HUMAN Histone H3.2 OS=Homo sapiens GN=HIST2H3A PE=1 SV=3;>tr|K7EMV3|K7EMV3_HUMAN Histone H3 OS=Homo sapiens GN=H3F3B PE=1 SV=1;>tr|K7EP01|K7EP01_HUMAN Histone H3.3 OS=Homo sapiens GN=H3F3B PE=1 SV=1;>tr|B4DEB1|B4DEB1_HUMAN Histone H3 OS=Homo	15.388	1.2482e-05	11		0.946154	-0.0240383	0.564621	0.248243	5.1	1	1	1.6972	NaN	1	2058100	806930	1251200	5.1	1	1	1.284	8.4732	2	3343800	1551500	1792300	5.1	1	1	0.381942	NaN	1	1602600	448100	1154500	28.7	2	2	0.962835	16.01	2	2489900	1254300	1235600
	890	Q96QR8	PURB	Transcriptional activator protein Pur-beta	>sp|Q96QR8|PURB_HUMAN Transcriptional activator protein Pur-beta OS=Homo sapiens GN=PURB PE=1 SV=3	33.24	9.9986e-16	1		0.962328	-0.0166769	0.569604	0.244427	4.2	1	1	0.78358	NaN	1	282830	144150	138680	0	0	0			0	0	0	0	4.5	1	1	1.18185	NaN	1	172000	88191	83813	0	0	0			0	0	0	0
	484	P22626-2;P22626	HNRNPA2B1	Heterogeneous nuclear ribonucleoproteins A2/B1	>sp|P22626-2|ROA2_HUMAN Isoform A2 of Heterogeneous nuclear ribonucleoproteins A2/B1 OS=Homo sapiens GN=HNRNPA2B1;>sp|P22626|ROA2_HUMAN Heterogeneous nuclear ribonucleoproteins A2/B1 OS=Homo sapiens GN=HNRNPA2B1 PE=1 SV=2	36.006	3.3683e-19	2		0.95653	-0.0193014	0.570427	0.2438	9.1	2	2	0.87334	NaN	1	469030	235490	233540	7.9	2	2	0.51019	42.292	2	1010500	683490	327060	8.2	2	2	1.21272	47.858	4	500160	281270	218880	11.7	3	3	1.54923	15.988	4	1935100	1073300	861750
	583	P55010	EIF5	Eukaryotic translation initiation factor 5	>sp|P55010|IF5_HUMAN Eukaryotic translation initiation factor 5 OS=Homo sapiens GN=EIF5 PE=1 SV=2	49.222	0.00058998	1		0.663586	-0.178103	0.576405	0.239272	2.3	1	1	3.4388	NaN	1	408560	81746	326810	0	0	0			0	0	0	0	4.4	1	1	0.128052	NaN	1	31187000	2366900	28820000	0	0	0			0	0	0	0
	316	O15371-2;O15371-3;O15371;B0QYA5;B0QYA6;B0QYA7;B0QYA4;B0QYA8	EIF3D	Eukaryotic translation initiation factor 3 subunit D	>sp|O15371-2|EIF3D_HUMAN Isoform 2 of Eukaryotic translation initiation factor 3 subunit D OS=Homo sapiens GN=EIF3D;>sp|O15371-3|EIF3D_HUMAN Isoform 3 of Eukaryotic translation initiation factor 3 subunit D OS=Homo sapiens GN=EIF3D;>sp|O15371|EIF3D_HUMAN E	58.14	6.8833e-12	8		0.978457	-0.00945807	0.580311	0.236339	7.2	3	3	0.8079	18.246	5	2140600	1086100	1054500	4.8	2	2	0.9187	11.488	2	2179200	1209200	970000	4.6	2	2	1.30827	70.379	3	843810	495540	348270	2	1	1	0.943931	6.8486	2	1312500	592370	720160
	580	P53999	SUB1	Activated RNA polymerase II transcriptional coactivator p15	>sp|P53999|TCP4_HUMAN Activated RNA polymerase II transcriptional coactivator p15 OS=Homo sapiens GN=SUB1 PE=1 SV=3	14.395	2.2949e-07	1		0.933825	-0.0297344	0.580524	0.23618	8.7	1	1	0.68467	NaN	1	1408100	791570	616540	8.7	1	1	0.69566	NaN	1	1070500	655320	415160	0	0	0			0	0	0	0	18.9	2	2	1.70969	70.511	3	3237300	1850900	1386400
	653	Q00839;Q00839-2;Q5RI18	HNRNPU	Heterogeneous nuclear ribonucleoprotein U	>sp|Q00839|HNRPU_HUMAN Heterogeneous nuclear ribonucleoprotein U OS=Homo sapiens GN=HNRNPU PE=1 SV=6;>sp|Q00839-2|HNRPU_HUMAN Isoform Short of Heterogeneous nuclear ribonucleoprotein U OS=Homo sapiens GN=HNRNPU	90.583	0	3		0.985473	-0.00635528	0.581361	0.235554	44.8	40	40	0.87802	28.488	89	248960000	129580000	119380000	44.8	35	35	0.85428	27.378	95	232780000	124170000	108610000	38.4	32	32	1.10391	36.603	98	283710000	146120000	137590000	41.5	36	36	1.13904	32.956	96	408170000	211250000	196930000
	1002	Q9P2D3;Q9P2D3-3;Q9P2D3-2	HEATR5B	HEAT repeat-containing protein 5B	>sp|Q9P2D3|HTR5B_HUMAN HEAT repeat-containing protein 5B OS=Homo sapiens GN=HEATR5B PE=1 SV=2;>sp|Q9P2D3-3|HTR5B_HUMAN Isoform 3 of HEAT repeat-containing protein 5B OS=Homo sapiens GN=HEATR5B	224.3	1.2335e-23	3		0.960404	-0.0175459	0.581847	0.235191	1.9	3	3	0.65445	18.351	3	622000	362770	259230	1.3	2	2	0.78471	7.5586	2	382750	177730	205030	1.4	2	2	1.14529	10.951	2	236900	109940	126960	2.6	5	5	1.44649	21.481	5	1313100	718060	595030
	622	P62979;J3QS39;J3QTR3;F5H6Q2;P62987;F5GYU3;F5H2Z3;F5H265;B4DV12;F5H388;F5H747;F5GXK7;J3QKN0;P0CG47;Q96C32;F5H041;P0CG48;M0R1V7;M0R1M6;M0R2S1;J3QLP7;J3QRK5;J3QSA3;K7EMA8;F5GZ39;J3KSM4	RPS27A;UBB;UBC;UBA52;UBBP4	Ubiquitin-40S ribosomal protein S27a;Ubiquitin;40S ribosomal protein S27a;Ubiquitin-60S ribosomal protein L40;Ubiquitin;60S ribosomal protein L40;Polyubiquitin-B;Ubiquitin;Polyubiquitin-C;Ubiquitin	>sp|P62979|RS27A_HUMAN Ubiquitin-40S ribosomal protein S27a OS=Homo sapiens GN=RPS27A PE=1 SV=2;>tr|J3QS39|J3QS39_HUMAN Ubiquitin (Fragment) OS=Homo sapiens GN=UBB PE=4 SV=1;>tr|J3QTR3|J3QTR3_HUMAN Ubiquitin (Fragment) OS=Homo sapiens GN=RPS27A PE=1 SV=1;>	17.965	1.2244e-48	26		0.948056	-0.0231658	0.583812	0.233727	30.1	4	4	0.65311	90.139	31	44312000	26242000	18070000	30.1	4	4	0.59512	98.214	30	53899000	33418000	20481000	30.1	4	4	1.31963	54.126	37	37376000	21458000	15918000	38.5	5	5	1.57505	65.908	44	65305000	39665000	25640000
	870	Q96DA0;I3L1H9;I3L3X0	ZG16B	Zymogen granule protein 16 homolog B	>sp|Q96DA0|ZG16B_HUMAN Zymogen granule protein 16 homolog B OS=Homo sapiens GN=ZG16B PE=1 SV=3;>tr|I3L1H9|I3L1H9_HUMAN Zymogen granule protein 16 homolog B (Fragment) OS=Homo sapiens GN=ZG16B PE=4 SV=1;>tr|I3L3X0|I3L3X0_HUMAN Zymogen granule protein 16 hom	22.739	1.2796e-12	3		0.408414	-0.388899	0.585895	0.23218	0	0	0			0	0	0	0	4.8	1	1	0.015987	NaN	1	308090	306180	1908.4	0	0	0			0	0	0	0	9.1	2	2	10.4336	NaN	1	2212300	2178600	33740
	279	R4GNE4;K7ERP4;P36969-2;K7ENB4;K7EKX7;P36969;K7EJ20	GPX4	Glutathione peroxidase;Phospholipid hydroperoxide glutathione peroxidase, mitochondrial	>tr|R4GNE4|R4GNE4_HUMAN Glutathione peroxidase (Fragment) OS=Homo sapiens GN=GPX4 PE=1 SV=1;>tr|K7ERP4|K7ERP4_HUMAN Glutathione peroxidase (Fragment) OS=Homo sapiens GN=GPX4 PE=1 SV=1;>sp|P36969-2|GPX4_HUMAN Isoform Cytoplasmic of Phospholipid hydroperoxid	16.807	1.0154e-08	7		0.982281	-0.00776427	0.586173	0.231974	9.7	1	1	1.0497	NaN	1	857370	401520	455850	0	0	0			0	0	0	0	9.7	1	1	0.816127	NaN	1	452720	245200	207510	7.6	1	1	1.10633	74.029	2	986290	437000	549290
	49	Q9UBF9-2;B4DT68;Q9UBF9	MYOT	Myotilin	>sp|Q9UBF9-2|MYOTI_HUMAN Isoform 2 of Myotilin OS=Homo sapiens GN=MYOT;>tr|B4DT68|B4DT68_HUMAN Myotilin OS=Homo sapiens GN=MYOT PE=2 SV=1;>sp|Q9UBF9|MYOTI_HUMAN Myotilin OS=Homo sapiens GN=MYOT PE=1 SV=2	35.146	1.1381e-25	3		0.722778	-0.140995	0.596271	0.224556	15.3	5	5	0.080099	158.88	7	15699000	14890000	809000	11.5	3	3	0.091995	128.25	3	9482300	9402500	79812	11.5	3	3	5.86545	174.96	3	8067100	7848000	219150	11.5	3	3	6.31433	131.68	5	11420000	11218000	202540
	1015	Q9UPQ9-1;Q9UPQ9;H0Y720;Q9UPQ9-2	TNRC6B	Trinucleotide repeat-containing gene 6B protein	>sp|Q9UPQ9-1|TNR6B_HUMAN Isoform 2 of Trinucleotide repeat-containing gene 6B protein OS=Homo sapiens GN=TNRC6B;>sp|Q9UPQ9|TNR6B_HUMAN Trinucleotide repeat-containing gene 6B protein OS=Homo sapiens GN=TNRC6B PE=1 SV=4;>tr|H0Y720|H0Y720_HUMAN Trinucleotide	182.81	5.9088e-131	4		0.989954	-0.00438496	0.597841	0.223414	9.5	10	10	0.96338	17.667	10	4066900	2080500	1986400	11.7	13	13	0.88511	23.909	13	5192200	2568800	2623300	8.5	10	10	1.0507	22.097	11	3228900	1647900	1581000	8.6	10	10	1.07198	23.119	10	4523800	2317500	2206300
	390	P01859;P01861;P01860	IGHG2;IGHG4;IGHG3	Ig gamma-2 chain C region;Ig gamma-4 chain C region;Ig gamma-3 chain C region	>sp|P01859|IGHG2_HUMAN Ig gamma-2 chain C region OS=Homo sapiens GN=IGHG2 PE=1 SV=2;>sp|P01861|IGHG4_HUMAN Ig gamma-4 chain C region OS=Homo sapiens GN=IGHG4 PE=1 SV=1;>sp|P01860|IGHG3_HUMAN Ig gamma-3 chain C region OS=Homo sapiens GN=IGHG3 PE=1 SV=2	35.9	4.6788e-10	3		0.419985	-0.376767	0.60015	0.22174	4.9	2	1	0.046713	180.23	2	52114000	51926000	187880	4.9	2	1	0.009949	23.197	2	65380000	65249000	130280	9.2	3	2	159.398	282.31	2	24665000	24610000	54822	8	3	1			0	21043000	21043000	0
	184	Q7Z406;Q7Z406-6;F2Z2U8;Q7Z406-2;G8JLL9;Q7Z406-5;Q7Z406-4;M0QY43	MYH14	Myosin-14	>sp|Q7Z406|MYH14_HUMAN Myosin-14 OS=Homo sapiens GN=MYH14 PE=1 SV=2;>sp|Q7Z406-6|MYH14_HUMAN Isoform 6 of Myosin-14 OS=Homo sapiens GN=MYH14;>tr|F2Z2U8|F2Z2U8_HUMAN Myosin-14 OS=Homo sapiens GN=MYH14 PE=1 SV=1;>sp|Q7Z406-2|MYH14_HUMAN Isoform 2 of Myosin-1	227.87	6.9879e-97	8		0.904916	-0.0433915	0.603654	0.219212	4.7	9	1	0.6851	16.903	2	7012900	4053500	2959500	4.3	9	2	2.5016	13.765	2	7536300	3233500	4302800	4.3	9	1	0.603318	2.9126	2	3656300	1340300	2316000	4.3	9	1	0.648508	13.731	2	6793400	2337800	4455600
	493	P25311;C9JEV0;H7BZJ8	AZGP1	Zinc-alpha-2-glycoprotein	>sp|P25311|ZA2G_HUMAN Zinc-alpha-2-glycoprotein OS=Homo sapiens GN=AZGP1 PE=1 SV=2;>tr|C9JEV0|C9JEV0_HUMAN Zinc-alpha-2-glycoprotein OS=Homo sapiens GN=AZGP1 PE=3 SV=1	34.258	1.8414e-33	3		0.719274	-0.143105	0.604626	0.218513	21.8	5	5	0.17508	30.217	2	1180400	1119700	60699	3.4	1	1	0.32687	32.215	4	1856600	1668800	187790	19.8	3	3			0	715690	715690	0	34.2	8	8	6.50237	70.196	7	7056700	6642900	413830
	351	O75629	CREG1	Protein CREG1	>sp|O75629|CREG1_HUMAN Protein CREG1 OS=Homo sapiens GN=CREG1 PE=1 SV=1	24.074	0.00011441	1		0.780834	-0.107441	0.609672	0.214904	9.5	1	1	0.39351	NaN	1	520570	428720	91857	9.5	1	1	0.31782	NaN	1	493560	357240	136330	0	0	0			0	0	0	0	9.5	1	1	3.80662	NaN	1	319170	229350	89823
	78	C9J6B6;C9J2Z7;C9K073;C9JF13;Q04637-6;Q04637-7;Q04637-5;E7EX73;Q04637-4;E9PGM1;Q04637-3;E7EUU4;Q04637;Q04637-8;Q04637-9	EIF4G1	Eukaryotic translation initiation factor 4 gamma 1	>tr|C9J6B6|C9J6B6_HUMAN Eukaryotic translation initiation factor 4 gamma 1 (Fragment) OS=Homo sapiens GN=EIF4G1 PE=1 SV=1;>tr|C9J2Z7|C9J2Z7_HUMAN Eukaryotic translation initiation factor 4 gamma 1 (Fragment) OS=Homo sapiens GN=EIF4G1 PE=1 SV=2;>tr|C9K073|C	82.494	0.00049702	15		0.88089	-0.0550785	0.615401	0.210842	1.5	1	1	1.2185	NaN	1	189820	99850	89974	0	0	0			0	0	0	0	1.5	1	1	0.636821	NaN	1	116990	36777	80209	0	0	0			0	0	0	0
	558	P49368;B4DUR8;P49368-2;Q5SZX6;E9PRC8;E9PQ35;Q5SZX9;E9PM09;Q5SZW8	CCT3	T-complex protein 1 subunit gamma	>sp|P49368|TCPG_HUMAN T-complex protein 1 subunit gamma OS=Homo sapiens GN=CCT3 PE=1 SV=4;>tr|B4DUR8|B4DUR8_HUMAN T-complex protein 1 subunit gamma OS=Homo sapiens GN=CCT3 PE=1 SV=1;>sp|P49368-2|TCPG_HUMAN Isoform 2 of T-complex protein 1 subunit gamma OS=	60.533	8.2448e-124	9		0.991106	-0.00387994	0.619589	0.207896	39.1	18	18	1.0202	10.179	24	20183000	9923700	10259000	41.5	19	19	1.0132	15.872	23	22928000	11354000	11575000	39.3	17	17	0.977995	21.156	25	12953000	6201400	6751700	41.7	20	20	0.954472	17.755	26	32824000	15894000	16930000
	674	Q12905;X6R6Z1	ILF2	Interleukin enhancer-binding factor 2	>sp|Q12905|ILF2_HUMAN Interleukin enhancer-binding factor 2 OS=Homo sapiens GN=ILF2 PE=1 SV=2	43.062	8.2933e-47	2		0.95802	-0.0186253	0.621712	0.206411	5.1	1	1	0.80665	NaN	1	1115000	588610	526390	11	3	3	0.75405	16.637	3	4349400	2356200	1993200	9.7	3	3	1.12666	61.432	3	2123300	1067400	1055900	10.8	3	3	1.2292	73.378	3	4046300	2381700	1664600
	670	Q08554-2;Q08554	DSC1	Desmocollin-1	>sp|Q08554-2|DSC1_HUMAN Isoform 1B of Desmocollin-1 OS=Homo sapiens GN=DSC1;>sp|Q08554|DSC1_HUMAN Desmocollin-1 OS=Homo sapiens GN=DSC1 PE=1 SV=2	93.834	1.4819e-136	2		0.746474	-0.126985	0.622961	0.205539	7.9	5	5	0.22807	235.89	2	4666700	4536300	130450	5.2	3	3	0.13708	NaN	1	2808100	2791200	16932	10.7	8	8	2.79275	149.73	5	5378400	5086300	292110	14.9	11	11	3.55619	162.45	13	28250000	26550000	1700500
	502	P29508;P29508-2;H0Y5H9;P48594;F8W9L1;C9JZ65	SERPINB3;SERPINB4	Serpin B3;Serpin B4	>sp|P29508|SPB3_HUMAN Serpin B3 OS=Homo sapiens GN=SERPINB3 PE=1 SV=2;>sp|P29508-2|SPB3_HUMAN Isoform 2 of Serpin B3 OS=Homo sapiens GN=SERPINB3;>tr|H0Y5H9|H0Y5H9_HUMAN Serpin B4 (Fragment) OS=Homo sapiens GN=SERPINB4 PE=3 SV=1;>sp|P48594|SPB4_HUMAN Serpin	44.564	1.0034e-35	6		0.465362	-0.332209	0.625952	0.203459	6.2	2	2	0.075959	162.36	2	1539700	1348800	190840	0	0	0			0	0	0	0	2.6	1	1	2.85103	NaN	1	58877	49934	8943.4	19.7	6	6			0	2441900	2441900	0
	353	O75874	IDH1	Isocitrate dehydrogenase [NADP] cytoplasmic	>sp|O75874|IDHC_HUMAN Isocitrate dehydrogenase [NADP] cytoplasmic OS=Homo sapiens GN=IDH1 PE=1 SV=2	46.659	1.0669e-07	1		0.654395	-0.18416	0.62811	0.201964	3.1	1	1	0.090519	210.68	4	700400	681750	18645	3.1	1	1	0.078296	88.415	3	1297800	1273800	23991	3.1	1	1	6.61857	NaN	1	974670	967890	6780.1	3.1	1	1	3.90946	23.455	2	652990	641220	11761
	603	P62241;Q5JR95	RPS8	40S ribosomal protein S8	>sp|P62241|RS8_HUMAN 40S ribosomal protein S8 OS=Homo sapiens GN=RPS8 PE=1 SV=2;>tr|Q5JR95|Q5JR95_HUMAN 40S ribosomal protein S8 OS=Homo sapiens GN=RPS8 PE=1 SV=1	24.205	6.8375e-102	2		0.965281	-0.0153462	0.628397	0.201766	32.7	7	7	0.80184	90.018	7	7846200	4137300	3708900	41.8	7	7	0.80144	44.505	7	6223600	3438100	2785500	37.5	7	7	1.22308	78.06	7	4620200	2430300	2189900	49	10	10	1.10459	71.041	11	16054000	8406500	7647000
	389	P01857	IGHG1	Ig gamma-1 chain C region	>sp|P01857|IGHG1_HUMAN Ig gamma-1 chain C region OS=Homo sapiens GN=IGHG1 PE=1 SV=1	36.105	2.2845e-09	1		0.809359	-0.0918589	0.628882	0.201431	5.8	2	1	0.49805	NaN	1	262130	216460	45672	2.1	1	0			0	0	0	0	10.9	3	2	1.31525	158.16	3	1051000	485850	565120	8.8	3	1			0	819640	819640	0
	709	Q14766;Q14766-4;C9JD84;Q14766-3;E7EV71;Q14766-2;Q14766-5;H7C2H7;E7EUU6	LTBP1	Latent-transforming growth factor beta-binding protein 1	>sp|Q14766|LTBP1_HUMAN Latent-transforming growth factor beta-binding protein 1 OS=Homo sapiens GN=LTBP1 PE=1 SV=4;>sp|Q14766-4|LTBP1_HUMAN Isoform 4 of Latent-transforming growth factor beta-binding protein 1 OS=Homo sapiens GN=LTBP1;>tr|C9JD84|C9JD84_HUM	186.79	1.3571e-51	9		0.965073	-0.0154397	0.631034	0.199947	6	8	8	0.91888	45.933	13	4899200	2656700	2242500	3	4	4	0.73026	43.867	4	1293900	701560	592360	4.5	7	7	1.20982	75.617	11	4944700	1918300	3026400	4.7	7	7	1.06852	24.889	8	4678000	2589600	2088400
	516	P31946-2;P31946;Q4VY20;Q4VY19	YWHAB	14-3-3 protein beta/alpha;14-3-3 protein beta/alpha, N-terminally processed	>sp|P31946-2|1433B_HUMAN Isoform Short of 14-3-3 protein beta/alpha OS=Homo sapiens GN=YWHAB;>sp|P31946|1433B_HUMAN 14-3-3 protein beta/alpha OS=Homo sapiens GN=YWHAB PE=1 SV=3	27.85	2.2448e-26	4		0.92017	-0.036132	0.633479	0.198268	13.1	3	1	0.60314	NaN	1	225010	148530	76486	9.8	2	1	0.77361	NaN	1	245690	135990	109700	18	4	2	1.65788	46.272	4	3051800	2264200	787670	17.6	4	2	0.926784	14.929	2	671450	294460	376990
	143	E7EMN3;Q13867;K7ESE8;J3KSD8;K7ES02;K7EMJ3	BLMH	Bleomycin hydrolase	>tr|E7EMN3|E7EMN3_HUMAN Bleomycin hydrolase OS=Homo sapiens GN=BLMH PE=1 SV=1;>sp|Q13867|BLMH_HUMAN Bleomycin hydrolase OS=Homo sapiens GN=BLMH PE=1 SV=1;>tr|K7ESE8|K7ESE8_HUMAN Bleomycin hydrolase (Fragment) OS=Homo sapiens GN=BLMH PE=1 SV=1;>tr|J3KSD8|J3	42.52	5.7763e-16	6		0.483781	-0.315351	0.637197	0.195726	3	1	1			0	881480	881480	0	12.2	3	3	0.10037	19.08	2	1570100	1495600	74456	6	2	2			0	169370	169370	0	12.5	3	3	2.33182	30.757	3	1622500	1335000	287590
	349	O75569;O75569-3;O75569-2;G5E9Q4;F8WEG8;C9JMM3;B4DJC7	PRKRA	Interferon-inducible double stranded RNA-dependent protein kinase activator A	>sp|O75569|PRKRA_HUMAN Interferon-inducible double-stranded RNA-dependent protein kinase activator A OS=Homo sapiens GN=PRKRA PE=1 SV=1;>sp|O75569-3|PRKRA_HUMAN Isoform 3 of Interferon-inducible double-stranded RNA-dependent protein kinase activator A OS=H	34.404	2.2194e-22	7		0.946883	-0.0237035	0.637218	0.195712	4.2	1	1	0.66516	NaN	1	418040	247910	170140	14.1	3	3	1.0118	25.234	4	1039100	552760	486320	16.9	4	4	0.950119	58.811	5	1858600	886320	972290	20.1	5	5	1.25715	52.384	5	2017000	1180600	836430
	207	F8VYE8;P36873;P36873-2;E9PMD7;F8VR82;P62140;P62136;F8W0W8;P62136-2;F8WE71;C9J9S3;C9JP48;F5H1L6;E7ETD8;F5H037;P62136-3	PPP1CC;PPP1CA;PPP1CB	Serine/threonine-protein phosphatase;Serine/threonine-protein phosphatase PP1-gamma catalytic subunit;Serine/threonine-protein phosphatase PP1-beta catalytic subunit;Serine/threonine-protein phosphatase PP1-alpha catalytic subunit	>tr|F8VYE8|F8VYE8_HUMAN Serine/threonine-protein phosphatase OS=Homo sapiens GN=PPP1CC PE=1 SV=1;>sp|P36873|PP1G_HUMAN Serine/threonine-protein phosphatase PP1-gamma catalytic subunit OS=Homo sapiens GN=PPP1CC PE=1 SV=1;>sp|P36873-2|PP1G_HUMAN Isoform Gamm	34.95	2.2486e-06	16		0.890973	-0.0501353	0.647584	0.188704	4.6	1	1	0.70521	NaN	1	177240	110660	66582	0	0	0			0	0	0	0	0	0	0			0	0	0	0	10.2	2	2	1.12567	NaN	1	225560	75126	150440
	422	V9GYZ6;P07814	EPRS	Bifunctional glutamate/proline--tRNA ligase;Glutamate--tRNA ligase;Proline--tRNA ligase	>tr|V9GYZ6|V9GYZ6_HUMAN Bifunctional glutamate/proline--tRNA ligase (Fragment) OS=Homo sapiens GN=EPRS PE=1 SV=1;>sp|P07814|SYEP_HUMAN Bifunctional glutamate/proline--tRNA ligase OS=Homo sapiens GN=EPRS PE=1 SV=5	109.04	1.2157e-10	2		0.959763	-0.0178361	0.647584	0.188704	1.4	1	1	0.88008	23.86	2	343320	178490	164830	0	0	0			0	0	0	0	1.4	1	1			0	0	0	0	0.9	1	1	1.04666	NaN	1	521030	262750	258280
	712	Q15084-3;Q15084;Q15084-4;Q15084-5;Q15084-2	PDIA6	Protein disulfide-isomerase A6	>sp|Q15084-3|PDIA6_HUMAN Isoform 3 of Protein disulfide-isomerase A6 OS=Homo sapiens GN=PDIA6;>sp|Q15084|PDIA6_HUMAN Protein disulfide-isomerase A6 OS=Homo sapiens GN=PDIA6 PE=1 SV=1;>sp|Q15084-4|PDIA6_HUMAN Isoform 4 of Protein disulfide-isomerase A6 OS=H	47.837	9.8632e-26	5		0.969735	-0.0133471	0.64776	0.188586	6.2	2	2	1.0547	28.837	2	3154400	1450400	1704000	5.7	2	2	0.7656	4.5837	3	1837100	1004300	832870	8.7	3	3	1.09011	21.488	3	2090100	977300	1112800	11	4	4	1.00464	37.922	3	3627200	1750600	1876700
	50	B4DT72;O43242	PSMD3	26S proteasome non-ATPase regulatory subunit 3	>tr|B4DT72|B4DT72_HUMAN 26S proteasome non-ATPase regulatory subunit 3 OS=Homo sapiens GN=PSMD3 PE=1 SV=1;>sp|O43242|PSMD3_HUMAN 26S proteasome non-ATPase regulatory subunit 3 OS=Homo sapiens GN=PSMD3 PE=1 SV=2	41.183	6.0128e-05	2		0.834303	-0.0786763	0.661956	0.179171	4.2	1	1	0.45112	NaN	1	110940	78142	32794	0	0	0			0	0	0	0	3.1	1	1	1.65418	NaN	1	103930	47418	56512	2.5	1	1	0.77821	NaN	1	235750	100480	135270
	282	K7EM56;P62841;K7ELC2;K7EQJ5;S4R456;K7EJ78	RPS15	40S ribosomal protein S15	>tr|K7EM56|K7EM56_HUMAN 40S ribosomal protein S15 OS=Homo sapiens GN=RPS15 PE=1 SV=2;>sp|P62841|RS15_HUMAN 40S ribosomal protein S15 OS=Homo sapiens GN=RPS15 PE=1 SV=2;>tr|K7ELC2|K7ELC2_HUMAN 40S ribosomal protein S15 OS=Homo sapiens GN=RPS15 PE=1 SV=1;>tr	12.99	5.7524e-35	6		0.946958	-0.0236694	0.669413	0.174306	10.7	1	1	0.71343	NaN	1	262060	160300	101760	10.7	1	1	0.94545	NaN	1	359470	204080	155390	22.3	2	2	1.02454	7.3692	2	334700	166960	167750	41.1	2	2	1.1636	33.113	7	4430000	2067400	2362500
	672	Q09666	AHNAK	Neuroblast differentiation-associated protein AHNAK	>sp|Q09666|AHNK_HUMAN Neuroblast differentiation-associated protein AHNAK OS=Homo sapiens GN=AHNAK PE=1 SV=2	629.09	4.4292e-20	1		0.818311	-0.0870814	0.674312	0.171139	2.7	5	5	0.39312	28.348	5	2818000	2115200	702730	0	0	0			0	0	0	0	1.4	2	2	1.33583	108.05	2	438400	280130	158270	4	2	2	1.04347	5.3194	2	777010	387850	389150
	478	P21796;C9JI87	VDAC1	Voltage-dependent anion-selective channel protein 1	>sp|P21796|VDAC1_HUMAN Voltage-dependent anion-selective channel protein 1 OS=Homo sapiens GN=VDAC1 PE=1 SV=2;>tr|C9JI87|C9JI87_HUMAN Voltage-dependent anion-selective channel protein 1 (Fragment) OS=Homo sapiens GN=VDAC1 PE=1 SV=1	30.772	0	2		0.959729	-0.0178515	0.6824	0.165961	66.4	15	15	0.83785	85.992	38	96899000	50253000	46646000	65.7	14	14	0.84253	89.49	41	139720000	73609000	66108000	66.4	15	15	1.09934	83.174	41	87771000	45084000	42687000	66.4	15	15	1.09323	88.655	46	132190000	67370000	64815000
	535	P40227;B4DPJ8;P40227-2;Q92526;Q92526-2;Q92526-3;J3KRI6	CCT6A	T-complex protein 1 subunit zeta	>sp|P40227|TCPZ_HUMAN T-complex protein 1 subunit zeta OS=Homo sapiens GN=CCT6A PE=1 SV=3;>tr|B4DPJ8|B4DPJ8_HUMAN T-complex protein 1 subunit zeta OS=Homo sapiens GN=CCT6A PE=1 SV=1;>sp|P40227-2|TCPZ_HUMAN Isoform 2 of T-complex protein 1 subunit zeta OS=H	58.024	2.4899e-198	7		0.98648	-0.00591159	0.688082	0.16236	36.2	16	16	1.0419	19.773	20	25421000	12421000	13000000	40.5	19	19	1.0279	20.879	22	30753000	14852000	15901000	39	16	16	0.965251	9.2355	17	15852000	7741800	8110200	39	16	16	0.916086	14.529	19	37094000	17786000	19308000
	151	E7EQL5;Q13409-6;Q13409-3;Q13409-7;Q13409-2;Q13409-5;Q13409;F8W8S0;E9PGG1;E7EUM4;E7ERR6;E7ERH4;E7ET01;E7ETL8;E7EQU2;E7ESD3;E7EMU4;E7EV09;E7EU01	DYNC1I2	Cytoplasmic dynein 1 intermediate chain 2	>tr|E7EQL5|E7EQL5_HUMAN Cytoplasmic dynein 1 intermediate chain 2 (Fragment) OS=Homo sapiens GN=DYNC1I2 PE=1 SV=1;>sp|Q13409-6|DC1I2_HUMAN Isoform 2F of Cytoplasmic dynein 1 intermediate chain 2 OS=Homo sapiens GN=DYNC1I2;>sp|Q13409-3|DC1I2_HUMAN Isoform 2	34.913	5.3836e-16	19		0.896511	-0.0474442	0.692751	0.159423	0	0	0			0	0	0	0	11.5	2	2	0.77303	NaN	1	544350	281880	262470	0	0	0			0	0	0	0	4.6	1	1	1.03972	NaN	1	529250	266030	263220
	594	P60903	S100A10	Protein S100-A10	>sp|P60903|S10AA_HUMAN Protein S100-A10 OS=Homo sapiens GN=S100A10 PE=1 SV=2	11.203	0.00033996	1		0.95826	-0.0185167	0.694492	0.158333	10.3	1	1	1.1451	NaN	1	875740	390470	485270	10.3	1	1	0.94162	5.3513	2	1738300	870060	868210	10.3	1	1	0.803988	NaN	1	890030	369410	520620	10.3	1	1	0.972668	13.677	2	2032200	1071400	960860
	567	P50990;P50990-2;P50990-3;H7C4C8;H7C2U0	CCT8	T-complex protein 1 subunit theta	>sp|P50990|TCPQ_HUMAN T-complex protein 1 subunit theta OS=Homo sapiens GN=CCT8 PE=1 SV=4;>sp|P50990-2|TCPQ_HUMAN Isoform 2 of T-complex protein 1 subunit theta OS=Homo sapiens GN=CCT8;>sp|P50990-3|TCPQ_HUMAN Isoform 3 of T-complex protein 1 subunit theta	59.62	8.4907e-212	5		0.995322	-0.00203624	0.697909	0.156201	58.8	27	27	1.0286	39.806	30	48229000	19482000	28747000	42.5	19	19	1.0096	14.151	20	21863000	9309400	12553000	45.8	21	21	0.943396	18.125	24	14784000	6846300	7937800	49.8	24	24	1.00176	27.31	27	49834000	26069000	23765000
	857	Q92616	GCN1L1	Translational activator GCN1	>sp|Q92616|GCN1L_HUMAN Translational activator GCN1 OS=Homo sapiens GN=GCN1L1 PE=1 SV=6	292.75	3.3559e-09	1		0.827279	-0.0823479	0.700151	0.154808	1.7	3	3	0.64523	36.173	2	363950	257730	106220	0	0	0			0	0	0	0	0.9	2	2	1.06069	NaN	1	151790	88284	63510	0	0	0			0	0	0	0
	803	Q8NBS9-2;Q86UY0;Q8NBS9	TXNDC5	Thioredoxin domain-containing protein 5	>sp|Q8NBS9-2|TXND5_HUMAN Isoform 2 of Thioredoxin domain-containing protein 5 OS=Homo sapiens GN=TXNDC5;>tr|Q86UY0|Q86UY0_HUMAN TXNDC5 protein OS=Homo sapiens GN=TXNDC5 PE=1 SV=1;>sp|Q8NBS9|TXND5_HUMAN Thioredoxin domain-containing protein 5 OS=Homo sapien	36.177	3.2536e-17	3		0.973534	-0.011649	0.700242	0.154752	2.8	1	1	0.91361	NaN	1	654020	312720	341300	15.1	4	4	0.91366	21.53	3	1925900	1031700	894190	4.6	1	1	1.12841	NaN	1	207610	97900	109710	9.6	2	2	0.953652	10.287	2	991950	482240	509710
	725	Q16610-2;Q16610;Q16610-4;Q16610-3	ECM1	Extracellular matrix protein 1	>sp|Q16610-2|ECM1_HUMAN Isoform 2 of Extracellular matrix protein 1 OS=Homo sapiens GN=ECM1;>sp|Q16610|ECM1_HUMAN Extracellular matrix protein 1 OS=Homo sapiens GN=ECM1 PE=1 SV=2;>sp|Q16610-4|ECM1_HUMAN Isoform 4 of Extracellular matrix protein 1 OS=Homo s	46.099	2.1526e-06	4		0.548517	-0.26081	0.700906	0.15434	5.5	2	2	0.55035	NaN	1	1482100	1030700	451410	3.4	1	1	0.10051	NaN	1	685120	652960	32164	0	0	0			0	0	0	0	3.4	1	1	2.98347	NaN	1	1261900	1224700	37152
	196	H0YFV1;F5H623;Q9HA77	CARS2	Probable cysteine--tRNA ligase, mitochondrial	>tr|H0YFV1|H0YFV1_HUMAN Probable cysteine--tRNA ligase, mitochondrial (Fragment) OS=Homo sapiens GN=CARS2 PE=1 SV=1;>tr|F5H623|F5H623_HUMAN Probable cysteine--tRNA ligase, mitochondrial OS=Homo sapiens GN=CARS2 PE=1 SV=1;>sp|Q9HA77|SYCM_HUMAN Probable cyst	12.832	0.00037401	3		0.812111	-0.0903847	0.704833	0.151914	10.9	1	1	0.62067	NaN	1	317050	162320	154740	10.9	1	1	1.0626	NaN	1	270410	113310	157110	0	0	0			0	0	0	0	0	0	0			0	0	0	0
	317	O43143	DHX15	Putative pre-mRNA-splicing factor ATP-dependent RNA helicase DHX15	>sp|O43143|DHX15_HUMAN Putative pre-mRNA-splicing factor ATP-dependent RNA helicase DHX15 OS=Homo sapiens GN=DHX15 PE=1 SV=2	90.932	3.1742e-05	1		0.866709	-0.0621268	0.704833	0.151914	3.3	2	2	0.71684	34.221	2	240380	118000	122380	0	0	0			0	0	0	0	1.5	1	1	1.04791	NaN	1	82872	43697	39175	0	0	0			0	0	0	0
	565	P50402;Q5HY57	EMD	Emerin	>sp|P50402|EMD_HUMAN Emerin OS=Homo sapiens GN=EMD PE=1 SV=1;>tr|Q5HY57|Q5HY57_HUMAN Emerin OS=Homo sapiens GN=EMD PE=1 SV=1	28.994	7.9291e-26	2		0.911533	-0.0402277	0.71827	0.143712	15.4	3	3	0.69115	29.589	5	2472800	1340700	1132100	3.9	1	1	0.7439	41.47	4	1434900	758400	676450	8.7	2	2	1.09499	58.352	8	2550400	1364400	1186000	29.9	6	6	1.22629	79.907	10	6181800	3463500	2718300
	715	Q15366-3;Q15366-4;Q15366-2;Q15366-7;F8VZX2;Q15366-5;B4DLC0;B4DXP5;F8VXH9;F8VRH0;F8W0G4;H3BSS4;P57721-5;E9PFP8;P57721-4;P57721;F8W1G6;J3QT27;P57721-2;P57721-3;F8VTZ0;H3BND9	PCBP2		>sp|Q15366-3|PCBP2_HUMAN Isoform 3 of Poly(rC)-binding protein 2 OS=Homo sapiens GN=PCBP2;>sp|Q15366-4|PCBP2_HUMAN Isoform 4 of Poly(rC)-binding protein 2 OS=Homo sapiens GN=PCBP2;>sp|Q15366-2|PCBP2_HUMAN Isoform 2 of Poly(rC)-binding protein 2 OS=Homo sap	38.221	8.6115e-255	22		0.89496	-0.0481962	0.718274	0.14371	40.9	9	1	1.0183	NaN	1	229580	145590	83991	44.8	10	1	0.78656	NaN	1	1126000	559050	566970	36.5	9	0			0	0	0	0	35.1	9	0			0	0	0	0
	46	P61619;B4DR61;P61619-3;H7C1Q9;C9JXC6;H7C069;A6NK38;F2Z2C7;A6NIF9;C9JJV4;F8W776;Q8TC24;Q9H9S3-2;Q9H9S3-3;Q9H9S3	SEC61A1	Protein transport protein Sec61 subunit alpha isoform 1	>sp|P61619|S61A1_HUMAN Protein transport protein Sec61 subunit alpha isoform 1 OS=Homo sapiens GN=SEC61A1 PE=1 SV=2;>tr|B4DR61|B4DR61_HUMAN Protein transport protein Sec61 subunit alpha isoform 1 OS=Homo sapiens GN=SEC61A1 PE=1 SV=1;>sp|P61619-3|S61A1_HUMA	52.264	7.3632e-60	15		0.92007	-0.0361794	0.718704	0.14345	9	3	3	0.79816	93.473	3	1593000	921390	671640	9	3	3	0.70608	88.179	3	2229900	1363500	866340	3.8	2	2	1.18899	13.613	2	982580	514900	467680	4.2	2	2	1.06945	12.389	2	1493000	749700	743350
	212	F8W914;Q9NQC3-2;Q9NQC3-5;Q9NQC3;Q9NQC3-3;H7C106;Q9NQC3-4;F8WAM4;Q9NQC3-6	RTN4	Reticulon-4	>tr|F8W914|F8W914_HUMAN Reticulon OS=Homo sapiens GN=RTN4 PE=1 SV=1;>sp|Q9NQC3-2|RTN4_HUMAN Isoform 2 of Reticulon-4 OS=Homo sapiens GN=RTN4;>sp|Q9NQC3-5|RTN4_HUMAN Isoform 5 of Reticulon-4 OS=Homo sapiens GN=RTN4;>sp|Q9NQC3|RTN4_HUMAN Reticulon-4 OS=Homo	37.144	1.1159e-18	9		0.879898	-0.0555674	0.725914	0.139115	4.1	1	1	0.80365	NaN	1	713020	388880	324130	15.9	4	4	0.68934	35.859	4	2102500	1171900	930680	0	0	0			0	0	0	0	3.8	1	1	1.22969	NaN	1	1319800	765710	554060
	356	O94826	TOMM70A	Mitochondrial import receptor subunit TOM70	>sp|O94826|TOM70_HUMAN Mitochondrial import receptor subunit TOM70 OS=Homo sapiens GN=TOMM70A PE=1 SV=1	67.454	4.0238e-06	1		0.842628	-0.0743639	0.730131	0.136599	4.4	2	2	1.035	38.324	2	429970	233150	196820	0	0	0			0	0	0	0	0	0	0			0	0	0	0	3.8	2	2	0.686012	45.532	2	1851000	766680	1084300
	19	P43243;A8MXP9;D6REM6;D6R991;B3KM87;P43243-2;H0Y8T4;D6R8Z5;D6RBK5;D6RB45;D6RGW7;D6R9F3;D6RBS2;D6RCM3;D6REK4;D6RBI2;D6RE02;D6RIA2;D6RAM9;D6RAY2	MATR3	Matrin-3	>sp|P43243|MATR3_HUMAN Matrin-3 OS=Homo sapiens GN=MATR3 PE=1 SV=2;>tr|A8MXP9|A8MXP9_HUMAN Matrin-3 OS=Homo sapiens GN=MATR3 PE=1 SV=1;>tr|D6REM6|D6REM6_HUMAN Matrin-3 OS=Homo sapiens GN=MATR3 PE=1 SV=1;>tr|D6R991|D6R991_HUMAN Matrin-3 (Fragment) OS=Homo s	94.622	1.0581e-173	20		0.934589	-0.0293794	0.733069	0.134855	26.2	15	15	0.80455	29.184	35	14706000	8272800	6432900	29.3	17	17	0.78595	30.004	19	16797000	9236300	7561000	26.1	16	16	1.11913	29.953	41	14467000	7535400	6931400	28.5	18	18	1.07809	47.579	45	31587000	14958000	16629000
	59	B4E241;P84103	SRSF3	Serine/arginine-rich splicing factor 3	>tr|B4E241|B4E241_HUMAN Serine/arginine-rich-splicing factor 3 OS=Homo sapiens GN=SFRS3 PE=1 SV=1;>sp|P84103|SRSF3_HUMAN Serine/arginine-rich splicing factor 3 OS=Homo sapiens GN=SRSF3 PE=1 SV=1	14.203	1.4535e-16	2		0.905302	-0.0432064	0.740882	0.130251	24.2	3	2	0.70693	176.96	3	3993400	2379600	1613700	33.1	4	3	0.74154	26.38	4	10353000	5903600	4449300	36.3	4	3	1.21951	122.88	6	6188900	3022800	3166100	16.1	2	2	1.0507	38.684	3	2089100	1030000	1059100
	702	Q14204;H0YJ21	DYNC1H1	Cytoplasmic dynein 1 heavy chain 1	>sp|Q14204|DYHC1_HUMAN Cytoplasmic dynein 1 heavy chain 1 OS=Homo sapiens GN=DYNC1H1 PE=1 SV=5	532.4	0	2		0.948576	-0.0229277	0.741952	0.129624	17.4	64	64	0.83004	24.63	66	45514000	24091000	21423000	4.6	16	16	0.8555	23.879	16	8336400	4485300	3851100	8.5	33	33	1.05122	24.466	32	11595000	5843000	5752100	15.1	57	57	1.08462	23.135	58	50450000	25545000	24905000
	210	P09651-3;F8W6I7;P09651-2;P09651;F8VTQ5;F8W646;F8VZ49;Q32P51;H0YH80;F8VYN5	HNRNPA1	Heterogeneous nuclear ribonucleoprotein A1	>sp|P09651-3|ROA1_HUMAN Isoform 2 of Heterogeneous nuclear ribonucleoprotein A1 OS=Homo sapiens GN=HNRNPA1;>tr|F8W6I7|F8W6I7_HUMAN Heterogeneous nuclear ribonucleoprotein A1 OS=Homo sapiens GN=HNRNPA1 PE=1 SV=2;>sp|P09651-2|ROA1_HUMAN Isoform A1-A of Heter	29.386	5.3264e-74	10		0.905667	-0.0430314	0.744283	0.128262	11.6	2	2	0.76051	33.239	2	614710	342880	271820	26.6	6	6	0.69283	64.135	7	1940800	1194000	746750	19.5	4	4	1.17126	20.128	5	924830	491560	433270	19.5	4	4	1.09016	42.164	5	1444500	761570	682910
	239	J3KRL2;H3BPV7;Q15046;Q15046-2	KARS	Lysine--tRNA ligase	>tr|J3KRL2|J3KRL2_HUMAN Lysine--tRNA ligase (Fragment) OS=Homo sapiens GN=KARS PE=1 SV=1;>tr|H3BPV7|H3BPV7_HUMAN Lysine--tRNA ligase (Fragment) OS=Homo sapiens GN=KARS PE=1 SV=1;>sp|Q15046|SYK_HUMAN Lysine--tRNA ligase OS=Homo sapiens GN=KARS PE=1 SV=3;>sp	12.103	0.0015267	4		0.904391	-0.043644	0.75	0.124939	10.8	1	1			0	0	0	0	10.8	1	1	0.81672	NaN	1	329930	193330	136600	10.8	1	1	1.00147	NaN	1	62976	28661	34315	0	0	0			0	0	0	0
	132	D6RFI1;D6R9W4;Q16643;Q16643-3	DBN1	Drebrin	>tr|D6RFI1|D6RFI1_HUMAN Drebrin (Fragment) OS=Homo sapiens GN=DBN1 PE=1 SV=1;>tr|D6R9W4|D6R9W4_HUMAN Drebrin (Fragment) OS=Homo sapiens GN=DBN1 PE=1 SV=1;>sp|Q16643|DREB_HUMAN Drebrin OS=Homo sapiens GN=DBN1 PE=1 SV=4;>sp|Q16643-3|DREB_HUMAN Isoform 3 of D	13.437	8.3753e-06	4		0.803605	-0.0949573	0.75	0.124939	7.3	1	1	1.0049	NaN	1	458970	274660	184310	0	0	0			0	0	0	0	9.7	1	1	0.642632	NaN	1	89142	35886	53256	0	0	0			0	0	0	0
	531	P38159;H0Y6E7;H3BT71;P38159-2;Q96E39;B3KRG5;H3BUY5;H3BR27;P38159-3;H3BNC1;O75526;Q8N7X1	RBMX;RBMXL1	RNA-binding motif protein, X chromosome;RNA-binding motif protein, X chromosome, N-terminally processed;RNA binding motif protein, X-linked-like-1	>sp|P38159|RBMX_HUMAN RNA-binding motif protein, X chromosome OS=Homo sapiens GN=RBMX PE=1 SV=3;>tr|H0Y6E7|H0Y6E7_HUMAN RNA-binding motif protein, X chromosome, N-terminally processed (Fragment) OS=Homo sapiens GN=RBMX PE=1 SV=2;>tr|H3BT71|H3BT71_HUMAN RNA	42.331	9.0243e-55	12		0.887265	-0.0519467	0.7501	0.124881	10.5	3	3	0.70093	87.077	3	3069900	1605700	1464100	16.6	5	5	0.65129	47.321	5	5763600	3097100	2666500	16.4	5	5	1.13466	75.054	5	4945800	2637400	2308400	19.9	6	6	1.19646	89.857	6	9049400	4873900	4175500
	320	O43390;B4DT28;O43390-4;O43390-3;O43390-2;E7ETM7	HNRNPR;HNRPR	Heterogeneous nuclear ribonucleoprotein R	>sp|O43390|HNRPR_HUMAN Heterogeneous nuclear ribonucleoprotein R OS=Homo sapiens GN=HNRNPR PE=1 SV=1;>tr|B4DT28|B4DT28_HUMAN Heterogeneous nuclear ribonucleoprotein R OS=Homo sapiens GN=HNRNPR PE=1 SV=1;>sp|O43390-4|HNRPR_HUMAN Isoform 4 of Heterogeneous n	70.942	3.9549e-63	6		0.932681	-0.0302668	0.751789	0.123904	18.2	11	9	0.80097	26.581	9	5310400	2833500	2476900	12.2	7	4	0.78034	71.11	7	4704700	2604000	2100600	20.2	11	7	1.07094	30.061	10	4966400	2428200	2538200	24.5	13	10	1.13049	36.045	12	17226000	9038800	8187500
	27	B1ANR0;Q13310-2;Q13310;Q13310-3;H0Y5F5;H0YEU6;H0YCC8;H0YEQ8;B1ANR1;H0Y6X6;H0YER0	PABPC4	Polyadenylate-binding protein 4	>tr|B1ANR0|B1ANR0_HUMAN Poly(A) binding protein, cytoplasmic 4 (Inducible form), isoform CRA_e OS=Homo sapiens GN=PABPC4 PE=1 SV=1;>sp|Q13310-2|PABP4_HUMAN Isoform 2 of Polyadenylate-binding protein 4 OS=Homo sapiens GN=PABPC4;>sp|Q13310|PABP4_HUMAN Polyad	67.97	4.0223e-226	11		0.965213	-0.0153766	0.752487	0.123501	30.9	16	9	0.92754	29.121	13	10110000	4229600	5880200	36.3	23	11	0.87998	27.217	16	35009000	18122000	16887000	37.7	21	8	1.06976	30.504	15	12600000	6086200	6513500	33.5	18	9	0.994036	48.805	13	21137000	10613000	10524000
	194	Q13561;Q13561-3;Q13561-2;F5H2S7;F8W1I6;F5H223;F8W0U6;H0YHL1;F8VRV7;H0YI98;F8VW18	DCTN2	Dynactin subunit 2	>sp|Q13561|DCTN2_HUMAN Dynactin subunit 2 OS=Homo sapiens GN=DCTN2 PE=1 SV=4;>sp|Q13561-3|DCTN2_HUMAN Isoform 3 of Dynactin subunit 2 OS=Homo sapiens GN=DCTN2;>sp|Q13561-2|DCTN2_HUMAN Isoform 2 of Dynactin subunit 2 OS=Homo sapiens GN=DCTN2;>tr|F5H2S7|F5H2	44.23	2.4568e-10	11		0.894274	-0.0485296	0.753479	0.122929	6.2	2	2	0.90926	23.353	2	1749500	939320	810190	2.5	1	1	0.7694	NaN	1	805390	437630	367760	3.7	1	1	0.697837	NaN	1	419000	164750	254250	6	2	2	1.31005	11.381	2	1980800	1134800	845920
	634	P81605;P81605-2	DCD	Dermcidin;Survival-promoting peptide;DCD-1	>sp|P81605|DCD_HUMAN Dermcidin OS=Homo sapiens GN=DCD PE=1 SV=2;>sp|P81605-2|DCD_HUMAN Isoform 2 of Dermcidin OS=Homo sapiens GN=DCD	11.284	7.6535e-16	2		0.700536	-0.15457	0.754234	0.122494	22.7	3	3	0.2488	184.52	7	6386100	4601800	1784200	22.7	3	3	0.44722	162.31	3	6000800	4009100	1991700	22.7	2	2	1.10396	NaN	1	2622900	2371200	251710	22.7	3	3	1.96063	41.947	4	6757000	5254600	1502400
	242	Q8WWM7-6;Q8WWM7-8;Q8WWM7-5;Q8WWM7-4;Q8WWM7-9;Q8WWM7-2;H3BUF6;Q8WWM7;Q8WWM7-3;H3BSK9;Q8WWM7-7	ATXN2L	Ataxin-2-like protein	>sp|Q8WWM7-6|ATX2L_HUMAN Isoform 6 of Ataxin-2-like protein OS=Homo sapiens GN=ATXN2L;>sp|Q8WWM7-8|ATX2L_HUMAN Isoform 8 of Ataxin-2-like protein OS=Homo sapiens GN=ATXN2L;>sp|Q8WWM7-5|ATX2L_HUMAN Isoform 5 of Ataxin-2-like protein OS=Homo sapiens GN=ATXN2	102.89	1.3234e-16	11		0.900709	-0.0454155	0.75541	0.121817	4.2	3	3	0.84227	23.073	4	1132400	597410	535000	5.4	3	3	0.65478	23.49	5	447110	268190	178920	2.7	2	2	1.02606	12.002	3	540860	255870	284990	7.2	5	5	1.1631	44.618	6	2102600	1082000	1020600
	854	Q92522	H1FX	Histone H1x	>sp|Q92522|H1X_HUMAN Histone H1x OS=Homo sapiens GN=H1FX PE=1 SV=1	22.487	2.089e-30	1		0.821471	-0.0854077	0.75541	0.121817	17.8	4	4	0.49325	91.813	4	4025400	2525300	1500100	11.7	2	2	0.58384	117.19	2	1443000	952800	490190	17.4	3	3	1.23107	60.649	3	2316600	1210600	1106000	17.4	3	3	1.28447	51.608	3	3750400	2038400	1712000
	1026	Q9Y2W1	THRAP3	Thyroid hormone receptor-associated protein 3	>sp|Q9Y2W1|TR150_HUMAN Thyroid hormone receptor-associated protein 3 OS=Homo sapiens GN=THRAP3 PE=1 SV=2	108.66	1.9925e-28	1		0.812744	-0.0900461	0.765789	0.115891	3.7	3	3	0.46399	121.19	5	5585000	2158600	3426400	8.6	7	7	0.62126	31.426	7	8685000	5258000	3427000	4.3	4	4	1.08706	58.416	7	2561700	1547900	1013800	3.2	3	3	1.39245	27.001	4	2417000	1445700	971260
	590	Q99880;Q99879;Q99877;Q93079;Q5QNW6;P62807;P58876;Q5QNW6-2;U3KQK0;P57053;O60814;Q8N257;Q16778;P33778;P23527;B4DR52;P06899;Q96A08	HIST1H2BL;HIST1H2BM;HIST1H2BN;HIST1H2BH;HIST2H2BF;HIST1H2BC;HIST1H2BD;H2BFS;HIST1H2BK;HIST3H2BB;HIST2H2BE;HIST1H2BB;HIST1H2BO;HIST1H2BJ;HIST1H2BA	Histone H2B type 1-L;Histone H2B type 1-M;Histone H2B type 1-N;Histone H2B type 1-H;Histone H2B type 2-F;Histone H2B type 1-C/E/F/G/I;Histone H2B type 1-D;Histone H2B type F-S;Histone H2B type 1-K;Histone H2B type 3-B;Histone H2B type 2-E;Histone H2B type 1-B;Histone H2B type 1-O;Histone H2B;Histone H2B type 1-J;Histone H2B type 1-A	>sp|Q99880|H2B1L_HUMAN Histone H2B type 1-L OS=Homo sapiens GN=HIST1H2BL PE=1 SV=3;>sp|Q99879|H2B1M_HUMAN Histone H2B type 1-M OS=Homo sapiens GN=HIST1H2BM PE=1 SV=3;>sp|Q99877|H2B1N_HUMAN Histone H2B type 1-N OS=Homo sapiens GN=HIST1H2BN PE=1 SV=3;>sp|Q93	13.952	6.3661e-31	18		0.801107	-0.0963095	0.766973	0.11522	33.3	3	3	0.58786	153.08	2	1327200	920540	406640	35.7	4	4	0.43794	84.074	4	4460400	3068900	1391500	7.1	1	1	1.25902	1.8427	2	2205900	1244800	961120	19	2	2	1.2707	30.168	13	9042300	5042900	3999400
	959	Q9HCE1;Q5JR04;Q9HCE1-2;Q9HCE1-3	MOV10	Putative helicase MOV-10	>sp|Q9HCE1|MOV10_HUMAN Putative helicase MOV-10 OS=Homo sapiens GN=MOV10 PE=1 SV=2;>tr|Q5JR04|Q5JR04_HUMAN Mov10, Moloney leukemia virus 10, homolog (Mouse), isoform CRA_a OS=Homo sapiens GN=MOV10 PE=1 SV=1;>sp|Q9HCE1-2|MOV10_HUMAN Isoform 2 of Putative he	113.67	1.4845e-47	4		0.930181	-0.0314324	0.766973	0.11522	3.4	3	3	0.91894	43.31	3	818080	415250	402830	1.2	1	1	0.72129	NaN	1	179250	102570	76681	9.7	7	7	1.04322	32.042	8	1683100	883850	799200	6.9	6	6	1.08267	13.674	5	2253000	1173000	1080100
	852	Q92499-3;Q92499;Q92499-2	DDX1	ATP-dependent RNA helicase DDX1	>sp|Q92499-3|DDX1_HUMAN Isoform 3 of ATP-dependent RNA helicase DDX1 OS=Homo sapiens GN=DDX1;>sp|Q92499|DDX1_HUMAN ATP-dependent RNA helicase DDX1 OS=Homo sapiens GN=DDX1 PE=1 SV=2;>sp|Q92499-2|DDX1_HUMAN Isoform 2 of ATP-dependent RNA helicase DDX1 OS=Hom	68.712	8.036e-16	3		0.893525	-0.0488933	0.76804	0.114616	3.1	1	1	0.62403	NaN	1	64089	39457	24631	7.8	3	3	0.8407	2.7029	3	576400	292910	283500	8.3	3	3	0.999201	15.7	3	316180	164670	151510	2.9	1	1	1.21598	NaN	1	411190	212180	199000
	420	P07355;P07355-2;H0YN42;H0YMD0;H0YMU9;A6NMY6;H0YKS4;H0YM50;H0YNP5;H0YMM1;H0YN28;H0YL33;H0YKZ7;H0YLV6;H0YMT9;H0YKX9;H0YKL9;H0YMW4;H0YNA0;H0YKV8;H0YN52;H0YMD9;H0YNB8;H0YKN4;H0YLE2	ANXA2;ANXA2P2	Annexin A2;Annexin;Putative annexin A2-like protein	>sp|P07355|ANXA2_HUMAN Annexin A2 OS=Homo sapiens GN=ANXA2 PE=1 SV=2;>sp|P07355-2|ANXA2_HUMAN Isoform 2 of Annexin A2 OS=Homo sapiens GN=ANXA2;>tr|H0YN42|H0YN42_HUMAN Annexin (Fragment) OS=Homo sapiens GN=ANXA2 PE=1 SV=1;>tr|H0YMD0|H0YMD0_HUMAN Annexin (Fr	38.604	0	25		0.876733	-0.0571325	0.768214	0.114518	65.5	23	23	0.73089	96.278	35	54393000	29844000	24549000	59.9	20	20	0.67153	77.725	44	77693000	44686000	33006000	52.2	18	18	0.923191	120.77	30	48762000	23520000	25242000	64	22	22	1.30395	146.46	47	85043000	48598000	36446000
	204	F8VRN8;Q9UHB6;Q9UHB6-4;F8VTU2;F8VVQ7;F8VS07;Q9UHB6-3;F8VQE1;Q9UHB6-2;Q9UHB6-5	LIMA1	LIM domain and actin-binding protein 1	>tr|F8VRN8|F8VRN8_HUMAN LIM domain and actin-binding protein 1 OS=Homo sapiens GN=LIMA1 PE=1 SV=1;>sp|Q9UHB6|LIMA1_HUMAN LIM domain and actin-binding protein 1 OS=Homo sapiens GN=LIMA1 PE=1 SV=1;>sp|Q9UHB6-4|LIMA1_HUMAN Isoform 4 of LIM domain and actin-bi	43.19	1.3026e-07	10		0.81111	-0.0909201	0.768702	0.114242	0	0	0			0	0	0	0	4.4	1	1	0.67165	NaN	1	147110	93064	54048	9.8	3	3	0.979528	15.288	3	748850	365730	383120	0	0	0			0	0	0	0
	162	P23588;E7EX17;B4DS13;F8VX11;F8VP89;F8VSC7;F8W0K0;F8VYE9;F8VRU1;REV__F8VX11;REV__B4DS13;REV__P23588;REV__E7EX17	EIF4B	Eukaryotic translation initiation factor 4B	>sp|P23588|IF4B_HUMAN Eukaryotic translation initiation factor 4B OS=Homo sapiens GN=EIF4B PE=1 SV=2;>tr|E7EX17|E7EX17_HUMAN Eukaryotic translation initiation factor 4B OS=Homo sapiens GN=EIF4B PE=1 SV=1;>tr|B4DS13|B4DS13_HUMAN Eukaryotic translation initi	69.15	0	13		0.914552	-0.0387917	0.774116	0.111194	51.4	28	28	0.76086	27.535	88	162890000	89076000	73815000	56.1	30	30	0.75411	25.58	78	197950000	106390000	91563000	53	29	29	1.132	31.005	73	175770000	91045000	84726000	47	26	26	1.07708	27.365	79	311780000	156650000	155130000
	22	P55769;B1AHD1	NHP2L1	NHP2-like protein 1	>sp|P55769|NH2L1_HUMAN NHP2-like protein 1 OS=Homo sapiens GN=NHP2L1 PE=1 SV=3;>tr|B1AHD1|B1AHD1_HUMAN NHP2-like protein 1 OS=Homo sapiens GN=NHP2L1 PE=1 SV=1	14.173	0.00072052	2		0.623714	-0.205015	0.774175	0.111161	0	0	0			0	0	0	0	9.4	1	1	1.1103	NaN	1	389400	234050	155350	9.4	1	1	0.962001	NaN	1	192400	77617	114780	9.4	1	1	0.227164	NaN	1	593910	137190	456730
	689	Q13464	ROCK1	Rho-associated protein kinase 1	>sp|Q13464|ROCK1_HUMAN Rho-associated protein kinase 1 OS=Homo sapiens GN=ROCK1 PE=1 SV=1	158.17	0.00067295	1		0.780284	-0.107747	0.778271	0.108869	0.7	1	1	1.227	3.4522	2	602840	233080	369760	1	1	1	0.50167	NaN	1	69672	41749	27923	0	0	0			0	0	0	0	1	1	1	0.771784	NaN	1	61644	26577	35067
	224	H0Y4S9;O00505	KPNA3	Importin subunit alpha-3	>tr|H0Y4S9|H0Y4S9_HUMAN Importin subunit alpha-4 (Fragment) OS=Homo sapiens GN=KPNA3 PE=1 SV=1;>sp|O00505|IMA4_HUMAN Importin subunit alpha-4 OS=Homo sapiens GN=KPNA3 PE=1 SV=2	9.898	0.00059517	2		0.757177	-0.120803	0.778857	0.108542	0	0	0			0	0	0	0	14.3	1	1	0.95182	NaN	1	89802	39418	50383	14.3	1	1	0.602337	NaN	1	69695	26671	43023	0	0	0			0	0	0	0
	1004	Q9P2R3;Q9P2R3-2;Q9P2R3-4;I3L3P8;I3L1Z9;K7EPT2	ANKFY1	Ankyrin repeat and FYVE domain-containing protein 1	>sp|Q9P2R3|ANFY1_HUMAN Ankyrin repeat and FYVE domain-containing protein 1 OS=Homo sapiens GN=ANKFY1 PE=1 SV=2;>sp|Q9P2R3-2|ANFY1_HUMAN Isoform 2 of Ankyrin repeat and FYVE domain-containing protein 1 OS=Homo sapiens GN=ANKFY1;>sp|Q9P2R3-4|ANFY1_HUMAN Isof	128.4	3.5293e-228	6		0.90783	-0.0419953	0.780818	0.10745	24.6	20	20	0.74479	38.876	35	30414000	17530000	12884000	24.5	19	19	0.75602	28.889	22	17645000	9462400	8182800	21	18	18	1.10758	41.428	28	14591000	7555900	7034900	21.6	19	19	1.08912	38.115	33	27160000	13808000	13353000
	314	O15226;O15226-2	NKRF	NF-kappa-B-repressing factor	>sp|O15226|NKRF_HUMAN NF-kappa-B-repressing factor OS=Homo sapiens GN=NKRF PE=1 SV=2;>sp|O15226-2|NKRF_HUMAN Isoform 2 of NF-kappa-B-repressing factor OS=Homo sapiens GN=NKRF	77.672	2.671e-12	2		0.869003	-0.0609788	0.781122	0.107281	7.1	4	4	0.77556	46.825	4	1027100	484780	542360	1.9	2	2	0.59866	0.48765	2	85447	52466	32982	1.6	1	1	1.21737	NaN	1	158750	89213	69533	3.6	2	2	1.00894	1.9802	2	310950	159700	151250
	675	Q12906;Q12906-7;Q12906-5;Q12906-4;Q12906-2;Q12906-6;Q12906-3;K7EKJ9;K7EQR9;K7ER69;K7EJ09;K7EKY0;K7EQ75;K7ERM6;K7ENK6;K7EM82;K7ELV3;Q96SI9-2;Q96SI9	ILF3	Interleukin enhancer-binding factor 3	>sp|Q12906|ILF3_HUMAN Interleukin enhancer-binding factor 3 OS=Homo sapiens GN=ILF3 PE=1 SV=3;>sp|Q12906-7|ILF3_HUMAN Isoform 7 of Interleukin enhancer-binding factor 3 OS=Homo sapiens GN=ILF3;>sp|Q12906-5|ILF3_HUMAN Isoform 5 of Interleukin enhancer-bindi	95.337	4.12e-70	19		0.918499	-0.0369214	0.783558	0.105929	17.4	14	14	0.88377	23.557	14	7279600	3903600	3376000	12	9	9	0.70618	17.928	9	2752800	1512300	1240500	16.7	13	13	1.0523	27.728	13	6390700	3220400	3170300	15.3	12	12	1.08373	18.611	15	11447000	6262900	5184100
	290	K7EPB2;P10644-2;P10644;K7EM13;K7EIE5;K7EID3;K7EJ40;K7EK41	PRKAR1A	cAMP-dependent protein kinase type I-alpha regulatory subunit;cAMP-dependent protein kinase type I-alpha regulatory subunit, N-terminally processed	>tr|K7EPB2|K7EPB2_HUMAN cAMP-dependent protein kinase type I-alpha regulatory subunit (Fragment) OS=Homo sapiens GN=PRKAR1A PE=1 SV=1;>sp|P10644-2|KAP0_HUMAN Isoform 2 of cAMP-dependent protein kinase type I-alpha regulatory subunit OS=Homo sapiens GN=PRKA	33.606	6.4606e-20	8		0.80956	-0.0917512	0.787276	0.103873	0	0	0			0	0	0	0	0	0	0			0	0	0	0	9.8	2	2	0.963484	15.868	2	476940	238840	238090	5.7	1	1	0.680226	NaN	1	355410	121340	234070
	174	E9PK09;E9PQN2;E9PKI6;Q9NYF8-3;E9PK91;Q9NYF8-2;Q9NYF8;E9PJA7;Q9NYF8-4;H0YF00	BCLAF1	Bcl-2-associated transcription factor 1	>tr|E9PK09|E9PK09_HUMAN Bcl-2-associated transcription factor 1 (Fragment) OS=Homo sapiens GN=BCLAF1 PE=1 SV=2;>tr|E9PQN2|E9PQN2_HUMAN Bcl-2-associated transcription factor 1 OS=Homo sapiens GN=BCLAF1 PE=1 SV=1;>tr|E9PKI6|E9PKI6_HUMAN Bcl-2-associated tran	83.134	1.4177e-37	10		0.869321	-0.0608198	0.788615	0.103135	19.7	11	11	0.66849	36.99	11	5057400	3097000	1960500	8.7	5	5	0.69011	4.1966	5	3839000	2312600	1526400	3.3	2	2	1.11252	14.891	2	941370	490210	451160	1.9	1	1	1.11276	NaN	1	611330	339720	271610
	908	Q9BRX9;G3V221;F8VSE4;H0YIE8	WDR83	WD repeat domain-containing protein 83	>sp|Q9BRX9|WDR83_HUMAN WD repeat domain-containing protein 83 OS=Homo sapiens GN=WDR83 PE=1 SV=1;>tr|G3V221|G3V221_HUMAN Mitogen-activated protein kinase organizer 1, isoform CRA_c OS=Homo sapiens GN=WDR83 PE=4 SV=1;>tr|F8VSE4|F8VSE4_HUMAN WD repeat domain	34.342	1.3577e-11	4		0.608248	-0.21592	0.791644	0.10147	0	0	0			0	0	0	0	4.8	1	1	0.41388	NaN	1	252910	127160	125740	0	0	0			0	0	0	0	4.8	1	1	0.893895	62.107	2	835820	352720	483100
	688	Q13425-2;Q13425;J3KT21;H0YCS0	SNTB2	Beta-2-syntrophin	>sp|Q13425-2|SNTB2_HUMAN Isoform 2 of Beta-2-syntrophin OS=Homo sapiens GN=SNTB2;>sp|Q13425|SNTB2_HUMAN Beta-2-syntrophin OS=Homo sapiens GN=SNTB2 PE=1 SV=1;>tr|J3KT21|J3KT21_HUMAN Beta-2-syntrophin (Fragment) OS=Homo sapiens GN=SNTB2 PE=4 SV=1;>tr|H0YCS0|	27.676	0.00030027	4		0.678024	-0.168755	0.792193	0.101169	0	0	0			0	0	0	0	0	0	0			0	0	0	0	8.2	2	2	0.501505	5.4731	2	155470	53049	102420	4.9	1	1	0.916674	NaN	1	128160	58154	70009
	301	O00425;O00425-2;F8WD15	IGF2BP3	Insulin-like growth factor 2 mRNA-binding protein 3	>sp|O00425|IF2B3_HUMAN Insulin-like growth factor 2 mRNA-binding protein 3 OS=Homo sapiens GN=IGF2BP3 PE=1 SV=2	63.704	0	3		0.97182	-0.012414	0.794028	0.100164	51.8	29	26	0.91088	28.623	72	164970000	82892000	82076000	53.4	29	26	0.93286	26.379	102	493650000	248230000	245420000	56	30	26	1.02963	34.317	82	164970000	82127000	82845000	49.9	26	23	1.01949	38.43	85	314730000	155310000	159420000
	206	F8VY04;P54819-6;P54819-2;F8W1A4;P54819;P54819-4;F8VZG5;P54819-3;P54819-5	AK2	Adenylate kinase 2, mitochondrial	>tr|F8VY04|F8VY04_HUMAN Adenylate kinase 2, mitochondrial OS=Homo sapiens GN=AK2 PE=1 SV=1;>sp|P54819-6|KAD2_HUMAN Isoform 6 of Adenylate kinase 2, mitochondrial OS=Homo sapiens GN=AK2;>sp|P54819-2|KAD2_HUMAN Isoform 2 of Adenylate kinase 2, mitochondrial	21.226	3.7121e-15	9		0.831316	-0.0802338	0.795167	0.0995415	22.6	3	3	0.95786	7.9314	2	879430	431250	448170	22.6	2	2	0.72149	0.4692	2	1104000	630420	473630	0	0	0			0	0	0	0	0	0	0			0	0	0	0
	201	F8VPD4;P27708;H7C3Z5;H7C2E4;H7BZB3	CAD	CAD protein;Glutamine-dependent carbamoyl-phosphate synthase;Aspartate carbamoyltransferase;Dihydroorotase	>tr|F8VPD4|F8VPD4_HUMAN CAD protein OS=Homo sapiens GN=CAD PE=1 SV=1;>sp|P27708|PYR1_HUMAN CAD protein OS=Homo sapiens GN=CAD PE=1 SV=3	236.02	5.0817e-102	5		0.924521	-0.0340834	0.797697	0.0981619	7	12	12	0.85062	18.065	17	8262300	4510100	3752200	4.6	8	8	0.75613	26.261	11	6092900	3405000	2688000	9.9	18	18	1.05078	17.016	27	8097600	4144000	3953600	10.7	19	19	1.08099	14.916	31	18303000	9383200	8920200
	545	P46777;Q5T7N0	RPL5	60S ribosomal protein L5	>sp|P46777|RL5_HUMAN 60S ribosomal protein L5 OS=Homo sapiens GN=RPL5 PE=1 SV=3	34.362	5.3217e-61	2		0.897262	-0.0470805	0.798565	0.0976898	25.9	6	6	0.72414	41.949	6	3520800	1978900	1541800	25.9	6	6	0.75849	109.97	10	6351500	4758600	1593000	24.6	7	7	1.03061	87.161	13	4343300	2028200	2315100	30	8	8	1.14502	58.536	14	7696400	3932400	3764000
	534	P39656-3;P39656;P39656-2;E7EWT1;U3KQ84	DDOST	Dolichyl-diphosphooligosaccharide--protein glycosyltransferase 48 kDa subunit	>sp|P39656-3|OST48_HUMAN Isoform 3 of Dolichyl-diphosphooligosaccharide--protein glycosyltransferase 48 kDa subunit OS=Homo sapiens GN=DDOST;>sp|P39656|OST48_HUMAN Dolichyl-diphosphooligosaccharide--protein glycosyltransferase 48 kDa subunit OS=Homo sapien	49.019	8.0206e-11	5		0.89869	-0.0463901	0.799572	0.0971422	0	0	0			0	0	0	0	7.5	3	3	0.73835	29.637	3	4502000	2562000	1940000	5.9	2	2	0.943307	120.56	2	1195100	625930	569170	5.9	2	2	1.04211	121.32	2	2351300	1176100	1175200
	761	Q5W0B1	RNF219	RING finger protein 219	>sp|Q5W0B1|RN219_HUMAN RING finger protein 219 OS=Homo sapiens GN=RNF219 PE=1 SV=1	81.116	1.1062e-13	1		0.901156	-0.0451999	0.801151	0.0962858	6.9	5	5	0.88047	18.306	7	2081400	1033100	1048300	3.4	2	2	1.2017	42.911	2	1501100	688620	812500	3.4	3	3	0.723327	12.422	3	687560	287090	400470	4.5	3	3	0.861698	5.5381	4	1266500	550950	715540
	459	P14866;M0QXS5;P14866-2;M0R1W6;M0R076;B4DVF8;M0QYL7	HNRNPL	Heterogeneous nuclear ribonucleoprotein L	>sp|P14866|HNRPL_HUMAN Heterogeneous nuclear ribonucleoprotein L OS=Homo sapiens GN=HNRNPL PE=1 SV=2;>tr|M0QXS5|M0QXS5_HUMAN Heterogeneous nuclear ribonucleoprotein L (Fragment) OS=Homo sapiens GN=HNRNPL PE=1 SV=1;>sp|P14866-2|HNRPL_HUMAN Isoform 2 of Hete	64.132	9.1634e-213	7		0.844641	-0.073328	0.807492	0.0928619	31.9	12	7	0.61774	20.571	18	11085000	6699700	4385100	39.2	14	8	0.65477	20.513	15	16086000	9646500	6439300	37.9	14	7	1.16446	24.174	16	11265000	6184200	5080800	30.6	11	6	1.08061	22.653	13	17026000	8949200	8076400
	863	Q96A33;Q96A33-2;J3QR89	CCDC47	Coiled-coil domain-containing protein 47	>sp|Q96A33|CCD47_HUMAN Coiled-coil domain-containing protein 47 OS=Homo sapiens GN=CCDC47 PE=1 SV=1;>sp|Q96A33-2|CCD47_HUMAN Isoform 2 of Coiled-coil domain-containing protein 47 OS=Homo sapiens GN=CCDC47	55.873	2.5338e-12	3		0.903221	-0.0442058	0.811538	0.0906912	3.7	2	2	0.772	4.9942	2	752360	448480	303880	7.5	3	3	0.74802	12.944	3	707490	411180	296320	4.1	3	3	1.08107	NaN	1	339150	170440	168710	9.5	5	5	1.06609	14.416	5	2668300	1267800	1400400
	706	Q14573	ITPR3	Inositol 1,4,5-trisphosphate receptor type 3	>sp|Q14573|ITPR3_HUMAN Inositol 1,4,5-trisphosphate receptor type 3 OS=Homo sapiens GN=ITPR3 PE=1 SV=2	304.1	7.438e-08	1		0.933496	-0.0298876	0.812833	0.0899987	0.9	3	2	0.97703	18.364	3	774910	359540	415370	0	0	0			0	0	0	0	0	0	0			0	0	0	0	0.6	2	1	0.891902	8.3785	2	546080	285810	260270
	289	Q9BTD8-4;Q9BTD8-2;Q9BTD8-3;K7EP90;Q9BTD8;K7ER08;K7EQ03	RBM42	RNA-binding protein 42	>sp|Q9BTD8-4|RBM42_HUMAN Isoform 4 of RNA-binding protein 42 OS=Homo sapiens GN=RBM42;>sp|Q9BTD8-2|RBM42_HUMAN Isoform 2 of RNA-binding protein 42 OS=Homo sapiens GN=RBM42;>sp|Q9BTD8-3|RBM42_HUMAN Isoform 3 of RNA-binding protein 42 OS=Homo sapiens GN=RBM4	47.025	8.3987e-07	7		0.871622	-0.0596719	0.812969	0.0899259	4.5	2	2	1.2892	38.82	2	520590	251960	268630	2.5	1	1	0.73276	NaN	1	239240	137550	101690	2.5	1	1	0.804117	NaN	1	287480	130010	157460	6.3	2	2	0.759821	20.834	2	765150	361990	403160
	58	Q9H0D6-2;B4DZC3;Q9H0D6	XRN2	5-3 exoribonuclease 2	>sp|Q9H0D6-2|XRN2_HUMAN Isoform 2 of 5-3 exoribonuclease 2 OS=Homo sapiens GN=XRN2;>tr|B4DZC3|B4DZC3_HUMAN 5-3 exoribonuclease 2 OS=Homo sapiens GN=XRN2 PE=1 SV=1;>sp|Q9H0D6|XRN2_HUMAN 5-3 exoribonuclease 2 OS=Homo sapiens GN=XRN2 PE=1 SV=1	99.96	2.596e-90	3		0.905978	-0.0428824	0.822104	0.085073	13.6	9	9	0.85397	20.689	11	4023900	2198000	1826000	6.3	4	4	0.73071	16.506	4	2859200	1657100	1202100	16	10	10	1.01351	20.485	11	4165300	2120000	2045400	19.1	12	12	1.06526	17.717	13	6228300	3064500	3163800
	650	Q00577	PURA	Transcriptional activator protein Pur-alpha	>sp|Q00577|PURA_HUMAN Transcriptional activator protein Pur-alpha OS=Homo sapiens GN=PURA PE=1 SV=2	34.91	1.5961e-24	1		0.651878	-0.185834	0.822283	0.0849788	9.3	2	2	0.8827	63.829	2	1350000	689370	660640	7.1	1	1	0.32374	NaN	1	836510	594640	241870	0	0	0			0	0	0	0	9.9	2	2	0.969368	55.595	5	1565500	665500	900000
	899	Q99832-3;Q99832;F5GZK5;Q99832-4;B7Z1C9;Q99832-2;F8WAM2	CCT7	T-complex protein 1 subunit eta	>sp|Q99832-3|TCPH_HUMAN Isoform 3 of T-complex protein 1 subunit eta OS=Homo sapiens GN=CCT7;>sp|Q99832|TCPH_HUMAN T-complex protein 1 subunit eta OS=Homo sapiens GN=CCT7 PE=1 SV=2;>tr|F5GZK5|F5GZK5_HUMAN T-complex protein 1 subunit eta OS=Homo sapiens GN=	54.804	0	7		0.978279	-0.00953723	0.823306	0.0844386	47.5	19	19	0.99825	31.987	23	26039000	12257000	13781000	49.9	19	19	1.0236	18.453	21	26908000	13152000	13755000	45.5	18	18	0.957579	23.093	19	15539000	7294500	8244900	51.1	21	21	0.936067	24.558	25	42479000	19657000	22822000
	789	Q7L7X3-3;Q7L7X3;Q7L7X3-2;Q9UL54-2;Q9UL54-4;Q9UL54;H0YF68;Q9UL54-3	TAOK1	Serine/threonine-protein kinase TAO1	>sp|Q7L7X3-3|TAOK1_HUMAN Isoform 3 of Serine/threonine-protein kinase TAO1 OS=Homo sapiens GN=TAOK1;>sp|Q7L7X3|TAOK1_HUMAN Serine/threonine-protein kinase TAO1 OS=Homo sapiens GN=TAOK1 PE=1 SV=1;>sp|Q7L7X3-2|TAOK1_HUMAN Isoform 2 of Serine/threonine-protei	97.525	1.6231e-29	8		0.673586	-0.171607	0.830747	0.0805312	0	0	0			0	0	0	0	9.4	7	6	0.84945	10.029	7	3018300	1561900	1456400	0	0	0			0	0	0	0	1.3	1	1	0.534131	NaN	1	61210	20999	40211
	714	Q15365	PCBP1	Poly(rC)-binding protein 1	>sp|Q15365|PCBP1_HUMAN Poly(rC)-binding protein 1 OS=Homo sapiens GN=PCBP1 PE=1 SV=2	37.497	1.5092e-181	1		0.855469	-0.0677958	0.830975	0.0804121	18.5	4	2	0.62642	57.396	2	1120000	656570	463460	19.1	4	2	0.74039	106.41	2	1634800	858490	776300	26.7	6	4	1.15499	91.945	6	2800600	1442000	1358700	16.9	4	2	0.9998	74.95	4	3797200	1880200	1917000
	465	P16989;P16989-2;P16989-3;H0YG22	YBX3	Y-box-binding protein 3	>sp|P16989|YBOX3_HUMAN Y-box-binding protein 3 OS=Homo sapiens GN=YBX3 PE=1 SV=4;>sp|P16989-2|YBOX3_HUMAN Isoform 2 of Y-box-binding protein 3 OS=Homo sapiens GN=YBX3;>sp|P16989-3|YBOX3_HUMAN Isoform 3 of Y-box-binding protein 3 OS=Homo sapiens GN=YBX3	40.089	8.933e-261	4		0.905071	-0.0433171	0.832719	0.0795016	29.8	9	5	0.95399	6.8443	5	4298900	2197900	2101000	16.1	5	1	0.70338	41.088	5	4155300	2429000	1726300	38.4	12	6	0.945895	33.29	8	4687300	2215400	2471900	29.8	8	4	1.05719	9.9898	4	6671200	3288100	3383100
	853	Q92504	SLC39A7	Zinc transporter SLC39A7	>sp|Q92504|S39A7_HUMAN Zinc transporter SLC39A7 OS=Homo sapiens GN=SLC39A7 PE=1 SV=2	50.117	0.00025512	1		0.70478	-0.151947	0.840335	0.0755478	3	1	1	0.85738	NaN	1	224740	115170	109570	3	1	1	0.57934	NaN	1	293770	172640	121130	0	0	0			0	0	0	0	0	0	0			0	0	0	0
	371	O95758-1;O95758-6;O95758-2;O95758;O95758-5;O95758-4;O95758-7;X6R242	PTBP3	Polypyrimidine tract-binding protein 3	>sp|O95758-1|PTBP3_HUMAN Isoform 1 of Polypyrimidine tract-binding protein 3 OS=Homo sapiens GN=PTBP3;>sp|O95758-6|PTBP3_HUMAN Isoform 6 of Polypyrimidine tract-binding protein 3 OS=Homo sapiens GN=PTBP3;>sp|O95758-2|PTBP3_HUMAN Isoform 2 of Polypyrimidine	56.501	1.2093e-29	8		0.950878	-0.0218752	0.840534	0.0754447	8.3	3	3	0.88907	23.486	3	1050100	604210	445940	14.4	5	5	0.86539	13.793	5	1589300	831160	758170	7.9	3	3	1.03324	11.09	3	1056000	520210	535810	6.3	3	3	1.02837	13.329	3	1428100	607840	820250
	848	Q8WWW0-2;Q8WWW0	RASSF5	Ras association domain-containing protein 5	>sp|Q8WWW0-2|RASF5_HUMAN Isoform 2 of Ras association domain-containing protein 5 OS=Homo sapiens GN=RASSF5;>sp|Q8WWW0|RASF5_HUMAN Ras association domain-containing protein 5 OS=Homo sapiens GN=RASSF5 PE=1 SV=1	30.358	0.00019328	2		0.784152	-0.1056	0.846411	0.0724186	0	0	0			0	0	0	0	0	0	0			0	0	0	0	5.7	1	1	0.884956	NaN	1	98544	37842	60703	5.7	1	1	0.69483	NaN	1	191230	82263	108970
	787	Q7L2H7;J3KNJ2;B4E2Q4;E9PN86;H0YCQ8;E9PRY0;E9PRI2;E7ESM3	EIF3M	Eukaryotic translation initiation factor 3 subunit M	>sp|Q7L2H7|EIF3M_HUMAN Eukaryotic translation initiation factor 3 subunit M OS=Homo sapiens GN=EIF3M PE=1 SV=1;>tr|J3KNJ2|J3KNJ2_HUMAN Eukaryotic translation initiation factor 3 subunit M (Fragment) OS=Homo sapiens GN=EIF3M PE=1 SV=1;>tr|B4E2Q4|B4E2Q4_HUMA	42.502	1.8536e-42	8		0.916803	-0.0377239	0.847539	0.0718402	14.7	4	4	1.0989	101.93	4	2028400	1030500	997860	21.7	7	7	0.95526	49.382	7	4283300	2245300	2038100	8.6	2	2	0.858295	30.202	2	263480	111760	151710	17.6	5	5	0.784129	29.992	5	2605100	1248800	1356300
	176	E9PP36;E9PKZ0;E9PKU4;P62917	RPL8	60S ribosomal protein L8	>tr|E9PP36|E9PP36_HUMAN 60S ribosomal protein L8 OS=Homo sapiens GN=RPL8 PE=1 SV=1;>tr|E9PKZ0|E9PKZ0_HUMAN 60S ribosomal protein L8 (Fragment) OS=Homo sapiens GN=RPL8 PE=1 SV=1;>tr|E9PKU4|E9PKU4_HUMAN 60S ribosomal protein L8 (Fragment) OS=Homo sapiens GN=	16.18	3.8662e-06	4		0.869388	-0.0607864	0.848743	0.0712238	0	0	0			0	0	0	0	7.4	1	1	0.74044	NaN	1	372380	194630	177740	12.2	2	2	1.0496	66.267	2	645440	297910	347520	7.4	1	1	0.845523	NaN	1	449340	200220	249120
	681	Q13151	HNRNPA0	Heterogeneous nuclear ribonucleoprotein A0	>sp|Q13151|ROA0_HUMAN Heterogeneous nuclear ribonucleoprotein A0 OS=Homo sapiens GN=HNRNPA0 PE=1 SV=1	30.84	1.7883e-129	1		0.824724	-0.0836914	0.851454	0.0698388	28.9	7	7	0.58518	64.896	7	4977300	2939700	2037600	31.8	6	6	0.68255	62.421	9	26230000	9440400	16789000	29.2	5	5	1.08344	56.697	6	7587900	4538800	3049100	25.2	5	5	1.06907	71.777	7	8020100	4238900	3781200
	557	P49327	FASN	Fatty acid synthase;[Acyl-carrier-protein] S-acetyltransferase;[Acyl-carrier-protein] S-malonyltransferase;3-oxoacyl-[acyl-carrier-protein] synthase;3-oxoacyl-[acyl-carrier-protein] reductase;3-hydroxyacyl-[acyl-carrier-protein] dehydratase;Enoyl-[acyl-carrier-protein] reductase;Oleoyl-[acyl-carrier-protein] hydrolase	>sp|P49327|FAS_HUMAN Fatty acid synthase OS=Homo sapiens GN=FASN PE=1 SV=3	273.42	3.0743e-25	1		0.834685	-0.0784773	0.851886	0.0696186	2.1	4	4	0.73937	9.1304	5	1367300	737120	630180	0.4	1	1	0.59622	NaN	1	416960	251470	165490	2	4	4	0.956846	7.61	4	669080	330540	338540	1.1	2	2	1.15075	6.3769	2	607860	287870	319990
	238	H3BPK3;Q16775-2;Q16775;H3BPQ4;H3BV79;H3BQW8;Q16775-3	HAGH	Hydroxyacylglutathione hydrolase, mitochondrial	>tr|H3BPK3|H3BPK3_HUMAN Hydroxyacylglutathione hydrolase, mitochondrial (Fragment) OS=Homo sapiens GN=HAGH PE=1 SV=1;>sp|Q16775-2|GLO2_HUMAN Isoform 2 of Hydroxyacylglutathione hydrolase, mitochondrial OS=Homo sapiens GN=HAGH;>sp|Q16775|GLO2_HUMAN Hydroxya	26.305	5.93e-89	7		0.906343	-0.0427075	0.852911	0.0690962	31.8	7	7	0.7759	77.583	10	17173000	9644700	7528000	46.9	9	9	0.81087	89.437	13	22374000	12370000	10004000	35.6	7	7	1.05266	40.856	10	14821000	7901300	6920200	31	6	6	1.01888	33.916	9	21243000	11093000	10149000
	408	Q99878;Q96KK5;Q9BTM1;Q16777;Q93077;Q7L7L0;Q6FI13;P20671;P0C0S8;P04908;H0YFX9;Q96QV6;P16104;Q9BTM1-2;Q71UI9-5;Q8IUE6	HIST1H2AJ;HIST1H2AH;H2AFJ;HIST2H2AC;HIST1H2AC;HIST3H2A;HIST2H2AA3;HIST1H2AD;HIST1H2AG;HIST1H2AB;HIST1H2AA;H2AFX	Histone H2A type 1-J;Histone H2A type 1-H;Histone H2A.J;Histone H2A type 2-C;Histone H2A type 1-C;Histone H2A type 3;Histone H2A type 2-A;Histone H2A type 1-D;Histone H2A type 1;Histone H2A type 1-B/E;Histone H2A;Histone H2A type 1-A;Histone H2A.x	>sp|Q99878|H2A1J_HUMAN Histone H2A type 1-J OS=Homo sapiens GN=HIST1H2AJ PE=1 SV=3;>sp|Q96KK5|H2A1H_HUMAN Histone H2A type 1-H OS=Homo sapiens GN=HIST1H2AH PE=1 SV=3;>sp|Q9BTM1|H2AJ_HUMAN Histone H2A.J OS=Homo sapiens GN=H2AFJ PE=1 SV=1;>sp|Q16777|H2A2C_HU	13.936	2.3999e-33	16		0.715254	-0.14554	0.854911	0.0680789	14.8	1	1	0.47408	NaN	1	1125500	782600	342940	27.3	3	1	0.4319	NaN	1	3391500	2332100	1059400	27.3	3	1	1.18254	NaN	1	1325000	679960	645040	32.8	4	2	1.08092	47.988	14	11054000	5899100	5155100
	799	Q86TM6-2;Q86TM6-3;Q86TM6;H0YCR6;E9PN88;E9PK19	SYVN1	E3 ubiquitin-protein ligase synoviolin	>sp|Q86TM6-2|SYVN1_HUMAN Isoform 2 of E3 ubiquitin-protein ligase synoviolin OS=Homo sapiens GN=SYVN1;>sp|Q86TM6-3|SYVN1_HUMAN Isoform 3 of E3 ubiquitin-protein ligase synoviolin OS=Homo sapiens GN=SYVN1;>sp|Q86TM6|SYVN1_HUMAN E3 ubiquitin-protein ligase s	61.731	1.4715e-08	6		0.736633	-0.132749	0.855335	0.067864	2.1	1	1	0.52654	NaN	1	434530	259030	175500	4.4	2	2	0.6963	32.337	2	1783300	1076100	707200	0	0	0			0	0	0	0	2.1	1	1	1.09025	NaN	1	783120	349640	433480
	199	Q5JPE7-3;F5H826;Q5JPE7-2;Q15155;P69849;Q5JPE7;J3KN36;H3BUC9	NOMO3;NOMO1;NOMO2	Nodal modulator 1;Nodal modulator 3;Nodal modulator 2	>sp|Q5JPE7-3|NOMO2_HUMAN Isoform 3 of Nodal modulator 2 OS=Homo sapiens GN=NOMO2;>tr|F5H826|F5H826_HUMAN Nodal modulator 3 OS=Homo sapiens GN=NOMO3 PE=4 SV=1;>sp|Q5JPE7-2|NOMO2_HUMAN Isoform 2 of Nodal modulator 2 OS=Homo sapiens GN=NOMO2;>sp|Q15155|NOMO1_	122.06	8.9031e-16	8		0.875125	-0.05793	0.862033	0.0644761	1.4	1	1	0.82107	NaN	1	302670	175930	126740	0	0	0			0	0	0	0	1.4	1	1	0.781677	NaN	1	151440	67475	83967	1	1	1	1.04424	NaN	1	187260	97325	89937
	190	H0Y3K0;F5H4G7;O60684;O15131;P52294;F5GYL8	KPNA5;KPNA6;KPNA1	Importin subunit alpha;Importin subunit alpha-7;Importin subunit alpha-6;Importin subunit alpha-1	>tr|H0Y3K0|H0Y3K0_HUMAN Importin subunit alpha-6 (Fragment) OS=Homo sapiens GN=KPNA5 PE=4 SV=1;>tr|F5H4G7|F5H4G7_HUMAN Importin subunit alpha OS=Homo sapiens GN=KPNA6 PE=1 SV=1;>sp|O60684|IMA7_HUMAN Importin subunit alpha-7 OS=Homo sapiens GN=KPNA6 PE=1 SV	13.778	2.1087e-06	6		0.655536	-0.183404	0.862906	0.0640364	11.5	1	1	0.53804	NaN	1	124380	70457	53919	11.5	1	1	0.79869	NaN	1	112530	55390	57144	0	0	0			0	0	0	0	0	0	0			0	0	0	0
	652	Q00765;E2QRG8	REEP5	Receptor expression-enhancing protein 5	>sp|Q00765|REEP5_HUMAN Receptor expression-enhancing protein 5 OS=Homo sapiens GN=REEP5 PE=1 SV=3;>tr|E2QRG8|E2QRG8_HUMAN Receptor expression-enhancing protein 5 (Fragment) OS=Homo sapiens GN=REEP5 PE=1 SV=1	21.493	5.3204e-05	2		0.94507	-0.0245358	0.865148	0.0629094	5.8	1	1	0.87964	NaN	1	618810	321500	297310	10.1	2	2	0.94972	1.4853	2	1312100	635530	676530	0	0	0			0	0	0	0	4.2	1	1	1.0104	78.394	2	842460	413880	428570
	865	Q96AG4;I3L223	LRRC59	Leucine-rich repeat-containing protein 59	>sp|Q96AG4|LRC59_HUMAN Leucine-rich repeat-containing protein 59 OS=Homo sapiens GN=LRRC59 PE=1 SV=1	34.93	2.2771e-37	2		0.947521	-0.023411	0.866772	0.0620953	24.8	6	6	0.92295	50.533	7	8633500	4182800	4450700	28.3	6	6	0.94997	60.609	7	14461000	7413300	7047200	24.4	5	5	0.868659	87.198	6	5084000	2415800	2668200	27.7	6	6	1.05832	82.377	7	12801000	6446700	6354300
	21	J3KSC4;J3QLK0;B1AH77;B1AH78;B1AH80;P63000;P60763;P15153;P63000-2	RAC3;RAC2;RAC1	Ras-related C3 botulinum toxin substrate 1;Ras-related C3 botulinum toxin substrate 3;Ras-related C3 botulinum toxin substrate 2	>tr|J3KSC4|J3KSC4_HUMAN Ras-related C3 botulinum toxin substrate 3 (Fragment) OS=Homo sapiens GN=RAC3 PE=1 SV=1;>tr|J3QLK0|J3QLK0_HUMAN Ras-related C3 botulinum toxin substrate 3 (Fragment) OS=Homo sapiens GN=RAC3 PE=1 SV=1;>tr|B1AH77|B1AH77_HUMAN Ras-rela	14.831	0.0012926	9		0.644308	-0.190906	0.869154	0.0609032	7.7	1	1	0.52925	NaN	1	415300	311970	103330	7.7	1	1	0.78438	NaN	1	961590	551760	409840	7.7	1	1			0	0	0	0	0	0	0			0	0	0	0
	409	P05023-2;P05023-3;P05023-4;P05023	ATP1A1	Sodium/potassium-transporting ATPase subunit alpha-1	>sp|P05023-2|AT1A1_HUMAN Isoform 2 of Sodium/potassium-transporting ATPase subunit alpha-1 OS=Homo sapiens GN=ATP1A1;>sp|P05023-3|AT1A1_HUMAN Isoform 3 of Sodium/potassium-transporting ATPase subunit alpha-1 OS=Homo sapiens GN=ATP1A1;>sp|P05023-4|AT1A1_HUM	74.139	0.00078664	4		0.619922	-0.207663	0.871119	0.0599225	0	0	0			0	0	0	0	1.9	1	1	0.50363	NaN	1	222750	163220	59523	0	0	0			0	0	0	0	1.6	1	1	0.763068	NaN	1	328470	119000	209470
	440	P11021	HSPA5	78 kDa glucose-regulated protein	>sp|P11021|GRP78_HUMAN 78 kDa glucose-regulated protein OS=Homo sapiens GN=HSPA5 PE=1 SV=2	72.332	0	1		0.905721	-0.0430056	0.872742	0.0591141	51.2	33	32	0.8203	23.136	66	96983000	53196000	43786000	56.4	39	38	0.7832	27.207	89	319600000	174310000	145290000	49.1	32	31	1.03231	36.165	59	135260000	67223000	68035000	48	33	32	1.01466	34.806	64	241380000	118250000	123130000
	418	P07237;F5H8J2;H7BZ94;H0Y3Z3;I3L398;I3L312;I3L4M2;I3NI03;I3L0S0;I3L3U6;I3L3P5;I3L1Y5;I3L514	P4HB	Protein disulfide-isomerase	>sp|P07237|PDIA1_HUMAN Protein disulfide-isomerase OS=Homo sapiens GN=P4HB PE=1 SV=3;>tr|F5H8J2|F5H8J2_HUMAN Uncharacterized protein OS=Homo sapiens GN=P4HB PE=1 SV=1;>tr|H7BZ94|H7BZ94_HUMAN Protein disulfide-isomerase OS=Homo sapiens GN=P4HB PE=1 SV=2;>tr	57.116	2.003e-108	13		0.93316	-0.0300437	0.873892	0.0585421	30.5	14	14	0.90086	23.416	14	6762000	3520500	3241500	21.3	10	10	0.82961	18.043	10	5590800	2918500	2672400	23.2	11	11	1.01366	22.51	11	3602900	1838700	1764200	28.5	12	12	1.00092	9.3324	13	10342000	5271500	5070800
	733	Q3V6T2-2;Q3V6T2;Q3V6T2-4;Q3V6T2-3;Q3V6T2-5;H7C2C6;H0Y470;H0Y7U8;C9J225;B3KW94;H0Y7K3	CCDC88A	Girdin	>sp|Q3V6T2-2|GRDN_HUMAN Isoform 2 of Girdin OS=Homo sapiens GN=CCDC88A;>sp|Q3V6T2|GRDN_HUMAN Girdin OS=Homo sapiens GN=CCDC88A PE=1 SV=2;>sp|Q3V6T2-4|GRDN_HUMAN Isoform 4 of Girdin OS=Homo sapiens GN=CCDC88A;>sp|Q3V6T2-3|GRDN_HUMAN Isoform 3 of Girdin OS=H	212.62	1.685e-29	11		0.810955	-0.0910031	0.875248	0.0578687	4	6	6	0.67091	31.692	6	2160500	1275000	885490	0.7	1	1	1.2164	NaN	1	270610	113080	157530	2.2	4	3	0.668762	30.339	3	781180	270560	510620	5	8	8	0.792456	45.667	9	3755000	1663300	2091800
	550	P46977;P46977-2;E9PN73;E9PI32;H0YET6	STT3A	Dolichyl-diphosphooligosaccharide--protein glycosyltransferase subunit STT3A	>sp|P46977|STT3A_HUMAN Dolichyl-diphosphooligosaccharide--protein glycosyltransferase subunit STT3A OS=Homo sapiens GN=STT3A PE=1 SV=2;>sp|P46977-2|STT3A_HUMAN Isoform 2 of Dolichyl-diphosphooligosaccharide--protein glycosyltransferase subunit STT3A OS=Hom	80.529	7.6879e-17	5		0.890283	-0.0504717	0.876411	0.0572923	5.8	4	4	0.85526	25.101	4	1223300	624640	598650	1.4	1	1	0.73189	NaN	1	205860	133310	72542	5.5	4	4	0.989218	18.717	4	1310900	591570	719290	8.1	6	6	1.01456	15.453	6	3515500	1673900	1841700
	166	Q7KZI7-15;Q7KZI7-16;E9PC69;Q7KZI7-5;Q7KZI7-4;Q7KZI7-9;Q7KZI7-11;Q7KZI7-8;Q7KZI7;Q7KZI7-13;E7ETY4;Q7KZI7-14;Q7KZI7-10;Q7KZI7-7;Q7KZI7-2;Q7KZI7-12;Q7KZI7-3;Q7KZI7-6;F5H4F6;F5H6N2;F5H4J8	MARK2	Serine/threonine-protein kinase MARK2	>sp|Q7KZI7-15|MARK2_HUMAN Isoform 15 of Serine/threonine-protein kinase MARK2 OS=Homo sapiens GN=MARK2;>sp|Q7KZI7-16|MARK2_HUMAN Isoform 16 of Serine/threonine-protein kinase MARK2 OS=Homo sapiens GN=MARK2;>tr|E9PC69|E9PC69_HUMAN Serine/threonine-protein k	79.426	1.1833e-130	21		0.931795	-0.0306794	0.877403	0.0568009	27.8	15	11	0.90481	34.874	12	5024500	2639000	2385500	11.1	6	4	0.8302	15.226	4	1647600	875340	772270	27.4	14	11	1.0428	27.632	15	5506500	2693400	2813100	21.9	12	8	0.962371	30.423	11	6787500	3394900	3392600
	645	P84090;G3V279	ERH	Enhancer of rudimentary homolog	>sp|P84090|ERH_HUMAN Enhancer of rudimentary homolog OS=Homo sapiens GN=ERH PE=1 SV=1;>tr|G3V279|G3V279_HUMAN Enhancer of rudimentary homolog OS=Homo sapiens GN=ERH PE=1 SV=1	12.259	2.9974e-138	2		0.809884	-0.0915771	0.877799	0.056605	41.3	4	4	0.58316	45.149	4	10261000	6194700	4066300	49	5	5	0.69302	46.836	8	47871000	28392000	19479000	56.7	6	6	1.04406	79.937	8	22120000	11129000	10990000	41.3	3	3	1.01961	55.776	6	24671000	11995000	12676000
	810	Q8IWJ2;H7BYJ9;B8ZZW2	GCC2	GRIP and coiled-coil domain-containing protein 2	>sp|Q8IWJ2|GCC2_HUMAN GRIP and coiled-coil domain-containing protein 2 OS=Homo sapiens GN=GCC2 PE=1 SV=4;>tr|H7BYJ9|H7BYJ9_HUMAN GRIP and coiled-coil domain-containing protein 2 (Fragment) OS=Homo sapiens GN=GCC2 PE=1 SV=1	195.91	1.2165e-10	3		0.466815	-0.330855	0.879369	0.0558289	1.4	2	2	0.77488	32.762	2	968780	522230	446550	0.8	1	1	0.18588	NaN	1	742110	557870	184250	1.7	2	2	0.706265	NaN	1	152720	44859	107860	0	0	0			0	0	0	0
	917	Q9BVP2-2;Q9BVP2	GNL3	Guanine nucleotide-binding protein-like 3	>sp|Q9BVP2-2|GNL3_HUMAN Isoform 2 of Guanine nucleotide-binding protein-like 3 OS=Homo sapiens GN=GNL3;>sp|Q9BVP2|GNL3_HUMAN Guanine nucleotide-binding protein-like 3 OS=Homo sapiens GN=GNL3 PE=1 SV=2	60.54	3.6105e-07	2		0.815362	-0.0886494	0.880058	0.0554885	4.3	2	2	0.63892	4.085	2	345630	203380	142250	0	0	0			0	0	0	0	2.8	1	1	0.884721	3.6128	2	110040	46757	63279	2.8	1	1	0.958957	NaN	1	248150	140670	107480
	679	Q13043-2;Q13043	STK4	Serine/threonine-protein kinase 4;Serine/threonine-protein kinase 4 37kDa subunit;Serine/threonine-protein kinase 4 18kDa subunit	>sp|Q13043-2|STK4_HUMAN Isoform 2 of Serine/threonine-protein kinase 4 OS=Homo sapiens GN=STK4;>sp|Q13043|STK4_HUMAN Serine/threonine-protein kinase 4 OS=Homo sapiens GN=STK4 PE=1 SV=2	52.335	9.4792e-12	2		0.770778	-0.113071	0.881274	0.0548889	3.5	1	1	0.85675	NaN	1	91771	44232	47539	0	0	0			0	0	0	0	9.3	3	1	0.693433	NaN	1	40843	15032	25811	5.8	2	0			0	0	0	0
	81	Q14061;C9J8T6;H7C4E5	COX17	Cytochrome c oxidase copper chaperone	>sp|Q14061|COX17_HUMAN Cytochrome c oxidase copper chaperone OS=Homo sapiens GN=COX17 PE=1 SV=2;>tr|C9J8T6|C9J8T6_HUMAN Cytochrome c oxidase copper chaperone OS=Homo sapiens GN=COX17 PE=1 SV=1;>tr|H7C4E5|H7C4E5_HUMAN Cytochrome c oxidase copper chaperone (	6.9151	3.4756e-12	3		0.827411	-0.0822785	0.881958	0.0545522	0	0	0			0	0	0	0	46	2	2	1.0258	6.0435	2	570840	284880	285950	20.6	1	1	0.688326	NaN	1	80833	38577	42256	20.6	1	1	0.802246	NaN	1	204560	86950	117610
	223	P31943;G8JLB6;E9PCY7;H0YB39;D6RIT2;D6RIU0;D6RBM0;E7EQJ0;D6RAM1;E5RGV0;D6R9T0;D6RFM3;D6RDU3;D6RJ04;D6RIH9;H0YBG7;H0YBD7;P55795;E5RGH4;F5GZT4;E7EN40;D6RDL0;H0YAQ2;D6R9D3;D6RF17	HNRNPH1	Heterogeneous nuclear ribonucleoprotein H;Heterogeneous nuclear ribonucleoprotein H, N-terminally processed	>sp|P31943|HNRH1_HUMAN Heterogeneous nuclear ribonucleoprotein H OS=Homo sapiens GN=HNRNPH1 PE=1 SV=4;>tr|G8JLB6|G8JLB6_HUMAN Heterogeneous nuclear ribonucleoprotein H OS=Homo sapiens GN=HNRNPH1 PE=1 SV=1;>tr|E9PCY7|E9PCY7_HUMAN Heterogeneous nuclear ribon	49.229	4.5453e-136	25		0.824712	-0.0836977	0.884319	0.0533909	17.6	5	3	0.69391	91.941	4	4377100	2759100	1617900	20.5	6	4	0.63782	65.364	6	6523100	4224300	2298800	13.4	4	2	1.08713	69.422	4	2184000	1086900	1097100	31.6	9	7	0.961446	22.175	10	5418500	2709500	2708900
	629	P68032;P63267;P62736;P68133;Q5T8M7;Q5T8M8;A6NL76;P63267-2;C9JUM1;F8WB63;B8ZZJ2;C9JFL5;F6UVQ4;F6QUT6;F8WCH0	ACTC1;ACTG2;ACTA2;ACTA1	Actin, alpha cardiac muscle 1;Actin, gamma-enteric smooth muscle;Actin, aortic smooth muscle;Actin, alpha skeletal muscle	>sp|P68032|ACTC_HUMAN Actin, alpha cardiac muscle 1 OS=Homo sapiens GN=ACTC1 PE=1 SV=1;>sp|P63267|ACTH_HUMAN Actin, gamma-enteric smooth muscle OS=Homo sapiens GN=ACTG2 PE=1 SV=1;>sp|P62736|ACTA_HUMAN Actin, aortic smooth muscle OS=Homo sapiens GN=ACTA2 PE	42.019	3.0846e-116	15		0.707471	-0.150291	0.889127	0.0510361	28.9	12	1	0.5481	132.7	2	3146700	2147400	999350	32.6	15	1	0.617	86.079	5	13076000	7987700	5088000	31	13	1	0.5428	112.47	5	5001300	1617900	3383400	48.3	18	2	1.36474	157.16	4	6292100	2569900	3722200
	568	P50991;B7Z9L0;P50991-2;B7Z2F4	CCT4	T-complex protein 1 subunit delta	>sp|P50991|TCPD_HUMAN T-complex protein 1 subunit delta OS=Homo sapiens GN=CCT4 PE=1 SV=4;>tr|B7Z9L0|B7Z9L0_HUMAN T-complex protein 1 subunit delta OS=Homo sapiens GN=CCT4 PE=1 SV=1;>sp|P50991-2|TCPD_HUMAN Isoform 2 of T-complex protein 1 subunit delta OS=	57.924	5.1031e-190	4		0.985575	-0.0063103	0.892415	0.0494331	34.7	17	17	1.0009	10.183	18	23350000	11402000	11948000	36.2	17	17	1.0008	12.447	19	23729000	11844000	11885000	32.8	16	16	0.986582	12.425	18	14460000	6788800	7671200	38.4	18	18	0.954745	13.135	22	34331000	16190000	18140000
	265	O75592-2;O75592;J3KPZ3;H7C3U4	MYCBP2	Probable E3 ubiquitin-protein ligase MYCBP2	>sp|O75592-2|MYCB2_HUMAN Isoform 2 of E3 ubiquitin-protein ligase MYCBP2 OS=Homo sapiens GN=MYCBP2;>sp|O75592|MYCB2_HUMAN E3 ubiquitin-protein ligase MYCBP2 OS=Homo sapiens GN=MYCBP2 PE=1 SV=3;>tr|J3KPZ3|J3KPZ3_HUMAN E3 ubiquitin-protein ligase MYCBP2 OS=H	509.7	2.1224e-11	4		0.697719	-0.15632	0.895028	0.0481633	0.9	3	3	0.89314	23.656	3	608720	294900	313820	0.4	1	1	0.47324	NaN	1	139700	87332	52366	0.2	1	1	0.8036	NaN	1	66549	18280	48269	0	0	0			0	0	0	0
	4	P35611-2;E7EV99;A2A3N8;E7ENY0;P35611;P35611-3;P35611-5;P35611-4;D6RF25;H0Y9H2;D6RJE2;D6RAH3;P35612-2;P35612-8;P35612-9;P35612-4;P35612-3;P35612	ADD1	Alpha-adducin	>sp|P35611-2|ADDA_HUMAN Isoform 2 of Alpha-adducin OS=Homo sapiens GN=ADD1;>tr|E7EV99|E7EV99_HUMAN Alpha-adducin OS=Homo sapiens GN=ADD1 PE=1 SV=1;>tr|A2A3N8|A2A3N8_HUMAN Adducin 1 (Alpha) OS=Homo sapiens GN=ADD1 PE=1 SV=1;>tr|E7ENY0|E7ENY0_HUMAN Alpha-add	69.984	4.0595e-10	18		0.695633	-0.15762	0.895736	0.0478201	4.8	3	3	0.47127	23.41	3	995940	640150	355790	0	0	0			0	0	0	0	1.6	1	1	0.910498	NaN	1	349560	157330	192230	3.6	2	2	0.784498	17.949	2	490250	228050	262210
	721	Q15904	ATP6AP1	V-type proton ATPase subunit S1	>sp|Q15904|VAS1_HUMAN V-type proton ATPase subunit S1 OS=Homo sapiens GN=ATP6AP1 PE=1 SV=2	52.025	1.6502e-18	1		0.764016	-0.116897	0.897584	0.0469251	3.8	1	1	0.69503	NaN	1	109520	64691	44829	3.8	1	1	0.83985	NaN	1	135530	71816	63717	0	0	0			0	0	0	0	0	0	0			0	0	0	0
	616	P62805	HIST1H4A	Histone H4	>sp|P62805|H4_HUMAN Histone H4 OS=Homo sapiens GN=HIST1H4A PE=1 SV=2	11.367	2.373e-12	1		0.480162	-0.318612	0.900134	0.0456929	38.8	4	4	0.25293	51.559	3	4361700	3365500	996170	21.4	2	2	0.19433	118.76	2	5719100	4703600	1015400	19.4	2	2	0.961908	19.247	2	2791400	1236300	1555100	29.1	3	3	1.12429	146.05	10	14887000	4798300	10089000
	623	P63151;P63151-2;F5GXJ6;E5RFR9;Q00005-6;Q00005;Q00005-2;Q00005-3;Q66LE6;Q00005-4;Q00005-5;Q00005-7	PPP2R2A;PPP2R2D;PPP2R2B	Serine/threonine-protein phosphatase 2A 55 kDa regulatory subunit B alpha isoform;Serine/threonine-protein phosphatase 2A 55 kDa regulatory subunit B beta isoform;Serine/threonine-protein phosphatase 2A 55 kDa regulatory subunit B delta isoform	>sp|P63151|2ABA_HUMAN Serine/threonine-protein phosphatase 2A 55 kDa regulatory subunit B alpha isoform OS=Homo sapiens GN=PPP2R2A PE=1 SV=1;>sp|P63151-2|2ABA_HUMAN Isoform 2 of Serine/threonine-protein phosphatase 2A 55 kDa regulatory subunit B alpha isof	51.691	3.6596e-09	12		0.618868	-0.208402	0.90081	0.0453668	5.8	2	2	1.0047	22.735	2	382820	177410	205410	0	0	0			0	0	0	0	5.8	2	2	0.557258	29.509	2	220850	69181	151670	2.7	1	1	0.423352	NaN	1	291190	93467	197720
	428	P08670;B0YJC4;B0YJC5;Q5JVS8;P17661;H7C5W5;P41219;P41219-2;Q16352;P07197-2;E7EMV2;E7ESP9;P07197;F8W835	VIM	Vimentin	>sp|P08670|VIME_HUMAN Vimentin OS=Homo sapiens GN=VIM PE=1 SV=4;>tr|B0YJC4|B0YJC4_HUMAN Vimentin OS=Homo sapiens GN=VIM PE=1 SV=1	53.651	8.1672e-238	14		0.785664	-0.104763	0.90141	0.0450777	60.1	28	27	0.61597	39.301	32	27505000	16842000	10662000	57.9	23	21	0.60039	29.017	25	21792000	13169000	8622800	50	22	21	1.03162	9.4555	25	19668000	9822200	9845800	52.1	22	21	0.998702	11.92	23	28320000	13903000	14417000
	631	P78371;P78371-2;F5GWF6;F8VQ14	CCT2	T-complex protein 1 subunit beta	>sp|P78371|TCPB_HUMAN T-complex protein 1 subunit beta OS=Homo sapiens GN=CCT2 PE=1 SV=4;>sp|P78371-2|TCPB_HUMAN Isoform 2 of T-complex protein 1 subunit beta OS=Homo sapiens GN=CCT2;>tr|F5GWF6|F5GWF6_HUMAN T-complex protein 1 subunit beta OS=Homo sapiens	57.488	1.0865e-260	4		0.966929	-0.0146054	0.902914	0.0443535	52	19	19	0.99094	16.319	21	18587000	9022600	9564800	50.3	19	19	0.99098	30.934	21	21517000	10373000	11144000	50.1	19	19	0.956206	15.353	23	11539000	5551700	5987600	45	17	17	0.930925	16.57	19	20065000	9686600	10379000
	171	E9PPR1;E9PL12;E9PQ49;E9PI39;E9PK01;P29692;E9PMW7;P29692-2;E9PRY8;E9PIZ1;E9PL71;H0YCK7;P29692-3;E9PN91;E9PK06;P29692-4;E9PK72;E9PQZ1;E9PKK3;E9PNW6;E9PJD0	EEF1D	Elongation factor 1-delta	>tr|E9PPR1|E9PPR1_HUMAN Elongation factor 1-delta (Fragment) OS=Homo sapiens GN=EEF1D PE=1 SV=1;>tr|E9PL12|E9PL12_HUMAN Elongation factor 1-delta (Fragment) OS=Homo sapiens GN=EEF1D PE=1 SV=1;>tr|E9PQ49|E9PQ49_HUMAN Elongation factor 1-delta (Fragment) OS=	18.157	3.9105e-29	21		0.704829	-0.151916	0.905196	0.0432574	28.9	4	4	0.48779	69.368	4	2973800	1913900	1059900	0	0	0			0	0	0	0	42.2	5	5	0.85859	71.439	6	3158500	1366900	1791600	34.9	5	5	0.83605	100.77	5	4489400	2108800	2380600
	470	P17987;E7ERF2;E7EQR6;F5H282;F5H136;F5GZ03;F5H676;F5H726;F5GZI8;F5H7Y1;F5GYL4	TCP1	T-complex protein 1 subunit alpha	>sp|P17987|TCPA_HUMAN T-complex protein 1 subunit alpha OS=Homo sapiens GN=TCP1 PE=1 SV=1;>tr|E7ERF2|E7ERF2_HUMAN T-complex protein 1 subunit alpha OS=Homo sapiens GN=TCP1 PE=1 SV=1;>tr|E7EQR6|E7EQR6_HUMAN T-complex protein 1 subunit alpha OS=Homo sapiens	60.343	9.0982e-257	11		0.96322	-0.0162746	0.909155	0.0413621	47.1	22	22	1.0066	31.831	29	25582000	12672000	12910000	47.1	22	22	0.98858	22.209	28	33448000	16172000	17276000	49.6	23	23	0.934842	12.139	27	21243000	10298000	10944000	44.6	21	21	0.925326	16.304	30	46325000	22353000	23972000
	434	P16403;P10412;P16402;P22492;Q02539	HIST1H1C;HIST1H1E;HIST1H1D	Histone H1.2;Histone H1.4;Histone H1.3	>sp|P16403|H12_HUMAN Histone H1.2 OS=Homo sapiens GN=HIST1H1C PE=1 SV=2;>sp|P10412|H14_HUMAN Histone H1.4 OS=Homo sapiens GN=HIST1H1E PE=1 SV=2;>sp|P16402|H13_HUMAN Histone H1.3 OS=Homo sapiens GN=HIST1H1D PE=1 SV=2	21.364	4.6778e-18	5		0.707852	-0.150057	0.914367	0.0388796	10.8	3	3	0.51007	34.064	7	3800000	2339600	1460400	16	3	3	0.5039	34.448	8	6744300	4448500	2295800	9.9	2	2	0.96918	84.91	9	4616500	2167900	2448600	16	6	6	1.00784	81.076	14	15219000	7352600	7866800
	173	E9PMI6;E9PJF4;J3KN38;P54105;E9PQ83	CLNS1A	Methylosome subunit pICln	>tr|E9PMI6|E9PMI6_HUMAN Methylosome subunit pICln OS=Homo sapiens GN=CLNS1A PE=1 SV=1;>tr|E9PJF4|E9PJF4_HUMAN Methylosome subunit pICln OS=Homo sapiens GN=CLNS1A PE=1 SV=1;>tr|J3KN38|J3KN38_HUMAN Methylosome subunit pICln OS=Homo sapiens GN=CLNS1A PE=1 SV=	18.259	2.5978e-38	5		0.729901	-0.136736	0.914482	0.0388249	22.8	2	2	0.97357	88.96	3	6855600	3481700	3373800	22.8	2	2	0.99886	33.453	4	3404700	1510000	1894700	40.1	4	4	0.522821	62.069	9	7099700	2520400	4579200	29.9	3	3	0.558254	64.678	4	9954100	3547900	6406200
[truncated: 254 more rows]
