# Supplementary figures and images for: Defining the interactome of the human mitochondrial ribosome identifies SMIM4 and TMEM223 as respiratory chain assembly factors
Source: eLife journal article supplement (doi:10.7554/elife.68213), 2021-12-17

Figure\_2\_source\_data\_4\_Figure\_2E

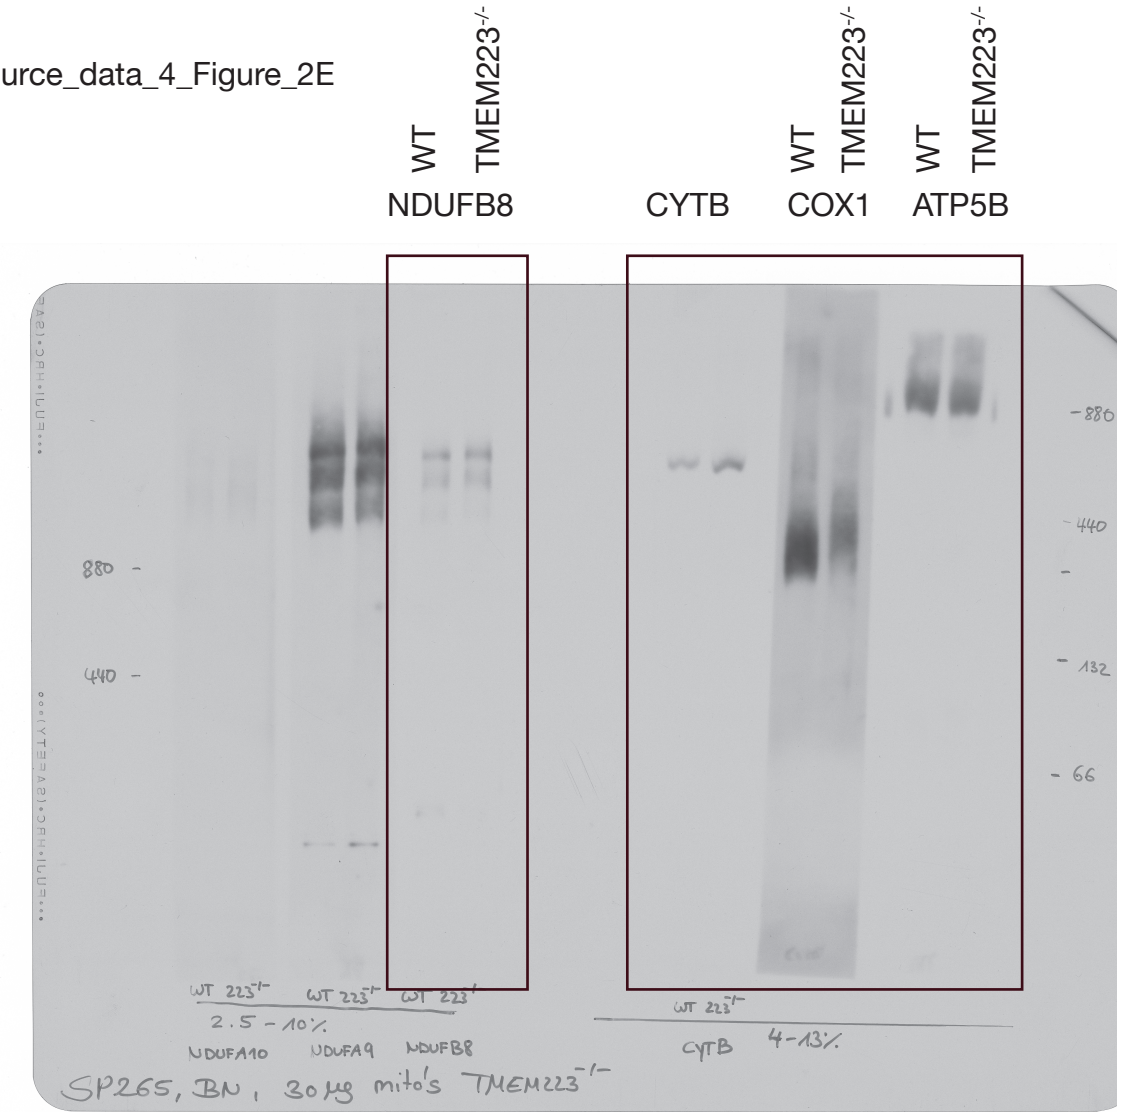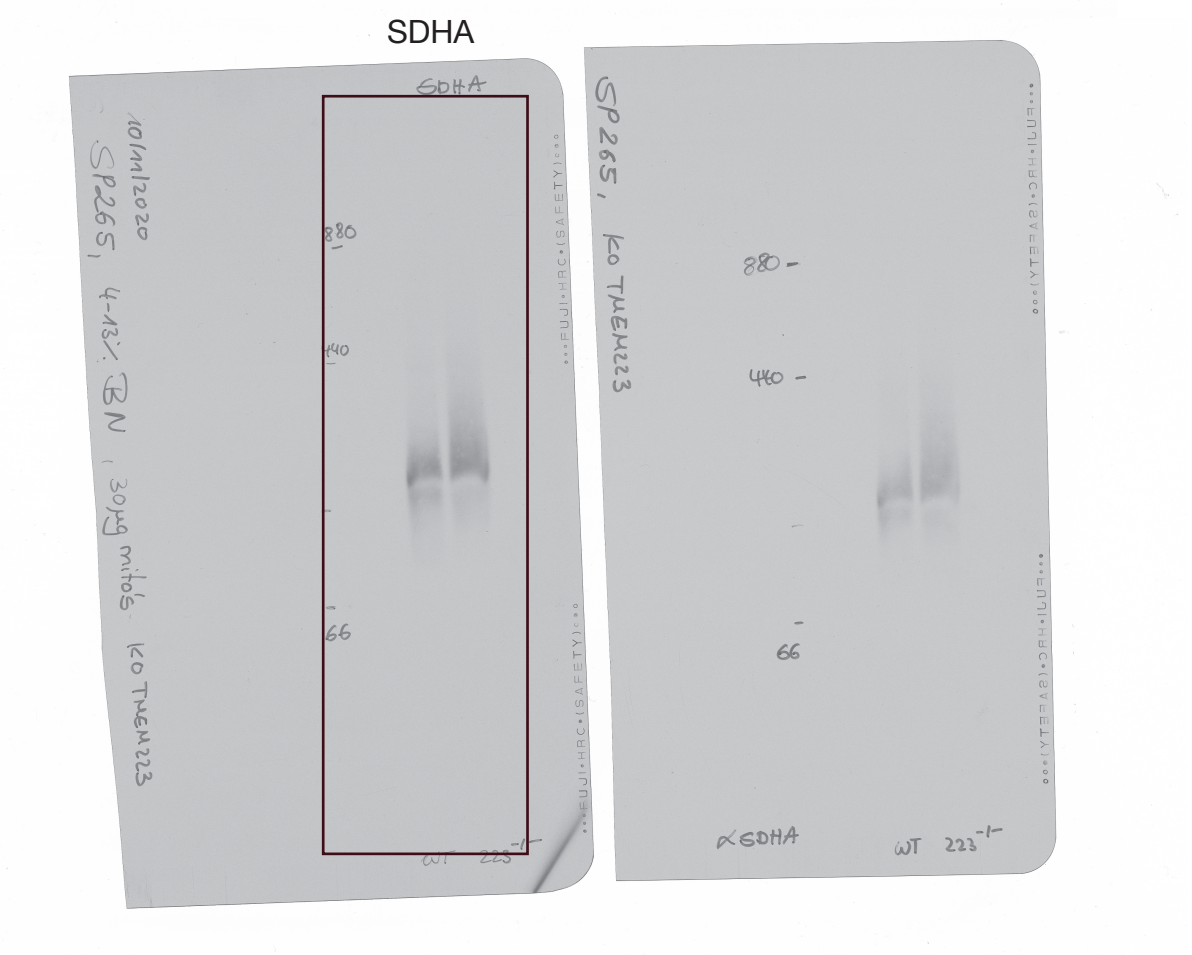

Supplement: fig2-data1 [file elife-68213-fig2-data1-v1.zip]

Figure 2 source data 1 related to Figure 2B

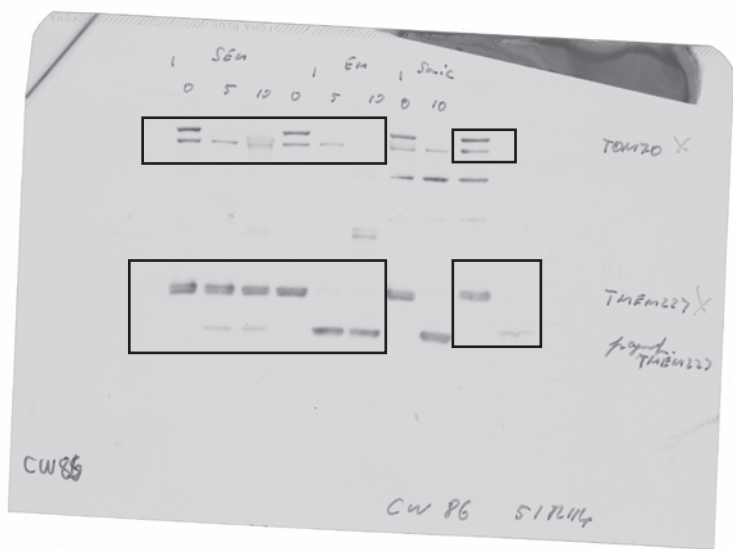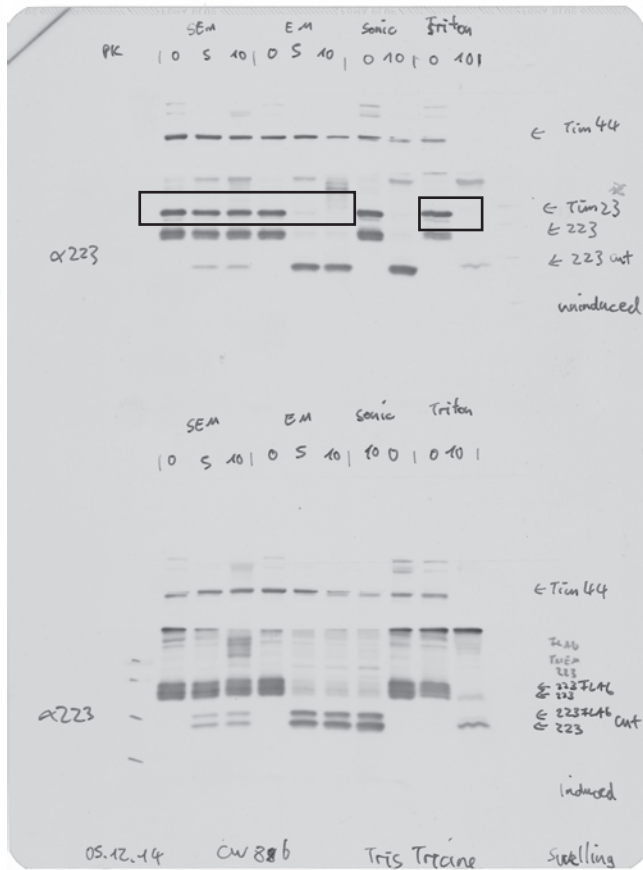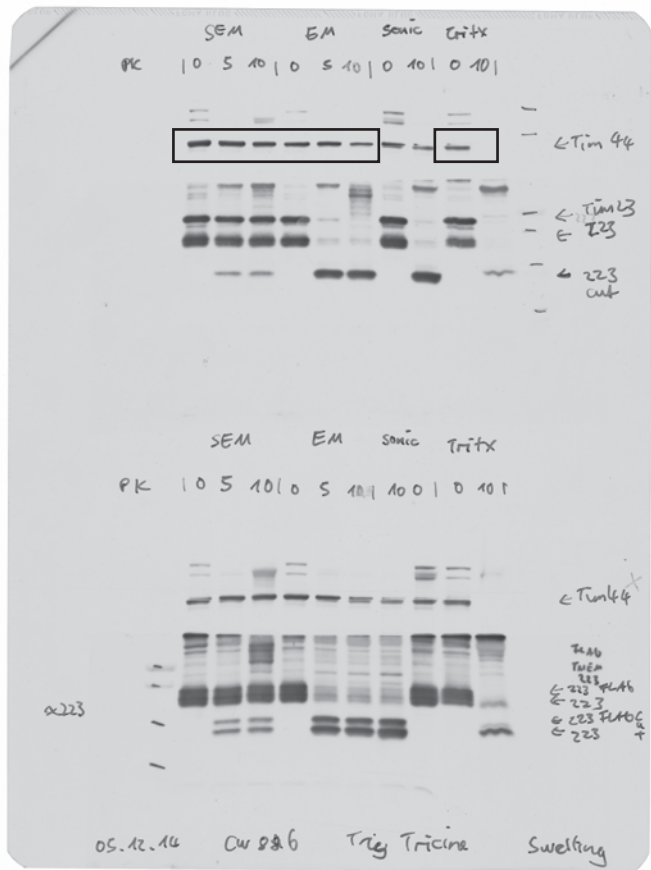

Supplement: fig2-data1 [file elife-68213-fig2-data1-v1.zip]

Figure 2 source data 3 related to Figure 2D

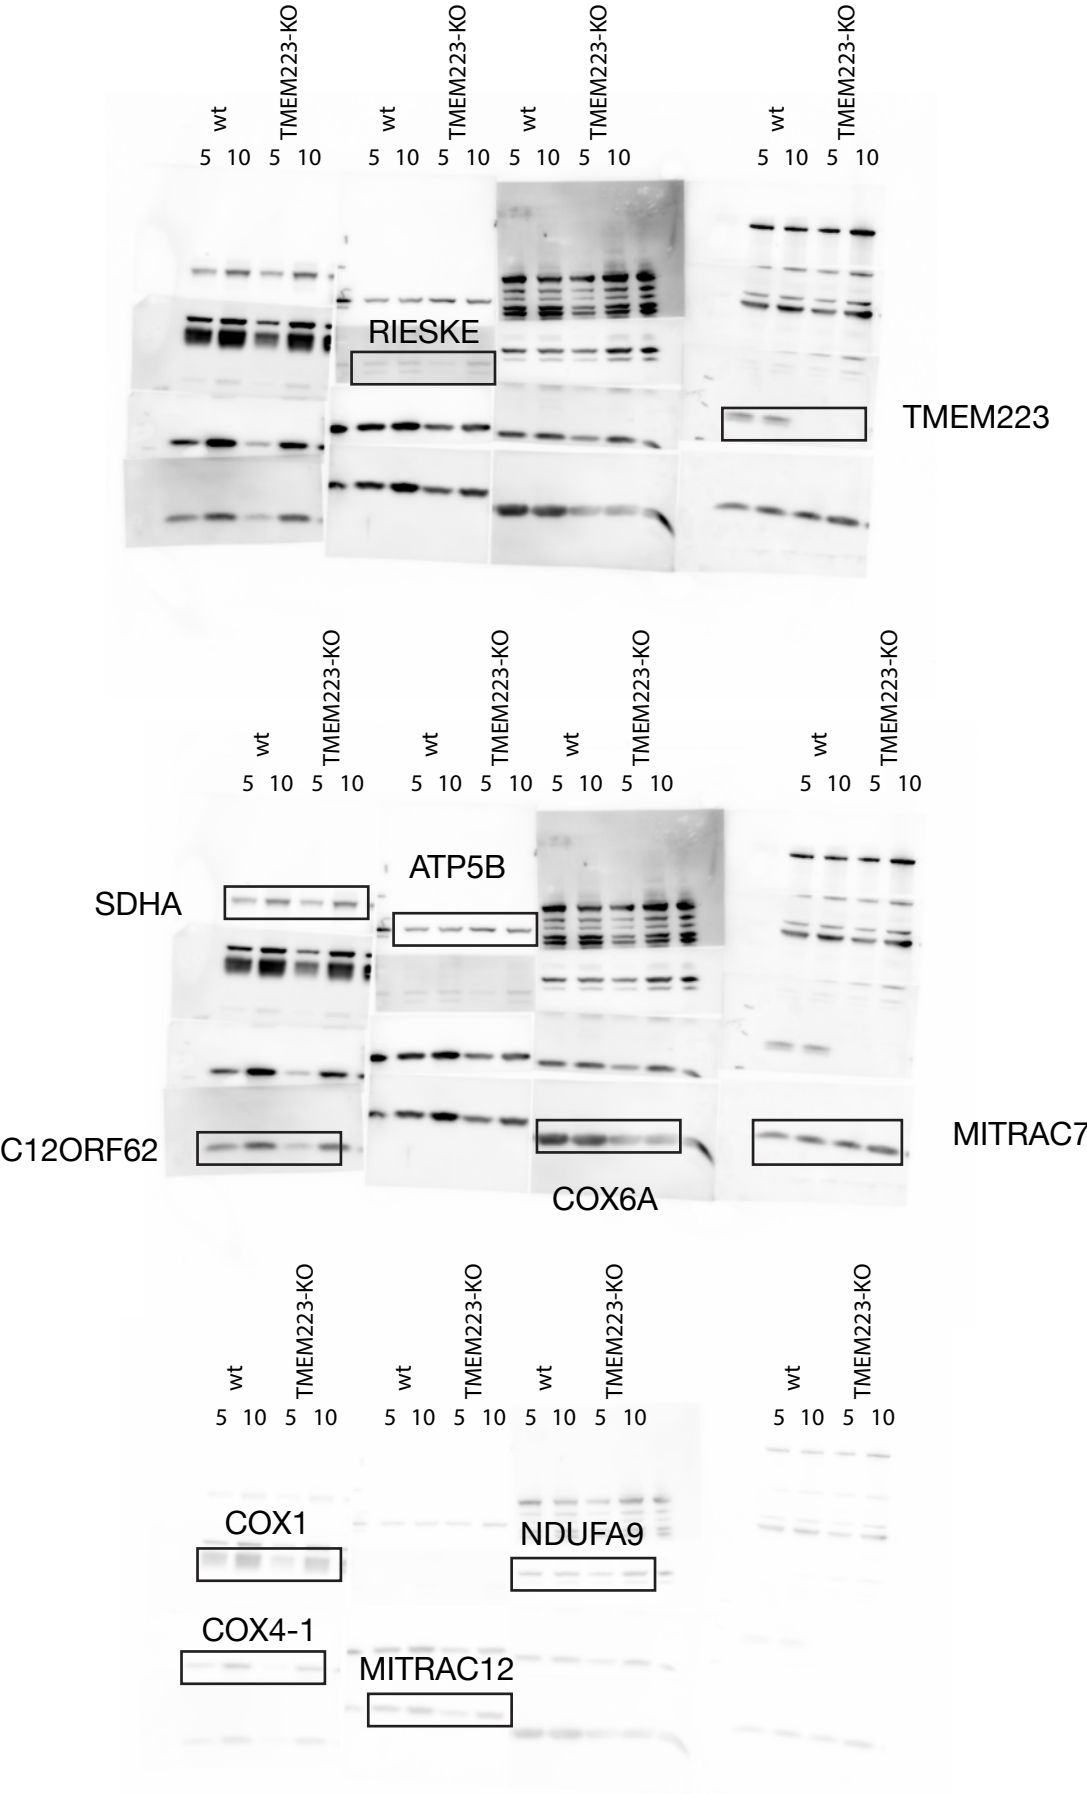

Supplement: fig2-data1 [file elife-68213-fig2-data1-v1.zip]

Figure 2 source data 2 related to Figure 2C

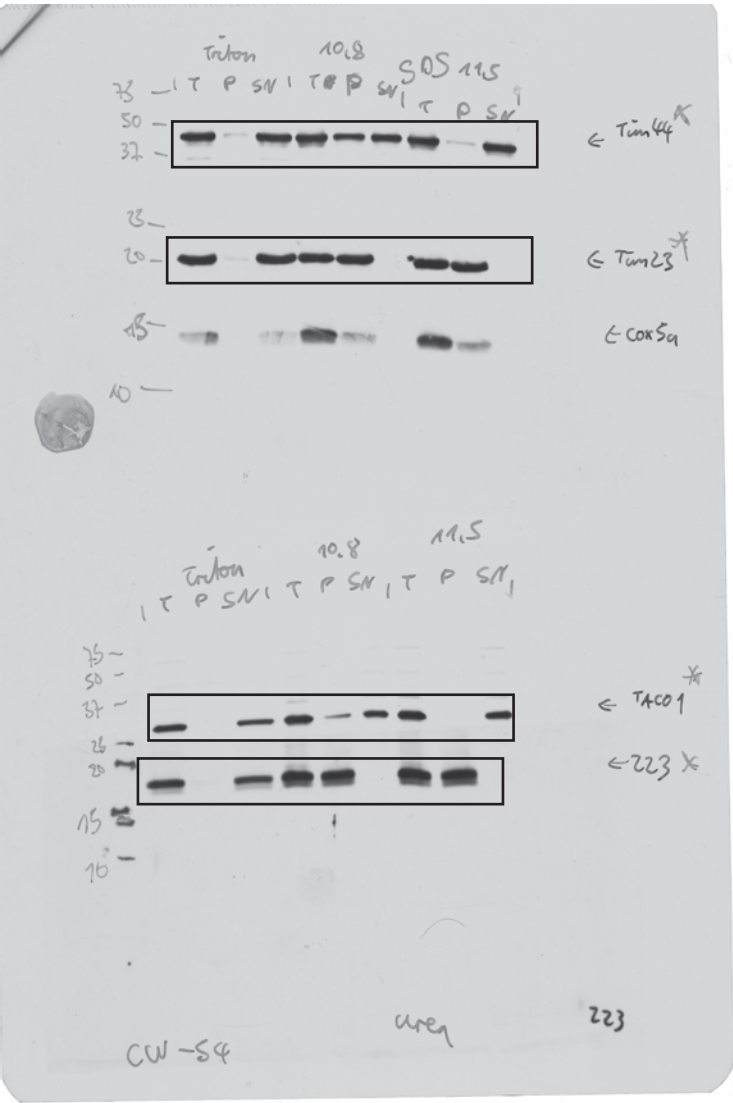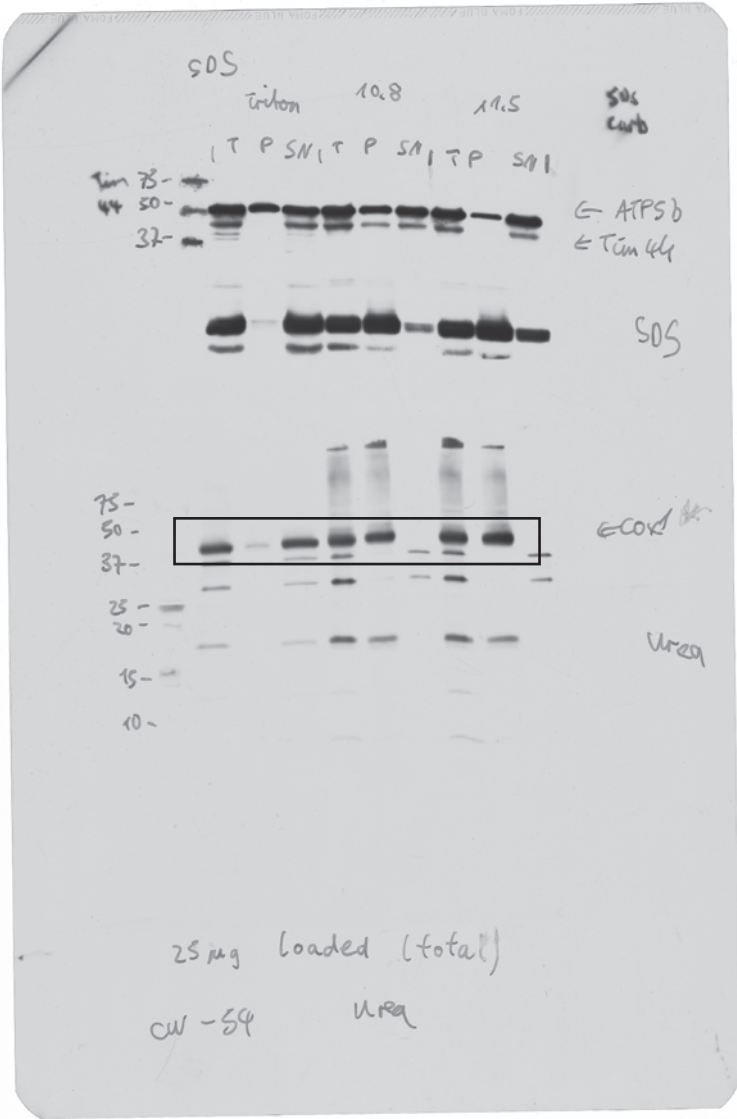

Supplement: fig2-data1 [file elife-68213-fig2-data1-v1.zip]

Figure 2 supplement 1 source data 3 related to Figure 1 supplement 1C

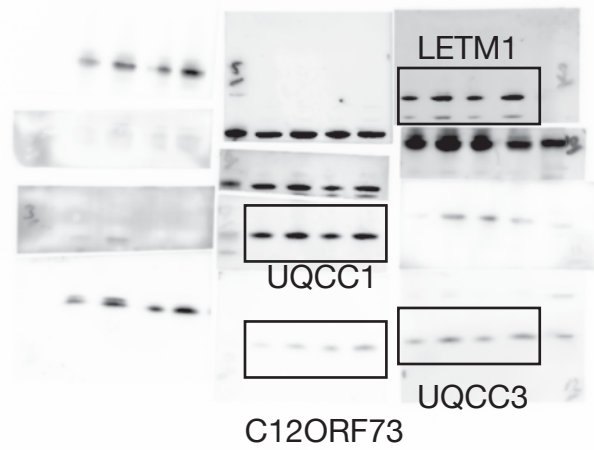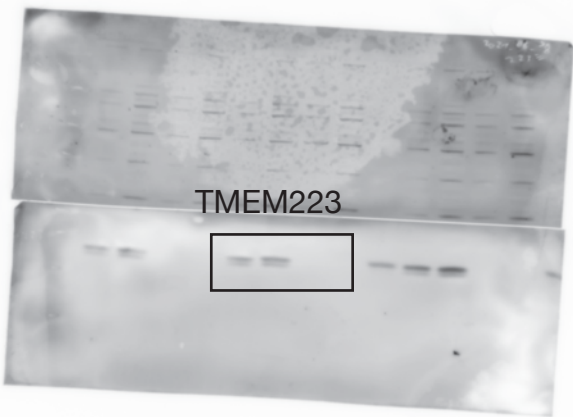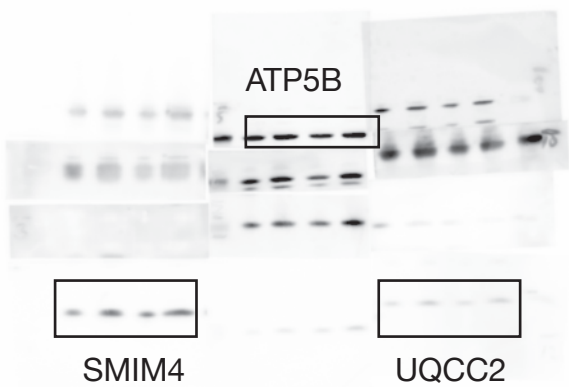

Supplement: fig2-figsupp1-data1 [file elife-68213-fig2-figsupp1-data1-v1.zip]

Figure 2 supplement 1 source data 1 related to Figure 1 supplement 1 A

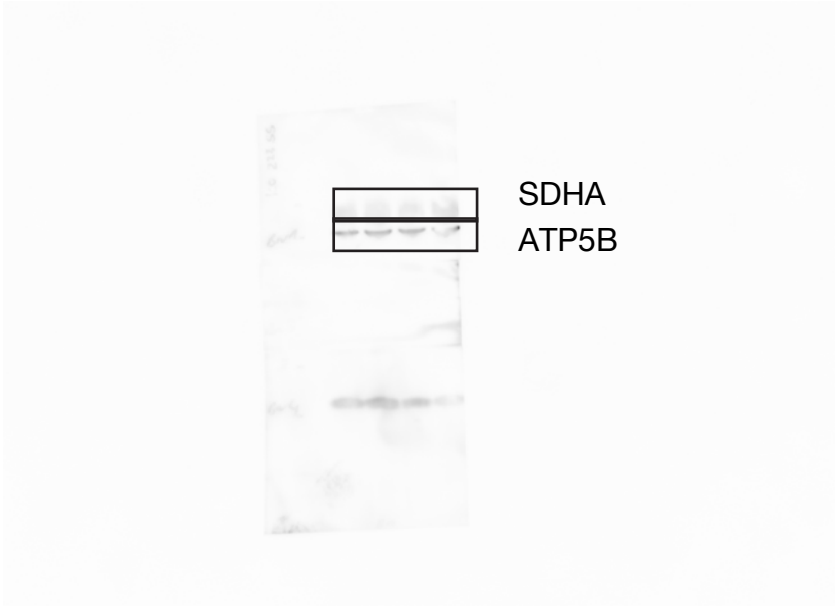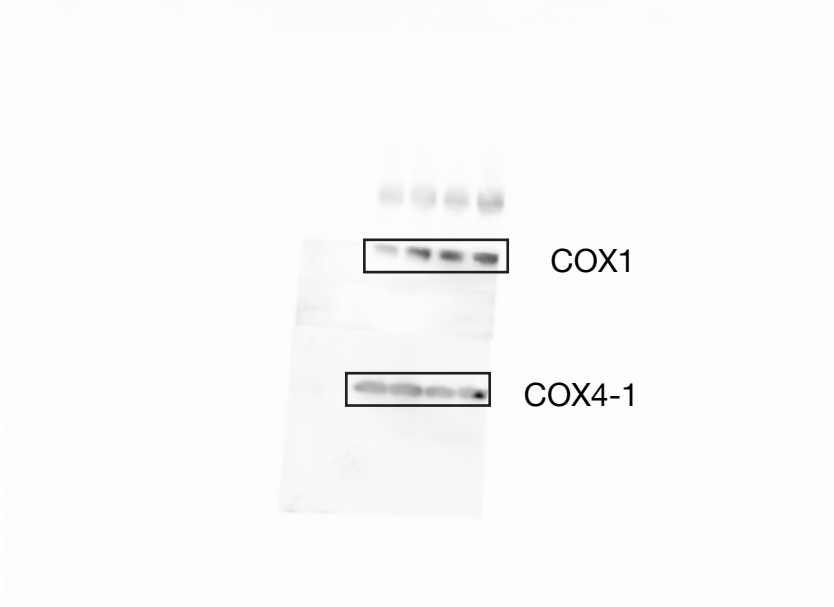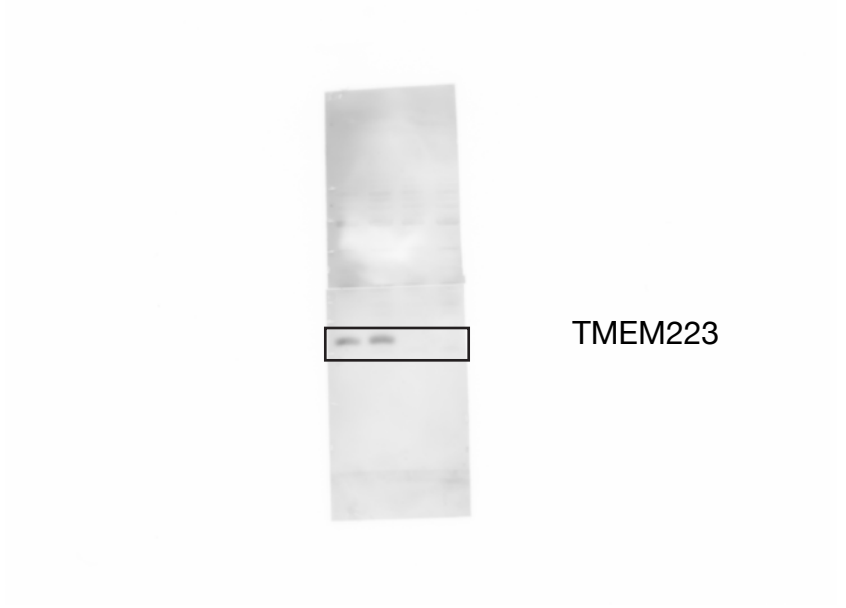

Supplement: fig2-figsupp1-data1 [file elife-68213-fig2-figsupp1-data1-v1.zip]

Figure 2 supplement 1 source data 2 related to Figure 1 supplement 1 B

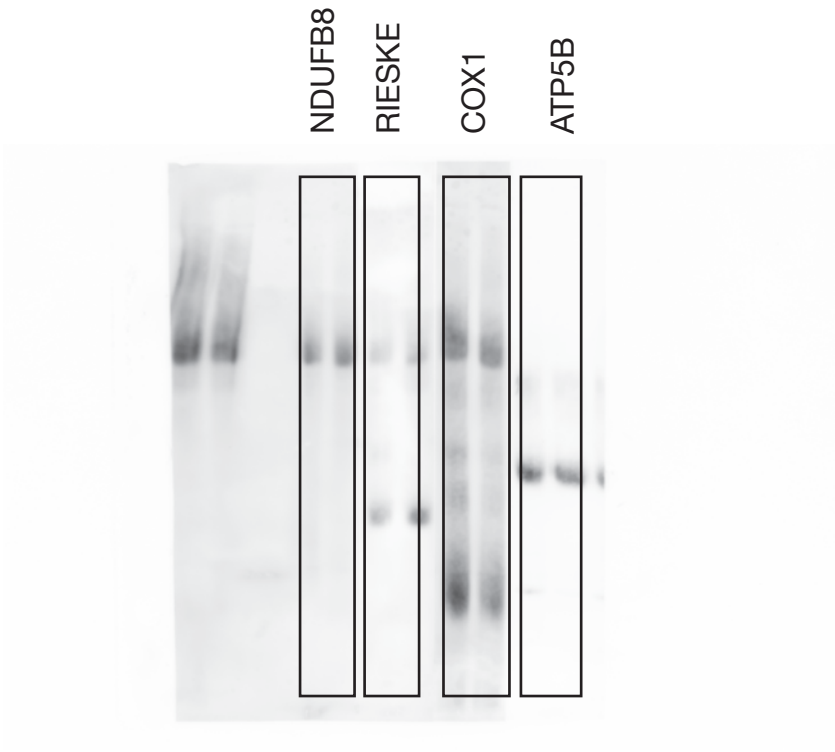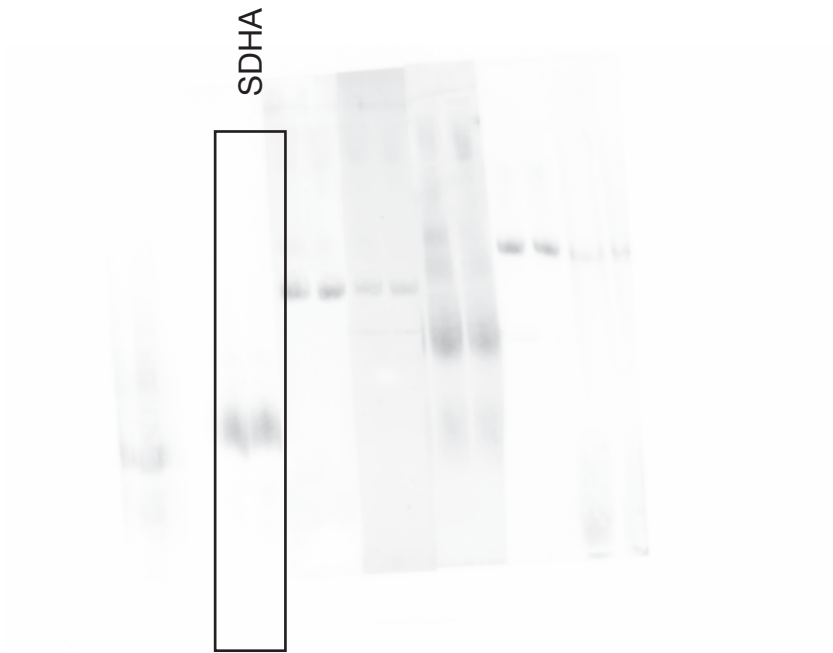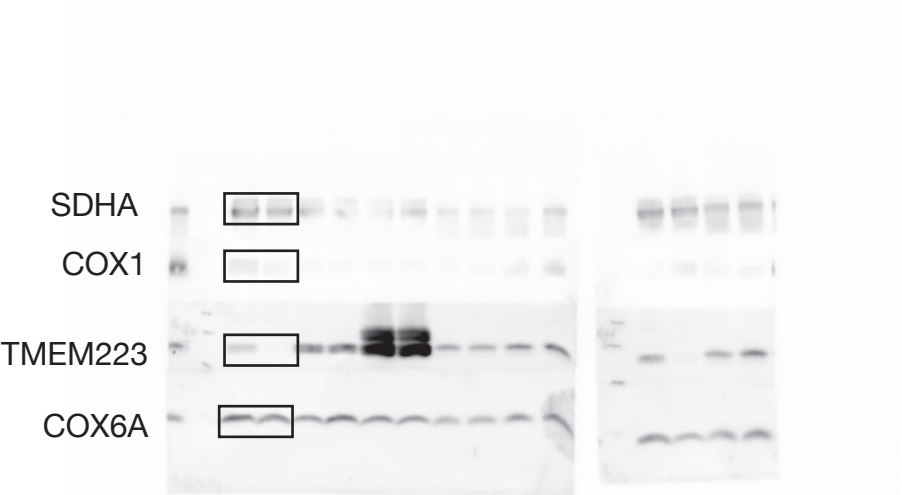

Supplement: fig2-figsupp1-data1 [file elife-68213-fig2-figsupp1-data1-v1.zip]

Figure 3 source data 5 related to Figure 3G

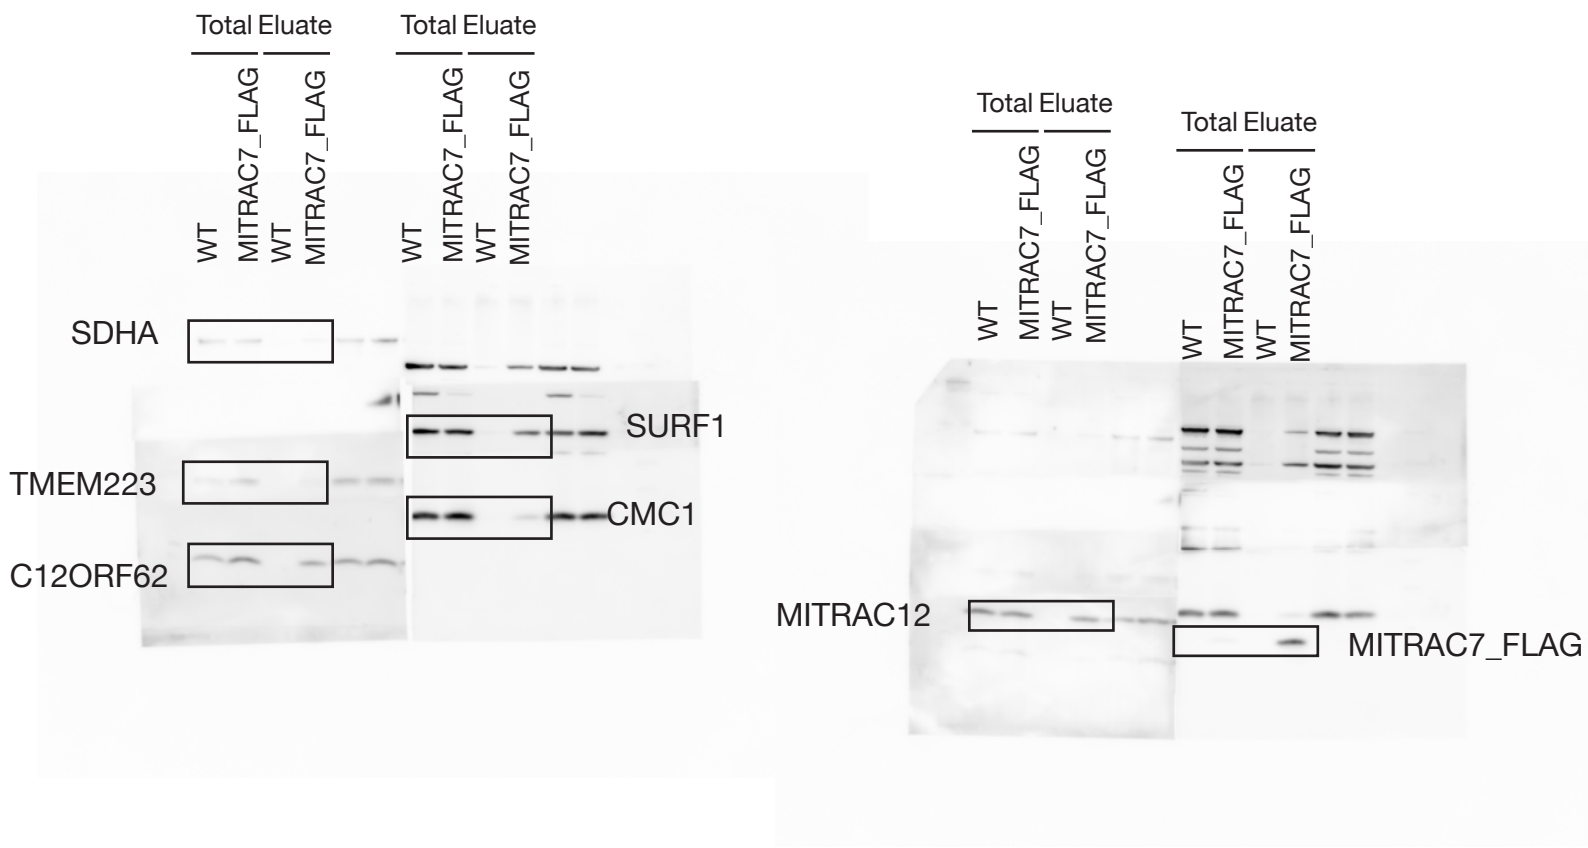

Supplement: fig3-data1 [file elife-68213-fig3-data1-v1.zip]

Figure 3 source data 1 related to Figure 3B

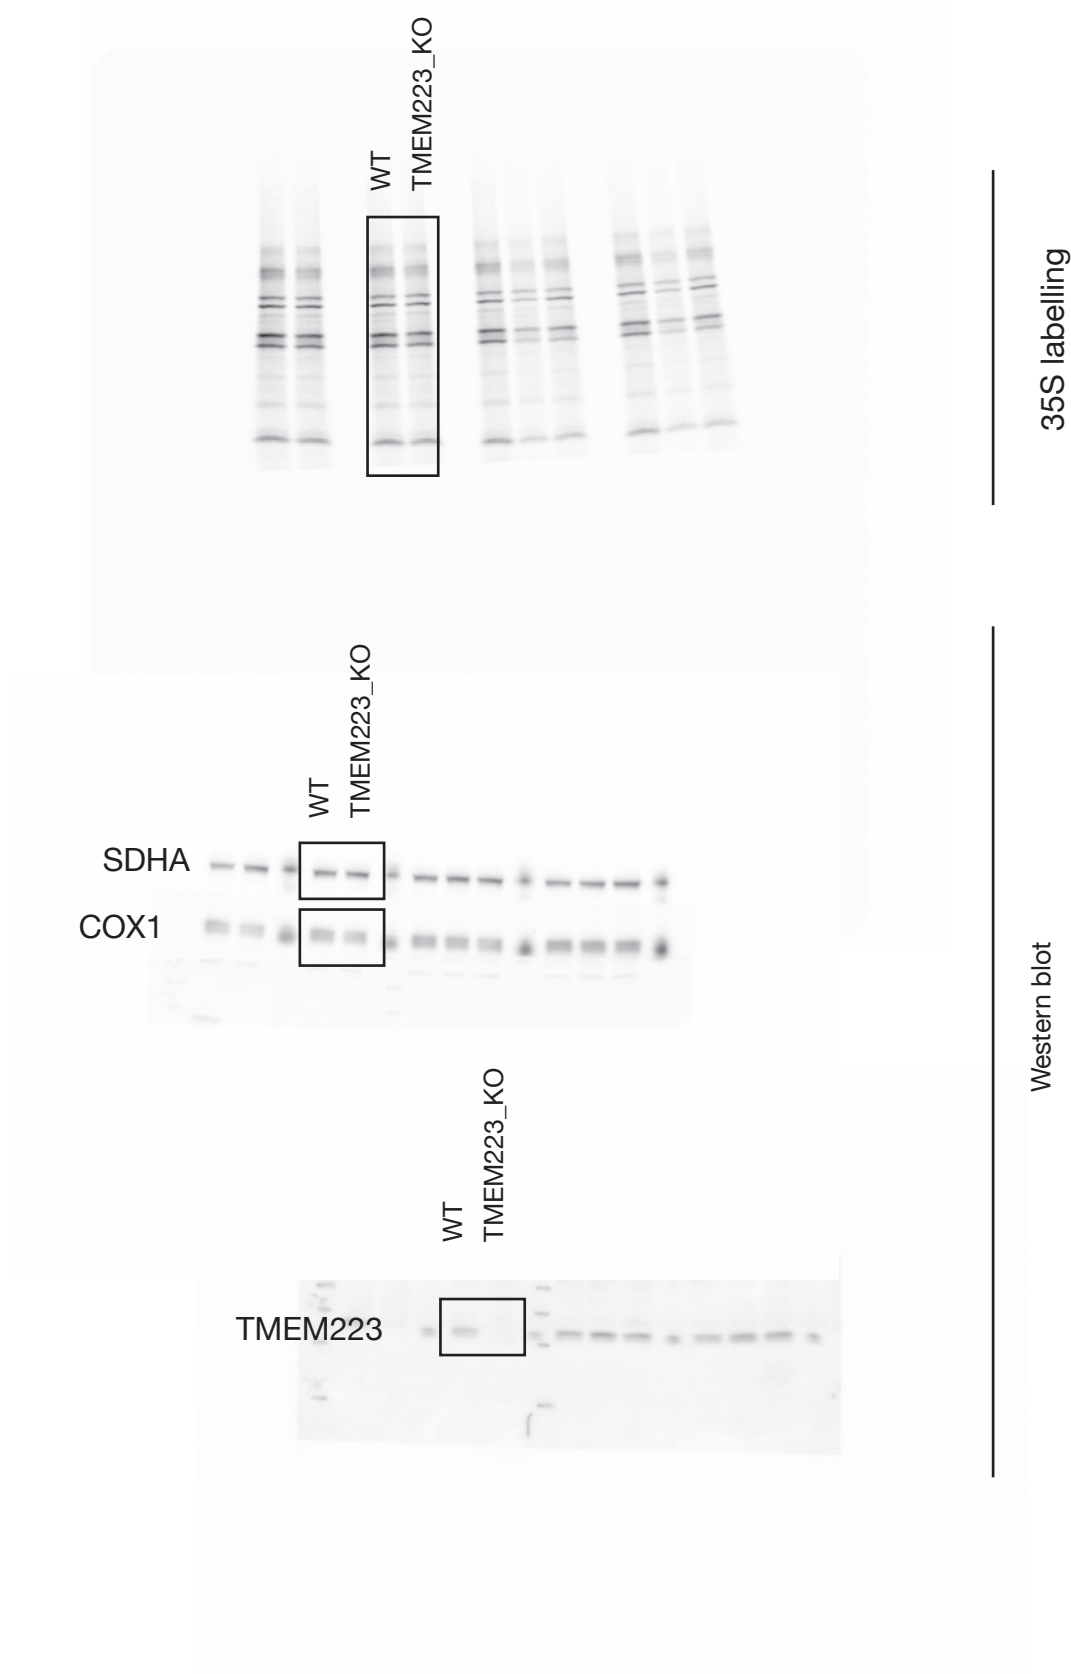

Supplement: fig3-data1 [file elife-68213-fig3-data1-v1.zip]

Figure 3 source data 2 related to Figure 3D

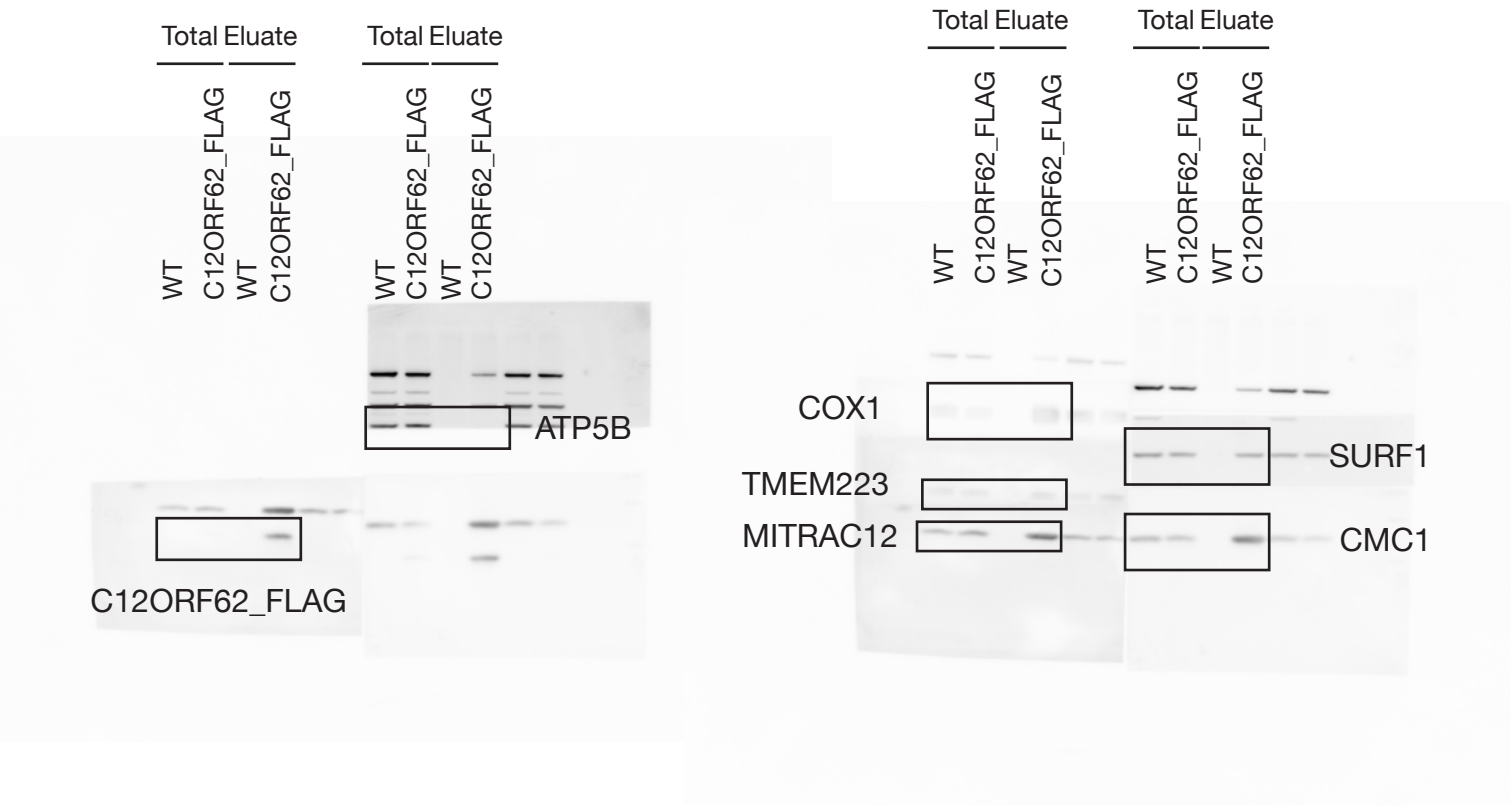

Supplement: fig3-data1 [file elife-68213-fig3-data1-v1.zip]

Figure 3 source data 4 related to Figure 3F

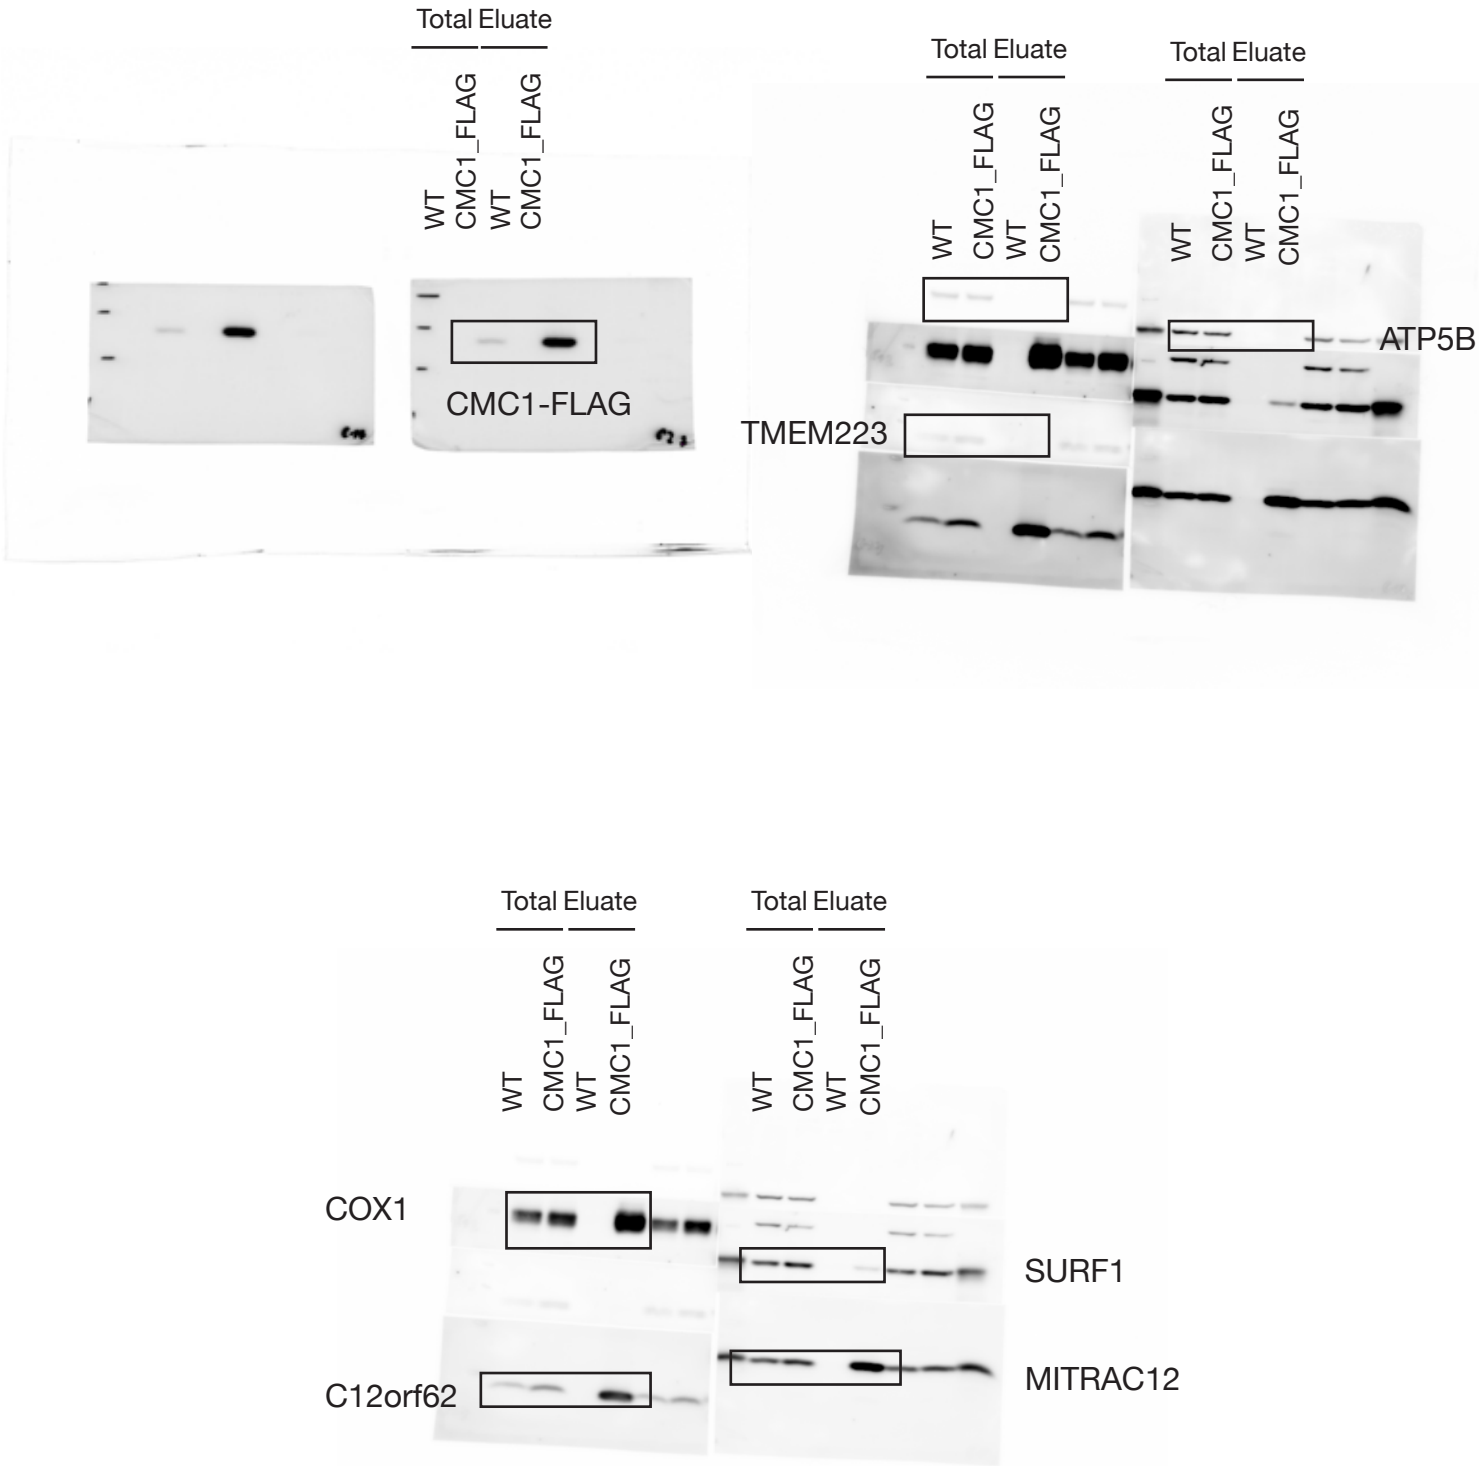

Supplement: fig3-data1 [file elife-68213-fig3-data1-v1.zip]

Figure 3 source data 3 related to Figure 3E

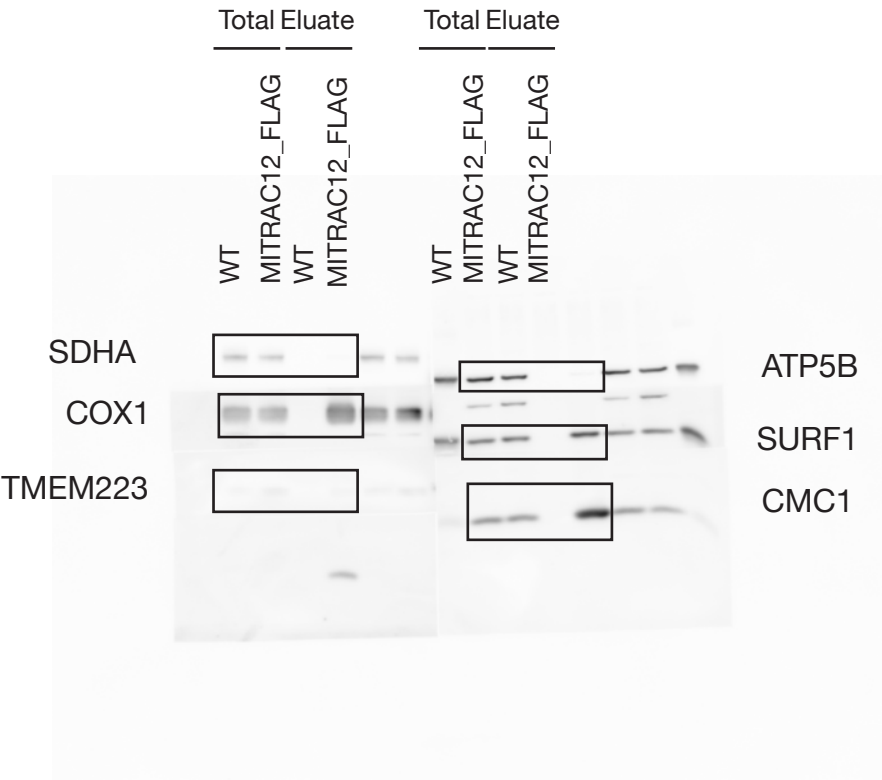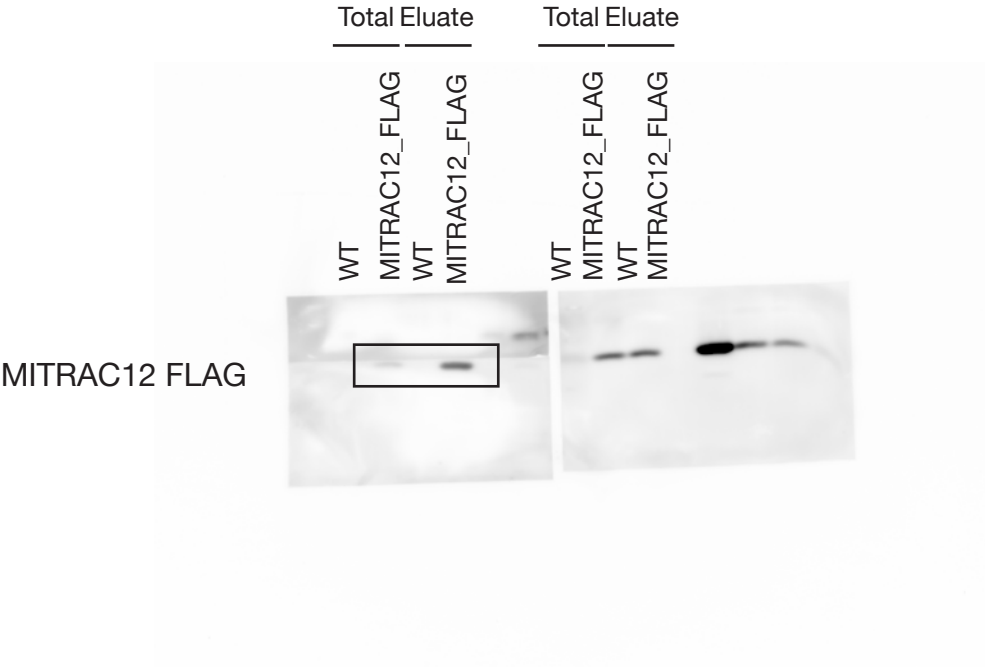

Supplement: fig3-data1 [file elife-68213-fig3-data1-v1.zip]

Figure 4 source data 1 related to Figure 4C

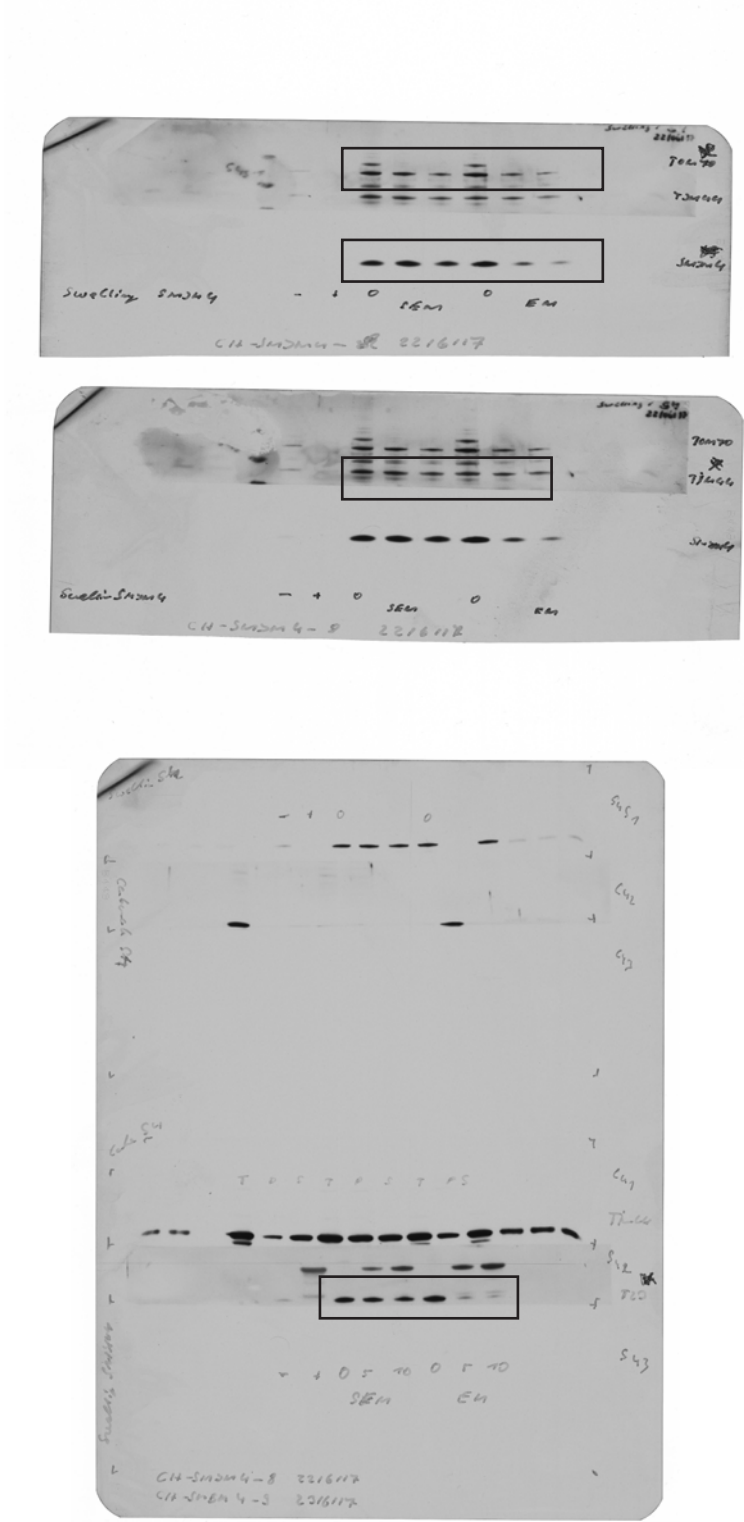

Supplement: fig4-data1 [file Figure_4_source_data_1_Figure_4C.pdf › Figure_4_source_data/Figure_4_source_data_1_Figure_4C/Data_labelled/Figure_4_source_data_1_Figure_4C.pdf]

Figure 4 source data 2 related to Figure 4D

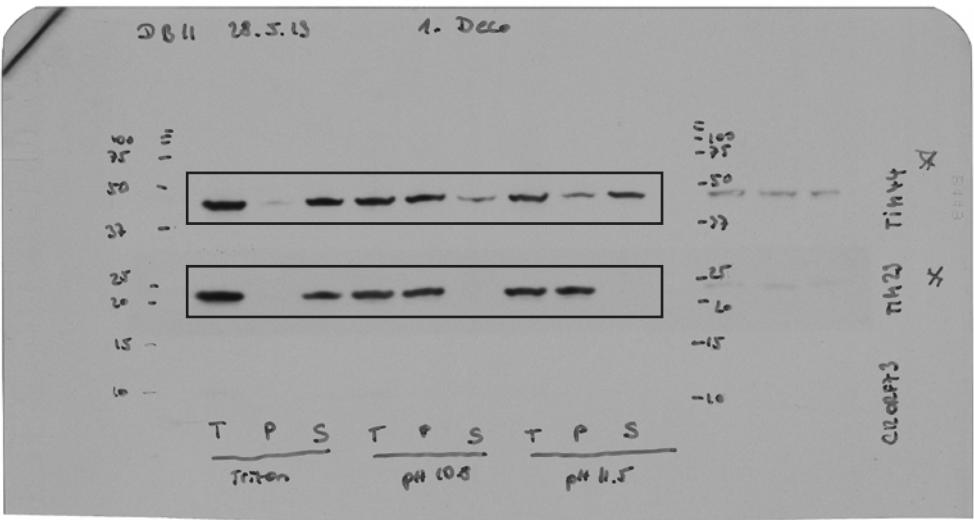

Supplement: fig4-data1 [file Figure_4_source_data_2_Figure_4D.pdf › Figure_4_source_data/Figure_4_source_data_2_Figure_4D/Data_labelled/Figure_4_source_data_2_Figure_4D.pdf]

Figure 4 source data 3 related to Figure 4F

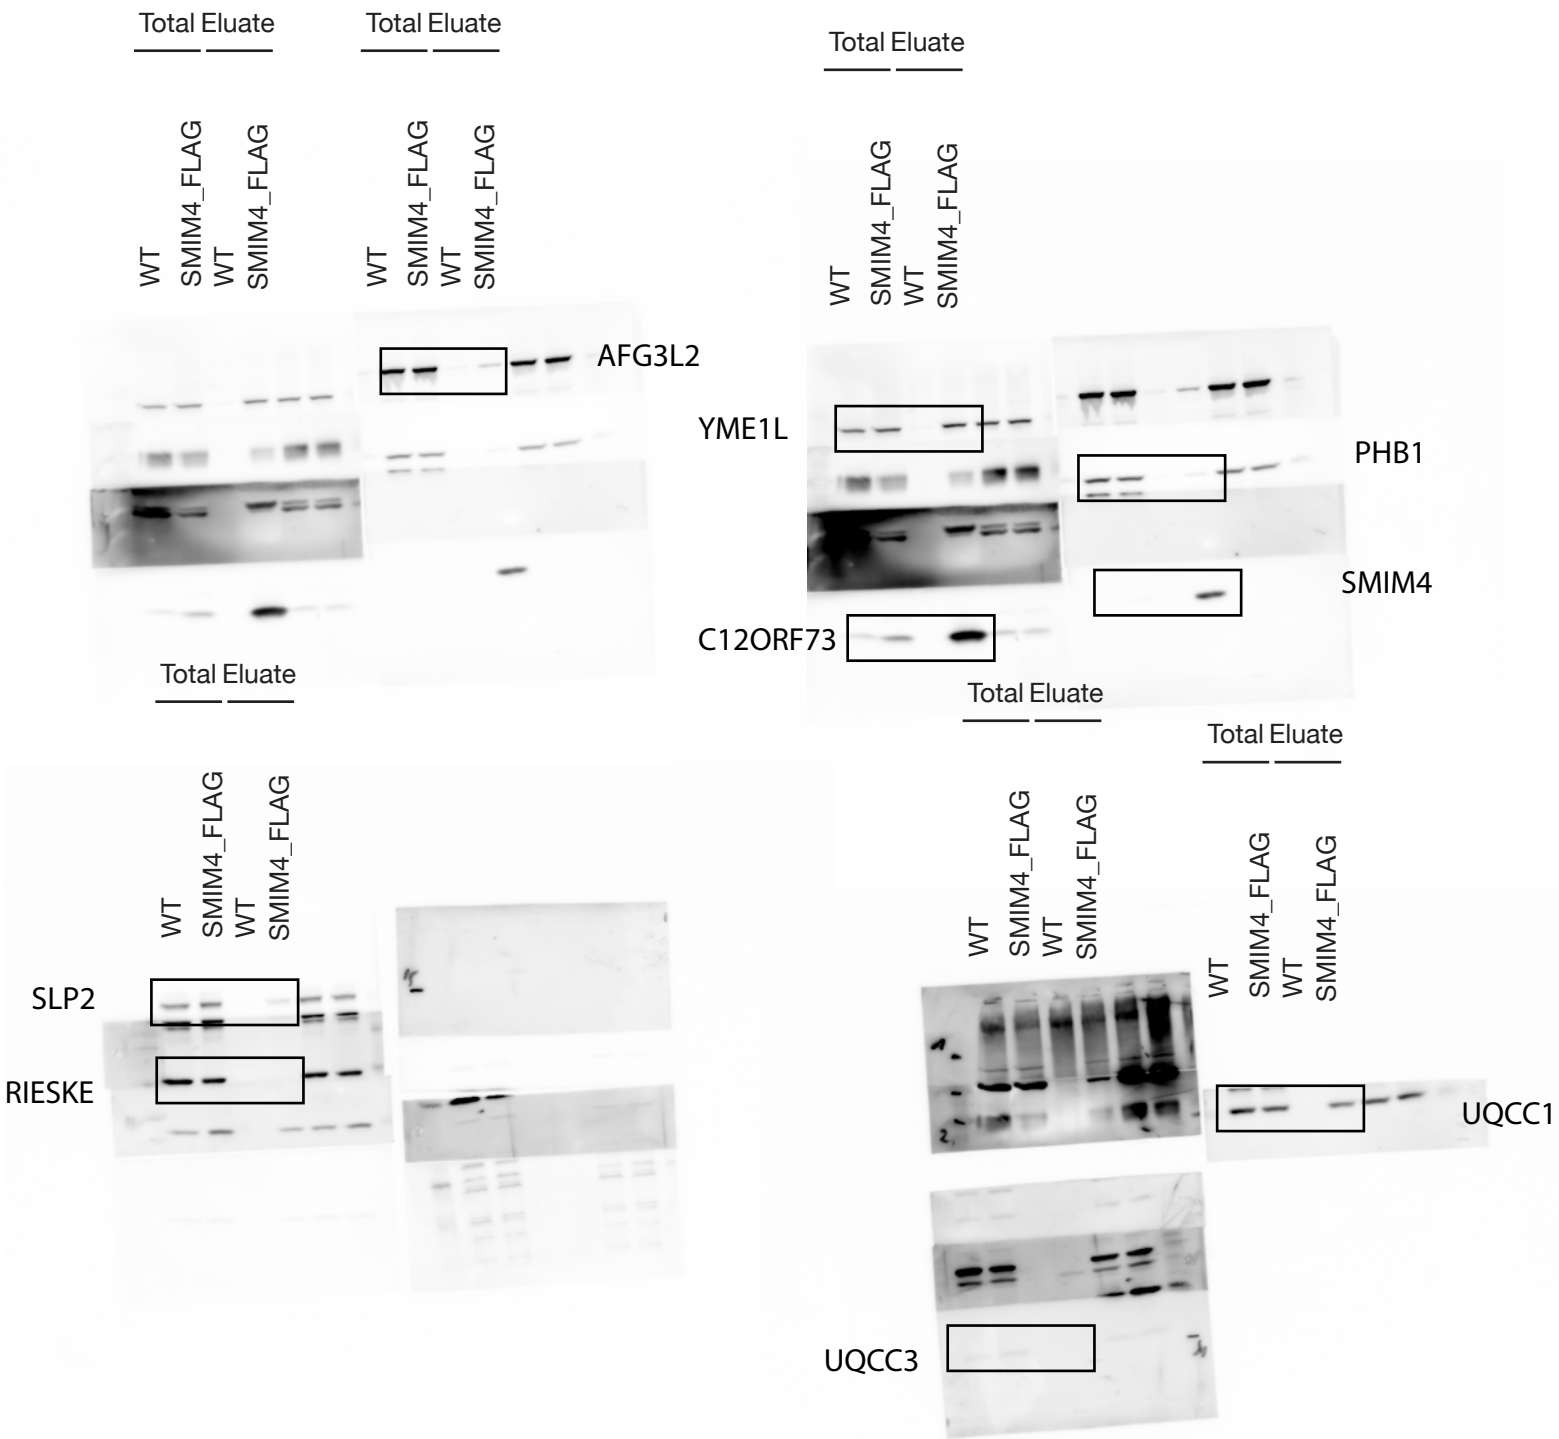

Supplement: fig4-data1 [file Figure_4_source_data_3_Figure_4F.pdf › Figure_4_source_data/Figure_4_source_data_3_Figure_4F/Data_labelled/Figure_4_source_data_3_Figure_4F.pdf]

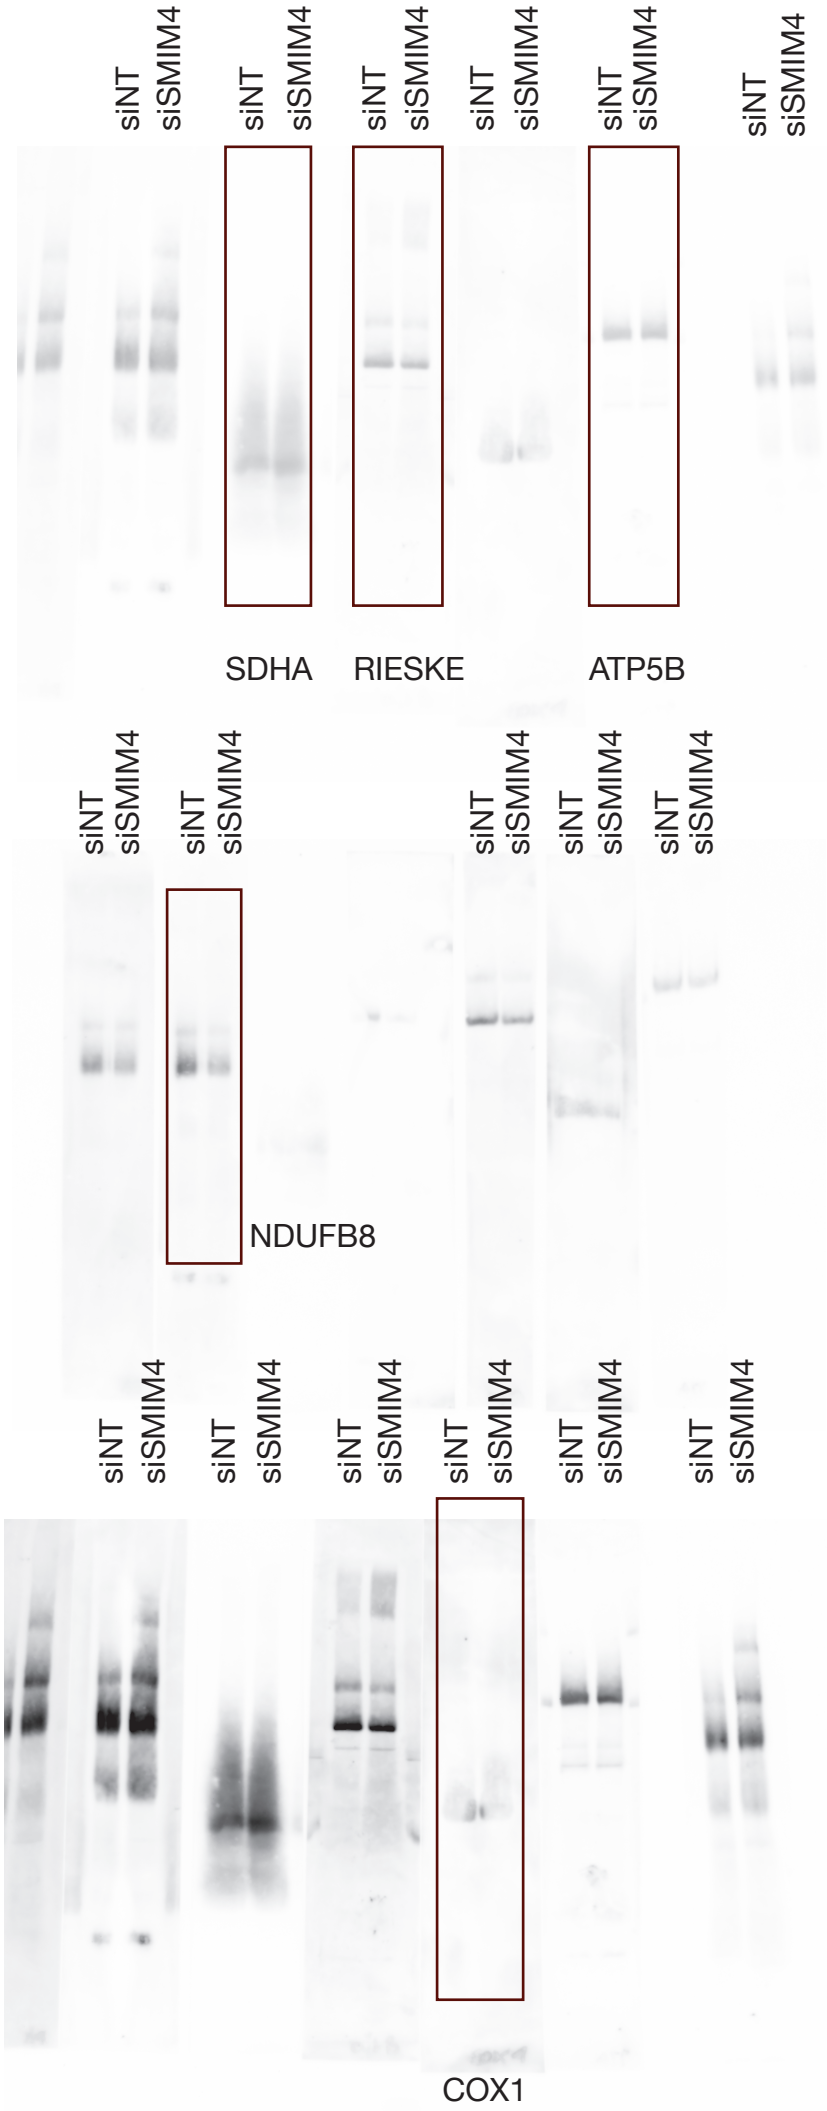

Supplement: fig5-data1 [file elife-68213-fig5-data1-v1.zip]

Figure\_5\_source\_data\_4\_Figure\_5E

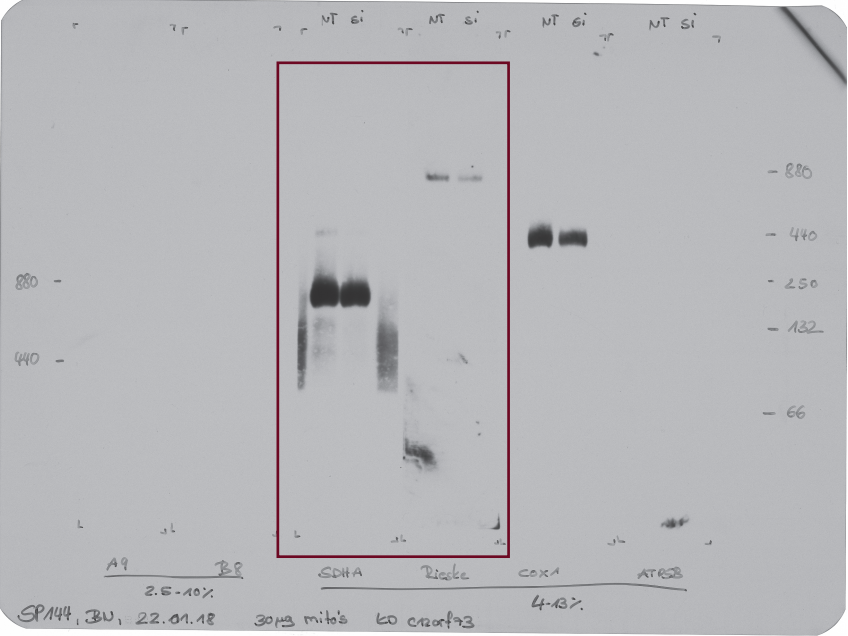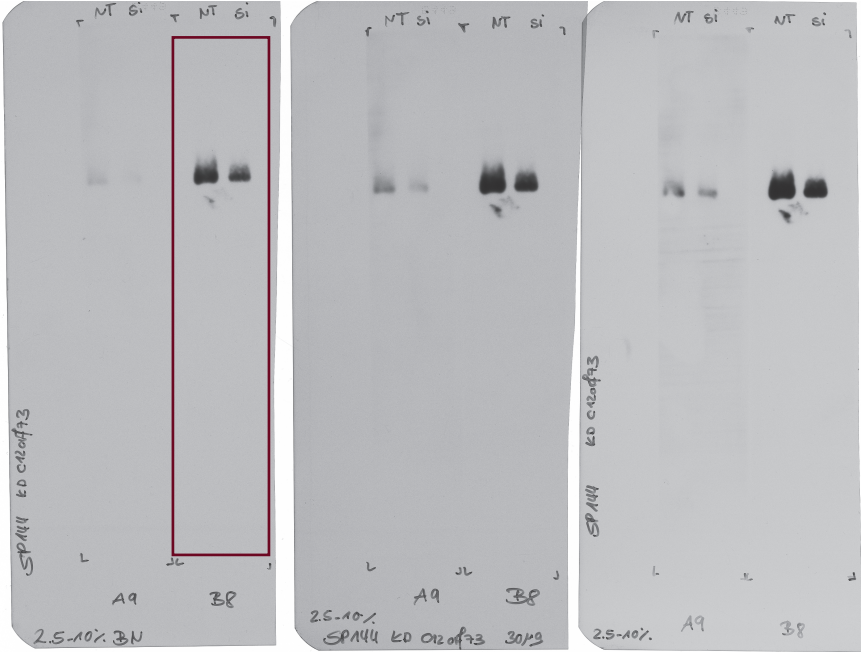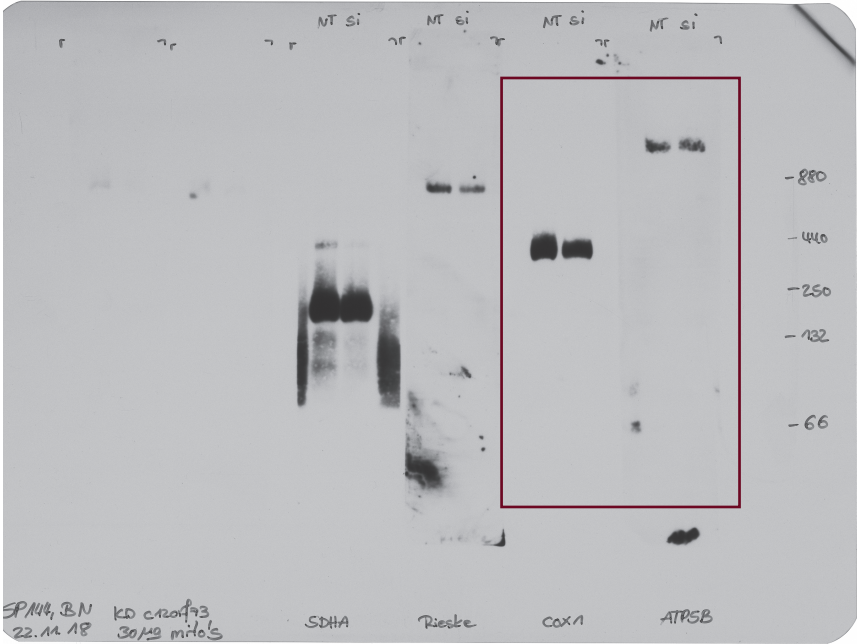

Supplement: fig5-data1 [file elife-68213-fig5-data1-v1.zip]

Figure 5 source data 1 related to Figure 5A

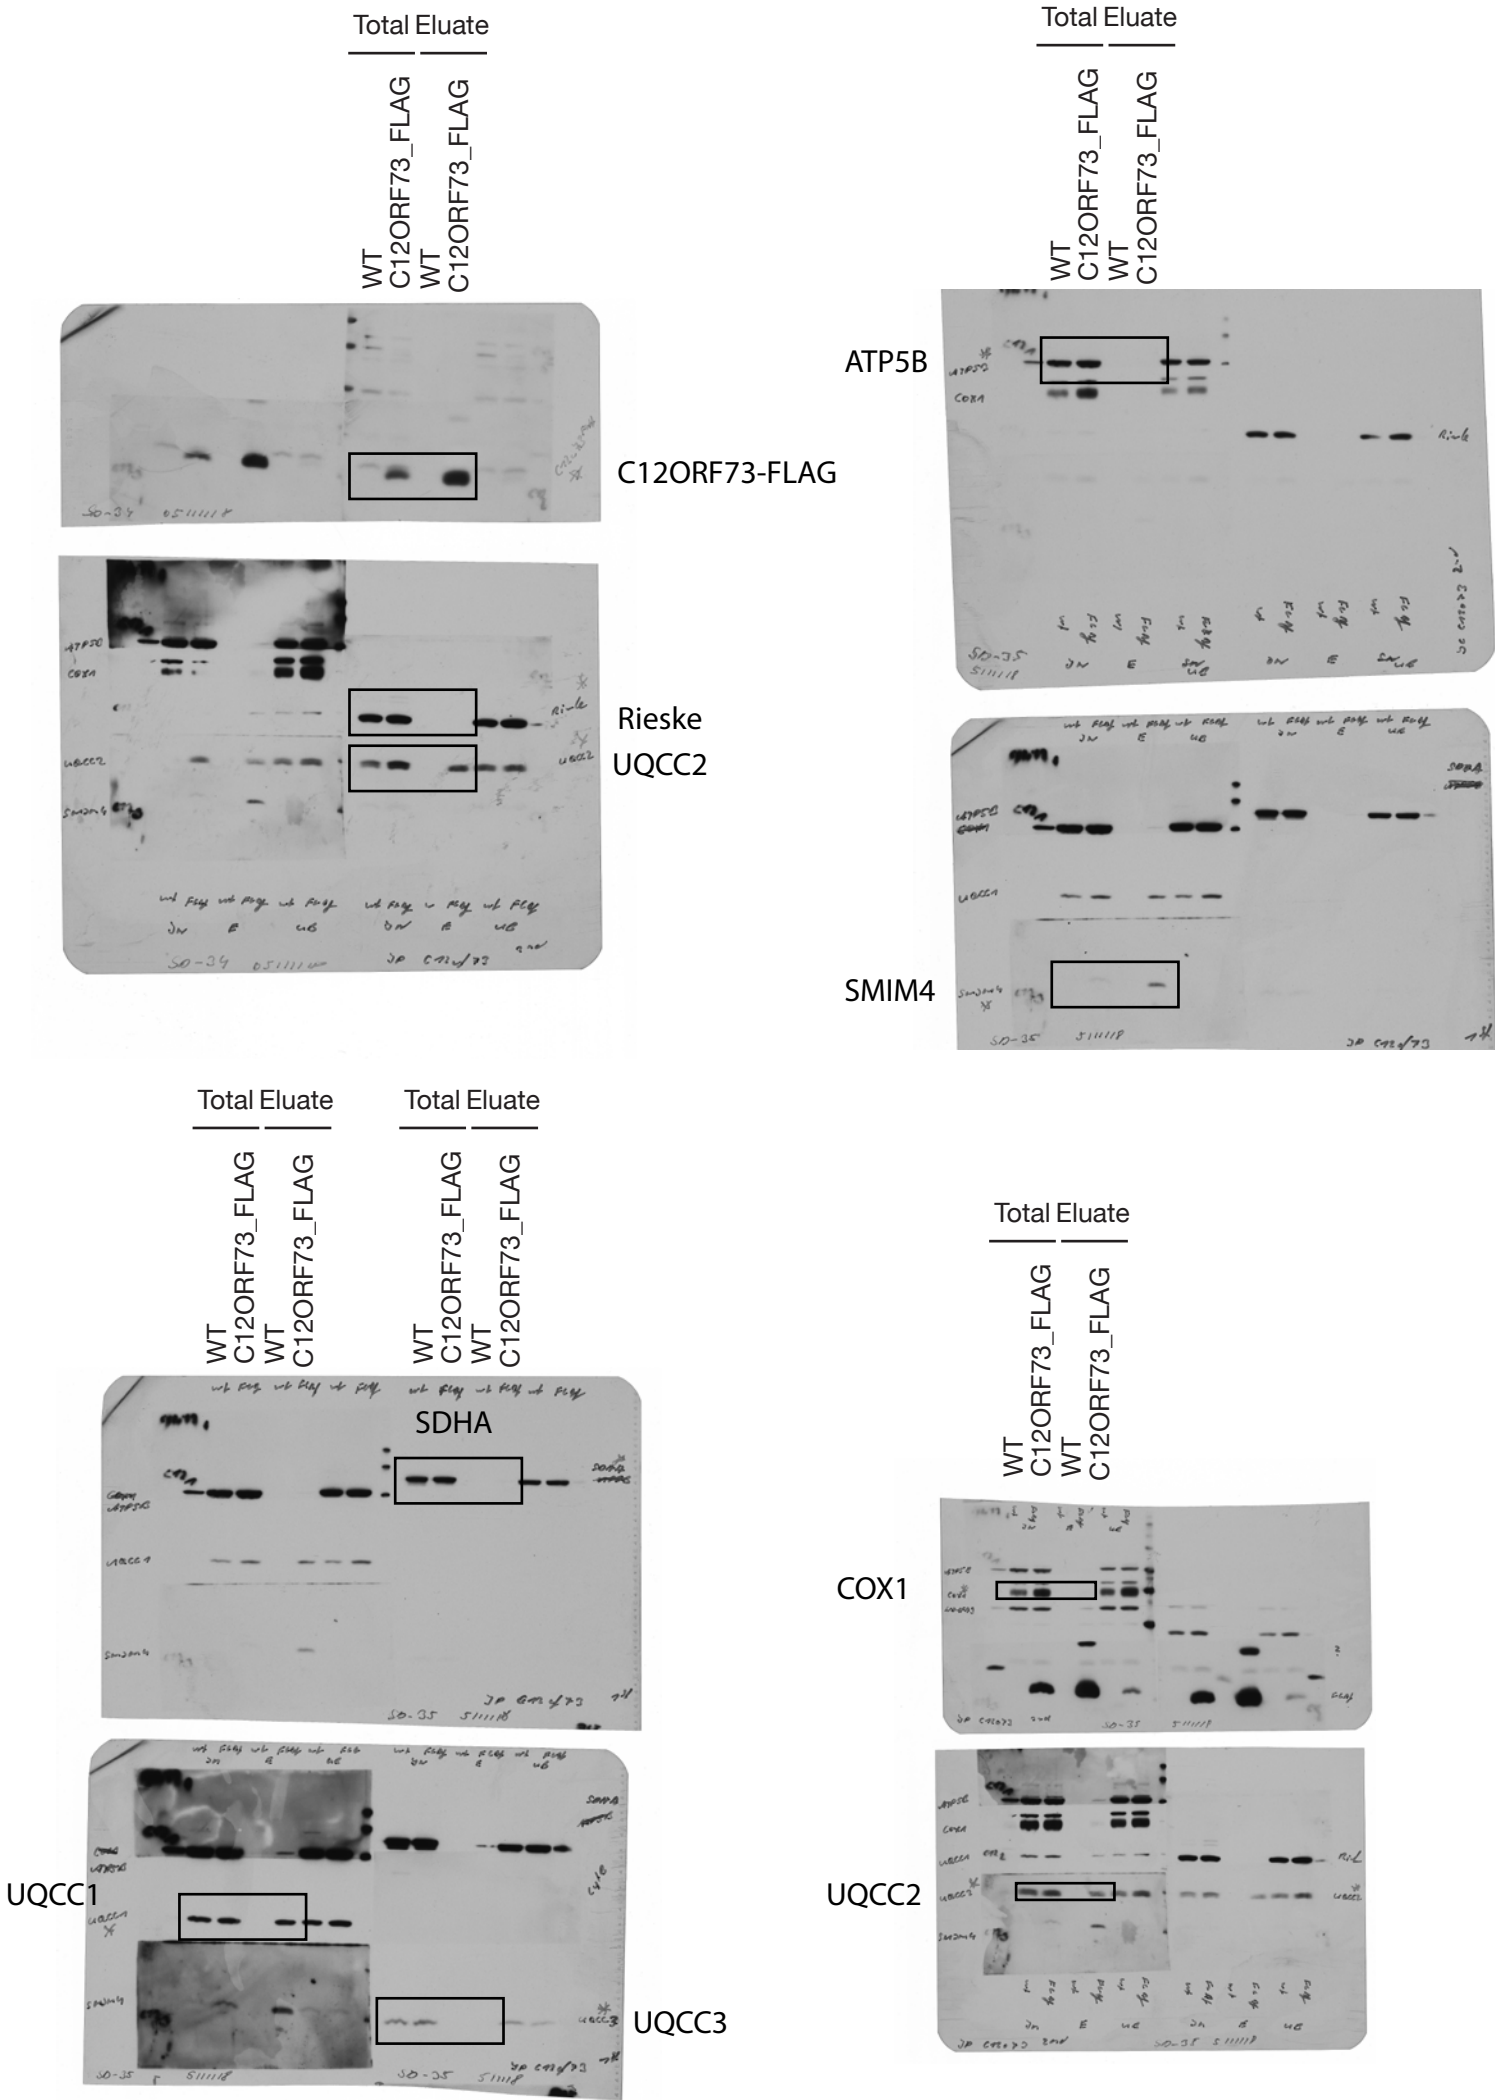

Supplement: fig5-data1 [file elife-68213-fig5-data1-v1.zip]

Figure 5 supplement 1 related to Figure 5 supplement 1B

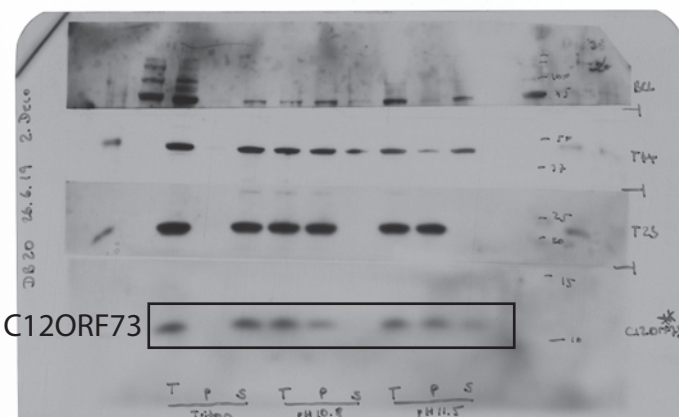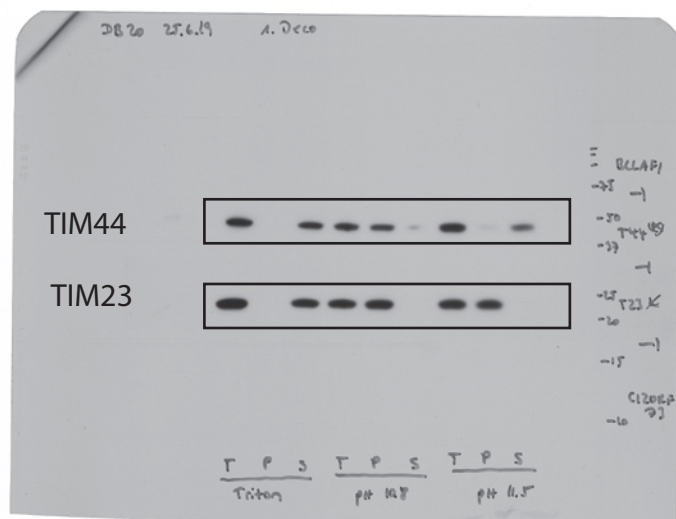

Supplement: fig5-figsupp1-data1 [file elife-68213-fig5-figsupp1-data1-v1.zip]

Figure 5 supplement 1 related to Figure 5 supplement 1D

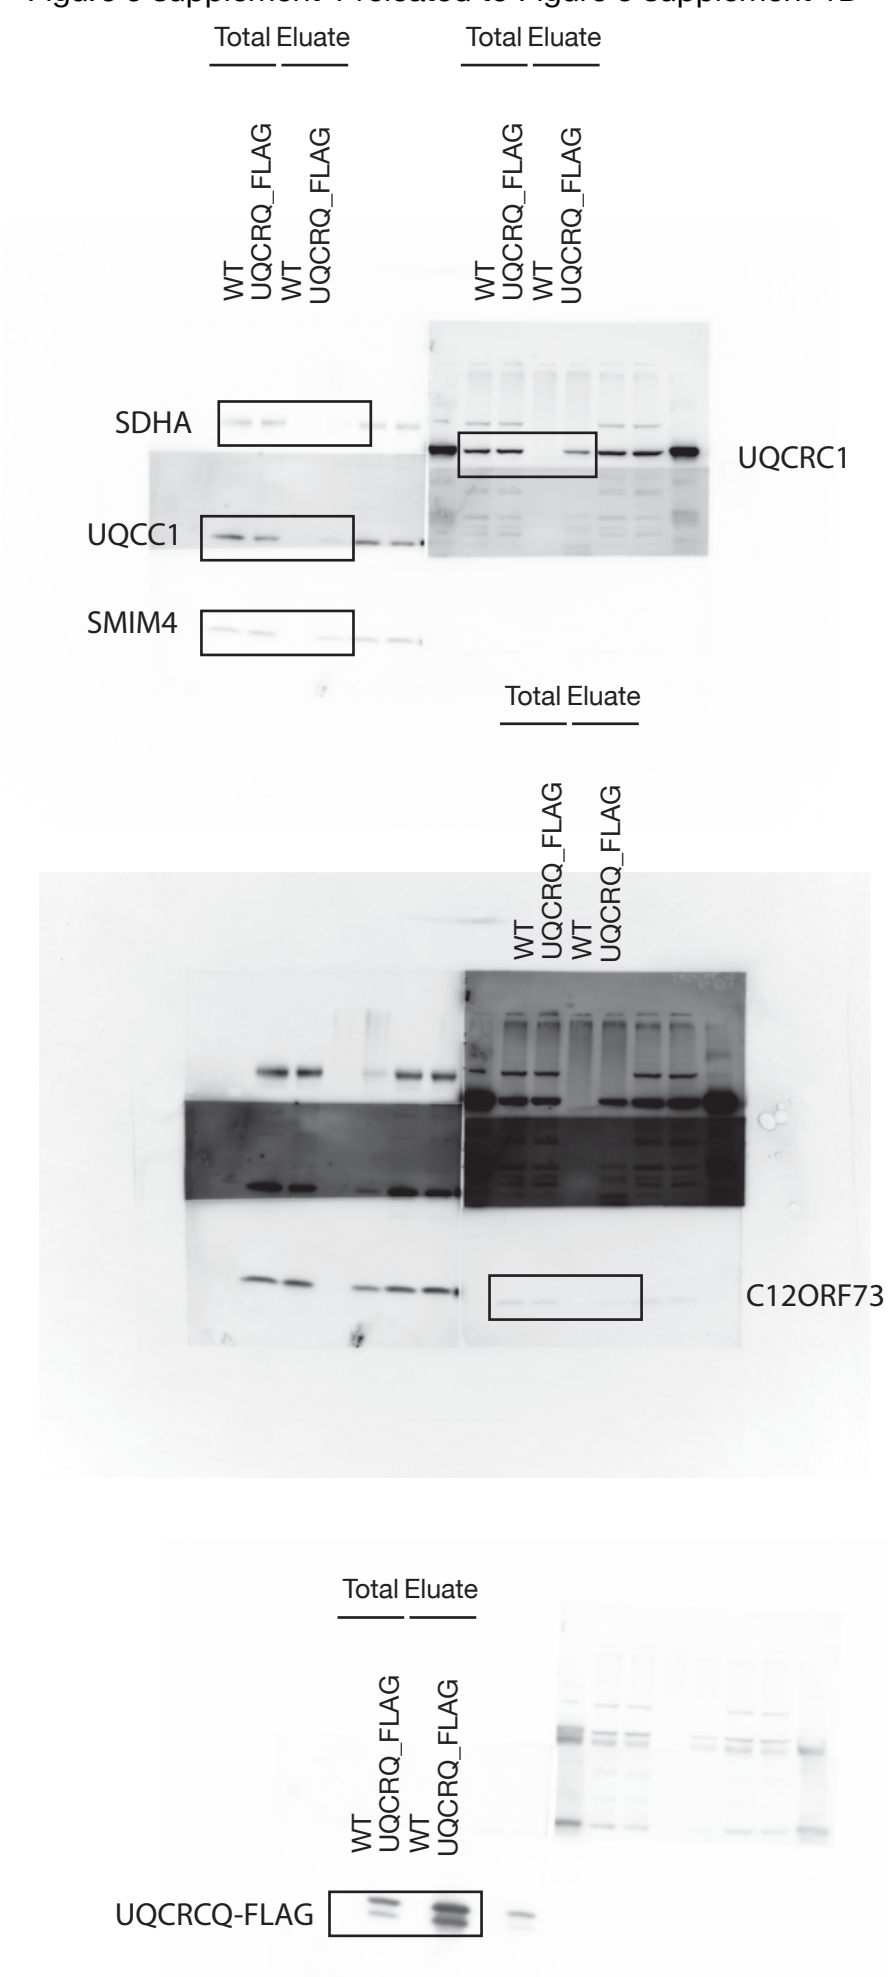

Supplement: fig5-figsupp1-data1 [file elife-68213-fig5-figsupp1-data1-v1.zip]

Figure\_5\_supplement\_1\_source\_data\_2\_Figure\_5\_supplement\_1C

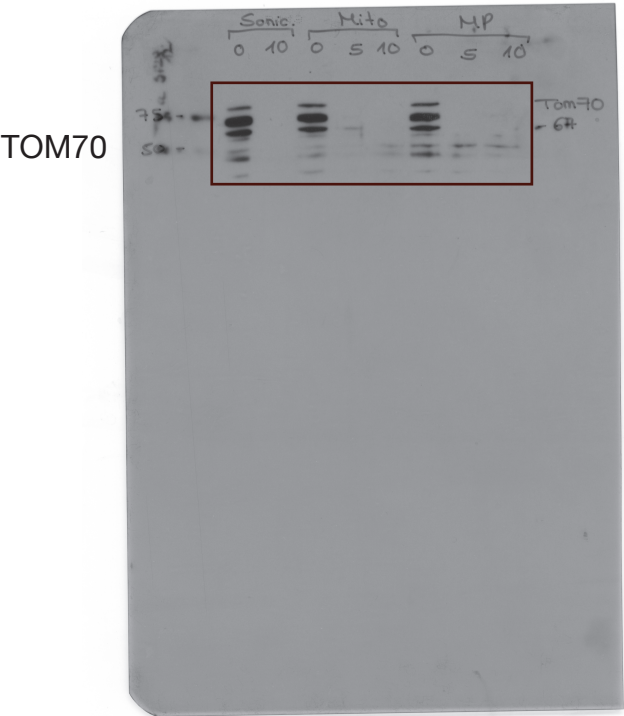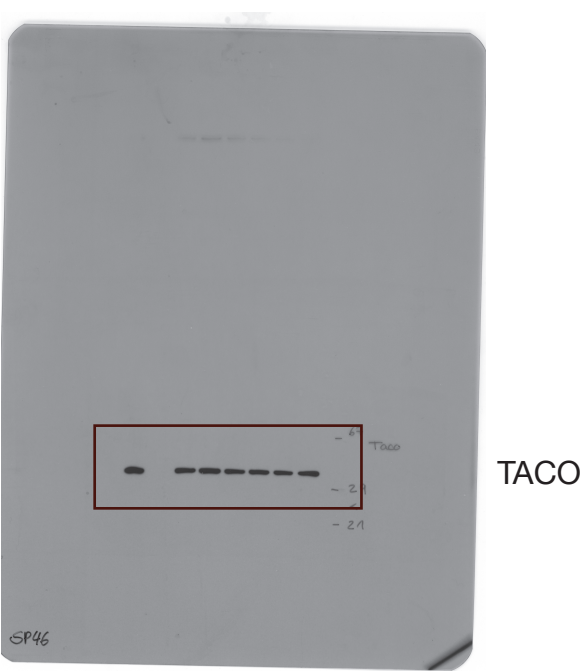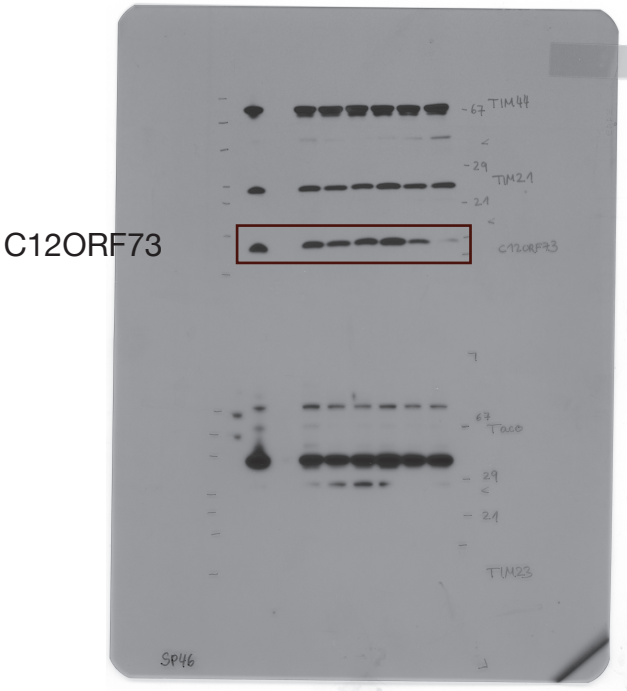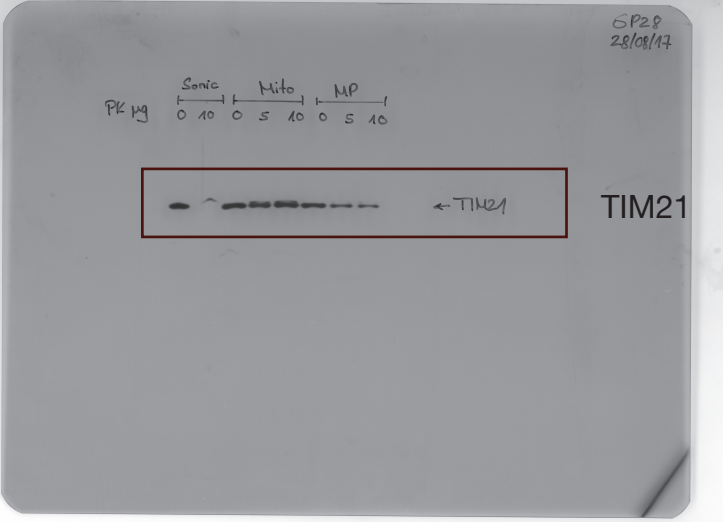

Supplement: fig5-figsupp1-data1 [file elife-68213-fig5-figsupp1-data1-v1.zip]

Figure\_5\_supplement\_1\_source\_data\_6\_Figure\_5\_supplement\_1G

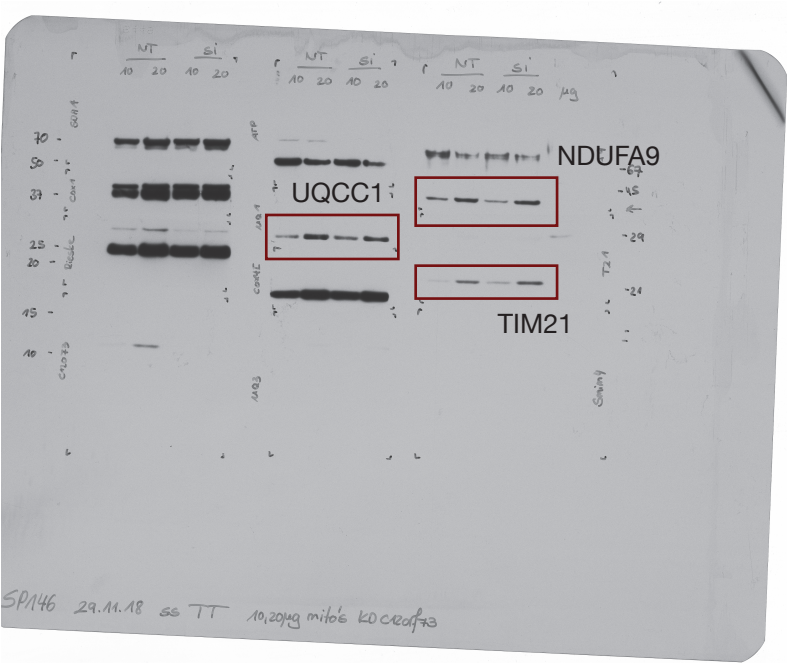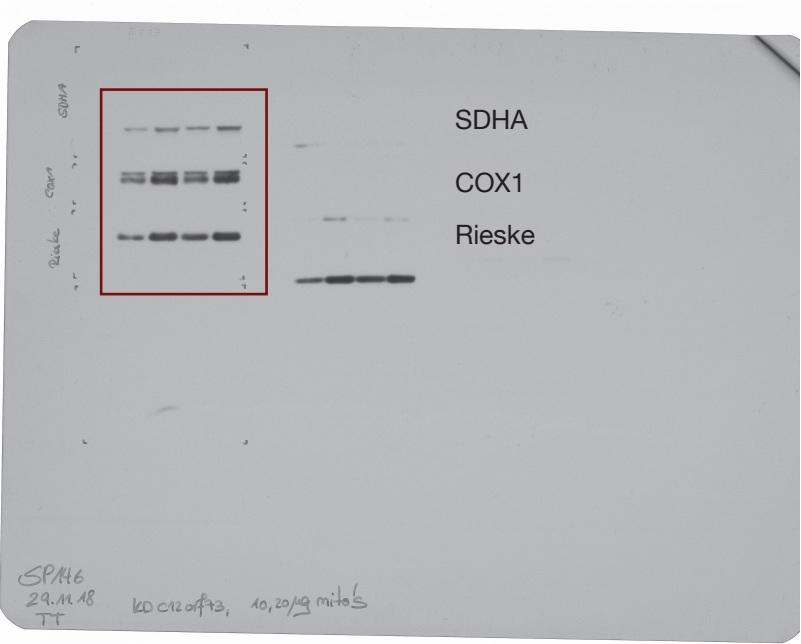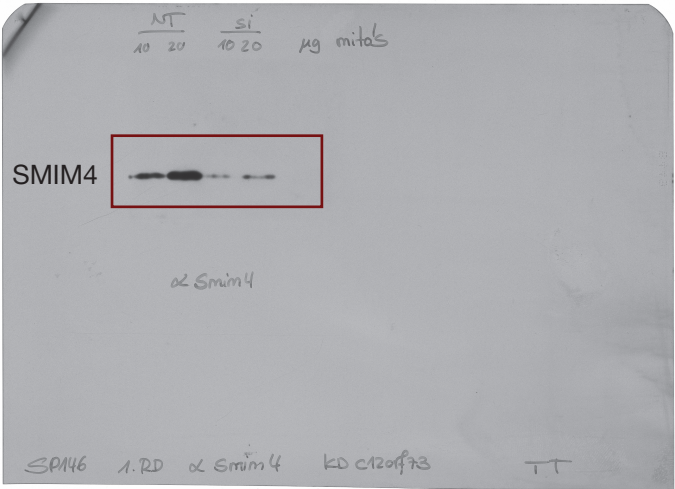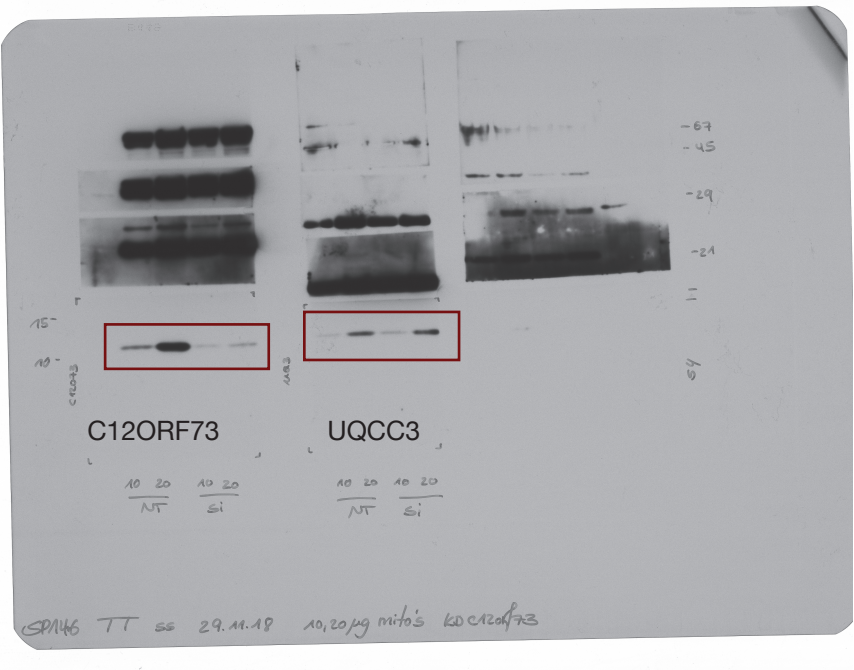

Supplement: fig5-figsupp1-data2 [file elife-68213-fig5-figsupp1-data2-v1.zip]

Figure\_5\_supplement\_1\_source\_data\_6\_Figure\_5\_supplement\_1G

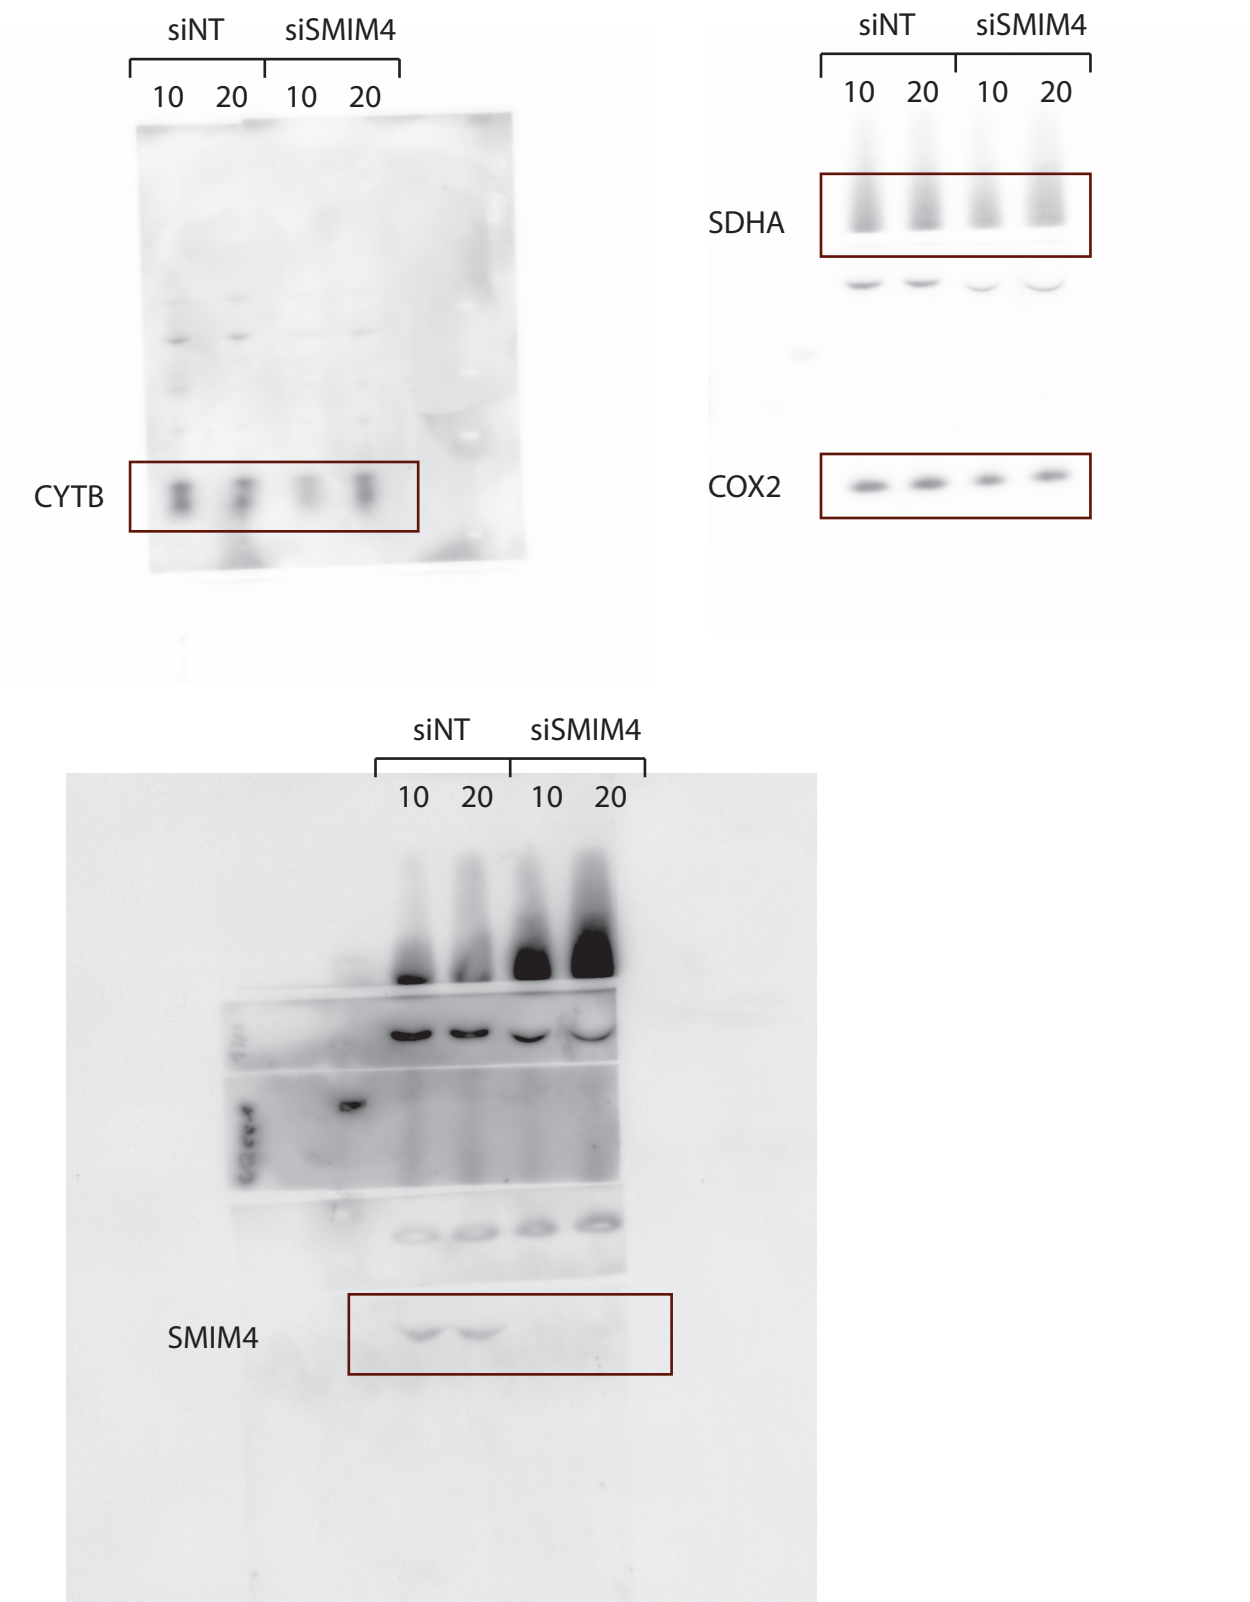

Supplement: fig5-figsupp1-data2 [file elife-68213-fig5-figsupp1-data2-v1.zip]

Figure 5 supplement 1 related to Figure 5 supplement 1E

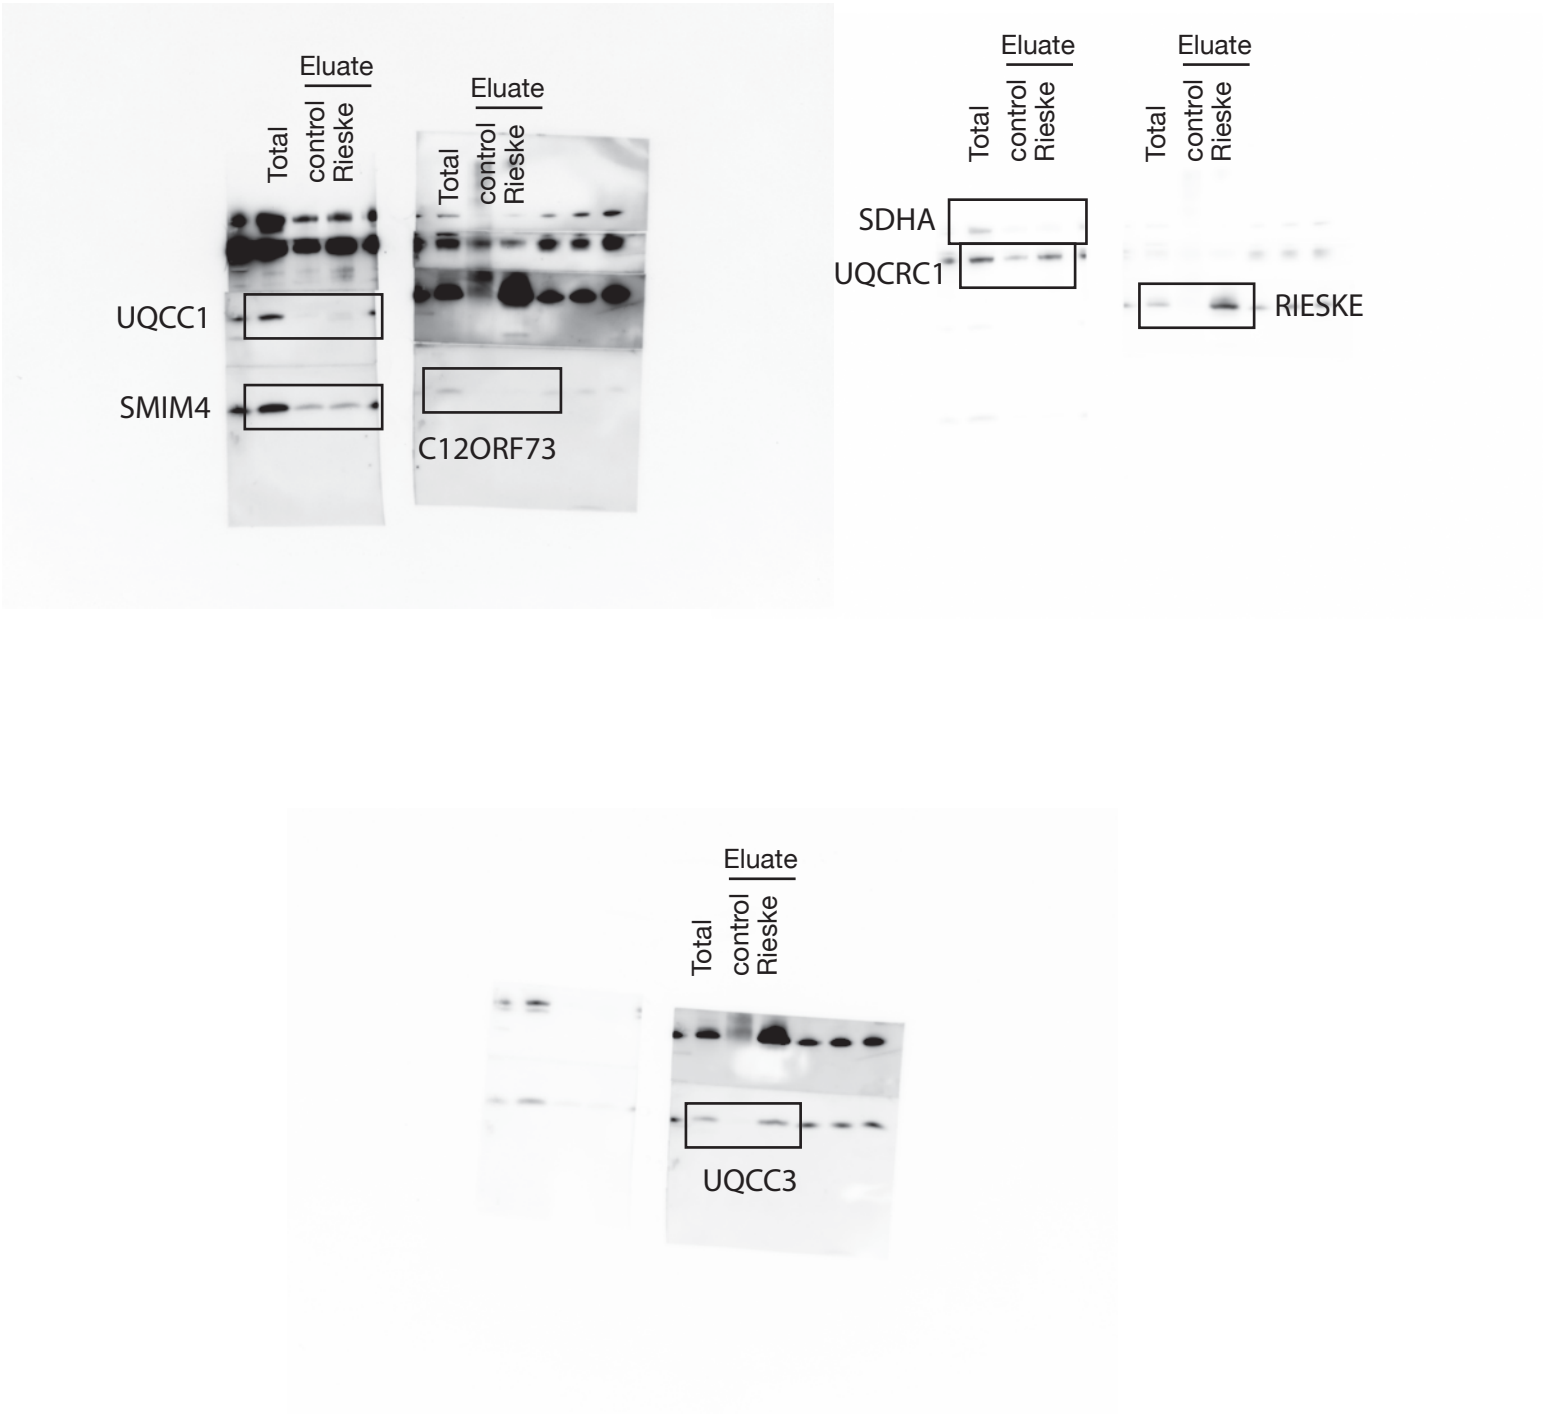

Supplement: fig5-figsupp1-data2 [file elife-68213-fig5-figsupp1-data2-v1.zip]

Figure\_6\_source\_data\_2\_Figure\_6B

UQCC1  
SMIM4

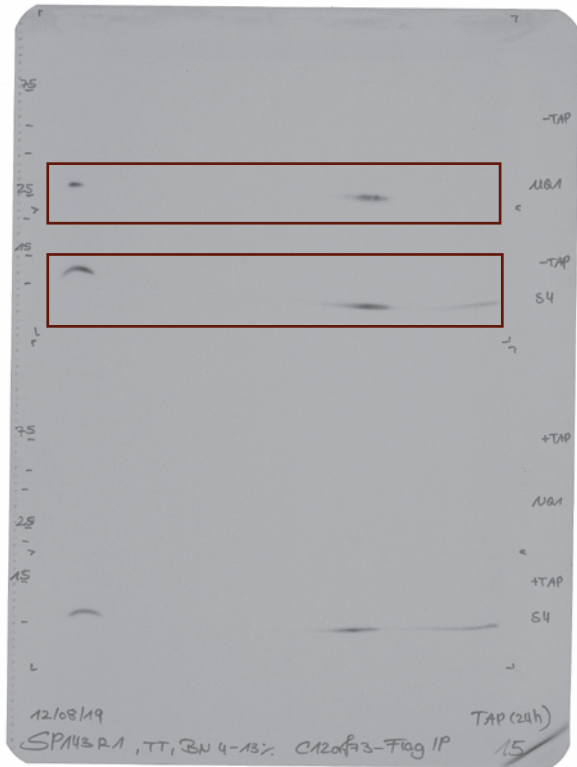

UQCC2

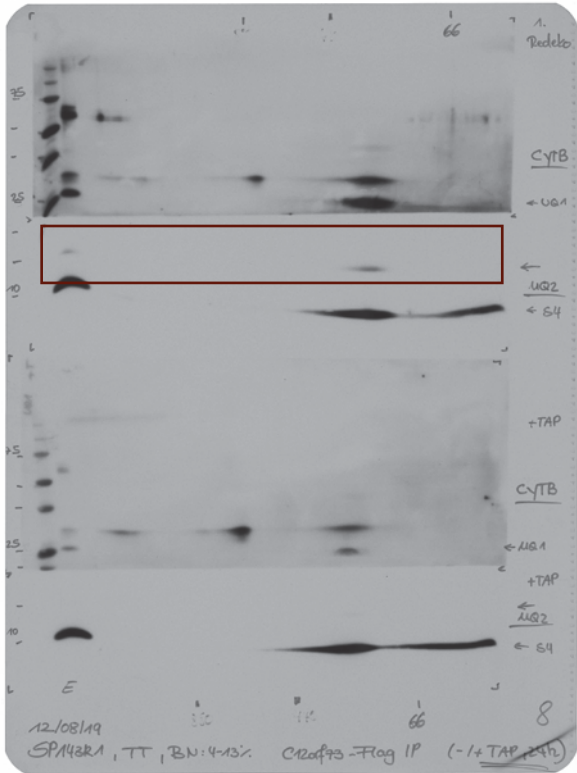

C12ORF73

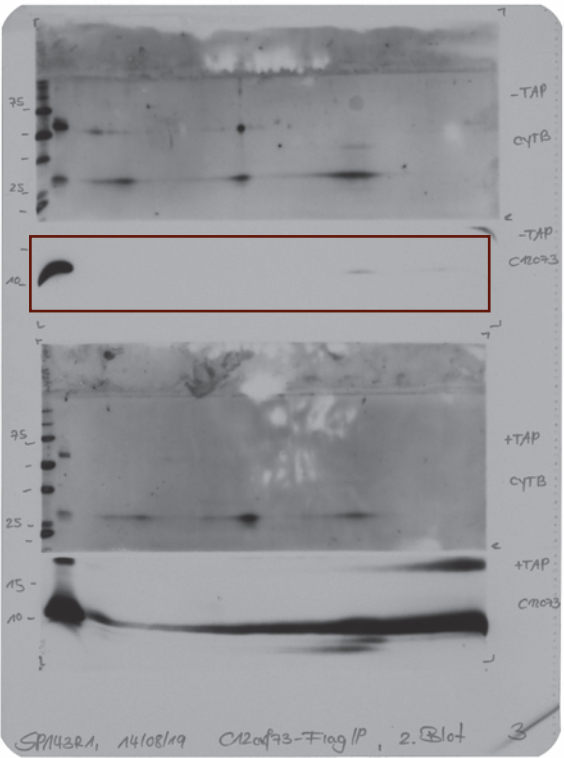

Supplement: fig6-data1 [file elife-68213-fig6-data1-v1.zip]

SDHA

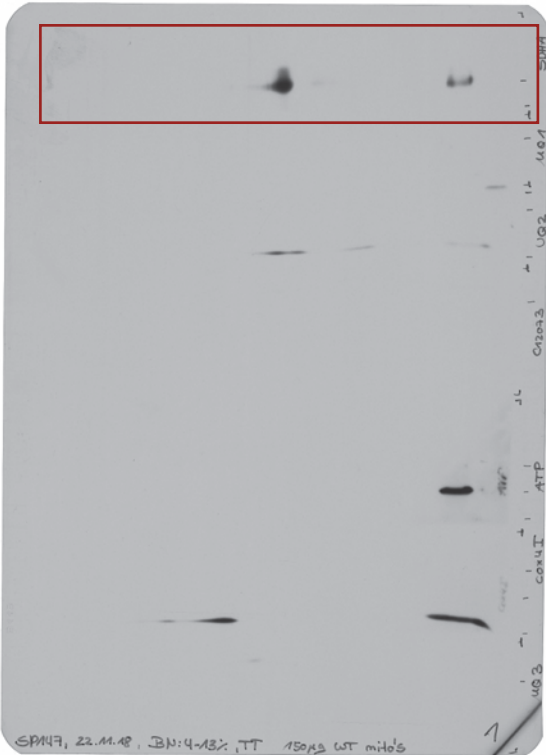

UQC2

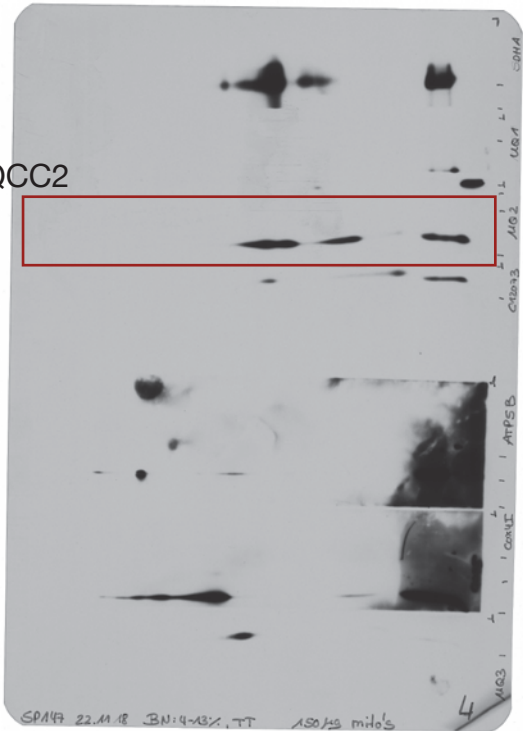

COX4I

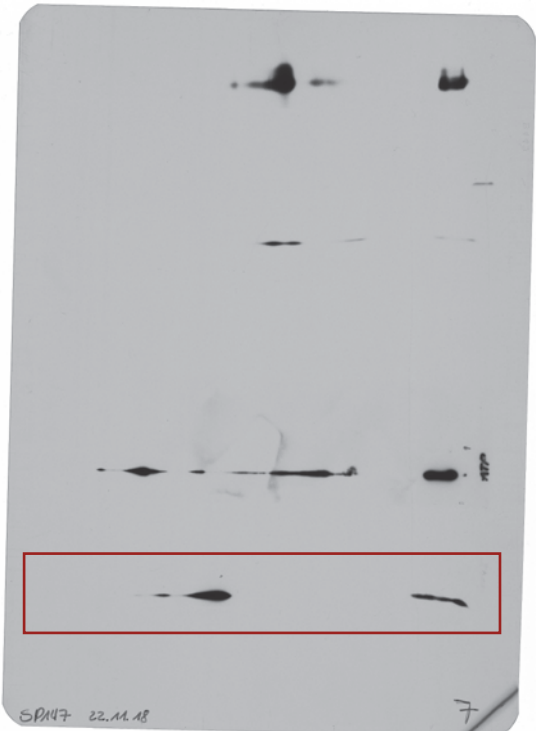

UQC3

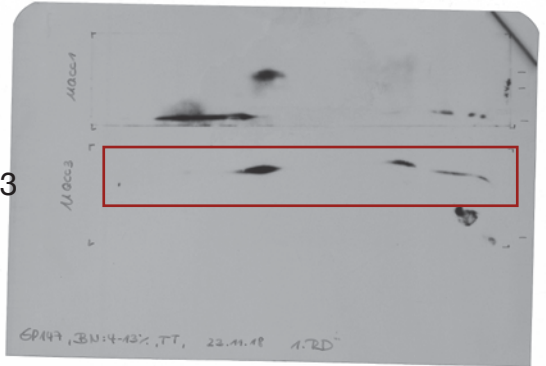

UQC1

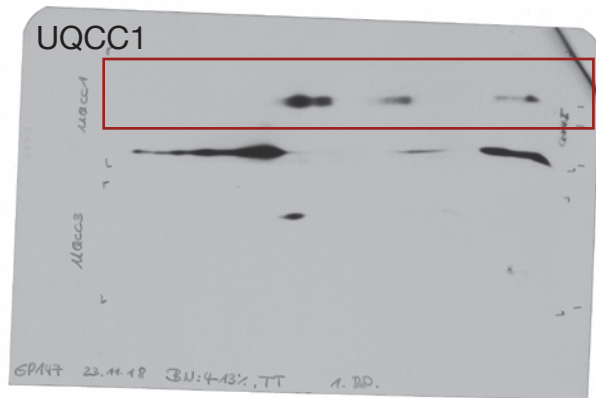

SMIM4

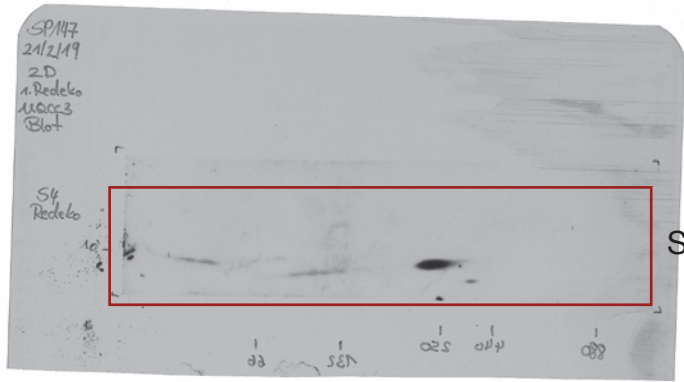

ATP5B

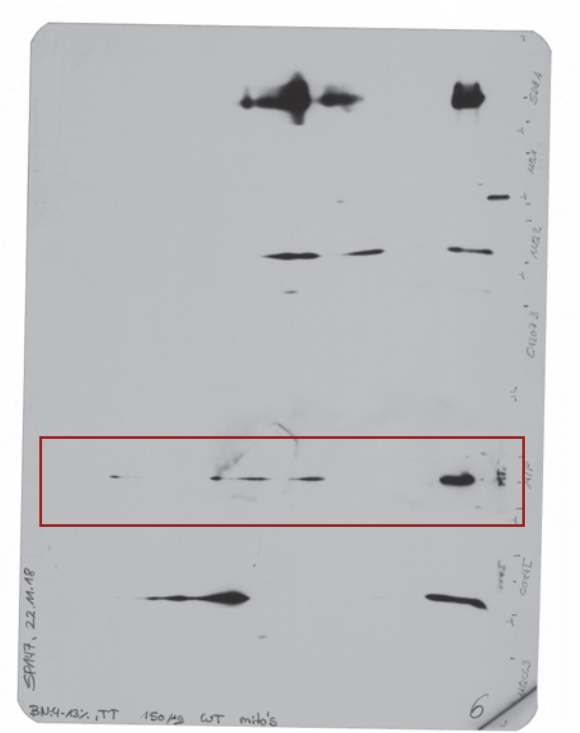

C12ORF73

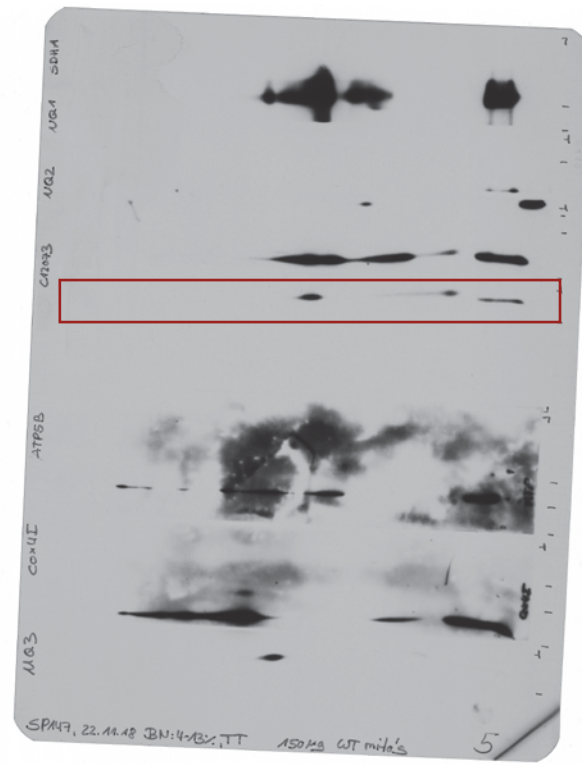

Supplement: fig6-data1 [file elife-68213-fig6-data1-v1.zip]

Figure\_6\_source\_data\_6\_Figure\_6E

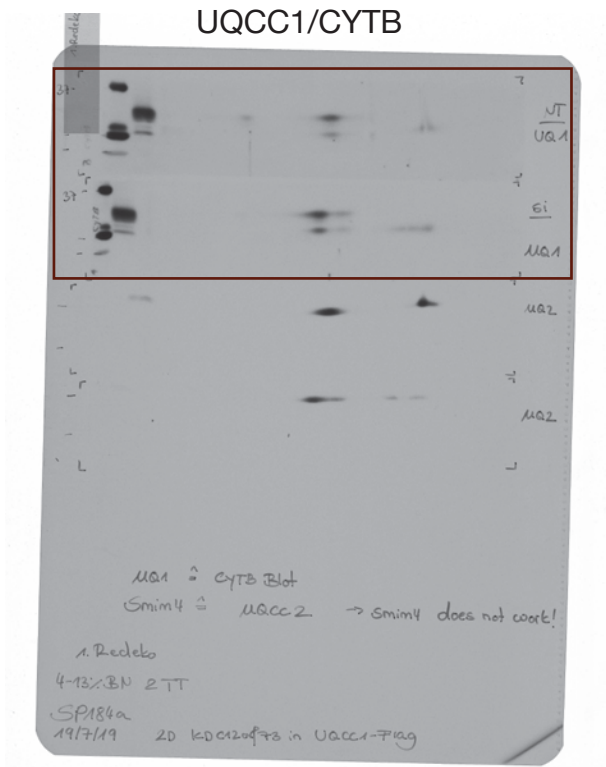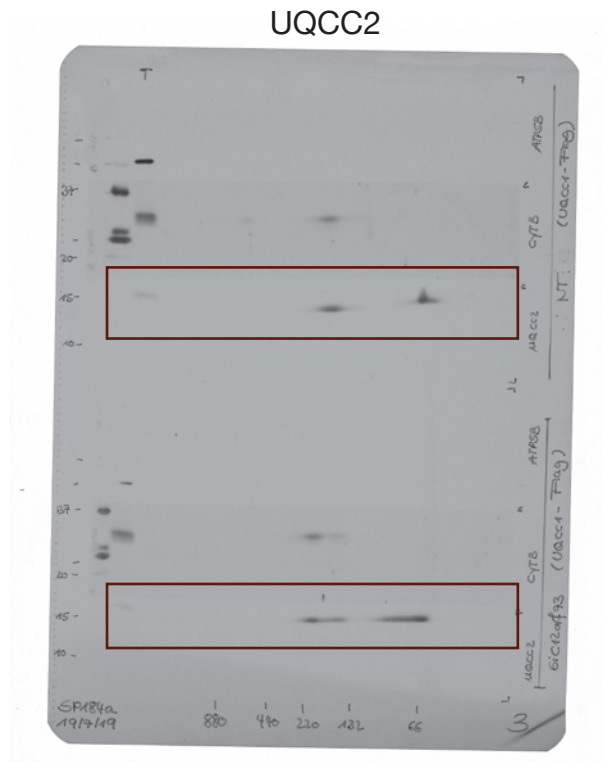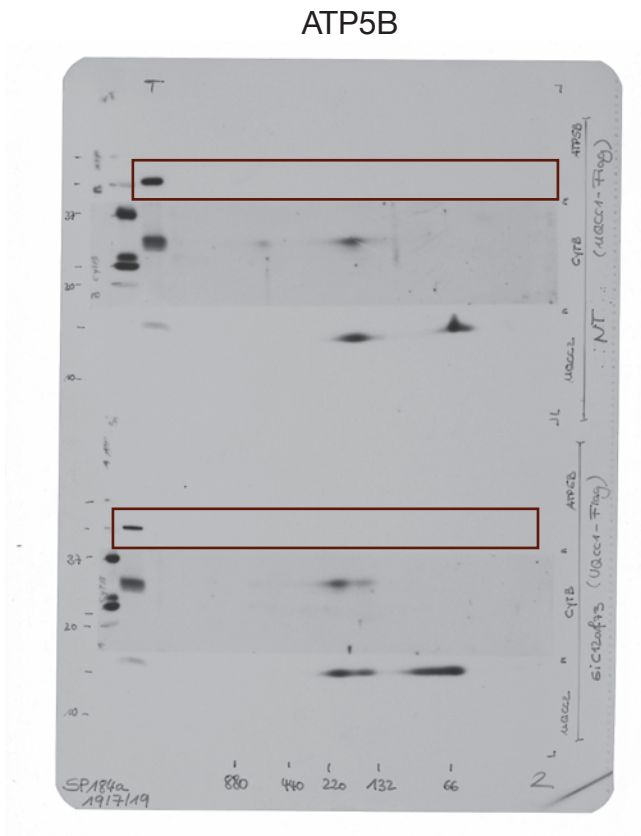

Supplement: fig6-data1 [file elife-68213-fig6-data1-v1.zip]

Figure\_6\_source\_data\_3\_Figure\_6C

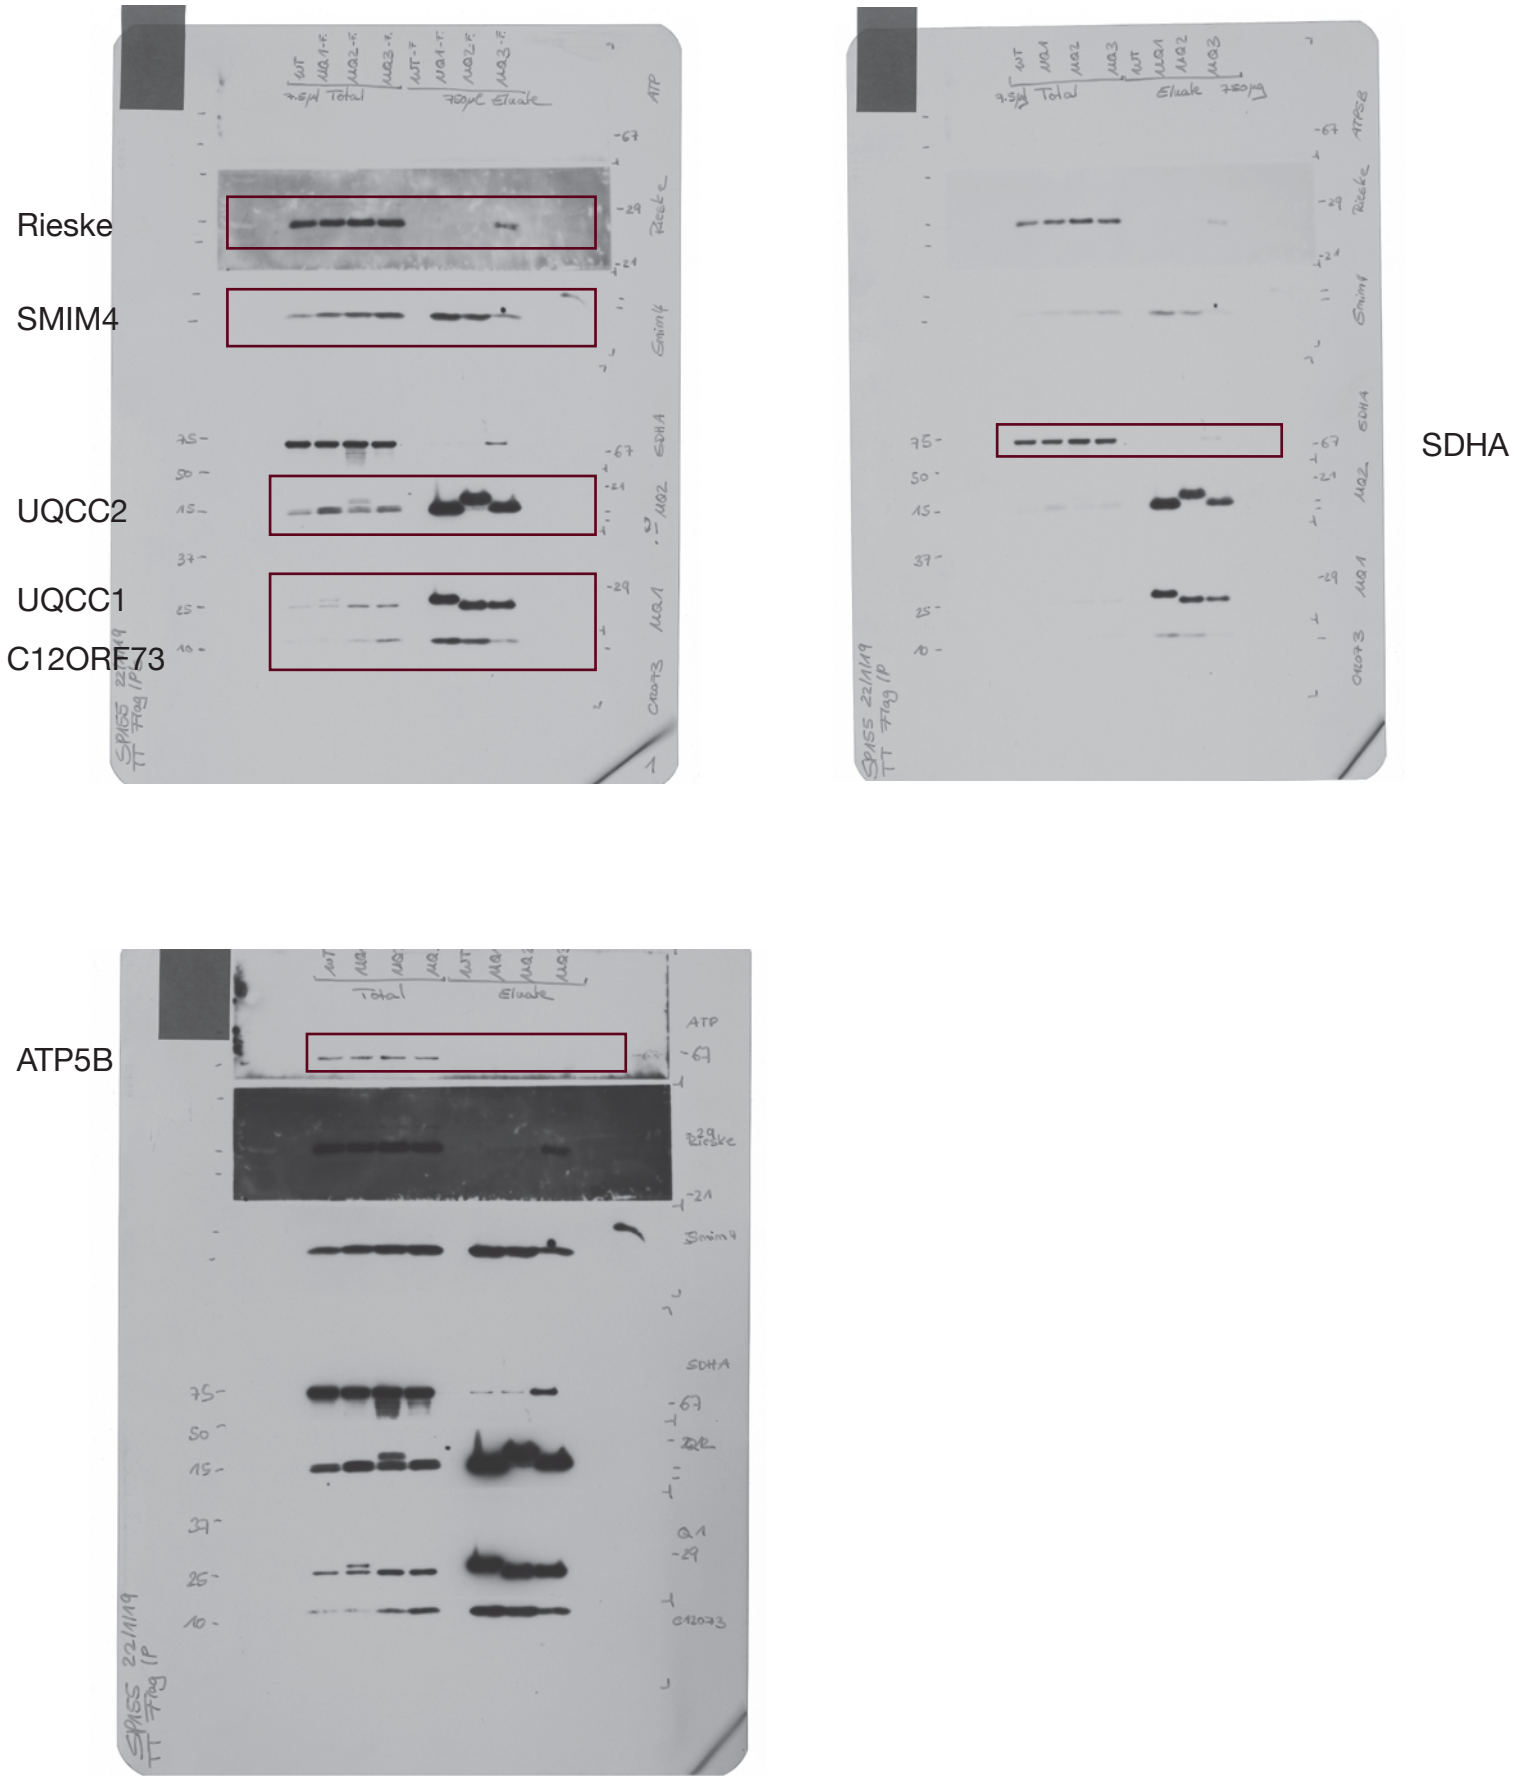

Supplement: fig6-data1 [file elife-68213-fig6-data1-v1.zip]
